# Supplementary material for: Rejuvenating aged osteoprogenitors for bone repair
Source: bioRxiv preprint, doi:10.1101/2024.10.22.619605, version 2 (2024-12-04)
Supplement: Source Data 2 [file 619605_file03.xlsx]

## Sheet: Sup Table 1
Supp Table 1 Periosteum CD90 Young vs Aged	p_val	avg_log2FC	pct.1	pct.2	p_val_adj	Genes
Col3a1	8.52461e-71	1.73707	1	0.959	2.75217e-66	Col3a1
Sparc	1.83443e-70	1.23953	1	0.971	5.92247e-66	Sparc
Col1a1	1.42922e-69	1.56477	1	0.963	4.61425e-65	Col1a1
Col1a2	5.04958e-68	1.253	1	0.996	1.63026e-63	Col1a2
Gm42418	3.52838e-64	-2.44184	1	1	1.13914e-59	Gm42418	excluded
Meg3	3.65836e-58	1.73531	0.95	0.459	1.1811e-53	Meg3
Nid1	9.07638e-51	1.14745	0.976	0.88	2.93031e-46	Nid1
Tpt1	1.15809e-48	0.638768	1	0.988	3.73891e-44	Tpt1
Rpl12	1.03524e-46	0.805679	1	0.926	3.34228e-42	Rpl12
mt-Co3	4.47937e-44	0.608087	1	0.992	1.44616e-39	mt-Co3
Gpc3	5.15643e-40	1.07299	0.974	0.595	1.66475e-35	Gpc3
Col5a2	1.10423e-39	0.884921	0.967	0.69	3.56499e-35	Col5a2
mt-Atp6	5.84091e-39	0.602412	1	0.988	1.88574e-34	mt-Atp6
Mmp2	4.83828e-36	0.897941	0.989	0.81	1.56204e-31	Mmp2
Rps18	4.29669e-33	0.706483	0.996	0.897	1.38719e-28	Rps18
Rps15	1.80658e-32	0.656981	0.996	0.934	5.83253e-28	Rps15
Csrp2	7.597e-32	1.02058	0.864	0.417	2.45269e-27	Csrp2
Rian	2.76942e-31	1.04112	0.675	0.19	8.94109e-27	Rian
Serping1	2.78483e-31	0.79255	0.996	0.839	8.99082e-27	Serping1
Sfrp2	6.69848e-31	0.987543	0.916	0.541	2.1626e-26	Sfrp2
Ubb	1.4391e-30	0.827751	0.974	0.69	4.64612e-26	Ubb
Rps12	2.42095e-30	0.469498	1	1	7.81603e-26	Rps12
Rpl21	1.73806e-29	0.620066	0.998	0.921	5.61132e-25	Rpl21
Myoc	8.59344e-29	-2.05507	0.106	0.446	2.77439e-24	Myoc
Rpl10	1.99511e-28	0.662893	0.991	0.855	6.44123e-24	Rpl10
Xist	3.49353e-28	0.824901	0.928	0.682	1.12789e-23	Xist
Gap43	2.20856e-27	0.980919	0.532	0.099	7.13033e-23	Gap43
AC149090.1	2.31664e-27	-1.04378	0.165	0.488	7.47926e-23	AC149090.1
Vim	3.26831e-27	-0.837813	0.993	0.979	1.05517e-22	Vim
Itm2a	1.77506e-26	0.740226	0.767	0.244	5.73077e-22	Itm2a
Ahnak	6.96257e-26	-0.655436	1	1	2.24787e-21	Ahnak
Rpl29	1.76874e-25	0.637538	0.985	0.818	5.71038e-21	Rpl29
Col5a1	2.85136e-25	0.754348	0.965	0.702	9.20561e-21	Col5a1
Calr	3.75515e-25	0.720662	0.967	0.76	1.21235e-20	Calr
Aspn	5.18658e-25	0.814961	0.923	0.57	1.67449e-20	Aspn
Lama2	6.87608e-25	0.796815	0.806	0.388	2.21994e-20	Lama2
Tuba1a	7.35165e-25	0.72019	0.98	0.793	2.37348e-20	Tuba1a
Rpl26	1.74324e-24	0.478685	0.998	0.955	5.62804e-20	Rpl26
mt-Nd1	2.81889e-24	0.531904	0.998	0.959	9.10079e-20	mt-Nd1
Neo1	3.1962e-24	0.726025	0.606	0.174	1.03189e-19	Neo1
Postn	3.34706e-24	0.896751	0.769	0.335	1.0806e-19	Postn
Plpp3	1.6841e-23	0.713366	0.989	0.971	5.4371e-19	Plpp3
Serpinh1	1.82463e-23	0.557979	0.993	0.942	5.89082e-19	Serpinh1
Clec3b	2.14303e-23	0.598104	0.974	0.917	6.91879e-19	Clec3b
Adamts2	2.31754e-23	0.732848	0.866	0.483	7.48216e-19	Adamts2
Peg3	6.38999e-23	1.02896	0.514	0.124	2.06301e-18	Peg3
Ctsl	8.73183e-23	0.563082	0.991	0.884	2.81907e-18	Ctsl
Ogn	9.53482e-23	0.690575	0.989	0.893	3.07832e-18	Ogn
Slc38a4	1.75879e-22	0.655466	0.332	0.008	5.67825e-18	Slc38a4
Serpinf1	4.73333e-22	0.664159	0.983	0.752	1.52815e-17	Serpinf1
Lum	1.88886e-21	0.585664	0.989	0.888	6.09819e-17	Lum
Apbb2	1.98585e-21	0.714577	0.778	0.405	6.41133e-17	Apbb2
Rps25	2.24722e-21	0.504937	0.996	0.917	7.25516e-17	Rps25
Rarres2	3.19521e-21	0.655726	0.961	0.731	1.03158e-16	Rarres2
Ebf1	6.36888e-21	0.588866	0.991	0.884	2.05619e-16	Ebf1
Emilin2	6.84396e-21	0.658914	0.934	0.707	2.20957e-16	Emilin2
Dpp4	8.47681e-21	0.678695	0.932	0.69	2.73674e-16	Dpp4
Pcolce2	1.09594e-20	0.648956	0.945	0.835	3.53825e-16	Pcolce2
Laptm4a	4.43478e-20	0.536328	0.991	0.835	1.43177e-15	Laptm4a
Hbb-bs	4.59788e-20	2.02783	0.594	0.198	1.48442e-15	Hbb-bs
Rpl13a	5.45925e-20	0.379965	0.996	0.955	1.76252e-15	Rpl13a
Kcnq1ot1	1.35526e-19	0.939744	0.78	0.483	4.37546e-15	Kcnq1ot1
Eif1	3.86342e-19	0.438182	1	0.942	1.2473e-14	Eif1
mt-Cytb	6.94848e-19	0.408417	1	0.963	2.24332e-14	mt-Cytb
Gm26771	3.57912e-18	0.744359	0.4	0.079	1.15552e-13	Gm26771
Rpl14	4.53977e-18	0.42835	0.994	0.897	1.46567e-13	Rpl14
Itm2b	4.61987e-18	0.432616	0.994	0.93	1.49153e-13	Itm2b
mt-Co1	5.01008e-18	0.334997	1	0.992	1.6175e-13	mt-Co1
Pcsk6	5.86488e-18	0.733141	0.833	0.504	1.89348e-13	Pcsk6
Ftl1	5.94065e-18	0.386802	0.998	0.917	1.91794e-13	Ftl1
Mir99ahg	7.53363e-18	0.682595	0.594	0.227	2.43223e-13	Mir99ahg
Igf1	8.56466e-18	0.77685	0.65	0.24	2.7651e-13	Igf1
Nova1	1.05759e-17	0.695005	0.717	0.36	3.41443e-13	Nova1
Fth1	1.60104e-17	0.323418	1	0.988	5.16897e-13	Fth1
Mrgprg	2.18657e-17	-1.37256	0.103	0.339	7.05935e-13	Mrgprg
Lamb2	2.23745e-17	0.567464	0.839	0.479	7.2236e-13	Lamb2
Mfap2	2.87438e-17	0.651788	0.662	0.302	9.27994e-13	Mfap2
Rpl9	5.79574e-17	0.41296	0.998	0.921	1.87116e-12	Rpl9
Rspo3	6.74484e-17	0.665218	0.47	0.14	2.17757e-12	Rspo3
Ace	7.10374e-17	0.627021	0.765	0.401	2.29344e-12	Ace
Ccnd1	7.72652e-17	-0.917169	0.143	0.384	2.49451e-12	Ccnd1
C430049B03Rik	1.39114e-16	0.592519	0.292	0.025	4.4913e-12	C430049B03Rik
mt-Co2	1.64632e-16	0.299092	1	0.988	5.31513e-12	mt-Co2
Rpl13	1.86011e-16	0.377502	1	1	6.00537e-12	Rpl13
Rpl27a	1.93819e-16	0.345928	1	0.983	6.25745e-12	Rpl27a
Col6a3	2.38977e-16	0.395579	0.921	0.599	7.71538e-12	Col6a3
Cpz	3.27978e-16	0.586914	0.31	0.041	1.05888e-11	Cpz
Rps4x	3.81491e-16	0.399594	0.996	0.975	1.23164e-11	Rps4x
Cavin1	3.99967e-16	-0.694943	0.965	0.955	1.29129e-11	Cavin1
Oat	4.70012e-16	0.527282	0.851	0.488	1.51744e-11	Oat
Ndrg1	4.73566e-16	-0.834368	0.185	0.426	1.52891e-11	Ndrg1
Mfap5	5.44804e-16	0.615859	0.96	0.843	1.7589e-11	Mfap5
Ppib	6.54229e-16	0.546068	0.947	0.711	2.11218e-11	Ppib
Rps2	7.11054e-16	0.398799	1	0.909	2.29564e-11	Rps2
Ly6a	7.5731e-16	0.349708	0.998	0.938	2.44498e-11	Ly6a
Cpxm1	9.26191e-16	0.626687	0.679	0.326	2.99021e-11	Cpxm1
Rpl8	1.11888e-15	0.416467	0.994	0.917	3.61232e-11	Rpl8
Plagl1	1.30446e-15	0.491919	0.4	0.095	4.21145e-11	Plagl1
Rack1	2.08732e-15	0.379045	0.996	0.934	6.73891e-11	Rack1
Myl12a	2.55452e-15	0.548827	0.824	0.479	8.24727e-11	Myl12a
Arf4	3.10563e-15	0.532195	0.89	0.595	1.00265e-10	Arf4
Reck	3.12412e-15	0.548978	0.593	0.26	1.00862e-10	Reck
Rpl5	3.31302e-15	0.396207	0.987	0.93	1.06961e-10	Rpl5
Atp5b	3.53869e-15	0.524435	0.857	0.512	1.14246e-10	Atp5b
Tmeff2	4.57773e-15	0.553021	0.727	0.413	1.47792e-10	Tmeff2
Rplp0	5.21949e-15	0.37818	1	0.942	1.68511e-10	Rplp0
Rps14	5.75285e-15	0.292945	0.998	1	1.85731e-10	Rps14
Ubc	7.28104e-15	0.476184	0.963	0.744	2.35068e-10	Ubc
Tubb2a	7.35964e-15	0.486412	0.602	0.264	2.37606e-10	Tubb2a
Rpl23	7.97562e-15	0.346666	0.998	0.988	2.57493e-10	Rpl23
Ccdc80	8.24786e-15	0.458065	0.817	0.471	2.66282e-10	Ccdc80
Col6a5	1.00516e-14	-1.14656	0.05	0.223	3.24517e-10	Col6a5
Malat1	1.18585e-14	0.50297	1	0.926	3.82853e-10	Malat1
Crip1	1.54935e-14	-0.681959	0.98	0.979	5.00207e-10	Crip1
Rps6	1.86478e-14	0.40735	0.996	0.93	6.02045e-10	Rps6
Antxr2	2.07551e-14	0.510433	0.846	0.533	6.7008e-10	Antxr2
Cd248	2.44136e-14	0.505395	0.954	0.789	7.88193e-10	Cd248
mt-Nd2	2.59053e-14	0.382132	1	0.938	8.36354e-10	mt-Nd2
Ostc	4.0514e-14	0.506785	0.824	0.475	1.308e-09	Ostc
Il18	7.95075e-14	0.528447	0.613	0.285	2.5669e-09	Il18
Rps23	8.28479e-14	0.274566	1	0.983	2.67474e-09	Rps23
Pi15	1.07458e-13	0.593413	0.506	0.207	3.46928e-09	Pi15
Selenok	1.10591e-13	0.533507	0.888	0.595	3.57042e-09	Selenok
Luc7l2	1.34768e-13	0.470784	0.829	0.496	4.35099e-09	Luc7l2
Htra1	1.4069e-13	0.548962	0.943	0.727	4.54216e-09	Htra1
Tgfbr3	1.41853e-13	0.458948	0.84	0.512	4.57973e-09	Tgfbr3
Col6a1	1.49769e-13	0.4095	0.983	0.806	4.8353e-09	Col6a1
Rps11	2.26109e-13	0.380721	0.998	0.938	7.29994e-09	Rps11
Rpl17	2.60298e-13	0.308484	0.998	0.979	8.40371e-09	Rpl17
Cd63	2.67699e-13	0.526441	0.95	0.702	8.64266e-09	Cd63
AY036118	2.88246e-13	-0.991954	0.881	0.81	9.30602e-09	AY036118
Nrk	3.0915e-13	0.467146	0.29	0.05	9.98092e-09	Nrk
Man1a	3.16644e-13	0.489483	0.969	0.86	1.02228e-08	Man1a
Dpep1	3.33276e-13	0.512428	0.901	0.624	1.07598e-08	Dpep1
Wnt5a	3.78403e-13	0.527828	0.503	0.198	1.22167e-08	Wnt5a
S100a6	4.06104e-13	-0.561447	1	1	1.31111e-08	S100a6
Trpm3	5.34428e-13	0.393522	0.239	0.025	1.7254e-08	Trpm3
Cnpy2	6.45953e-13	0.497597	0.697	0.397	2.08546e-08	Cnpy2
Klf9	6.47545e-13	0.554035	0.835	0.525	2.0906e-08	Klf9
Plec	6.56096e-13	-0.71655	0.539	0.661	2.11821e-08	Plec
Cyb5r3	7.93813e-13	-0.740163	0.563	0.686	2.56283e-08	Cyb5r3
C1qtnf6	8.09394e-13	0.473827	0.495	0.198	2.61313e-08	C1qtnf6
Ndufa13	8.42494e-13	0.441885	0.886	0.591	2.71999e-08	Ndufa13
Lamc1	8.48391e-13	0.457033	0.897	0.612	2.73903e-08	Lamc1
Rps3	8.98542e-13	0.3445	0.996	0.909	2.90094e-08	Rps3
Bgn	1.24073e-12	-0.839417	0.189	0.43	4.00571e-08	Bgn
Eif3f	1.43329e-12	0.459268	0.895	0.599	4.62739e-08	Eif3f
Sec11a	1.51463e-12	0.464124	0.556	0.248	4.88998e-08	Sec11a
Rps8	1.58751e-12	0.293897	1	1	5.12528e-08	Rps8
S100a4	2.00706e-12	-1.6685	0.378	0.55	6.4798e-08	S100a4
Atp9a	2.37732e-12	0.395689	0.27	0.05	7.67518e-08	Atp9a
Pdia6	2.82006e-12	0.476279	0.875	0.624	9.10455e-08	Pdia6
Cebpd	3.23566e-12	0.756648	0.73	0.446	1.04463e-07	Cebpd
Hba-a2	4.05354e-12	1.19831	0.242	0.033	1.30868e-07	Hba-a2
Tspan3	4.92663e-12	0.418394	0.6	0.285	1.59056e-07	Tspan3
Yif1b	5.15047e-12	0.396471	0.354	0.107	1.66283e-07	Yif1b
Adam33	5.15279e-12	0.494331	0.569	0.285	1.66358e-07	Adam33
Cd164	7.57817e-12	0.437045	0.837	0.57	2.44661e-07	Cd164
H3f3a	7.61307e-12	0.41173	0.98	0.793	2.45788e-07	H3f3a
Elob	8.05617e-12	0.416224	0.963	0.682	2.60093e-07	Elob
Rsrp1	8.40089e-12	0.44871	0.844	0.521	2.71223e-07	Rsrp1
Pid1	8.99618e-12	0.537769	0.47	0.202	2.90442e-07	Pid1
Zfp871	9.15634e-12	0.468773	0.501	0.219	2.95612e-07	Zfp871
Tram1	1.1292e-11	0.385489	0.769	0.459	3.64561e-07	Tram1
Mat2a	1.13436e-11	0.554618	0.743	0.421	3.66228e-07	Mat2a
Copb2	1.3071e-11	0.499065	0.653	0.364	4.21997e-07	Copb2
Ar	1.62843e-11	0.541295	0.93	0.855	5.25738e-07	Ar
Aldh1a1	1.65407e-11	0.339908	0.429	0.157	5.34016e-07	Aldh1a1
Adamtsl1	1.88691e-11	0.487613	0.69	0.393	6.09188e-07	Adamtsl1
Rpl28	2.09851e-11	0.34184	0.998	0.93	6.77503e-07	Rpl28
Eef1b2	2.37565e-11	0.307435	0.991	0.86	7.6698e-07	Eef1b2
Kdelr2	2.5368e-11	0.42311	0.738	0.421	8.19007e-07	Kdelr2
Ppic	2.76221e-11	0.412593	0.743	0.413	8.9178e-07	Ppic
Akr1c18	3.04745e-11	0.696039	0.505	0.227	9.83871e-07	Akr1c18
Rcn3	3.60277e-11	0.467989	0.769	0.45	1.16316e-06	Rcn3
Hba-a1	3.67673e-11	1.32815	0.275	0.062	1.18703e-06	Hba-a1
Maged1	3.68302e-11	0.386094	0.71	0.384	1.18906e-06	Maged1
Calcrl	3.74514e-11	0.484814	0.71	0.393	1.20912e-06	Calcrl
Mmp14	3.75414e-11	-0.88558	0.848	0.814	1.21202e-06	Mmp14
Kdelr3	3.77107e-11	0.47806	0.387	0.149	1.21749e-06	Kdelr3
Efna5	4.06959e-11	0.442574	0.484	0.207	1.31387e-06	Efna5
Cygb	4.13942e-11	-0.893791	0.246	0.459	1.33641e-06	Cygb
Dmkn	4.25051e-11	-1.29109	0.206	0.388	1.37228e-06	Dmkn
0610010K14Rik	4.79436e-11	0.423879	0.369	0.124	1.54786e-06	0610010K14Rik
Rheb	5.14094e-11	0.376408	0.583	0.281	1.65975e-06	Rheb
Prkg2	7.11627e-11	0.463662	0.497	0.219	2.29749e-06	Prkg2
Rpl32	7.36116e-11	0.322531	0.998	0.946	2.37655e-06	Rpl32
Rpl15	7.56582e-11	0.321616	0.996	0.893	2.44263e-06	Rpl15
Aldh7a1	8.06356e-11	0.371432	0.543	0.248	2.60332e-06	Aldh7a1
Tmed9	8.69095e-11	0.421314	0.743	0.43	2.80587e-06	Tmed9
Vdac3	8.99832e-11	0.37121	0.723	0.417	2.90511e-06	Vdac3
Tra2a	9.75124e-11	0.429364	0.563	0.281	3.14819e-06	Tra2a
Lars2	1.03747e-10	-0.568691	0.963	0.913	3.34948e-06	Lars2
Igfbp6	1.07854e-10	0.355156	0.987	0.971	3.48206e-06	Igfbp6
Rbbp4	1.0901e-10	0.370815	0.488	0.207	3.51939e-06	Rbbp4
Ssr4	1.20179e-10	0.444088	0.765	0.459	3.87996e-06	Ssr4
mt-Nd3	1.2083e-10	0.344952	0.965	0.818	3.90099e-06	mt-Nd3
Hmgn3	1.22069e-10	0.420306	0.565	0.281	3.94101e-06	Hmgn3
Fxyd5	1.39061e-10	-0.495357	0.055	0.198	4.48958e-06	Fxyd5
Fndc1	1.45455e-10	0.429349	0.971	0.798	4.69602e-06	Fndc1
Ppp2r2b	1.47822e-10	0.385772	0.27	0.066	4.77242e-06	Ppp2r2b
Sema3b	1.60647e-10	0.398914	0.393	0.149	5.1865e-06	Sema3b
Pnp	1.62158e-10	0.589422	0.64	0.36	5.23526e-06	Pnp
Ogt	1.69874e-10	0.404225	0.615	0.31	5.48437e-06	Ogt
B2m	1.74201e-10	-0.511042	0.978	0.955	5.62408e-06	B2m
Sec62	1.79763e-10	0.381582	0.91	0.636	5.80365e-06	Sec62
Btg2	1.87878e-10	0.835983	0.475	0.24	6.06564e-06	Btg2
Anxa3	1.9808e-10	0.46153	0.892	0.736	6.39502e-06	Anxa3
Fbn2	2.3357e-10	0.314202	0.167	0.008	7.5408e-06	Fbn2
Mast4	2.38543e-10	0.414913	0.424	0.182	7.70135e-06	Mast4
Tek	2.84146e-10	0.386389	0.694	0.401	9.17364e-06	Tek
Fbxw8	2.91263e-10	0.286156	0.338	0.107	9.40344e-06	Fbxw8
Asap1	3.22461e-10	0.406272	0.607	0.31	1.04106e-05	Asap1
Pnisr	3.33514e-10	0.302775	0.6	0.306	1.07675e-05	Pnisr
Tmem59	3.75635e-10	0.431311	0.802	0.545	1.21274e-05	Tmem59
Mir100hg	3.77597e-10	0.488674	0.565	0.298	1.21907e-05	Mir100hg
Lgals1	4.08931e-10	0.296394	0.991	0.868	1.32023e-05	Lgals1
Ndufa4	4.56492e-10	0.351083	0.906	0.661	1.47378e-05	Ndufa4
Fus	4.83259e-10	0.31622	0.868	0.583	1.5602e-05	Fus
Ckb	5.00238e-10	0.384689	0.714	0.397	1.61502e-05	Ckb
Rab38	5.63303e-10	0.383237	0.334	0.112	1.81862e-05	Rab38
Rpl7a	5.9399e-10	0.351756	0.98	0.818	1.9177e-05	Rpl7a
Ndufs7	6.31023e-10	0.368767	0.598	0.31	2.03726e-05	Ndufs7
Rps3a1	6.48979e-10	0.25174	1	0.971	2.09523e-05	Rps3a1
9930111J21Rik2	6.6775e-10	-0.488905	0.042	0.169	2.15583e-05	9930111J21Rik2
Arpc1a	7.95191e-10	0.343755	0.6	0.302	2.56728e-05	Arpc1a
Dad1	8.06043e-10	0.388059	0.818	0.512	2.60231e-05	Dad1
Higd1a	8.09559e-10	0.340045	0.453	0.194	2.61366e-05	Higd1a
Col14a1	9.01642e-10	0.355158	0.972	0.88	2.91095e-05	Col14a1
Mt2	9.6235e-10	-0.917734	0.607	0.686	3.10695e-05	Mt2
Rpl18a	9.83975e-10	0.294447	0.998	0.934	3.17676e-05	Rpl18a
Tma7	1.02698e-09	0.36036	0.828	0.521	3.31561e-05	Tma7
Ccnd3	1.06691e-09	0.377255	0.554	0.289	3.44452e-05	Ccnd3
Clk1	1.07741e-09	0.347225	0.528	0.248	3.47843e-05	Clk1
Cd55	1.14148e-09	-0.838304	0.776	0.74	3.68527e-05	Cd55
Lama4	1.14604e-09	0.409815	0.772	0.521	3.7e-05	Lama4
Ost4	1.17382e-09	0.404382	0.807	0.517	3.78969e-05	Ost4
Pcolce	1.22515e-09	0.451745	0.76	0.467	3.95539e-05	Pcolce
Alcam	1.24094e-09	0.365005	0.231	0.05	4.00637e-05	Alcam
Chmp2a	1.25711e-09	0.417958	0.688	0.413	4.05856e-05	Chmp2a
Gng10	1.29558e-09	0.316659	0.637	0.355	4.18277e-05	Gng10
Ifitm2	1.29628e-09	0.297516	0.989	0.793	4.18505e-05	Ifitm2
Pxdn	1.30043e-09	0.361203	0.53	0.252	4.19845e-05	Pxdn
Tecr	1.35033e-09	0.36044	0.506	0.248	4.35953e-05	Tecr
Erp29	1.506e-09	0.400525	0.681	0.417	4.86211e-05	Erp29
Ppp1r14b	1.55463e-09	0.425642	0.938	0.785	5.01911e-05	Ppp1r14b
Bmp7	1.64138e-09	0.394436	0.371	0.14	5.29919e-05	Bmp7
Rab2a	1.67015e-09	0.381758	0.835	0.562	5.39208e-05	Rab2a
Rpn2	1.68019e-09	0.396569	0.793	0.496	5.4245e-05	Rpn2
Ext1	2.08365e-09	0.429836	0.606	0.343	6.72707e-05	Ext1
Mrfap1	2.10566e-09	0.343697	0.835	0.579	6.79813e-05	Mrfap1
Tram2	2.15976e-09	0.276146	0.327	0.112	6.9728e-05	Tram2
Col6a2	2.17116e-09	0.339139	0.936	0.698	7.00958e-05	Col6a2
Abca9	2.29725e-09	0.348231	0.582	0.31	7.41667e-05	Abca9
Cd302	2.33108e-09	0.349269	0.67	0.397	7.5259e-05	Cd302
Ssr2	2.34127e-09	0.381341	0.589	0.314	7.5588e-05	Ssr2
Adcy7	2.37266e-09	0.288459	0.229	0.05	7.66014e-05	Adcy7
Uqcc2	2.46023e-09	0.391602	0.87	0.628	7.94286e-05	Uqcc2
mt-Atp8	2.70908e-09	-0.714863	0.574	0.624	8.74625e-05	mt-Atp8
Nupr1	2.74725e-09	0.375099	0.837	0.541	8.86949e-05	Nupr1
Myl12b	2.75123e-09	0.312162	0.815	0.5	8.88234e-05	Myl12b
Rtn1	2.92341e-09	-0.469999	0.033	0.145	9.43822e-05	Rtn1
Kcnj8	2.99256e-09	0.357445	0.194	0.033	9.66149e-05	Kcnj8
Bsg	3.11246e-09	0.367407	0.892	0.616	0.000100486	Bsg
Arhgap20	3.57841e-09	0.384455	0.736	0.471	0.000115529	Arhgap20
Col6a6	3.59859e-09	0.261011	0.525	0.231	0.00011618	Col6a6
Crip2	3.75801e-09	-0.66839	0.31	0.467	0.000121327	Crip2
Copa	3.84356e-09	0.361995	0.741	0.467	0.000124089	Copa
Fam171b	4.2426e-09	0.371847	0.431	0.19	0.000136972	Fam171b
Pla2g4a	4.56998e-09	0.373528	0.442	0.202	0.000147542	Pla2g4a
Atraid	4.58459e-09	0.273964	0.596	0.318	0.000148013	Atraid
Cox7a2	4.84257e-09	0.293697	0.829	0.529	0.000156342	Cox7a2
Fgl2	5.0333e-09	0.617179	0.462	0.215	0.0001625	Fgl2
Fkbp7	5.1348e-09	0.421843	0.55	0.302	0.000165777	Fkbp7
Polr2j	5.15502e-09	0.340567	0.448	0.202	0.00016643	Polr2j
Srgap1	5.16109e-09	0.29301	0.45	0.198	0.000166626	Srgap1
Rps19	5.36184e-09	0.259934	0.998	0.971	0.000173107	Rps19
Ctsk	5.58158e-09	0.410608	0.703	0.405	0.000180201	Ctsk
Vldlr	5.89933e-09	0.314258	0.565	0.302	0.00019046	Vldlr
Loxl1	5.95797e-09	0.29482	0.947	0.806	0.000192353	Loxl1
Igfbp5	6.0945e-09	-0.483753	0.98	0.983	0.000196761	Igfbp5
Filip1l	6.82275e-09	0.341446	0.497	0.248	0.000220273	Filip1l
Lurap1l	6.95935e-09	0.373416	0.466	0.215	0.000224683	Lurap1l
Scn7a	7.22554e-09	0.420108	0.639	0.368	0.000233277	Scn7a
Creb5	7.68712e-09	0.414532	0.853	0.64	0.000248179	Creb5
Morf4l1	7.71867e-09	0.33825	0.976	0.793	0.000249197	Morf4l1
Emb	8.13333e-09	-0.520881	0.086	0.231	0.000262584	Emb
Eprs	8.53223e-09	0.342751	0.657	0.36	0.000275463	Eprs
Matr3	8.53545e-09	0.330425	0.572	0.306	0.000275567	Matr3
Aox3	8.9288e-09	-0.367881	0.02	0.116	0.000288266	Aox3
Ccdc28b	9.06886e-09	0.313026	0.277	0.087	0.000292788	Ccdc28b
Tceal9	9.3088e-09	0.343573	0.767	0.496	0.000300535	Tceal9
Eif3h	9.68384e-09	0.267796	0.778	0.446	0.000312643	Eif3h
Smim14	9.90489e-09	0.34111	0.818	0.537	0.000319779	Smim14
Man2a1	9.92808e-09	0.439085	0.78	0.529	0.000320528	Man2a1
Abcc9	1.04667e-08	0.327014	0.222	0.05	0.000337918	Abcc9
Copz2	1.06389e-08	0.335382	0.576	0.306	0.000343475	Copz2
Sec61a1	1.07024e-08	0.298844	0.611	0.335	0.000345527	Sec61a1
Pla1a	1.09738e-08	-0.880248	0.257	0.397	0.000354289	Pla1a
Cd81	1.22136e-08	0.307262	0.956	0.76	0.000394315	Cd81
Ccn3	1.26014e-08	-0.911148	0.681	0.719	0.000406835	Ccn3
Sec13	1.30859e-08	0.361555	0.461	0.231	0.000422477	Sec13
Eln	1.35352e-08	0.520692	0.749	0.479	0.000436984	Eln
Ybx3	1.37711e-08	0.340859	0.936	0.736	0.000444599	Ybx3
Nptn	1.4013e-08	0.371959	0.811	0.517	0.000452409	Nptn
Acaa2	1.4914e-08	0.375652	0.517	0.264	0.000481498	Acaa2
Dnajb11	1.51996e-08	0.361381	0.468	0.24	0.00049072	Dnajb11
Cst3	1.56758e-08	0.339037	0.972	0.719	0.000506095	Cst3
Gstm1	1.57429e-08	0.334126	0.945	0.727	0.000508258	Gstm1
Fau	1.57456e-08	0.261245	0.996	0.967	0.000508346	Fau
Bmp3	1.69603e-08	0.334878	0.637	0.368	0.000547564	Bmp3
Atp5d	1.76133e-08	0.301842	0.804	0.483	0.000568645	Atp5d
Sec61b	2.06368e-08	0.358905	0.916	0.665	0.000666259	Sec61b
Rabac1	2.12028e-08	0.388736	0.888	0.64	0.000684532	Rabac1
Snhg11	2.28352e-08	-0.365026	0.024	0.12	0.000737233	Snhg11
Sri	2.28586e-08	0.269503	0.717	0.413	0.000737989	Sri
Ube2m	2.39254e-08	0.324415	0.475	0.244	0.000772432	Ube2m
Gm10115	2.39968e-08	0.323878	0.387	0.161	0.000774738	Gm10115
Map1lc3a	2.54924e-08	0.287733	0.727	0.426	0.000823023	Map1lc3a
Rraga	2.74454e-08	0.282133	0.411	0.186	0.000886074	Rraga
Foxp2	2.75783e-08	0.328462	0.45	0.215	0.000890364	Foxp2
Tle5	2.83625e-08	0.343892	0.879	0.603	0.000915683	Tle5
Gaa	2.92544e-08	0.337565	0.424	0.194	0.000944478	Gaa
Pamr1	3.02551e-08	0.402115	0.706	0.438	0.000976786	Pamr1
Arsi	3.09471e-08	0.345374	0.477	0.244	0.000999128	Arsi
Cyb5a	3.109e-08	0.361332	0.905	0.674	0.00100374	Cyb5a
Sec31a	3.21338e-08	0.326782	0.76	0.467	0.00103744	Sec31a
Ldlr	3.30684e-08	0.353231	0.246	0.074	0.00106761	Ldlr
Ppa1	3.34685e-08	0.27531	0.499	0.244	0.00108053	Ppa1
Cic	3.66273e-08	0.271339	0.306	0.112	0.00118251	Cic
Tpst1	3.81335e-08	0.29502	0.479	0.24	0.00123114	Tpst1
Slirp	4.2433e-08	0.306918	0.444	0.215	0.00136995	Slirp
Adam23	4.51961e-08	0.351523	0.327	0.128	0.00145915	Adam23
Myl9	4.62591e-08	0.344642	0.185	0.037	0.00149348	Myl9
Twsg1	4.63083e-08	0.35625	0.721	0.459	0.00149506	Twsg1
Jpt1	4.9398e-08	0.31349	0.776	0.541	0.00159481	Jpt1
Tent5a	4.97384e-08	0.296223	0.446	0.211	0.00160581	Tent5a
Eef1g	4.99122e-08	0.288009	0.899	0.64	0.00161142	Eef1g
Lrpap1	5.015e-08	0.28279	0.492	0.244	0.00161909	Lrpap1
Srpx	5.04706e-08	0.31278	0.345	0.14	0.00162944	Srpx
Tbrg1	5.16162e-08	0.371029	0.736	0.488	0.00166643	Tbrg1
Rcn1	5.4412e-08	0.318643	0.664	0.401	0.00175669	Rcn1
Prdx4	5.67476e-08	0.303579	0.36	0.149	0.0018321	Prdx4
Klhl13	6.06042e-08	0.258866	0.519	0.256	0.00195661	Klhl13
Mrpl20	6.49457e-08	0.335095	0.528	0.285	0.00209677	Mrpl20
Etv1	6.55318e-08	-0.37476	0.033	0.132	0.0021157	Etv1
Gpx7	6.67391e-08	0.294394	0.453	0.211	0.00215467	Gpx7
Ube2e1	6.69183e-08	0.340326	0.406	0.198	0.00216046	Ube2e1
Paip2	6.81367e-08	0.320516	0.673	0.413	0.00219979	Paip2
Trio	6.8461e-08	0.355814	0.776	0.529	0.00221026	Trio
Glmp	6.87933e-08	0.282515	0.336	0.136	0.00222099	Glmp
Snhg18	6.91816e-08	0.422632	0.703	0.446	0.00223353	Snhg18
Rps10	7.0369e-08	0.258473	1	0.975	0.00227186	Rps10
Setd5	7.06281e-08	0.3308	0.453	0.231	0.00228023	Setd5
Sumo2	7.29792e-08	0.354117	0.868	0.645	0.00235613	Sumo2
Eif4a2	7.58545e-08	0.297007	0.727	0.442	0.00244896	Eif4a2
Ikbip	8.06276e-08	0.331839	0.558	0.302	0.00260306	Ikbip
Ube2e2	8.19939e-08	0.306631	0.367	0.161	0.00264717	Ube2e2
Nsg1	8.68579e-08	-0.620827	0.213	0.36	0.00280421	Nsg1
Ranbp1	8.70122e-08	0.3543	0.565	0.326	0.00280919	Ranbp1
Pofut2	8.86019e-08	0.317492	0.415	0.202	0.00286051	Pofut2
E130102H24Rik	9.4393e-08	0.263474	0.222	0.062	0.00304748	E130102H24Rik
Pcdh20	9.54115e-08	0.268138	0.134	0.012	0.00308036	Pcdh20
Sdf2l1	9.59226e-08	0.329646	0.389	0.174	0.00309686	Sdf2l1
Esr1	9.80991e-08	0.310662	0.446	0.219	0.00316713	Esr1
Cryab	9.83828e-08	0.391572	0.431	0.211	0.00317629	Cryab
Gnaq	1.01309e-07	0.270317	0.473	0.236	0.00327077	Gnaq
Dnajb4	1.10129e-07	0.296954	0.24	0.074	0.00355551	Dnajb4
Prorsd1	1.1188e-07	0.267684	0.283	0.099	0.00361204	Prorsd1
Coa3	1.16757e-07	0.263491	0.552	0.298	0.0037695	Coa3
Chchd2	1.25793e-07	0.250478	0.987	0.843	0.00406122	Chchd2
Adk	1.31959e-07	0.27199	0.462	0.236	0.0042603	Adk
Sec24d	1.32684e-07	0.274327	0.396	0.182	0.00428371	Sec24d
Cercam	1.32736e-07	0.307571	0.339	0.145	0.00428538	Cercam
Copg1	1.34197e-07	0.29309	0.477	0.248	0.00433256	Copg1
Mmp16	1.35015e-07	0.271413	0.149	0.021	0.00435897	Mmp16
P4ha1	1.36616e-07	0.277773	0.549	0.293	0.00441064	P4ha1
Cox7b	1.43325e-07	0.340888	0.818	0.554	0.00462725	Cox7b
Park7	1.43579e-07	0.337674	0.736	0.467	0.00463545	Park7
Ei24	1.46648e-07	0.303162	0.38	0.174	0.00473454	Ei24
Prrc1	1.47651e-07	0.316257	0.571	0.318	0.00476692	Prrc1
Ugp2	1.47763e-07	0.321846	0.703	0.467	0.00477054	Ugp2
Gns	1.48546e-07	0.292213	0.591	0.347	0.00479579	Gns
Enah	1.51583e-07	0.268676	0.281	0.103	0.00489387	Enah
Ddx3x	1.56204e-07	0.344429	0.839	0.591	0.00504304	Ddx3x
Chst1	1.5807e-07	-0.646571	0.323	0.455	0.0051033	Chst1
Ech1	1.83227e-07	0.283028	0.457	0.223	0.00591548	Ech1
Tbc1d8b	1.85942e-07	0.261541	0.191	0.05	0.00600315	Tbc1d8b
Metrnl	1.87989e-07	0.378038	0.752	0.504	0.00606922	Metrnl
Rbm5	1.99032e-07	0.278628	0.514	0.277	0.00642575	Rbm5
D8Ertd738e	1.99103e-07	0.302225	0.756	0.471	0.00642804	D8Ertd738e
Fbxl7	2.17404e-07	0.266944	0.264	0.095	0.00701888	Fbxl7
Fer	2.21158e-07	0.260004	0.492	0.264	0.0071401	Fer
Lpp	2.2224e-07	0.301197	0.829	0.616	0.00717502	Lpp
Rrbp1	2.25948e-07	0.292278	0.967	0.76	0.00729474	Rrbp1
Tubb4b	2.2753e-07	0.284665	0.571	0.314	0.00734581	Tubb4b
Hnrnpr	2.2874e-07	0.301437	0.56	0.318	0.00738487	Hnrnpr
Tm9sf4	2.31774e-07	0.300376	0.47	0.252	0.00748281	Tm9sf4
Mrps24	2.32774e-07	0.307718	0.617	0.355	0.0075151	Mrps24
Atf7ip	2.46672e-07	0.29969	0.358	0.157	0.0079638	Atf7ip
Galnt15	2.61487e-07	-0.674372	0.268	0.401	0.00844212	Galnt15
Ctsh	2.70911e-07	0.369054	0.36	0.165	0.00874636	Ctsh
Fubp1	2.71146e-07	0.279267	0.453	0.227	0.00875394	Fubp1
Atp5j	2.75938e-07	0.341489	0.839	0.562	0.00890867	Atp5j
Tceal8	2.7976e-07	0.302907	0.594	0.326	0.00903205	Tceal8
Rsu1	2.85425e-07	0.283109	0.578	0.335	0.00921495	Rsu1
Oxct1	2.94641e-07	0.315353	0.637	0.376	0.0095125	Oxct1
Fads1	3.08016e-07	0.313283	0.242	0.083	0.0099443	Fads1
Arrdc3	3.1239e-07	0.277692	0.411	0.194	0.0100855	Arrdc3
Timm10b	3.18882e-07	0.323244	0.585	0.351	0.0102951	Timm10b
St3gal1	3.22306e-07	0.269786	0.486	0.244	0.0104057	St3gal1
Pcdh9	3.24558e-07	0.270519	0.317	0.128	0.0104783	Pcdh9
Ddx24	3.24981e-07	0.31085	0.527	0.285	0.010492	Ddx24
Tasor	3.35591e-07	0.292191	0.501	0.264	0.0108346	Tasor
Psmb1	3.7114e-07	0.327061	0.727	0.455	0.0119822	Psmb1
Pi16	3.72188e-07	0.380764	0.928	0.831	0.0120161	Pi16
Tmem167	3.74959e-07	0.329464	0.642	0.393	0.0121055	Tmem167
Hexb	3.81556e-07	0.273355	0.439	0.219	0.0123185	Hexb
Trf	4.06509e-07	0.342144	0.272	0.103	0.0131242	Trf
Sh3pxd2b	4.37529e-07	0.274178	0.572	0.318	0.0141256	Sh3pxd2b
Nbeal1	4.434e-07	0.293237	0.55	0.31	0.0143152	Nbeal1
Psma3	4.51912e-07	0.284667	0.692	0.43	0.01459	Psma3
Islr	4.54502e-07	0.32504	0.87	0.653	0.0146736	Islr
Creb3l1	4.54687e-07	0.319274	0.62	0.364	0.0146796	Creb3l1
Cyp1b1	4.63254e-07	-0.554496	0.105	0.231	0.0149562	Cyp1b1
Slc38a10	4.77566e-07	0.309706	0.517	0.289	0.0154182	Slc38a10
Slc4a10	4.87548e-07	0.253508	0.209	0.062	0.0157405	Slc4a10
Lamtor1	4.89303e-07	0.309021	0.382	0.186	0.0157971	Lamtor1
Maged2	4.91651e-07	0.274289	0.391	0.194	0.015873	Maged2
Gm26782	5.01097e-07	0.259975	0.224	0.07	0.0161779	Gm26782
Itgb7	5.11306e-07	-0.514944	0.046	0.145	0.0165075	Itgb7
Akap9	5.16574e-07	0.273041	0.481	0.256	0.0166776	Akap9
Mmp3	5.17303e-07	-0.39951	0.081	0.207	0.0167011	Mmp3
Sgce	5.22809e-07	0.310277	0.55	0.326	0.0168789	Sgce
Rps28	5.43846e-07	-0.275492	1	0.992	0.0175581	Rps28
Galnt1	5.45291e-07	0.272424	0.772	0.488	0.0176047	Galnt1
Lamp2	5.4554e-07	0.337674	0.912	0.715	0.0176128	Lamp2
0610012G03Rik	5.46383e-07	0.287012	0.47	0.252	0.01764	0610012G03Rik
Rpl31	5.54237e-07	0.266578	0.982	0.839	0.0178936	Rpl31
Loxl2	5.54283e-07	0.261548	0.723	0.488	0.017895	Loxl2
Nktr	5.59491e-07	0.306092	0.703	0.426	0.0180632	Nktr
Cp	5.61222e-07	0.281289	0.262	0.095	0.018119	Cp
Ddx5	5.7013e-07	0.306803	0.963	0.802	0.0184066	Ddx5
Prdx1	5.70896e-07	0.303544	0.932	0.719	0.0184314	Prdx1
Zfp950	5.72039e-07	0.27372	0.31	0.128	0.0184683	Zfp950
Krtcap2	5.84795e-07	0.325526	0.897	0.678	0.0188801	Krtcap2
Adamts1	5.88996e-07	0.406427	0.437	0.236	0.0190157	Adamts1
Arl1	6.22607e-07	0.288515	0.717	0.475	0.0201009	Arl1
Hbb-bt	6.27951e-07	0.707851	0.24	0.079	0.0202734	Hbb-bt
Mrpl27	6.72217e-07	0.276814	0.358	0.165	0.0217025	Mrpl27
Dock7	6.73896e-07	0.268783	0.602	0.372	0.0217567	Dock7
C1qtnf2	6.75657e-07	0.318945	0.338	0.157	0.0218136	C1qtnf2
Chic2	6.96901e-07	0.263362	0.53	0.293	0.0224995	Chic2
Psmd12	7.0094e-07	0.309688	0.367	0.182	0.0226298	Psmd12
Mef2a	7.02731e-07	0.289485	0.503	0.277	0.0226877	Mef2a
Ano3	7.18215e-07	0.266668	0.259	0.095	0.0231876	Ano3
Ufc1	7.36411e-07	0.282268	0.609	0.347	0.023775	Ufc1
Arl3	7.58e-07	0.305776	0.495	0.285	0.024472	Arl3
Atp6v0e	8.0393e-07	0.272602	0.714	0.426	0.0259549	Atp6v0e
Fasn	8.10352e-07	0.28409	0.279	0.112	0.0261622	Fasn
Rock2	8.32896e-07	-0.473396	0.888	0.818	0.02689	Rock2
Plxna1	8.91098e-07	0.306114	0.532	0.302	0.0287691	Plxna1
Cgrrf1	9.02574e-07	0.259838	0.25	0.095	0.0291396	Cgrrf1
Tmed3	9.19854e-07	0.2836	0.807	0.545	0.0296975	Tmed3
Cited2	9.27449e-07	0.416021	0.561	0.335	0.0299427	Cited2
Basp1	9.7449e-07	0.308179	0.782	0.525	0.0314614	Basp1
Rhoj	1.00024e-06	0.293621	0.822	0.562	0.0322928	Rhoj
Synm	1.01372e-06	-0.253238	0.029	0.116	0.032728	Synm
Timm23	1.03077e-06	0.271347	0.396	0.198	0.0332783	Timm23
Errfi1	1.03694e-06	0.512534	0.717	0.529	0.0334775	Errfi1
Fgf7	1.05605e-06	0.252088	0.295	0.12	0.0340946	Fgf7
Rer1	1.09154e-06	0.272062	0.622	0.376	0.0352405	Rer1
Gapdh	1.11431e-06	0.273482	0.828	0.558	0.0359756	Gapdh
Igsf10	1.14571e-06	0.28095	0.428	0.219	0.0369893	Igsf10
Egfr	1.21222e-06	0.268792	0.51	0.293	0.0391364	Egfr
Gpx8	1.2332e-06	0.258267	0.683	0.426	0.0398138	Gpx8
Txndc9	1.23845e-06	0.276888	0.407	0.211	0.0399834	Txndc9
Ppl	1.26141e-06	-0.568032	0.121	0.248	0.0407247	Ppl
Polr2f	1.26294e-06	0.266752	0.6	0.355	0.0407741	Polr2f
Iah1	1.28375e-06	0.281966	0.418	0.215	0.0414458	Iah1
Stub1	1.29978e-06	0.287054	0.591	0.351	0.0419635	Stub1
Arcn1	1.39427e-06	0.307361	0.655	0.409	0.0450142	Arcn1
Hacd1	1.49998e-06	0.274322	0.299	0.128	0.0484269	Hacd1
Stt3a	1.50179e-06	0.300811	0.578	0.343	0.0484854	Stt3a
Rab1a	1.50839e-06	0.260035	0.666	0.413	0.0486984	Rab1a
Psmb5	1.56555e-06	0.258998	0.552	0.318	0.0505437	Psmb5
Txndc15	1.60889e-06	0.258755	0.349	0.165	0.051943	Txndc15
Akr1b3	1.61661e-06	0.262925	0.455	0.24	0.0521922	Akr1b3
Lman1	1.66387e-06	0.294983	0.626	0.388	0.0537179	Lman1
Akr1b8	1.66485e-06	0.287489	0.354	0.174	0.0537498	Akr1b8
Dapk1	1.71445e-06	0.296895	0.839	0.607	0.055351	Dapk1
Sar1a	1.74163e-06	0.30953	0.716	0.475	0.0562286	Sar1a
Col4a5	1.76279e-06	0.251059	0.229	0.079	0.0569116	Col4a5
Atp2b1	1.76422e-06	0.304678	0.839	0.636	0.0569579	Atp2b1
Naxe	1.79194e-06	0.25103	0.35	0.165	0.0578527	Naxe
AW112010	1.88588e-06	-0.300925	0.081	0.194	0.0608856	AW112010
Atxn10	1.90705e-06	0.291702	0.611	0.36	0.0615691	Atxn10
Snrpd2	1.9332e-06	0.31341	0.719	0.479	0.0624134	Snrpd2
Zmat5	1.95181e-06	0.257554	0.25	0.099	0.0630143	Zmat5
Tubb6	1.95312e-06	0.31429	0.591	0.364	0.0630566	Tubb6
Atpif1	1.96525e-06	0.262192	0.8	0.537	0.0634482	Atpif1
Neat1	1.98067e-06	0.508878	0.802	0.599	0.0639459	Neat1
Man2b1	2.00149e-06	0.282122	0.306	0.14	0.0646181	Man2b1
Uchl1	2.04312e-06	0.300837	0.539	0.322	0.0659621	Uchl1
Fndc3b	2.07867e-06	0.270848	0.754	0.558	0.0671099	Fndc3b
Manf	2.13053e-06	0.31298	0.743	0.5	0.0687841	Manf
Zfand6	2.39942e-06	0.259163	0.532	0.298	0.0774652	Zfand6
Ifi207	2.56004e-06	0.270282	0.593	0.36	0.0826508	Ifi207
Mgst1	2.75235e-06	0.277108	0.872	0.645	0.0888596	Mgst1
Tet1	2.87828e-06	0.254077	0.141	0.029	0.0929251	Tet1
Ccnd2	2.90432e-06	0.308611	0.583	0.364	0.0937659	Ccnd2
Slc25a4	2.9248e-06	0.296128	0.884	0.636	0.0944272	Slc25a4
Nav3	3.00779e-06	0.282614	0.382	0.194	0.0971066	Nav3
Slc25a39	3.07205e-06	0.290553	0.383	0.198	0.0991811	Slc25a39
Scfd1	3.07652e-06	0.257602	0.352	0.169	0.0993253	Scfd1
Stoml2	3.1169e-06	0.252902	0.228	0.083	0.100629	Stoml2
Scmh1	3.36405e-06	0.263726	0.283	0.124	0.108608	Scmh1
Mrpl18	3.38221e-06	0.254013	0.352	0.178	0.109195	Mrpl18
Egr1	3.41375e-06	0.486318	0.76	0.653	0.110213	Egr1
Ppp1r15a	3.53145e-06	0.386005	0.413	0.227	0.114013	Ppp1r15a
Vcan	3.53821e-06	-0.639159	0.437	0.517	0.114231	Vcan
Fosb	3.54452e-06	0.631797	0.611	0.438	0.114435	Fosb
Ramp2	3.6436e-06	0.323598	0.712	0.492	0.117634	Ramp2
Gpr153	3.87936e-06	0.266917	0.332	0.161	0.125245	Gpr153
Thbs2	3.95428e-06	0.412844	0.673	0.455	0.127664	Thbs2
Lrp6	4.01441e-06	0.269028	0.585	0.335	0.129605	Lrp6
1700019D03Rik	4.0527e-06	0.289528	0.65	0.401	0.130841	1700019D03Rik
Capzb	4.06388e-06	0.253846	0.728	0.463	0.131202	Capzb
Fbn1	4.21866e-06	0.262983	0.98	0.926	0.136199	Fbn1
Rpl36al	4.23891e-06	0.267666	0.971	0.764	0.136853	Rpl36al
Selenom	4.32214e-06	0.284066	0.941	0.682	0.13954	Selenom
Gabarap	4.33443e-06	0.264788	0.982	0.835	0.139937	Gabarap
Tmem258	4.35186e-06	0.315521	0.723	0.483	0.1405	Tmem258
Npc2	4.38974e-06	-0.412304	0.912	0.835	0.141723	Npc2
Hic1	4.65664e-06	0.250404	0.33	0.161	0.15034	Hic1
Ginm1	4.79282e-06	0.259102	0.464	0.256	0.154736	Ginm1
Ap2s1	4.83659e-06	0.259849	0.499	0.285	0.156149	Ap2s1
Pfn1	4.89779e-06	0.261148	0.888	0.665	0.158125	Pfn1
Mocs2	5.22051e-06	0.286767	0.466	0.273	0.168544	Mocs2
Atf3	5.238e-06	0.681261	0.319	0.161	0.169109	Atf3
Fxyd1	5.41459e-06	0.263163	0.846	0.57	0.17481	Fxyd1
Nrip1	5.49903e-06	0.312376	0.51	0.31	0.177536	Nrip1
Cthrc1	6.2785e-06	0.373481	0.33	0.169	0.202701	Cthrc1
Mtch1	6.31808e-06	0.27442	0.822	0.587	0.203979	Mtch1
Olfml2b	6.44481e-06	0.284944	0.763	0.545	0.208071	Olfml2b
Ttc14	6.68897e-06	0.281376	0.49	0.285	0.215953	Ttc14
Cdc42	6.80879e-06	0.255569	0.939	0.736	0.219822	Cdc42
Tmem147	6.81486e-06	0.25371	0.483	0.293	0.220018	Tmem147
Rcn2	7.65869e-06	0.259303	0.473	0.269	0.247261	Rcn2
2310039H08Rik	7.73721e-06	0.261166	0.297	0.14	0.249796	2310039H08Rik
Snx2	7.74844e-06	0.269029	0.451	0.256	0.250158	Snx2
Bnip3l	7.91389e-06	0.258364	0.78	0.537	0.2555	Bnip3l
Bri3	8.62833e-06	0.263758	0.806	0.541	0.278566	Bri3
Fbln5	8.92995e-06	0.269839	0.635	0.421	0.288303	Fbln5
Fkbp11	9.55297e-06	0.261164	0.229	0.091	0.308418	Fkbp11
Sppl3	1.08983e-05	0.261589	0.391	0.207	0.35185	Sppl3
Meis2	1.09116e-05	0.301714	0.437	0.26	0.35228	Meis2
Vit	1.17988e-05	-0.456918	0.182	0.306	0.380923	Vit
Ifi204	1.1976e-05	0.317336	0.75	0.533	0.386646	Ifi204
Helz	1.30807e-05	0.26248	0.398	0.219	0.42231	Helz
Grcc10	1.3968e-05	0.278157	0.745	0.5	0.450957	Grcc10
Jkamp	1.45296e-05	0.258303	0.306	0.157	0.469088	Jkamp
Hdlbp	1.51185e-05	0.270461	0.853	0.595	0.488102	Hdlbp
Etfa	1.5752e-05	0.272314	0.684	0.463	0.508553	Etfa
Ube2d3	1.85168e-05	0.269693	0.796	0.583	0.597814	Ube2d3
Ndufa5	1.86617e-05	0.250414	0.668	0.43	0.602492	Ndufa5
Lgi2	2.01296e-05	-0.441048	0.086	0.186	0.649884	Lgi2
Tmed10	2.03057e-05	0.254067	0.916	0.669	0.655571	Tmed10
Pik3r1	2.12021e-05	0.293421	0.719	0.492	0.684509	Pik3r1
Ccnl1	2.31067e-05	0.282695	0.453	0.264	0.746001	Ccnl1
C4b	2.9059e-05	-0.684899	0.154	0.269	0.938168	C4b
Adamtsl3	3.32099e-05	-0.29866	0.061	0.149	1	Adamtsl3
Psmb6	3.38306e-05	0.251019	0.545	0.339	1	Psmb6
Nfix	3.45706e-05	-0.35882	0.976	0.934	1	Nfix
Zic1	3.59138e-05	0.268862	0.479	0.293	1	Zic1
Kitl	3.67532e-05	-0.412463	0.224	0.343	1	Kitl
Thbs3	4.11975e-05	0.258116	0.376	0.211	1	Thbs3
Cd9	4.72059e-05	-0.427847	0.637	0.669	1	Cd9
Plac8	4.84138e-05	-0.640868	0.308	0.417	1	Plac8
Il13ra1	4.95012e-05	0.272213	0.727	0.541	1	Il13ra1
Socs3	5.37025e-05	0.413459	0.472	0.314	1	Socs3
Dstn	5.82299e-05	-0.384994	0.862	0.798	1	Dstn
Fbln2	6.04903e-05	-0.514282	0.771	0.74	1	Fbln2
C2	7.69242e-05	-0.447791	0.211	0.322	1	C2
Ifi205	8.02258e-05	0.309868	0.613	0.463	1	Ifi205
Mir22hg	8.32043e-05	0.250049	0.305	0.165	1	Mir22hg
Dnajc25	9.06563e-05	0.251308	0.305	0.161	1	Dnajc25
Glud1	9.61464e-05	-0.346176	0.822	0.789	1	Glud1
Rbpj	9.91572e-05	-0.332612	0.782	0.764	1	Rbpj
Gm12840	0.000110369	0.347449	0.132	0.041	1	Gm12840
Timp1	0.000115908	-0.39513	0.095	0.19	1	Timp1
Ier2	0.000120063	0.621737	0.554	0.442	1	Ier2
Gm26532	0.00012098	0.321416	0.345	0.202	1	Gm26532
Plat	0.000123282	0.268658	0.754	0.574	1	Plat
Dynlrb1	0.000155283	0.255065	0.859	0.661	1	Dynlrb1
Prnp	0.000175175	-0.380761	0.699	0.702	1	Prnp
Zfp36	0.000179022	0.575704	0.587	0.475	1	Zfp36
Mettl7a1	0.000201607	-0.390355	0.101	0.186	1	Mettl7a1
Anxa2	0.000213828	-0.386524	0.947	0.888	1	Anxa2
Ptp4a2	0.000214722	-0.381894	0.927	0.864	1	Ptp4a2
Emp1	0.000214964	-0.426901	0.519	0.574	1	Emp1
Apbb1ip	0.000269828	-0.41337	0.198	0.289	1	Apbb1ip
C1s1	0.000335006	-0.351684	0.818	0.789	1	C1s1
Rab3d	0.00040699	-0.354866	0.163	0.256	1	Rab3d
Pabpc1	0.000519704	-0.412204	0.846	0.806	1	Pabpc1
Fos	0.000587149	0.409328	0.743	0.657	1	Fos
Tspo	0.000676651	-0.486676	0.688	0.649	1	Tspo
Ecm1	0.000732012	0.255827	0.928	0.822	1	Ecm1
Lox	0.000769021	0.302807	0.349	0.211	1	Lox
Sh2d4a	0.000798601	-0.276139	0.061	0.128	1	Sh2d4a
Sptbn1	0.000821791	-0.259633	0.982	0.955	1	Sptbn1
Pafah1b1	0.000921833	-0.296359	0.774	0.719	1	Pafah1b1
Cav1	0.000961778	-0.312589	0.117	0.198	1	Cav1
Ptgs2	0.00120004	0.568959	0.248	0.14	1	Ptgs2
Chd3	0.00124748	-0.474005	0.383	0.434	1	Chd3
Nfe2l1	0.00140185	-0.387827	0.49	0.529	1	Nfe2l1
Igfbp7	0.0015513	-0.331134	0.231	0.335	1	Igfbp7
Gngt2	0.001564	-0.41713	0.521	0.533	1	Gngt2
Hes1	0.00159866	-0.628408	0.094	0.165	1	Hes1
Slco2a1	0.00165096	-0.535963	0.215	0.281	1	Slco2a1
Pltp	0.00181964	-0.356318	0.228	0.306	1	Pltp
Lmo4	0.00195191	-0.422796	0.288	0.347	1	Lmo4
Dact1	0.00197875	-0.671979	0.651	0.603	1	Dact1
H2-K1	0.00212219	-0.380093	0.846	0.789	1	H2-K1
Flrt2	0.00227938	-0.340998	0.771	0.731	1	Flrt2
Duox1	0.00229531	-0.337035	0.196	0.273	1	Duox1
Gas6	0.00230187	-0.293505	0.152	0.248	1	Gas6
Sned1	0.00235082	-0.710049	0.22	0.293	1	Sned1
Phlda3	0.0029944	-0.394524	0.178	0.252	1	Phlda3
Duoxa1	0.00310529	-0.338742	0.233	0.31	1	Duoxa1
Has1	0.00333042	0.459616	0.235	0.145	1	Has1
Foxp1	0.00388522	-0.433573	0.583	0.57	1	Foxp1
C3	0.00491183	-0.252723	0.895	0.921	1	C3
Dtx3l	0.00498555	-0.320569	0.136	0.202	1	Dtx3l
Fam98b	0.00503822	-0.268707	0.178	0.244	1	Fam98b
Ralbp1	0.0052453	-0.289547	0.739	0.694	1	Ralbp1
S100a9	0.00577305	-0.471694	0.409	0.426	1	S100a9
H19	0.00625288	0.407214	0.117	0.054	1	H19
Gm26917	0.00745053	-0.445285	0.435	0.467	1	Gm26917
Zfp36l1	0.00799254	0.280052	0.941	0.798	1	Zfp36l1
Arpc1b	0.00828912	-0.278347	0.844	0.727	1	Arpc1b
Tnfaip2	0.0082983	-0.349635	0.407	0.45	1	Tnfaip2
Maob	0.008532	-0.309262	0.121	0.182	1	Maob
Clip1	0.00855284	-0.423051	0.495	0.5	1	Clip1
Syne2	0.0088241	-0.441599	0.319	0.364	1	Syne2
Cep83	0.00901788	-0.267998	0.117	0.178	1	Cep83
Wwp1	0.00960076	-0.359213	0.383	0.426	1	Wwp1
Ntn4	0.0116249	-0.357975	0.385	0.421	1	Ntn4
Igfbp3	0.0120961	0.368958	0.222	0.136	1	Igfbp3
Vcam1	0.012724	-0.294475	0.143	0.198	1	Vcam1
Lmna	0.0140595	-0.574515	0.655	0.574	1	Lmna
Abca1	0.0143855	-0.329775	0.633	0.612	1	Abca1
Thbd	0.0149271	-0.319389	0.672	0.628	1	Thbd
Cd200	0.0154217	-0.32229	0.141	0.194	1	Cd200
Cbx3	0.0167298	-0.323852	0.754	0.686	1	Cbx3
Pdlim4	0.0184408	-0.30013	0.235	0.289	1	Pdlim4
Pim1	0.0193499	-0.426117	0.112	0.161	1	Pim1
Klc1	0.0201668	-0.384357	0.314	0.351	1	Klc1
Cxcl1	0.0205655	0.370455	0.198	0.128	1	Cxcl1
S100a8	0.0216519	-0.423202	0.389	0.405	1	S100a8
Mustn1	0.023005	-0.399297	0.536	0.529	1	Mustn1
Hdac7	0.0245319	-0.373635	0.681	0.636	1	Hdac7
Enpp2	0.0255682	-0.367246	0.145	0.194	1	Enpp2
Plxdc2	0.0257601	-0.282991	0.85	0.798	1	Plxdc2
Msx1	0.0269777	-0.32796	0.217	0.264	1	Msx1
Plaat3	0.0280842	-0.273126	0.207	0.256	1	Plaat3
Srgn	0.0294847	-0.26807	0.103	0.149	1	Srgn
Hivep1	0.0296238	-0.289891	0.15	0.198	1	Hivep1
Eif3a	0.0300956	-0.315839	0.747	0.669	1	Eif3a
Jcad	0.0319222	-0.32013	0.24	0.281	1	Jcad
Slfn5	0.0321696	-0.324827	0.739	0.661	1	Slfn5
Wipf1	0.0336691	-0.386699	0.527	0.517	1	Wipf1
Cxcl14	0.0336876	-0.345457	0.073	0.12	1	Cxcl14
Cdk11b	0.0343342	-0.32923	0.319	0.351	1	Cdk11b
2410006H16Rik	0.0350979	-0.362189	0.528	0.508	1	2410006H16Rik
Thy1	0.0368024	-0.265679	0.694	0.64	1	Thy1
Htra3	0.0387876	-0.257787	0.824	0.789	1	Htra3
Asap2	0.0456041	-0.270142	0.165	0.211	1	Asap2
Nbl1	0.0483886	-0.35064	0.846	0.727	1	Nbl1
Ifngr1	0.0497811	-0.311926	0.572	0.537	1	Ifngr1
Ece1	0.0544823	-0.323098	0.426	0.426	1	Ece1
Taok1	0.0551053	-0.295537	0.589	0.57	1	Taok1
Phlda1	0.0556481	-0.25901	0.317	0.364	1	Phlda1
Sp100	0.0563193	-0.286496	0.25	0.281	1	Sp100
Lgmn	0.0569615	-0.314226	0.206	0.24	1	Lgmn
Il1r1	0.062378	-0.297088	0.198	0.236	1	Il1r1
Afap1	0.0675141	-0.294261	0.435	0.442	1	Afap1
Baiap2	0.0702252	-0.295557	0.242	0.273	1	Baiap2
Ppp3ca	0.0707784	-0.345906	0.444	0.446	1	Ppp3ca
Aif1l	0.0737954	-0.305137	0.532	0.517	1	Aif1l
Ptpn12	0.0784638	-0.265829	0.15	0.19	1	Ptpn12
Peak1	0.0788795	-0.256479	0.286	0.314	1	Peak1
S100a1	0.0789569	-0.281258	0.202	0.236	1	S100a1
Mindy1	0.0801887	-0.354018	0.31	0.326	1	Mindy1
Abi3bp	0.0867717	-0.28069	0.694	0.612	1	Abi3bp
Dact2	0.0940887	-0.497187	0.369	0.36	1	Dact2
Col8a1	0.104767	0.346099	0.15	0.107	1	Col8a1
Ahnak2	0.106805	-0.28887	0.734	0.628	1	Ahnak2
Rab32	0.107121	-0.31683	0.189	0.215	1	Rab32
Gda	0.117411	-0.257932	0.637	0.587	1	Gda
Paics	0.118966	-0.253263	0.437	0.413	1	Paics
Sh3bgrl3	0.121793	-0.359841	0.554	0.483	1	Sh3bgrl3
Plekhf1	0.12193	-0.276381	0.169	0.194	1	Plekhf1
Ppp1r18	0.126054	-0.268073	0.217	0.24	1	Ppp1r18
Fkbp5	0.1284	-0.260346	0.128	0.161	1	Fkbp5
Pdzd2	0.148156	-0.255595	0.261	0.277	1	Pdzd2
Fn1	0.156242	-0.354522	0.978	0.963	1	Fn1
Spop	0.17539	-0.254827	0.565	0.512	1	Spop
Klf10	0.175902	-0.273815	0.127	0.153	1	Klf10
Ptpn9	0.179996	-0.312752	0.277	0.285	1	Ptpn9
Cmpk2	0.183906	-0.295541	0.125	0.149	1	Cmpk2
Daglb	0.186793	-0.596869	0.461	0.442	1	Daglb
Myh9	0.190373	-0.321705	0.35	0.347	1	Myh9
Rala	0.191218	-0.276592	0.51	0.459	1	Rala
Nmt1	0.208568	-0.292703	0.275	0.285	1	Nmt1
Snrnp70	0.220391	-0.259813	0.556	0.5	1	Snrnp70
Pdlim2	0.228778	-0.276862	0.547	0.479	1	Pdlim2
Rab8b	0.233925	-0.264773	0.457	0.434	1	Rab8b
Rbm22	0.250011	-0.257106	0.207	0.219	1	Rbm22
Npr1	0.255734	-0.26729	0.468	0.434	1	Npr1
Camk2n1	0.258888	-0.411526	0.639	0.537	1	Camk2n1
Kras	0.266527	-0.307463	0.347	0.339	1	Kras
Tnrc18	0.26765	-0.308862	0.349	0.335	1	Tnrc18
Ly6e	0.280441	-0.275827	0.78	0.694	1	Ly6e
Ccl7	0.294961	0.280071	0.25	0.211	1	Ccl7
Crybg3	0.300928	-0.263866	0.189	0.202	1	Crybg3
Csnk1e	0.3038	-0.261795	0.376	0.364	1	Csnk1e
Vgll3	0.320662	-0.337201	0.56	0.483	1	Vgll3
Lpgat1	0.335468	-0.328352	0.462	0.426	1	Lpgat1
Krtdap	0.347657	-0.53403	0.477	0.438	1	Krtdap
Mafb	0.376496	-0.420948	0.189	0.198	1	Mafb
Cxcl13	0.381155	-0.601388	0.275	0.227	1	Cxcl13
Dusp3	0.39255	-0.312601	0.259	0.256	1	Dusp3
Tagln2	0.400897	-0.265504	0.404	0.38	1	Tagln2
Smad5	0.401928	-0.32647	0.383	0.364	1	Smad5
Cdkn1a	0.41076	-0.303557	0.352	0.355	1	Cdkn1a
Palm	0.415907	-0.26204	0.45	0.401	1	Palm
Tppp3	0.419097	-0.353136	0.684	0.57	1	Tppp3
Mapk3	0.434205	-0.299946	0.363	0.343	1	Mapk3
Kctd12	0.457021	-0.298076	0.371	0.343	1	Kctd12
Nmt2	0.520373	-0.33396	0.336	0.306	1	Nmt2
H2-D1	0.601174	-0.357229	0.873	0.731	1	H2-D1
Sh3bp5	0.616726	-0.274576	0.503	0.421	1	Sh3bp5
Gas1	0.628019	-0.262175	0.633	0.554	1	Gas1
Trim2	0.638829	-0.2974	0.29	0.269	1	Trim2
Wnt10b	0.659475	-0.267356	0.277	0.227	1	Wnt10b
Ankrd12	0.788702	-0.27891	0.472	0.417	1	Ankrd12
Aldh1a3	0.791929	-0.328336	0.618	0.508	1	Aldh1a3
Ptgfrn	0.905616	-0.280186	0.475	0.43	1	Ptgfrn

## Sheet: Sup Table 2
Supp Table 2 Suture CD90 Young vs Aged	p_val	avg_log2FC	pct.1	pct.2	p_val_adj
Col3a1	3.53134e-10	2.17396	1	0.77	1.14009e-05
Sparc	1.73269e-09	1.47821	1	0.967	5.59398e-05
Col1a1	1.17455e-08	1.97864	0.974	0.934	0.000379203
Nrk	2.21946e-08	0.49181	0.436	0	0.000716554
Tpt1	3.26936e-08	0.763771	1	0.984	0.00105551
Gm42418	3.99599e-08	-1.62012	1	1	0.0012901	excluded
Csrp2	1.31327e-07	1.16871	0.821	0.295	0.0042399
Tbpl1	3.08518e-07	0.548317	0.487	0.049	0.0099605
Meg3	6.12446e-07	1.55858	0.846	0.377	0.0197728
mt-Co3	6.28629e-07	0.633484	1	0.984	0.0202953
Col1a2	6.6349e-07	1.56552	0.974	0.951	0.0214208
Ezh2	1.32945e-06	0.873906	0.513	0.066	0.0429213
Rpl12	1.88394e-06	0.933456	1	0.836	0.0608229
Ncapd3	5.07062e-06	0.599511	0.359	0.016	0.163705
Col5a2	8.8059e-06	0.830655	0.949	0.623	0.284299
Adamts12	1.09967e-05	0.57812	0.487	0.082	0.355029
Cdk4	1.12364e-05	0.572685	0.564	0.115	0.362767
Kcnq1ot1	1.24388e-05	1.2074	0.846	0.41	0.401587
Matr3	1.2746e-05	0.576863	0.692	0.197	0.411503
Hba-a1	2.06405e-05	5.29481	0.436	0.066	0.66638
Fdps	2.0667e-05	0.384883	0.359	0.033	0.667234
Gap43	2.35703e-05	0.594153	0.436	0.066	0.760967
Mmp2	2.60949e-05	0.793281	0.949	0.721	0.842473
Rps12	2.86861e-05	0.630123	1	1	0.926131
Ccnt1	2.88661e-05	0.542835	0.667	0.197	0.931941
Yeats4	2.9204e-05	0.423869	0.487	0.082	0.942851
Pde8a	2.96514e-05	0.708896	0.538	0.148	0.957295
Tfrc	3.0193e-05	0.666412	0.308	0.016	0.97478
Ppic	3.04312e-05	0.523341	0.795	0.311	0.982472
Yod1	3.57225e-05	0.314541	0.256	0	1
Stt3b	3.62922e-05	0.576029	0.641	0.18	1
Col5a1	3.77102e-05	0.766018	0.949	0.557	1
Lsm8	4.03856e-05	0.478646	0.59	0.148	1
Serpinh1	4.23128e-05	0.804648	1	0.82	1
Gpc3	4.62134e-05	0.699593	0.872	0.508	1
Tubb5	4.65634e-05	0.98195	0.821	0.459	1
Bola3	4.67943e-05	0.604015	0.462	0.098	1
Afg3l1	5.12358e-05	0.391464	0.333	0.033	1
Banf1	5.16488e-05	0.624737	0.59	0.164	1
Xist	5.97119e-05	0.838327	0.974	0.82	1
Smim27	6.15484e-05	0.502993	0.436	0.082	1
Myo6	6.21719e-05	0.43329	0.333	0.033	1
Cul3	6.32046e-05	0.454809	0.718	0.246	1
Pid1	6.46827e-05	0.534544	0.538	0.131	1
Scai	6.84357e-05	0.412101	0.333	0.033	1
Cnot1	6.86629e-05	0.350584	0.615	0.164	1
Med13	7.62545e-05	0.68829	0.692	0.23	1
Pcgf3	7.68561e-05	0.475523	0.385	0.066	1
Cdc25b	8.00759e-05	0.411247	0.282	0.016	1
Stmn1	8.02427e-05	1.45271	0.385	0.066	1
Peg3	8.18217e-05	0.625166	0.462	0.098	1
Lrrc8b	8.27974e-05	0.392012	0.333	0.033	1
Ctnnal1	8.43643e-05	0.377191	0.282	0.016	1
Yif1b	8.85635e-05	0.446572	0.41	0.066	1
Exosc4	8.8869e-05	0.477016	0.282	0.016	1
Lsm2	9.12866e-05	0.53926	0.487	0.115	1
Clk3	9.25665e-05	0.397077	0.359	0.049	1
Cks1b	9.56112e-05	0.519849	0.436	0.098	1
Sgo2a	9.59825e-05	0.375647	0.231	0	1
Pcdh20	9.59825e-05	0.404764	0.231	0	1
Sec24a	0.000100404	0.401945	0.41	0.066	1
Ube2v1	0.000101571	0.505554	0.692	0.213	1
2510002D24Rik	0.000103786	0.320649	0.282	0.016	1
Taf15	0.000111763	0.410452	0.462	0.098	1
Cnrip1	0.000116162	0.535732	0.462	0.098	1
Zfp260	0.000116363	0.63182	0.564	0.18	1
Igf1	0.000123532	1.26373	0.718	0.279	1
Lamc1	0.000127985	0.766998	0.846	0.426	1
Nid1	0.000133	1.05951	0.872	0.754	1
Cops6	0.00013563	0.482274	0.513	0.131	1
Rps15	0.000136451	0.685472	0.974	0.852	1
Ilf3	0.000137949	0.431312	0.436	0.082	1
Abi1	0.000139064	0.647504	0.641	0.23	1
Anp32e	0.00014166	0.655314	0.667	0.246	1
Tipin	0.000143942	0.576028	0.41	0.082	1
Pgp	0.000145779	0.412175	0.513	0.131	1
H3f3a	0.000156239	0.659669	1	0.934	1
Sfrp2	0.00015856	0.625649	0.769	0.377	1
Dnajc9	0.000162257	0.519193	0.41	0.082	1
Acaa2	0.000163802	0.466023	0.564	0.18	1
Gm26771	0.000171382	0.342542	0.385	0.066	1
Gmppa	0.00017382	0.464869	0.308	0.033	1
Srp54a	0.000182129	0.343382	0.308	0.033	1
Rcc2	0.000182748	0.435187	0.41	0.082	1
Agps	0.000193868	0.33054	0.385	0.066	1
Alyref	0.000194151	0.374966	0.718	0.246	1
Postn	0.00019694	1.09521	0.718	0.279	1
Hax1	0.00019988	0.338909	0.308	0.033	1
Rps3	0.000203946	0.508096	0.974	0.918	1
Rps4x	0.000207042	0.546695	1	0.934	1
Rpl21	0.000212665	0.534468	1	0.902	1
Agtr1a	0.00021387	0.450411	0.41	0.082	1
C130026I21Rik	0.000217336	-0.79847	0	0.295	1
Mxra8	0.000222407	0.501114	0.744	0.295	1
Gclm	0.000223342	0.532871	0.513	0.131	1
U2af1	0.000229376	0.397826	0.641	0.213	1
Cnih1	0.000237168	0.403211	0.615	0.18	1
Cdca3	0.000243608	0.586677	0.256	0.016	1
Nsd2	0.000250358	0.543468	0.462	0.115	1
Ilk	0.000253385	0.482512	0.667	0.262	1
Spc25	0.000254428	0.398396	0.205	0	1
Arhgap11a	0.000254428	0.293564	0.205	0	1
Tmem39a	0.000254428	0.29988	0.205	0	1
Lockd	0.000256304	0.624385	0.256	0.016	1
Rmi1	0.000256304	0.279605	0.256	0.016	1
Diaph3	0.000256304	0.38017	0.256	0.016	1
Hmgcr	0.000258103	0.467107	0.333	0.049	1
Rnf139	0.000258103	0.341276	0.333	0.049	1
Podxl2	0.000269618	0.266	0.256	0.016	1
Champ1	0.000269618	0.280814	0.256	0.016	1
Phf6	0.000269618	0.306555	0.256	0.016	1
Rhoj	0.000283387	0.60954	0.718	0.295	1
Hist1h1b	0.000292857	1.54122	0.385	0.082	1
Mrpl53	0.000295029	0.302719	0.513	0.131	1
Slc16a1	0.000303004	0.318164	0.41	0.082	1
Rpl9	0.000312082	0.524323	1	0.869	1
Naa10	0.000314816	0.35096	0.41	0.082	1
Armc1	0.000333812	0.386139	0.462	0.115	1
Col4a2	0.000336822	0.85828	0.436	0.115	1
Stk25	0.000339314	0.330898	0.538	0.148	1
Trappc1	0.000342877	0.401717	0.513	0.148	1
Hbb-bt	0.000352957	4.98796	0.41	0.098	1
Tmem167	0.000357508	0.61552	0.769	0.328	1
Btrc	0.000363164	0.343569	0.333	0.049	1
Puf60	0.000366222	0.364623	0.564	0.164	1
Polr2d	0.000369718	0.371268	0.359	0.066	1
Eif3i	0.000371447	0.589562	0.641	0.246	1
Itm2a	0.000371447	1.0214	0.641	0.246	1
Gmnn	0.00039533	0.503333	0.282	0.033	1
Zfp597	0.00039533	0.322051	0.282	0.033	1
Hacd1	0.000399204	0.358188	0.385	0.082	1
Hnrnpab	0.000410448	0.633061	0.718	0.328	1
Prrg1	0.000411993	0.255851	0.333	0.049	1
Srpk1	0.000414785	0.369519	0.385	0.082	1
Rpl26	0.00042106	0.491487	1	0.934	1
Cbx1	0.000422227	0.582107	0.692	0.279	1
Smu1	0.000433483	0.37524	0.513	0.148	1
Scaf1	0.000434762	0.26017	0.436	0.098	1
Ifi204	0.000436326	0.402137	0.615	0.213	1
Rnaseh2b	0.000439362	0.353643	0.308	0.049	1
Hbb-bs	0.000449935	6.17886	0.59	0.23	1
Eif5a	0.000457808	0.491234	0.923	0.623	1
Knl1	0.00046125	0.609209	0.231	0.016	1
Rpl13a	0.000466921	0.546202	0.974	0.885	1
Ftx	0.000474398	0.312849	0.282	0.033	1
Pcmt1	0.000477286	0.407011	0.59	0.197	1
Zfx	0.000508932	0.341265	0.462	0.115	1
Slc43a3	0.00051029	0.653455	0.718	0.344	1
Fam114a1	0.000549692	0.479827	0.59	0.213	1
Tubb4b	0.000556765	0.357875	0.667	0.295	1
Fcgrt	0.00056712	0.54515	0.821	0.377	1
Eif1	0.000609127	0.416934	1	0.951	1
Copz2	0.000609582	0.324154	0.615	0.213	1
Adam15	0.000610884	0.473006	0.41	0.098	1
Elk4	0.000622075	0.295758	0.513	0.148	1
Prxl2b	0.000624242	0.3255	0.231	0.016	1
Mcm5	0.000624242	0.424928	0.231	0.016	1
Rian	0.000639669	0.441027	0.564	0.18	1
Mki67	0.000643623	1.26273	0.333	0.066	1
Mthfsd	0.000656133	0.287155	0.231	0.016	1
B4galt7	0.000656133	0.256783	0.231	0.016	1
Ufsp2	0.000659371	0.465976	0.436	0.115	1
Sgce	0.000663669	0.297007	0.513	0.148	1
Sox6	0.000666421	0.322831	0.179	0	1
Zfp251	0.000666421	0.258431	0.179	0	1
Chadl	0.000666421	0.292815	0.179	0	1
Serinc1	0.000669083	0.510725	0.872	0.459	1
Dguok	0.000671061	0.294054	0.564	0.164	1
Rack1	0.000671663	0.569468	0.949	0.869	1
Cenpx	0.000674084	0.564717	0.615	0.246	1
Cdk19	0.000687874	0.493659	0.385	0.098	1
Rpl28	0.000692971	0.549721	1	0.918	1
mt-Nd3	0.00069695	0.473817	0.974	0.77	1
Crispld1	0.000701815	0.422746	0.385	0.082	1
Gnpda2	0.000701815	0.313615	0.385	0.082	1
Ramac	0.000716782	0.440718	0.487	0.148	1
Fkbp14	0.000728234	0.327785	0.308	0.049	1
Zfp84	0.000728234	0.311848	0.308	0.049	1
Prkaca	0.000728234	0.310618	0.308	0.049	1
Vamp3	0.000731123	0.359938	0.436	0.115	1
Ufc1	0.000756469	0.541217	0.769	0.361	1
Katnbl1	0.000756492	0.317287	0.41	0.098	1
Vps4a	0.000756492	0.326824	0.41	0.098	1
Cnpy2	0.000766847	0.496711	0.795	0.344	1
Pwwp2a	0.000783687	0.320692	0.41	0.098	1
Atad1	0.000783687	0.397906	0.41	0.098	1
Mfap2	0.000812957	0.498124	0.59	0.213	1
Plagl1	0.000814742	0.386361	0.333	0.066	1
Ran	0.000827868	0.853212	0.769	0.426	1
Tuba1a	0.000832288	0.53605	0.923	0.672	1
Gtf2a2	0.000845287	0.479598	0.667	0.246	1
Zfp329	0.000847068	0.291744	0.333	0.066	1
Eef1a1	0.000851138	0.449301	1	1	1
Mrpl49	0.000854306	0.488533	0.359	0.082	1
Apbb2	0.000861873	0.466803	0.615	0.262	1
Klhl13	0.000867025	0.382544	0.436	0.115	1
Rplp0	0.000871933	0.59709	1	0.902	1
Psmd11	0.000874178	0.4407	0.692	0.295	1
Ndufa12	0.000875163	0.441041	0.564	0.197	1
mt-Co2	0.000884137	0.335944	1	0.984	1
Klf9	0.000894267	0.797949	0.821	0.508	1
Hdac2	0.000896213	0.383735	0.615	0.213	1
Ctr9	0.000913245	0.291357	0.513	0.148	1
mt-Atp6	0.000918384	0.390213	1	1	1
Ybx3	0.000930341	0.616167	0.872	0.541	1
Neo1	0.000937248	0.524554	0.436	0.131	1
Lpar1	0.000940128	0.407866	0.692	0.279	1
Smc4	0.000942321	0.749676	0.462	0.164	1
Abca6	0.00096685	0.25396	0.41	0.098	1
Reck	0.000972599	0.303682	0.513	0.148	1
Ammecr1	0.000988633	0.285127	0.333	0.066	1
Ten1	0.000990266	0.365895	0.359	0.082	1
Kat2b	0.00100098	0.348786	0.41	0.098	1
Gabpa	0.00100913	0.424511	0.41	0.115	1
Top2a	0.00103845	1.39531	0.282	0.049	1
Alas1	0.00105928	0.270046	0.256	0.033	1
Wipi1	0.00107867	0.394994	0.564	0.213	1
Sc5d	0.00108006	0.423182	0.41	0.115	1
Srebf2	0.00108143	0.25807	0.538	0.164	1
Rad50	0.0011129	0.39112	0.538	0.18	1
Rfc4	0.00117164	0.380905	0.205	0.016	1
Ormdl2	0.00117248	0.404983	0.385	0.098	1
Klhdc2	0.00119422	0.312418	0.487	0.148	1
Prc1	0.00120909	0.388798	0.256	0.033	1
Rnf26	0.00120909	0.280549	0.256	0.033	1
1300002E11Rik	0.00120909	0.348642	0.256	0.033	1
Inhba	0.00123159	0.365038	0.205	0.016	1
Ssr2	0.00125298	0.514271	0.641	0.262	1
Dap	0.00129361	0.294397	0.821	0.344	1
A430005L14Rik	0.00132418	0.306444	0.359	0.082	1
Zfp592	0.00132418	0.27731	0.359	0.082	1
Nedd8	0.00134391	0.512958	0.872	0.541	1
Creb1	0.00135273	0.286027	0.487	0.148	1
Ano3	0.00136009	0.28344	0.205	0.016	1
Prmt1	0.00136234	0.269392	0.462	0.131	1
Nmi	0.00137254	0.335887	0.359	0.082	1
Eif1ax	0.00137982	0.434101	0.59	0.23	1
Ndufb9	0.00138584	0.45883	0.923	0.607	1
Atr	0.00138955	0.47569	0.333	0.082	1
Cops3	0.00142253	0.292723	0.359	0.082	1
Cpz	0.00142887	0.398954	0.205	0.016	1
Pclaf	0.00142887	1.06414	0.205	0.016	1
Asf1a	0.00144379	0.28079	0.333	0.066	1
Lman1	0.00145952	0.496228	0.718	0.328	1
Mrps9	0.00147527	0.278292	0.436	0.115	1
Dynlrb1	0.00148908	0.4585	0.897	0.426	1
Birc5	0.00150085	0.791869	0.205	0.016	1
Sox4	0.00152895	0.523899	0.538	0.197	1
Nova1	0.00154281	0.597683	0.641	0.279	1
Ap5m1	0.00156283	0.262355	0.282	0.049	1
Zdhhc9	0.00156283	0.32528	0.282	0.049	1
Snhg6	0.00157048	0.380182	0.308	0.066	1
Hba-a2	0.00157048	4.43992	0.308	0.066	1
Slc35a3	0.00157616	0.329138	0.205	0.016	1
Sdf2l1	0.00157755	0.348085	0.436	0.131	1
Arhgap1	0.0016037	0.362125	0.462	0.148	1
Rps2	0.00162048	0.513974	1	0.902	1
Fam160a2	0.00162688	0.263472	0.282	0.049	1
Dgcr8	0.00162688	0.337851	0.282	0.049	1
Psmd12	0.00165059	0.405255	0.667	0.262	1
Phf10	0.00165384	0.335792	0.385	0.098	1
Atp2a3	0.00165493	0.291777	0.205	0.016	1
Trappc6b	0.00167943	0.46698	0.59	0.246	1
Rpl5	0.00169061	0.488652	1	0.82	1
Tbc1d8b	0.00169335	0.345267	0.282	0.049	1
Mcts1	0.00170335	0.406299	0.462	0.164	1
Tmed7	0.0017093	0.290671	0.641	0.246	1
Dtl	0.00172843	0.274914	0.154	0	1
Depdc1a	0.00172843	0.281251	0.154	0	1
Asf1b	0.00172843	0.354302	0.154	0	1
Hmmr	0.00172843	0.451034	0.154	0	1
Alas2	0.00172843	0.489712	0.154	0	1
Cbx5	0.00173073	0.4219	0.718	0.311	1
Cdk1	0.00173731	0.383156	0.205	0.016	1
Stub1	0.00173904	0.380528	0.692	0.262	1
Prkci	0.0017593	0.44057	0.308	0.066	1
Rpl14	0.00179866	0.540052	0.974	0.852	1
Gps2	0.00181004	0.465272	0.462	0.164	1
Dpp4	0.00183981	0.696401	0.872	0.557	1
Ssna1	0.00185112	0.398119	0.487	0.164	1
Hprt	0.00185567	0.389343	0.333	0.082	1
Pogz	0.00189656	0.344832	0.308	0.066	1
Med8	0.00189742	0.264565	0.41	0.115	1
Trrap	0.00189742	0.250022	0.41	0.115	1
Gnpnat1	0.00190547	0.673315	0.513	0.18	1
Col6a1	0.00190686	0.540911	0.949	0.738	1
Usp39	0.00190802	0.270634	0.282	0.049	1
Wnt5a	0.00193972	0.405742	0.41	0.131	1
Pop5	0.00195407	0.269782	0.359	0.082	1
Rpl7a	0.00199534	0.418736	0.949	0.836	1
Tspan3	0.00200232	0.313045	0.795	0.311	1
Mbnl2	0.00201299	0.460679	0.769	0.311	1
Ankib1	0.00202416	0.309887	0.41	0.115	1
Nbdy	0.00202416	0.298255	0.41	0.115	1
Med1	0.00202446	0.276786	0.59	0.197	1
Hist1h1a	0.00204632	0.601675	0.231	0.033	1
Akap12	0.00205558	0.51349	0.821	0.475	1
Adprh	0.00208112	0.350339	0.641	0.23	1
Slc25a39	0.00211744	0.337178	0.513	0.164	1
Klhl12	0.00213761	0.305084	0.231	0.033	1
Cpeb4	0.00213905	0.375139	0.359	0.098	1
Bmp4	0.002201	0.319181	0.308	0.066	1
Camta1	0.00221728	0.330492	0.256	0.049	1
Hdgfl2	0.00222889	0.268839	0.41	0.115	1
Rpl23a	0.00226483	0.470336	1	0.918	1
Pmf1	0.0022838	0.327538	0.308	0.066	1
Pcolce2	0.00228608	0.663903	0.846	0.721	1
Pnp	0.00234875	0.34964	0.795	0.377	1
Fam171b	0.00235282	0.504645	0.385	0.115	1
Gabpb2	0.00239076	0.325982	0.564	0.213	1
Vamp2	0.00241524	0.344156	0.487	0.164	1
March5	0.00242139	0.382451	0.436	0.148	1
Dhdds	0.00243434	0.266662	0.231	0.033	1
Eef1b2	0.00243867	0.574346	0.949	0.77	1
Emc8	0.00244756	0.350144	0.359	0.098	1
Gtf3c6	0.00244756	0.34336	0.359	0.098	1
Ankrd17	0.00245	0.369858	0.744	0.344	1
Lamb1	0.00249646	0.491132	0.667	0.295	1
Tor1a	0.0025308	0.3473	0.359	0.098	1
Laptm4a	0.00253338	0.462909	0.974	0.721	1
Zwint	0.00254908	0.348095	0.333	0.082	1
Snf8	0.00255278	0.462564	0.513	0.213	1
Iws1	0.0025726	0.342897	0.436	0.148	1
Ube3a	0.00257539	0.574629	0.692	0.377	1
Arf4	0.0026128	0.482722	0.795	0.525	1
Ndfip2	0.00263924	0.322297	0.333	0.082	1
Synj1	0.00264436	0.284398	0.308	0.066	1
Rplp1	0.0026693	0.360198	1	1	1
H2afx	0.00267061	0.795682	0.282	0.066	1
Rps18	0.00271427	0.546	0.974	0.836	1
Cog2	0.0027323	0.259967	0.333	0.082	1
Polb	0.00276703	0.292219	0.462	0.148	1
Dnajc8	0.00282293	0.34296	0.769	0.393	1
Hnrnpd	0.00287541	0.487454	0.795	0.459	1
Rps17	0.00289147	0.426804	0.974	0.918	1
Rps25	0.00292091	0.481604	1	0.869	1
S100a6	0.00292772	-0.855709	1	0.951	1
mt-Co1	0.00292806	0.286254	1	0.984	1
Rpl10	0.00293068	0.539488	0.923	0.836	1
Rpl7l1	0.00293824	0.29135	0.436	0.131	1
Rps23	0.00299615	0.380548	1	1	1
Ppp2r2b	0.00301373	0.266563	0.231	0.033	1
Timm23	0.0030182	0.40784	0.615	0.246	1
Angel2	0.00302312	0.304489	0.462	0.148	1
Stom	0.00304925	0.342535	0.256	0.049	1
Oga	0.0030547	0.359076	0.59	0.23	1
Ncaph2	0.00308701	0.332176	0.359	0.098	1
Tgfb2	0.00312115	0.500344	0.487	0.18	1
Brd1	0.00314674	0.291704	0.641	0.246	1
Pxdn	0.00317618	0.309229	0.462	0.164	1
Pcsk6	0.00317659	0.437971	0.692	0.344	1
Rsl1d1	0.0031902	0.396971	0.513	0.197	1
Rrm2	0.00323754	0.853282	0.179	0.016	1
Zfp644	0.00326348	0.411404	0.615	0.246	1
Cdr2	0.0032788	0.278997	0.231	0.033	1
Pole3	0.00329586	0.298114	0.359	0.098	1
Erlin2	0.00329586	0.294661	0.359	0.098	1
Pcnt	0.00329586	0.301866	0.359	0.098	1
Ep400	0.00336463	0.320872	0.462	0.164	1
Hnrnpa1	0.00338304	0.541675	0.744	0.41	1
Cnot6	0.00339466	0.353535	0.59	0.23	1
Ebf1	0.00341529	0.609394	0.974	0.836	1
Rpl24	0.00343464	0.386214	1	0.918	1
Cdk13	0.00344825	0.371635	0.385	0.115	1
Vpreb3	0.00345507	0.797654	0.513	0.213	1
Nr1d1	0.00345902	-0.543034	0	0.197	1
2610037D02Rik	0.00345925	0.328363	0.282	0.066	1
Mtfr1l	0.00349277	0.314355	0.564	0.213	1
Kpna3	0.00351749	0.309253	0.359	0.098	1
Cdkn1c	0.00355004	0.541736	0.538	0.197	1
Emc4	0.0035632	0.387652	0.462	0.164	1
Fbxo30	0.00356421	0.253374	0.256	0.049	1
Ccnb2	0.00356611	0.390127	0.179	0.016	1
Vkorc1l1	0.00358778	0.312845	0.282	0.066	1
Hipk2	0.00358778	0.368243	0.282	0.066	1
Ccdc88a	0.00362086	0.56187	0.615	0.279	1
Arrdc3	0.00365945	0.515409	0.513	0.197	1
Prelid3b	0.00370475	0.339534	0.256	0.049	1
Tes	0.00370475	0.341944	0.256	0.049	1
Mospd2	0.00370475	0.25261	0.256	0.049	1
Prkca	0.00373432	0.253975	0.436	0.131	1
Ndc80	0.00374152	0.279439	0.179	0.016	1
Gfpt1	0.00376016	0.303794	0.513	0.18	1
Rpl17	0.00376163	0.403369	1	0.951	1
Dnmt1	0.00383108	0.410256	0.41	0.131	1
Gpr153	0.00385031	0.250359	0.256	0.049	1
Slc30a5	0.00385797	0.355293	0.282	0.066	1
Zfand6	0.00388926	0.451116	0.667	0.311	1
Ccna2	0.00392474	0.345774	0.179	0.016	1
Fubp1	0.00393982	0.376841	0.641	0.279	1
Ciao1	0.00399988	0.313361	0.282	0.066	1
S100pbp	0.00400104	0.290226	0.256	0.049	1
Hnrnpa3	0.00402533	0.679433	0.872	0.607	1
Tcf12	0.00409853	0.315414	0.615	0.23	1
Cks2	0.00410467	0.446525	0.333	0.098	1
Sdhaf2	0.00410713	0.305442	0.462	0.164	1
Tpx2	0.00411607	0.5371	0.179	0.016	1
Cdca8	0.00411607	0.471807	0.179	0.016	1
Hist1h3c	0.00411607	0.526993	0.179	0.016	1
Siah1a	0.00413214	0.306447	0.359	0.098	1
Lgals1	0.00415649	0.355467	1	0.77	1
Zfp771	0.00419067	0.339085	0.41	0.131	1
Mrps18a	0.00419367	0.327107	0.538	0.213	1
Sh3pxd2b	0.00420473	0.393146	0.564	0.262	1
Eif3b	0.00424116	0.272226	0.487	0.18	1
Sec11c	0.00425468	0.341819	0.692	0.344	1
Nfu1	0.00427818	0.262681	0.462	0.148	1
Tomm20	0.00428714	0.389459	0.795	0.377	1
Pycr2	0.00429801	0.256124	0.282	0.066	1
Dnase2a	0.00429801	0.349176	0.282	0.066	1
Spc24	0.00431582	0.297965	0.179	0.016	1
Esco2	0.00431582	0.323302	0.179	0.016	1
Phf11d	0.00435852	0.426432	0.308	0.082	1
Xrcc6	0.00441783	0.266584	0.385	0.115	1
P4htm	0.00445192	0.320706	0.128	0	1
Slc22a5	0.00445192	0.302279	0.128	0	1
Mis18bp1	0.00445192	0.260434	0.128	0	1
Cenpk	0.00445192	0.330214	0.128	0	1
Fignl2	0.00445192	0.296337	0.128	0	1
Rbm5	0.00446131	0.387138	0.641	0.279	1
Zfp518a	0.0045033	0.370514	0.436	0.148	1
Srpx	0.0045033	0.358378	0.436	0.148	1
Man1a	0.00450575	0.781214	0.821	0.639	1
Gm10115	0.0045806	0.361555	0.41	0.131	1
Cdk7	0.00461615	0.271315	0.282	0.066	1
Gm26782	0.00461615	0.269796	0.282	0.066	1
Trmt112	0.00466589	0.340438	0.59	0.262	1
Usp5	0.00467362	0.330151	0.333	0.098	1
G3bp1	0.00472365	0.415647	0.641	0.311	1
Tuba4a	0.00474862	0.632205	0.282	0.082	1
Mageh1	0.00478309	0.288691	0.282	0.066	1
Rpl15	0.00478571	0.504335	1	0.836	1
Atad2	0.00482164	0.506419	0.359	0.115	1
Sun1	0.00484097	0.268748	0.385	0.115	1
Ube2c	0.00485082	0.944722	0.205	0.033	1
Car2	0.00485082	1.92177	0.205	0.033	1
Golgb1	0.0049356	0.560467	0.692	0.328	1
Ranbp1	0.00495434	0.485652	0.744	0.377	1
Dennd4c	0.00495547	0.299971	0.282	0.066	1
Trerf1	0.00495547	0.259097	0.282	0.066	1
Arhgap12	0.00495547	0.293955	0.282	0.066	1
Stx7	0.00503775	0.33723	0.538	0.213	1
Rfc1	0.0050904	0.36637	0.564	0.23	1
Apip	0.00531306	0.359834	0.333	0.098	1
Rpe	0.00531719	0.321444	0.282	0.066	1
Glyr1	0.00535603	0.319214	0.564	0.23	1
Nupr1	0.00540513	0.578332	0.795	0.377	1
Fkbp11	0.00545242	0.353866	0.359	0.115	1
Ddhd1	0.0054848	0.250641	0.333	0.098	1
Ppp1r14b	0.00549385	0.404333	0.949	0.525	1
Orc3	0.00550233	0.297159	0.205	0.033	1
Dhfr	0.00550233	0.26924	0.205	0.033	1
Sharpin	0.00550233	0.316441	0.205	0.033	1
Ptges3	0.00550899	0.309931	0.872	0.492	1
Rab38	0.00551368	0.281653	0.308	0.082	1
Chmp7	0.00551368	0.258559	0.308	0.082	1
Uqcc2	0.00561647	0.392082	0.897	0.557	1
Ankrd40	0.00565288	0.31138	0.436	0.148	1
Rpl32	0.00572118	0.437354	1	0.918	1
Calcrl	0.00572688	0.483333	0.538	0.23	1
Nusap1	0.00573645	0.479043	0.205	0.033	1
Nrbf2	0.00579494	0.269479	0.359	0.115	1
Slc38a1	0.00579494	0.300582	0.359	0.115	1
Snrpc	0.00583503	0.320439	0.641	0.279	1
Hmbs	0.00587531	0.827612	0.231	0.049	1
Srsf2	0.00587699	0.445796	0.744	0.393	1
Trio	0.00589254	0.359571	0.718	0.361	1
Pdia6	0.00592119	0.557159	0.846	0.525	1
Tmem97	0.00597951	0.290626	0.205	0.033	1
Rcn3	0.00609976	0.376247	0.744	0.344	1
Arf1	0.00612924	0.487422	0.923	0.607	1
Parl	0.00615676	0.279804	0.359	0.115	1
Pdzd8	0.00618918	0.348134	0.487	0.18	1
Serf1	0.00622062	0.256968	0.462	0.164	1
Mir99ahg	0.00623009	0.374206	0.513	0.197	1
Cenpf	0.00623181	0.546366	0.205	0.033	1
Tinagl1	0.00623181	0.314748	0.205	0.033	1
Tmem108	0.00634078	0.362733	0.231	0.049	1
Rhobtb2	0.00634078	0.367101	0.231	0.049	1
Rrm1	0.00646559	0.427591	0.41	0.148	1
Ift20	0.00650107	0.329382	0.846	0.508	1
Rev3l	0.00650399	0.255107	0.538	0.197	1
Mesd	0.00652523	0.390972	0.487	0.18	1
Eri1	0.00667145	0.338912	0.385	0.131	1
Cct5	0.00671641	0.46423	0.821	0.41	1
2610002M06Rik	0.00671641	0.257024	0.308	0.082	1
Fbxo42	0.00676536	0.266406	0.205	0.033	1
Rcn1	0.00691796	0.338228	0.641	0.311	1
Antxr2	0.00692327	0.460013	0.769	0.426	1
Rps15a	0.00694205	0.438939	1	0.951	1
Rap1a	0.00701683	0.380761	0.872	0.492	1
Tshz1	0.00702301	0.428579	0.436	0.18	1
Aatf	0.00704724	0.258955	0.205	0.033	1
Sacs	0.00704724	0.258205	0.205	0.033	1
Ube4b	0.0070676	0.331622	0.385	0.131	1
Ifi207	0.00706787	0.281566	0.615	0.262	1
Dapk1	0.00719237	0.396826	0.821	0.443	1
Ndufa2	0.00724704	0.372382	0.949	0.623	1
Nub1	0.00727348	-0.660554	0.103	0.311	1
Mindy3	0.00737249	0.302629	0.231	0.049	1
Rps14	0.00755483	0.300665	1	0.951	1
Caprin1	0.00756324	0.408104	0.718	0.344	1
Ext1	0.00757885	0.401128	0.641	0.328	1
Ubac1	0.00758877	0.338716	0.359	0.115	1
Psmd8	0.00761805	0.357995	0.795	0.393	1
Eif2s1	0.00763408	0.294651	0.487	0.18	1
Tbcc	0.00765289	0.30438	0.231	0.049	1
Haus1	0.00765289	0.261418	0.231	0.049	1
Rpl7	0.00771541	0.290355	1	0.951	1
Mbtps1	0.00776117	0.265743	0.538	0.213	1
Hspe1	0.00780279	0.35015	0.795	0.508	1
Klhl24	0.00780366	0.408874	0.59	0.262	1
Uchl1	0.00786082	0.378902	0.436	0.164	1
Pafah1b3	0.00787726	0.410134	0.538	0.246	1
Sec63	0.00790454	0.441967	0.641	0.344	1
Ppp1r10	0.0079416	0.382522	0.462	0.18	1
Ell	0.00794282	0.300413	0.231	0.049	1
Myl4	0.00797322	0.668851	0.256	0.066	1
Rnf7	0.00799524	0.349558	0.667	0.328	1
Fkbp7	0.008195	0.387687	0.564	0.246	1
Rps8	0.00821625	0.355434	1	0.967	1
Rabepk	0.00825428	0.295999	0.256	0.066	1
Hist2h2bb	0.0083852	0.496694	0.154	0.016	1
Tyms	0.0083852	0.356504	0.154	0.016	1
Carm1	0.00847447	0.314705	0.333	0.098	1
Cd81	0.00851841	0.410715	0.949	0.656	1
Fasn	0.00855235	0.255947	0.231	0.049	1
Il18	0.00858212	0.382746	0.513	0.213	1
Gpr171	0.00868283	0.453392	0.282	0.082	1
Fip1l1	0.00872495	0.288313	0.641	0.295	1
Mrpl32	0.00874238	0.302487	0.538	0.23	1
Acss3	0.00878844	0.256142	0.154	0.016	1
Fen1	0.00878844	0.291659	0.154	0.016	1
C1galt1	0.00880686	0.327191	0.564	0.262	1
N4bp2	0.0088718	0.310433	0.385	0.131	1
Ntrk2	0.00895755	0.263614	0.538	0.23	1
Iglc1	0.00905594	1.6801	0.333	0.115	1
Adam33	0.00905879	0.333247	0.59	0.279	1
Tuba1b	0.00916212	0.541533	0.923	0.623	1
Tspan33	0.00920892	0.276278	0.154	0.016	1
Hist1h2ae	0.00920892	0.629467	0.154	0.016	1
Hells	0.00920892	0.342262	0.154	0.016	1
C1qtnf2	0.00930317	0.339262	0.308	0.098	1
Sash1	0.00943461	0.366655	0.744	0.41	1
Sumo2	0.00945199	0.426208	0.923	0.623	1
Usp1	0.00951243	0.330054	0.41	0.148	1
Clspn	0.00954517	0.355522	0.231	0.049	1
Polr2j	0.00956636	0.250693	0.59	0.246	1
Park7	0.00961342	0.34176	0.821	0.459	1
Arl5c	0.00964424	0.384152	0.359	0.131	1
Cdca7	0.00964726	0.278492	0.154	0.016	1
Hist1h2ab	0.00964726	0.355398	0.154	0.016	1
Galm	0.00964726	0.26127	0.154	0.016	1
Tbl1x	0.00966591	0.336665	0.615	0.295	1
Col6a2	0.00975649	0.540851	0.949	0.689	1
Ltf	0.00987992	1.29673	0.282	0.082	1
Ppme1	0.0098913	0.298369	0.308	0.098	1
Mrgprg	0.00992068	-1.48517	0.103	0.295	1
Atp5b	0.00995003	0.258648	0.872	0.525	1
Cox6a2	0.0101041	0.514408	0.154	0.016	1
Fundc2	0.0101279	0.447263	0.641	0.344	1
Pamr1	0.0101441	0.264194	0.564	0.262	1
1110038B12Rik	0.0101854	0.372217	0.333	0.115	1
Lamtor5	0.0102333	0.280043	0.641	0.295	1
Zcchc17	0.0102412	0.304771	0.462	0.197	1
Man2a1	0.0102432	0.28104	0.821	0.459	1
Gdi2	0.0102948	0.494943	0.872	0.492	1
Cd24a	0.0103225	0.638987	0.667	0.393	1
Sri	0.0104279	0.432385	0.846	0.59	1
Zfyve21	0.0104343	0.365379	0.41	0.164	1
Ccdc125	0.0104826	0.264214	0.256	0.066	1
Oaz1	0.0105073	0.343371	1	0.885	1
Tcaf1	0.0105123	0.332514	0.308	0.098	1
Srek1ip1	0.0105123	0.28461	0.308	0.098	1
Luc7l	0.0105123	0.30597	0.308	0.098	1
Nrep	0.0105123	0.409826	0.308	0.098	1
Desi1	0.0105319	0.359235	0.282	0.082	1
Nudt21	0.0105895	0.343903	0.59	0.262	1
Armcx3	0.0105917	0.257728	0.41	0.148	1
Rpl31	0.0106504	0.3878	1	0.787	1
Psmd7	0.0106646	0.362965	0.744	0.344	1
Dynll1	0.0106845	0.31819	0.974	0.754	1
Rtf2	0.0107131	0.423464	0.487	0.213	1
Chchd7	0.0107958	0.367296	0.333	0.115	1
Mrpl35	0.0108536	0.266068	0.385	0.148	1
Rbm25	0.0108565	0.375661	0.923	0.525	1
Tm9sf4	0.0109784	0.274271	0.487	0.213	1
Eea1	0.0109871	0.28713	0.667	0.344	1
Prdx2	0.0110374	1.03369	0.872	0.525	1
Fam173a	0.0110403	0.302923	0.462	0.197	1
Pts	0.0111678	0.282445	0.308	0.098	1
Zbtb37	0.0112107	0.521286	0.256	0.066	1
Zfp9	0.0112107	0.273539	0.256	0.066	1
Zeb1	0.0112558	0.346712	0.667	0.361	1
Slbp	0.0113713	0.488914	0.462	0.18	1
Ptpa	0.0114115	0.355419	0.359	0.131	1
Eif3k	0.0114196	0.3618	0.897	0.607	1
Eif4g2	0.0114354	-0.460358	0.846	0.82	1
Spta1	0.011439	0.292511	0.103	0	1
Mest	0.011439	0.306444	0.103	0	1
Snca	0.011439	0.434448	0.103	0	1
Gypa	0.011439	0.818582	0.103	0	1
Slc4a1	0.011439	0.623034	0.103	0	1
Cenph	0.011439	0.330597	0.103	0	1
Armcx6	0.011439	0.280654	0.103	0	1
Tpst1	0.0114707	0.288278	0.41	0.148	1
Anp32b	0.0115012	0.698896	0.872	0.525	1
Tmed1	0.0115089	0.281542	0.308	0.098	1
Ehmt1	0.0115882	0.31689	0.41	0.164	1
Lysmd3	0.0115882	0.284043	0.41	0.164	1
Nbea	0.0117325	0.305068	0.359	0.131	1
Tdp2	0.011746	0.339643	0.179	0.033	1
Fam53b	0.0118283	0.336054	0.436	0.18	1
Phf5a	0.0118938	0.378606	0.41	0.164	1
Alkbh5	0.0119336	0.306962	0.538	0.23	1
Rpl36al	0.0120604	0.409667	0.923	0.787	1
Rpl18a	0.0121149	0.316821	1	0.967	1
Mcm2	0.0122296	0.307766	0.179	0.033	1
Rpl27a	0.0123597	0.344613	1	1	1
Arl3	0.0125674	0.26978	0.462	0.18	1
Fibin	0.0127307	-0.36581	0	0.148	1
Csprs	0.0127307	-0.407596	0	0.148	1
Numb	0.0127344	-0.445958	0.026	0.197	1
3830406C13Rik	0.0128268	0.320358	0.333	0.115	1
Tma7	0.0129113	0.380736	0.795	0.607	1
Kat6a	0.0130054	0.26425	0.59	0.262	1
Acadm	0.0130891	0.275233	0.385	0.148	1
Rpsa	0.0131142	0.376305	1	0.918	1
Arpc1b	0.0131559	-0.555733	0.846	0.82	1
Taf7	0.0132427	0.259482	0.436	0.164	1
Ints1	0.01325	0.250674	0.179	0.033	1
Vangl1	0.0133572	0.255117	0.308	0.098	1
Procr	0.0133641	0.354409	0.513	0.23	1
Ahnak	0.0133809	-0.551056	0.974	0.967	1
Hnrnpu	0.0133978	0.525296	0.846	0.541	1
Aspn	0.0134152	0.585452	0.769	0.492	1
Brd8	0.0134397	0.34541	0.385	0.148	1
Hebp1	0.0135752	0.342184	0.333	0.115	1
AI662270	0.0135752	0.261753	0.333	0.115	1
Rpl13	0.0136488	0.354396	1	0.967	1
Pan3	0.0137524	0.289614	0.436	0.18	1
Serpinf1	0.0137532	0.535357	0.949	0.689	1
Zfp322a	0.0137569	0.261992	0.308	0.098	1
Rif1	0.01378	0.468734	0.385	0.164	1
Mef2a	0.0138073	0.410585	0.641	0.377	1
Mrps24	0.0138791	0.304773	0.795	0.41	1
Smc2	0.0139637	0.318415	0.333	0.115	1
Dut	0.0142267	0.808932	0.333	0.131	1
Golga7	0.0142406	0.289844	0.41	0.164	1
Bnip3l	0.0142871	0.265819	0.821	0.525	1
Chaf1a	0.0143449	0.261856	0.179	0.033	1
Yipf6	0.0143449	0.256664	0.179	0.033	1
Lsm6	0.014452	0.49457	0.615	0.344	1
Ube2s	0.014686	0.544529	0.615	0.328	1
Rras	0.0147655	0.459939	0.641	0.328	1
Rbm3	0.0147966	0.386597	0.923	0.656	1
Prpf6	0.0148143	0.297726	0.436	0.18	1
Efemp1	0.0148814	0.454267	0.872	0.738	1
Samd9l	0.0148852	0.357606	0.538	0.246	1
Tmcc2	0.0149218	0.259591	0.179	0.033	1
Dlst	0.0149303	0.27842	0.462	0.18	1
Kctd2	0.0150199	0.257191	0.308	0.098	1
Pdgfra	0.0150704	0.279119	0.795	0.426	1
Pnisr	0.0151895	0.29205	0.692	0.41	1
Rps3a1	0.0152029	0.385256	1	1	1
Pnpla8	0.0152273	0.3096	0.641	0.295	1
Atp5o	0.0152868	0.354069	0.872	0.541	1
P4hb	0.0154121	0.33165	0.897	0.508	1
Snrpd2	0.0155274	0.346975	0.846	0.525	1
Rps10	0.0156533	0.304345	1	0.984	1
Exoc4	0.0156737	0.381246	0.436	0.197	1
Wnt2	0.0157833	0.290391	0.41	0.18	1
Lars2	0.0157949	-0.380771	0.974	0.918	1
Slc25a3	0.015879	0.282331	0.923	0.59	1
Snx5	0.0158965	0.369697	0.564	0.279	1
Tceal8	0.0161259	0.351989	0.462	0.213	1
Igf2	0.016137	0.766258	0.179	0.033	1
Cerk	0.0162567	0.303	0.359	0.131	1
Wdr36	0.0162685	0.258659	0.282	0.082	1
Gnas	0.0162712	0.360623	1	0.967	1
Emb	0.0163572	-0.815903	0.256	0.459	1
Snapin	0.0165075	0.260157	0.333	0.115	1
Gstt1	0.016556	0.261522	0.385	0.148	1
Ltb4r1	0.016649	0.482433	0.231	0.066	1
Fgfr1op	0.016649	0.251174	0.231	0.066	1
Eif4a3	0.0168393	0.353605	0.513	0.23	1
Yipf4	0.0168524	0.32264	0.513	0.262	1
Rhoc	0.0168535	0.315423	0.821	0.475	1
Blvrb	0.0168535	0.710467	0.744	0.525	1
St3gal5	0.0169129	0.293914	0.385	0.164	1
Atf7	0.0169867	0.30002	0.41	0.164	1
Ccdc174	0.0171568	0.283818	0.436	0.18	1
Tmem14c	0.0171896	0.594696	0.667	0.377	1
Rnaseh2c	0.017227	0.339698	0.513	0.23	1
Ilkap	0.0173041	0.256198	0.487	0.197	1
Pdhb	0.0174148	0.295149	0.41	0.164	1
Hist2h2ac	0.0175103	0.683238	0.282	0.098	1
Prdx4	0.0176762	0.369144	0.436	0.197	1
Tifa	0.0176879	0.438768	0.333	0.131	1
Ncl	0.017787	-0.447903	0.872	0.869	1
Timm17b	0.017898	0.342851	0.359	0.148	1
Abhd16a	0.0179256	0.255015	0.333	0.115	1
Hist1h1e	0.0180476	0.831394	0.641	0.41	1
Gem	0.0185619	0.475506	0.282	0.098	1
Kidins220	0.018921	0.307729	0.487	0.213	1
Bmp1	0.0190785	0.252413	0.744	0.393	1
Mcm7	0.0191042	0.381637	0.256	0.082	1
Ppm1g	0.0192855	0.28932	0.513	0.23	1
Agpat4	0.0193373	0.274022	0.359	0.148	1
Fryl	0.0193511	0.264542	0.436	0.18	1
Aox3	0.0194986	-0.641228	0	0.131	1
Bok	0.0194986	-0.333412	0	0.131	1
Fam171a2	0.0194986	-0.312176	0	0.131	1
Stoml2	0.0196683	0.288335	0.282	0.098	1
Dnajc3	0.0196785	0.272199	0.821	0.557	1
Slmap	0.0197221	0.258621	0.513	0.23	1
Pofut2	0.0198391	0.30365	0.359	0.148	1
Spag9	0.0198518	-0.541118	0.769	0.738	1
Pkd2	0.0198678	0.361028	0.667	0.361	1
Vangl2	0.0198679	0.270574	0.205	0.049	1
Ddt	0.0198995	0.266493	0.436	0.197	1
Lamb2	0.0199058	0.288605	0.744	0.41	1
Map1lc3a	0.0199352	0.348583	0.769	0.41	1
Qk	0.0199449	0.604208	0.744	0.443	1
Rpl29	0.0201981	0.405121	0.974	0.852	1
Cstb	0.0202367	0.28386	0.667	0.377	1
Clock	0.020261	0.267504	0.487	0.213	1
Cops2	0.0202899	0.263455	0.385	0.148	1
Snrnp200	0.0203418	0.289052	0.538	0.246	1
Arntl	0.0203522	0.394573	0.359	0.148	1
Hist1h4d	0.0205374	0.953652	0.41	0.197	1
Rab5if	0.0206903	0.293687	0.667	0.361	1
Sike1	0.0208223	0.284154	0.462	0.213	1
Mcm6	0.0209235	0.392431	0.256	0.082	1
Yae1d1	0.0209235	0.279213	0.256	0.082	1
Emc10	0.021019	0.297851	0.513	0.262	1
Dnajc7	0.0210732	0.303486	0.718	0.41	1
Plpp3	0.0211469	0.441524	0.923	0.869	1
Srrm1	0.0211483	0.332569	0.744	0.426	1
Snx3	0.0213295	0.297823	0.718	0.377	1
Ptpn4	0.0214127	0.415045	0.128	0.016	1
Fam111a	0.0214813	0.389449	0.513	0.262	1
Orc6	0.0215626	0.348718	0.256	0.082	1
Col6a3	0.0216165	0.604594	0.795	0.557	1
Ndufa1	0.021617	0.346724	0.846	0.475	1
Il1b	0.0216554	-2.57496	0.154	0.344	1
Nasp	0.0219129	0.358329	0.308	0.115	1
Rpl11	0.022031	0.407889	1	0.918	1
Tsn	0.0220671	0.282448	0.718	0.393	1
Pla1a	0.0222425	-0.911653	0.154	0.328	1
Zfp451	0.0223046	0.255873	0.436	0.18	1
Ermap	0.0224034	0.357414	0.128	0.016	1
Reln	0.0224034	0.268337	0.128	0.016	1
Nxpe2	0.0224034	0.377768	0.128	0.016	1
1810058I24Rik	0.0224247	0.279905	0.667	0.361	1
Ldlr	0.0226896	0.267695	0.282	0.098	1
Siva1	0.0228044	0.402009	0.436	0.23	1
Znrd1	0.0228044	0.318237	0.462	0.213	1
Pcm1	0.0228775	0.33873	0.667	0.361	1
Bach2	0.0229974	0.463022	0.487	0.262	1
Aldh2	0.0230772	0.335659	0.974	0.607	1
Huwe1	0.0231955	0.375334	0.667	0.393	1
Arhgap15	0.0232539	0.30067	0.41	0.18	1
Samhd1	0.0233203	-0.790493	0.59	0.689	1
Tmem65	0.0233249	0.304673	0.462	0.213	1
Mrps26	0.0234512	0.301805	0.462	0.23	1
Fbl	0.0237653	0.28877	0.308	0.115	1
Cryab	0.0238091	0.25344	0.41	0.18	1
Lgals9	0.0238175	0.331198	0.641	0.328	1
Ly6d	0.0239789	0.628392	0.462	0.23	1
Slfn5	0.0243902	-0.694242	0.59	0.672	1
Ywhaz	0.0250366	0.329278	0.923	0.738	1
Cox5b	0.0251291	0.331632	0.897	0.59	1
Copa	0.0251677	0.300992	0.795	0.475	1
Ly6a	0.0256434	0.350412	0.897	0.787	1
Insig1	0.025752	0.280357	0.308	0.115	1
Pabpn1	0.0258251	0.368143	0.615	0.361	1
C1qtnf1	0.0260845	0.311607	0.462	0.213	1
Calu	0.0261413	0.405066	0.872	0.574	1
mt-Nd1	0.0262433	0.289605	1	0.951	1
Psma4	0.0262752	0.278361	0.615	0.393	1
Tram1	0.026285	0.318994	0.846	0.508	1
Man1b1	0.0264454	0.332721	0.308	0.115	1
Snhg8	0.0271252	0.340355	0.795	0.426	1
Zbtb20	0.0273591	0.401764	0.974	0.836	1
Syk	0.0273791	0.273587	0.641	0.361	1
Tubb2a	0.0274039	0.255971	0.487	0.23	1
Sulf2	0.0274709	0.335892	0.359	0.148	1
Lama2	0.0276971	0.267968	0.744	0.426	1
Ints6	0.0277902	0.356856	0.308	0.131	1
mt-Atp8	0.0279245	-0.636826	0.795	0.689	1
Ccdc80	0.0279525	0.392822	0.718	0.426	1
Get4	0.0281205	0.310068	0.256	0.082	1
Arglu1	0.0281326	0.399893	0.641	0.377	1
Loxl1	0.02815	0.274003	0.872	0.557	1
Pon2	0.0281511	-0.430489	0.128	0.295	1
Rnf10	0.0281555	0.261312	0.538	0.262	1
Ubl3	0.0281555	0.27192	0.538	0.262	1
Lin7c	0.028276	0.260211	0.333	0.131	1
Golim4	0.0284057	0.307535	0.821	0.492	1
Rpl23	0.0284688	0.33162	1	0.967	1
Srgn	0.0284965	-1.1833	0.59	0.656	1
Gars	0.0286233	0.289067	0.308	0.115	1
B230219D22Rik	0.0286699	0.292177	0.846	0.475	1
Ssr3	0.0287626	0.416924	0.718	0.443	1
Itgbl1	0.0288417	0.319852	0.154	0.033	1
Hmgcs1	0.0288946	0.256766	0.487	0.213	1
Tmed5	0.028945	0.309032	0.59	0.328	1
Eif1b	0.0290607	0.33456	0.59	0.361	1
Smc1a	0.0293085	0.331938	0.718	0.443	1
Gm5150	0.0297932	-0.303724	0	0.115	1
Psmb5	0.0298617	0.314759	0.692	0.443	1
Mocs2	0.0299413	0.466218	0.59	0.279	1
Notch1	0.0301596	0.2942	0.308	0.115	1
Cox7b	0.0301694	0.266379	0.872	0.607	1
Zfp950	0.0302793	0.264752	0.359	0.148	1
Cpsf2	0.0303408	0.276631	0.513	0.246	1
Degs1	0.0306092	0.32287	0.538	0.295	1
Pqlc3	0.0307903	-0.496484	0.103	0.262	1
Mindy2	0.0310595	0.263602	0.59	0.295	1
Cat	0.0310867	0.451795	0.462	0.213	1
Ctse	0.0311149	0.566327	0.154	0.033	1
Miat	0.0311149	0.320497	0.154	0.033	1
Oat	0.0312932	0.455177	0.718	0.426	1
Cfb	0.0316539	-0.576897	0.154	0.328	1
Cblb	0.0317974	0.272411	0.385	0.164	1
Psmb2	0.0319696	0.276574	0.641	0.361	1
Sem1	0.0322326	-0.521021	0.949	0.934	1
Rbsn	0.032308	0.276395	0.154	0.033	1
Stag1	0.0323181	0.419972	0.564	0.311	1
Mgst3	0.033044	0.509364	0.256	0.098	1
Col15a1	0.0330687	0.578874	0.179	0.049	1
H2-Eb1	0.0332192	-1.08798	0.103	0.262	1
Rps13	0.0333775	0.298388	1	0.885	1
Ptma	0.0333966	0.636398	1	0.918	1
Snrpb	0.033789	0.3436	0.795	0.508	1
Hist1h1d	0.033966	0.686183	0.256	0.098	1
Mzb1	0.0341668	0.443028	0.359	0.164	1
Mcm3	0.0342027	0.404032	0.179	0.049	1
Pbrm1	0.0342129	0.297955	0.897	0.639	1
Jmjd6	0.0344844	-0.366017	0.051	0.197	1
Usp7	0.0345679	0.264517	0.538	0.279	1
Zyg11b	0.0350726	0.272744	0.385	0.18	1
AC149090.1	0.0351161	-0.63359	0.333	0.443	1
Igfbp5	0.0351425	-0.65748	0.897	0.918	1
Tinf2	0.0353699	0.264838	0.179	0.049	1
Rps5	0.0358246	0.289795	1	0.951	1
Cpox	0.0359672	0.375783	0.205	0.066	1
Lsm4	0.036167	0.387161	0.564	0.295	1
Hibadh	0.0364007	0.253973	0.436	0.213	1
Glrx5	0.0364007	0.358186	0.436	0.213	1
Ntmt1	0.0365708	0.265709	0.179	0.049	1
Cox7a2	0.0365801	0.446399	0.897	0.689	1
P3h3	0.0366364	0.300079	0.359	0.164	1
Cox14	0.036944	0.36841	0.718	0.426	1
Fbn1	0.0372696	0.3719	0.897	0.787	1
Ube2l3	0.037426	0.327656	0.641	0.377	1
Eif2a	0.0377748	0.265298	0.513	0.262	1
Pnn	0.0377985	0.276285	0.564	0.311	1
Mgrn1	0.0378063	0.261196	0.179	0.049	1
Akirin1	0.0379521	0.266808	0.41	0.197	1
Ttc14	0.0379628	0.257359	0.744	0.393	1
Zswim6	0.0382416	0.253383	0.205	0.066	1
Syncrip	0.0385572	0.27464	0.692	0.393	1
Ywhah	0.0387196	0.296351	0.615	0.361	1
Tcf7l1	0.0387865	0.268561	0.41	0.197	1
Snrpf	0.0388381	0.312587	0.846	0.525	1
Atp5d	0.0389778	0.336716	0.795	0.508	1
Spcs2	0.0390464	0.2845	0.744	0.475	1
Nisch	0.0391368	0.318541	0.846	0.508	1
Thoc2	0.0393478	0.424477	0.641	0.361	1
Snu13	0.0393652	0.30664	0.692	0.443	1
B3gat3	0.0399721	0.268123	0.256	0.098	1
Plekha2	0.0401083	0.337401	0.462	0.23	1
Dmxl1	0.0401105	0.296684	0.513	0.262	1
Maged1	0.0402554	0.3286	0.667	0.393	1
Rps19	0.0404188	0.297965	0.974	0.967	1
Rps27a	0.0404212	0.25908	1	0.984	1
H2afz	0.0405336	0.960331	0.744	0.574	1
Ptprs	0.040907	0.256926	0.462	0.197	1
Vldlr	0.040944	0.291981	0.462	0.23	1
B2m	0.0410826	-0.574881	0.897	0.951	1
Rpl8	0.0411106	0.296602	1	0.934	1
Anp32a	0.0413205	0.289667	0.795	0.426	1
Sf3b6	0.0414269	0.282948	0.744	0.443	1
Sf3b3	0.0416806	0.265328	0.487	0.23	1
Ube2d2a	0.0417511	0.282098	0.769	0.475	1
Nhp2	0.04193	0.288697	0.385	0.18	1
Raph1	0.0421646	0.333514	0.256	0.098	1
Psd3	0.042215	0.252322	0.436	0.213	1
2310009A05Rik	0.042215	0.329341	0.436	0.213	1
Top2b	0.0423387	0.271533	0.821	0.525	1
Cwc15	0.0426681	0.269063	0.718	0.393	1
Arhgef12	0.043073	-0.500958	0.487	0.557	1
Psap	0.0430847	-0.621923	0.897	0.869	1
Zfp799	0.0431093	-0.311852	0.026	0.148	1
Mrpl2	0.0431587	0.253149	0.205	0.066	1
Gnai2	0.0431606	-0.474251	0.897	0.902	1
Runx1t1	0.0432985	0.287465	0.256	0.098	1
Slc25a37	0.0438887	0.68916	0.282	0.115	1
Chic2	0.0440871	0.387144	0.615	0.361	1
Akap9	0.0441694	0.313092	0.641	0.377	1
Selenom	0.0442114	0.351956	0.846	0.508	1
Ar	0.0445781	0.265269	0.846	0.689	1
Gsk3a	0.04464	0.25903	0.308	0.131	1
Casp1	0.0450477	-0.476513	0.077	0.213	1
Naca	0.0452699	0.252983	0.974	0.803	1
Polr2f	0.0457422	0.253878	0.564	0.311	1
Nfat5	0.0458561	0.408278	0.462	0.262	1
Cd55	0.0460952	-0.708152	0.692	0.689	1
Mrpl23	0.0461028	0.401005	0.641	0.41	1
S100a11	0.0470306	-0.718697	0.949	0.934	1
1110038F14Rik	0.0470321	0.254278	0.359	0.164	1
Ccl11	0.0476107	0.277385	0.821	0.492	1
Eef1g	0.0484949	0.333636	0.897	0.656	1
Gm4258	0.0485997	0.257614	0.205	0.066	1
Sh2b3	0.0485997	0.250132	0.205	0.066	1
Gramd3	0.0485997	0.346433	0.205	0.066	1
Hnrnpl	0.049411	0.305928	0.59	0.328	1
Htra1	0.0498195	0.278872	0.872	0.623	1
Plscr4	0.0498896	0.345634	0.385	0.18	1
Spr	0.0500055	-0.429615	0.077	0.213	1
Prdx3	0.0502644	0.277116	0.359	0.164	1
Rnps1	0.0508422	0.333951	0.385	0.197	1
Osr2	0.0511397	0.263886	0.538	0.262	1
Ctsh	0.0512322	0.30035	0.564	0.328	1
Anxa2	0.0512855	-0.382849	0.949	0.82	1
Tbca	0.0514011	0.317993	0.795	0.508	1
Dmxl2	0.0515424	-0.470511	0.051	0.18	1
Loxl2	0.0519109	0.393237	0.641	0.377	1
Jpt1	0.0519315	0.320364	0.821	0.59	1
Myh9	0.0520049	-0.943298	0.667	0.639	1
Lrmp	0.0520665	0.273616	0.385	0.18	1
Cuedc2	0.0522005	0.272504	0.41	0.197	1
Retreg2	0.0526494	-0.423278	0.077	0.213	1
Mcl1	0.0530821	-0.846297	0.744	0.721	1
Rps6	0.0531991	0.404459	0.974	0.885	1
Il11ra1	0.0532027	0.373673	0.692	0.41	1
Pax5	0.0532137	0.49004	0.359	0.18	1
Rps20	0.0536953	0.302398	1	0.967	1
Ccne2	0.0539375	0.358125	0.103	0.016	1
Rhd	0.0539375	0.587471	0.103	0.016	1
Zfp580	0.0539375	0.295793	0.103	0.016	1
Secisbp2l	0.0544018	0.27317	0.41	0.197	1
Gga1	0.0554128	-0.42244	0.077	0.213	1
Mast4	0.0555443	0.343604	0.359	0.18	1
Eps15	0.056062	0.270324	0.564	0.311	1
Cplx2	0.0561218	0.339557	0.256	0.098	1
Tspan12	0.0563103	0.250105	0.103	0.016	1
Zfp579	0.0563103	0.350482	0.103	0.016	1
Il34	0.0566592	0.298849	0.385	0.18	1
Csnk2a1	0.0570657	0.281211	0.769	0.492	1
Jaml	0.0576217	-0.592617	0.051	0.18	1
Ttc37	0.0578603	0.251356	0.308	0.131	1
H2-Ab1	0.0585863	-0.955524	0.128	0.279	1
Wwtr1	0.0586952	0.291609	0.462	0.23	1
Atxn7l3b	0.0589149	0.297109	0.846	0.623	1
Rhog	0.0591223	0.270332	0.41	0.213	1
Pla2g7	0.0592313	-0.421946	0.051	0.18	1
Zfp263	0.0597809	-0.420739	0.077	0.213	1
Rplp2	0.0601184	0.29285	1	0.918	1
Acp1	0.0604267	0.272263	0.436	0.246	1
mt-Nd4l	0.0605571	-0.436895	0.821	0.787	1
Nkap	0.0619844	0.266989	0.308	0.131	1
Bnc2	0.0625309	0.294939	0.231	0.082	1
Zfp706	0.0628051	0.274494	0.718	0.443	1
Ahctf1	0.0634558	0.273214	0.308	0.148	1
H2afv	0.0644242	0.406907	0.821	0.525	1
Ndufa11	0.0648408	0.258819	0.795	0.508	1
H2afy	0.065302	0.365759	0.667	0.41	1
Mapre2	0.0662278	0.281209	0.436	0.23	1
Ptpn1	0.0671777	-0.728638	0.308	0.393	1
Rps11	0.068245	0.273386	1	0.918	1
Trnp1	0.0687639	-0.434748	0.103	0.23	1
Rhoa	0.0690334	-0.397583	0.846	0.885	1
Krtcap2	0.0692687	0.360309	0.795	0.541	1
Gpx1	0.0693245	0.557336	0.923	0.639	1
Erp29	0.0694997	0.255958	0.897	0.557	1
Cenpe	0.0710176	0.256298	0.128	0.033	1
Fxyd5	0.0712616	-0.685626	0.333	0.475	1
Rpl22	0.0720425	0.253327	1	0.885	1
Cnp	0.0725283	0.321055	0.462	0.262	1
Slc6a6	0.073096	-0.889278	0.282	0.393	1
Rnf213	0.0732305	0.278279	0.359	0.197	1
Tomm5	0.0733312	0.258591	0.641	0.393	1
1810059H22Rik	0.0735523	0.286835	0.128	0.033	1
Stxbp6	0.0738703	0.278804	0.462	0.262	1
Mgat5	0.07438	-0.367794	0.051	0.164	1
Ppp1r12a	0.0750797	0.319237	0.615	0.393	1
Hnrnpk	0.0755057	0.343189	0.872	0.754	1
Nelfa	0.0757847	0.261251	0.282	0.131	1
Eml4	0.0759451	-0.395145	0.256	0.377	1
Trim24	0.0761634	0.313163	0.333	0.164	1
Alad	0.0775296	0.303867	0.154	0.049	1
Plk3	0.0778488	-0.716848	0.077	0.197	1
Selenok	0.0782789	0.294652	0.872	0.738	1
Ccl6	0.0785231	-1.05518	0.179	0.311	1
Pdcd4	0.079618	-0.616901	0.487	0.525	1
Serpine2	0.0802287	-0.751708	0.487	0.23	1
Arf5	0.0806213	0.308574	0.974	0.721	1
Abr	0.0806885	-0.338129	0.051	0.164	1
Snrpe	0.0814201	0.355043	0.821	0.59	1
Chd7	0.0837772	-0.553835	0.077	0.197	1
Arcn1	0.0847119	0.299847	0.564	0.361	1
Nr2f2	0.0849796	0.452736	0.154	0.049	1
AY036118	0.0850182	-0.759925	0.923	0.852	1
Serpinb1a	0.085957	0.351625	0.333	0.18	1
Clec3b	0.0863088	0.300303	0.897	0.77	1
Bicc1	0.0863486	-0.355925	0.744	0.705	1
Eif3c	0.0865733	0.285181	0.821	0.59	1
Fndc1	0.0866067	0.392562	0.872	0.705	1
Tcp1	0.0876795	0.312848	0.641	0.426	1
Ppia	0.0897135	0.326577	1	0.836	1
S1pr1	0.0897685	-0.553623	0.051	0.164	1
Dag1	0.0905086	0.275601	0.641	0.426	1
Rnf187	0.0905197	0.307362	0.462	0.279	1
Tmem131l	0.0915887	0.320205	0.385	0.213	1
Ecpas	0.0921111	0.299827	0.462	0.279	1
Smarca5	0.0923642	0.309468	0.821	0.541	1
Clec12a	0.0924192	0.339121	0.282	0.131	1
Laptm5	0.0938845	-0.811765	0.538	0.557	1
Bscl2	0.0950887	0.274284	0.282	0.148	1
Psmc6	0.0957868	0.32974	0.667	0.361	1
Vim	0.0967315	-0.514044	0.949	0.934	1
Hp	0.0970205	-0.787369	0.256	0.41	1
Rarres2	0.0975805	0.276329	0.923	0.672	1
Cxcl12	0.0977179	-0.969653	0.692	0.41	1
Emilin2	0.0979367	0.302923	0.795	0.639	1
Cyp1b1	0.0980548	-0.529558	0.179	0.295	1
Manf	0.0986704	0.376248	0.667	0.492	1
Hsp90b1	0.0995179	0.268377	0.974	0.869	1
Ighm	0.100214	0.337579	0.641	0.475	1
Aff1	0.100447	0.308351	0.308	0.164	1
Prorsd1	0.100664	0.339107	0.333	0.18	1
Gng11	0.100794	-0.319055	0.564	0.311	1
Cox6c	0.100843	0.256281	0.974	0.721	1
Fstl1	0.100979	0.257357	0.923	0.902	1
Omd	0.101387	-0.335708	0.231	0.098	1
Ltb	0.101426	-0.566233	0.205	0.328	1
Kctd6	0.101552	-0.272996	0.026	0.115	1
Trp53rkb	0.101556	-0.329743	0.026	0.115	1
Mob3c	0.101556	-0.373702	0.026	0.115	1
Zfp90	0.101556	-0.307435	0.026	0.115	1
AU041133	0.101556	-0.277605	0.026	0.115	1
S1pr3	0.101556	-0.337631	0.026	0.115	1
Ephx1	0.10176	0.279322	0.385	0.197	1
Col4a1	0.10202	0.318532	0.615	0.393	1
Opcml	0.102821	0.265051	0.59	0.41	1
2310001H17Rik	0.104549	-0.572591	0.154	0.262	1
Lrpap1	0.105082	0.306782	0.487	0.279	1
Foxc1	0.107986	-0.325983	0.026	0.115	1
Pkig	0.108341	0.256327	0.436	0.262	1
Ppt1	0.108782	-0.494342	0.154	0.262	1
Csf3r	0.108782	-1.11817	0.154	0.262	1
Calr	0.109199	0.443968	0.897	0.77	1
Pram1	0.109541	-0.421869	0.051	0.148	1
Set	0.109867	0.277505	0.872	0.639	1
Gda	0.110362	-0.494481	0.564	0.607	1
Gab2	0.11132	-0.304911	0.026	0.115	1
Ccl7	0.112319	-0.666855	0.103	0.23	1
D10Wsu102e	0.112405	-0.561629	0.103	0.213	1
Id2	0.113013	0.289306	0.462	0.279	1
Man2b1	0.113783	-0.421964	0.385	0.459	1
Myoc	0.114106	-1.48803	0.179	0.295	1
Wwp1	0.11533	-0.523883	0.256	0.361	1
H2-Aa	0.115384	-1.16337	0.154	0.262	1
Ackr4	0.115432	-0.386313	0.051	0.148	1
Nsg1	0.117805	-0.413178	0.205	0.311	1
Tec	0.11847	-0.389766	0.051	0.148	1
Cdk6	0.119245	-0.428309	0.077	0.18	1
Acod1	0.119245	-0.683176	0.077	0.18	1
Gadd45g	0.119264	0.283635	0.282	0.148	1
Actg1	0.121703	-0.572564	1	1	1
Inf2	0.121809	-0.25399	0.026	0.115	1
Il1rn	0.122047	-0.460327	0.077	0.18	1
Il6ra	0.122872	-0.403738	0.179	0.295	1
Chil3	0.123535	1.72697	0.179	0.082	1
Nnmt	0.123955	0.281729	0.308	0.148	1
Isg15	0.12431	0.277301	0.359	0.213	1
Phyh	0.124827	-0.502413	0.205	0.295	1
Aldh1a3	0.124921	-0.351718	0.436	0.213	1
Auts2	0.127839	-0.404856	0.103	0.213	1
Ccn5	0.127959	-0.472349	0.051	0.148	1
Sell	0.128214	-0.935542	0.282	0.361	1
Nr4a1	0.128214	0.656571	0.436	0.262	1
Zeb2	0.128438	-0.504729	0.872	0.787	1
Ifi27l2a	0.128771	0.258072	0.923	0.787	1
Ier3ip1	0.128852	-0.527328	0.718	0.639	1
Fbln2	0.129636	-0.603958	0.641	0.59	1
Rps16	0.130437	0.251252	1	0.934	1
Abcc9	0.130564	0.475153	0.256	0.115	1
Trim30b	0.130764	-0.41804	0.077	0.18	1
Gm26532	0.131092	0.445255	0.359	0.213	1
Diaph1	0.131767	-0.607366	0.462	0.525	1
Fech	0.133583	0.308797	0.333	0.18	1
Tmem176a	0.133775	-0.583854	0.077	0.18	1
Dennd5b	0.133775	-0.327655	0.077	0.18	1
Gid4	0.133775	-0.321771	0.077	0.18	1
Selenoh	0.133811	0.37134	0.385	0.23	1
Mob4	0.135351	0.253799	0.487	0.295	1
Tbc1d2b	0.136044	-0.328065	0.179	0.279	1
Col4a4	0.136978	0.366177	0.128	0.049	1
Atp6v1b2	0.136998	-0.401594	0.179	0.295	1
H2-K1	0.137455	-0.46849	0.897	0.869	1
Mmp9	0.138157	-1.14901	0.205	0.311	1
Pir	0.139956	-0.258097	0.077	0.18	1
Psenen	0.140595	-0.340636	0.692	0.623	1
Penk	0.140786	0.261148	0.154	0.066	1
Ralgps2	0.14107	0.367998	0.333	0.18	1
Prkcd	0.141377	-0.729374	0.205	0.295	1
Uhrf1	0.142121	0.307124	0.103	0.033	1
Golph3	0.143873	-0.532927	0.205	0.295	1
Mindy1	0.144215	-0.442926	0.308	0.393	1
Ctsb	0.145877	-0.382239	0.872	0.852	1
Anxa6	0.146491	-0.482911	0.308	0.377	1
Irf1	0.147392	0.736765	0.41	0.246	1
Parp4	0.148085	-0.388582	0.231	0.328	1
Vit	0.148366	-0.416915	0.128	0.23	1
Rag1	0.149281	0.41602	0.128	0.049	1
Lpl	0.150071	0.744759	0.795	0.508	1
Ss18	0.151287	-0.331216	0.128	0.23	1
Pfdn1	0.151316	-0.443863	0.385	0.426	1
H19	0.151686	0.876177	0.103	0.033	1
Nabp1	0.153205	-0.255563	0.333	0.164	1
Lrrc8d	0.15425	-0.329437	0.128	0.23	1
Atp5j	0.155504	0.27001	0.821	0.672	1
Cebpe	0.156025	0.316341	0.154	0.066	1
Epyc	0.156649	0.269913	0.103	0.033	1
Klhl5	0.158007	-0.344498	0.103	0.197	1
Itgb7	0.158007	-0.403271	0.103	0.197	1
Slc16a3	0.15892	-1.00247	0.154	0.262	1
Atpif1	0.159662	0.71726	0.821	0.607	1
Ppp4r3b	0.160061	-0.497727	0.41	0.459	1
Themis2	0.160688	-0.450059	0.077	0.164	1
Plek	0.160846	-0.645856	0.231	0.328	1
Pim1	0.16114	-1.08678	0.538	0.508	1
Blmh	0.16319	-0.517835	0.282	0.361	1
Zfp101	0.164098	0.252436	0.154	0.066	1
Cdh2	0.164098	-0.510112	0.051	0.131	1
Tctex1d2	0.164326	-0.313567	0.077	0.164	1
Ikbkb	0.16435	0.252121	0.41	0.23	1
H2-D1	0.165552	-0.594519	0.949	0.82	1
Wtap	0.165677	0.253605	0.385	0.246	1
Ift52	0.166935	-0.338849	0.128	0.213	1
Rgs16	0.166943	0.588556	0.103	0.033	1
Kcnj8	0.166975	0.297524	0.128	0.049	1
Arhgef17	0.166975	0.252047	0.128	0.049	1
Slfn1	0.167715	-0.638043	0.154	0.246	1
Etv3	0.168026	-0.312828	0.077	0.164	1
Hcar2	0.168026	-0.766761	0.077	0.164	1
Acox3	0.168251	-0.283855	0.051	0.131	1
Wdr37	0.168251	-0.326923	0.051	0.131	1
Wipf1	0.169643	-0.410998	0.59	0.574	1
Lsm5	0.169829	0.277957	0.487	0.344	1
Igfbp4	0.169911	-0.633259	0.897	0.852	1
Bod1l	0.170561	-0.497632	0.436	0.475	1
Fyb	0.172203	-0.594122	0.205	0.311	1
Gdpd3	0.172483	-0.286901	0.051	0.131	1
Zic4	0.172483	-0.337333	0.051	0.131	1
Itga5	0.172483	-0.399861	0.051	0.131	1
Nmt1	0.172956	-0.426182	0.333	0.393	1
Dpysl2	0.173291	0.263729	0.615	0.443	1
Fes	0.174273	-0.308448	0.179	0.279	1
Txnip	0.174775	-0.427234	0.795	0.77	1
Cxcl13	0.175062	0.267397	0.359	0.213	1
Il15ra	0.176793	-0.348935	0.051	0.131	1
Arhgef25	0.177078	-0.291403	0.154	0.246	1
Mapkapk2	0.179467	-0.471409	0.205	0.295	1
Poc1b	0.1795	-0.284985	0.077	0.164	1
Csnk1g3	0.18066	0.253944	0.538	0.361	1
Lrrk1	0.182455	-0.28374	0.205	0.295	1
Cir1	0.184195	-0.429747	0.333	0.41	1
Zc3h15	0.18551	-0.398927	0.538	0.541	1
Mat2b	0.185813	-0.448832	0.41	0.443	1
Sqstm1	0.186142	-0.297263	0.487	0.508	1
Cxcr2	0.186824	-0.804273	0.154	0.246	1
Slpi	0.187291	-0.743717	0.256	0.361	1
Rpl22l1	0.18779	0.272886	0.949	0.77	1
March8	0.18947	-0.273375	0.103	0.197	1
Tagln2	0.189876	0.343689	0.769	0.475	1
Zzef1	0.19016	-0.301168	0.154	0.246	1
Ecrg4	0.190206	0.767598	0.154	0.066	1
Pwwp3a	0.194385	-0.33101	0.128	0.213	1
Vasp	0.194654	-0.50575	0.359	0.426	1
Ptprc	0.194894	-0.705551	0.564	0.59	1
Rnd3	0.195556	-0.427775	0.231	0.311	1
2410006H16Rik	0.197165	-0.435249	0.615	0.607	1
Ube2i	0.197451	0.2732	0.641	0.443	1
Ptgs2	0.19998	-0.418048	0.231	0.344	1
Amn1	0.200494	0.269732	0.256	0.148	1
Hopx	0.200922	-0.326099	0.103	0.197	1
Cacfd1	0.201738	-0.405822	0.128	0.213	1
Cd109	0.20394	-0.271349	0.154	0.246	1
Osr1	0.203971	-0.532159	0.436	0.475	1
Hdc	0.206229	-1.16194	0.205	0.279	1
Dhx40	0.206229	-0.30265	0.205	0.279	1
Podn	0.206677	-0.364103	0.103	0.18	1
Crebl2	0.206677	-0.372095	0.103	0.18	1
2310010J17Rik	0.207496	0.366593	0.282	0.164	1
Ifitm1	0.211096	-0.816299	0.154	0.246	1
Mfsd6	0.213145	-0.319853	0.128	0.213	1
Iqgap1	0.214617	-0.349219	0.872	0.77	1
Ptprd	0.214911	-0.379238	0.231	0.115	1
Glud1	0.217698	-0.303629	0.897	0.787	1
Mycbp2	0.218182	-0.56561	0.692	0.557	1
Nudcd3	0.219026	-0.420492	0.436	0.426	1
Mxd1	0.220598	-1.13293	0.256	0.328	1
Dbnl	0.221975	-0.35433	0.41	0.443	1
Vgll3	0.222142	-0.749007	0.385	0.426	1
Fermt2	0.222431	-0.278746	0.667	0.393	1
Ptx3	0.222851	-0.662755	0.154	0.23	1
Zfp758	0.224536	-0.31896	0.077	0.148	1
Tbc1d10c	0.224536	-0.344466	0.077	0.148	1
Retnlg	0.224951	-1.11132	0.308	0.393	1
Fam124a	0.227033	-0.281519	0.256	0.131	1
Daglb	0.22717	-0.665784	0.256	0.361	1
Sugt1	0.229125	-0.260063	0.641	0.361	1
Irf3	0.230642	-0.542016	0.128	0.197	1
Cwf19l2	0.231071	-0.447627	0.359	0.41	1
Arhgdib	0.231542	0.348412	0.769	0.623	1
Cd69	0.232283	-0.456826	0.103	0.18	1
Ccl8	0.234238	-0.492755	0.077	0.148	1
Elk1	0.234238	-0.303573	0.077	0.148	1
Prkar1a	0.235773	-0.323224	0.692	0.672	1
Ssh2	0.236436	-0.399236	0.538	0.508	1
Tpd52	0.236753	-0.420852	0.282	0.361	1
Il1f9	0.236761	-0.474336	0.103	0.18	1
Cenpa	0.236761	0.294023	0.205	0.115	1
Nsmaf	0.239199	-0.288635	0.077	0.148	1
Dek	0.239589	0.601012	0.744	0.508	1
Trib1	0.240118	-0.288593	0.256	0.377	1
Rab24	0.240859	-0.681348	0.282	0.328	1
Errfi1	0.241207	0.427726	0.564	0.41	1
Pex3	0.241299	-0.398709	0.103	0.18	1
Sirpb1b	0.243084	-0.288409	0.051	0.115	1
Lilra6	0.243084	-0.313004	0.051	0.115	1
Thrb	0.243084	-0.421222	0.051	0.115	1
Arvcf	0.243084	-0.267141	0.051	0.115	1
H2-DMb2	0.243084	-0.308627	0.051	0.115	1
Btg1	0.243137	-0.496269	0.821	0.787	1
Ncf2	0.243243	-0.420014	0.308	0.41	1
Slco3a1	0.243836	-0.528858	0.359	0.41	1
Rab35	0.244376	-0.402509	0.256	0.311	1
Vat1	0.247212	-0.551039	0.615	0.574	1
Ankrd33b	0.248879	-0.385914	0.051	0.115	1
Hmgn2	0.249126	0.533909	0.308	0.213	1
Actl6a	0.251821	0.26816	0.256	0.148	1
Arhgef1	0.25363	-0.447461	0.41	0.41	1
Mvb12a	0.253985	-0.289208	0.179	0.262	1
Rab29	0.25477	-0.253794	0.051	0.115	1
Ccl9	0.25477	-0.640111	0.051	0.115	1
Mylk	0.25477	-0.380798	0.051	0.115	1
C4b	0.254975	-0.319774	0.256	0.344	1
Tmem258	0.255683	0.289734	0.718	0.541	1
Fmnl1	0.256319	-0.39089	0.282	0.344	1
Dennd1b	0.258109	-0.526398	0.179	0.246	1
Slfn4	0.259782	-0.353691	0.077	0.148	1
Irak4	0.26139	-0.272824	0.128	0.197	1
Prss23	0.262013	-0.308258	0.923	0.82	1
Smim4	0.262578	-0.375729	0.256	0.328	1
Selplg	0.262704	-0.728091	0.256	0.311	1
Zcchc24	0.264665	-0.696022	0.513	0.475	1
Lyz2	0.265548	-0.466483	0.308	0.426	1
Dmkn	0.266004	-0.634704	0.128	0.197	1
Arl6ip1	0.268478	-0.30673	0.769	0.754	1
Fkbp8	0.272329	-0.493944	0.487	0.475	1
Cdh11	0.273519	-0.528725	0.205	0.295	1
Lrch4	0.273812	-0.362849	0.154	0.213	1
Esco1	0.273816	-0.467137	0.154	0.213	1
Sgsm2	0.274888	-0.295826	0.179	0.246	1
Camp	0.274941	1.68709	0.256	0.18	1
Fpr2	0.275399	-0.395064	0.128	0.197	1
Igfbp3	0.28098	-0.599714	0.333	0.197	1
Snd1	0.28297	-0.302841	0.154	0.213	1
1810013L24Rik	0.283799	-0.281942	0.103	0.164	1
Acta2	0.285672	-1.40688	0.051	0.115	1
Chmp4b	0.286777	-0.379987	0.487	0.508	1
Dbi	0.287569	-0.582248	0.821	0.557	1
Babam2	0.287625	-0.254555	0.154	0.213	1
Trim12a	0.29199	-0.468609	0.333	0.361	1
Ptpn12	0.293608	-0.268074	0.205	0.279	1
2210016F16Rik	0.294456	-0.271209	0.103	0.164	1
Il17rd	0.294456	-0.312765	0.103	0.164	1
Egln2	0.294861	-0.29605	0.128	0.197	1
Arhgap9	0.297351	-0.711802	0.179	0.23	1
Naa35	0.298037	-0.361396	0.256	0.311	1
Tnfaip6	0.299506	-0.45841	0.385	0.246	1
Gas6	0.299786	-1.09008	0.154	0.23	1
Lyst	0.299805	-0.515808	0.385	0.393	1
Fam98c	0.299884	-0.27526	0.103	0.164	1
Grina	0.301186	-0.287578	0.692	0.443	1
Ppp1r9b	0.301556	-0.376277	0.205	0.262	1
Gnb2	0.301648	-0.381032	0.897	0.852	1
Anxa1	0.301648	0.295906	0.949	0.82	1
Spty2d1	0.30185	-0.456809	0.359	0.361	1
Adamts15	0.302545	-0.547317	0.256	0.295	1
Vcp	0.302883	-0.296023	0.744	0.689	1
Zc3hav1	0.30478	-0.341536	0.282	0.328	1
Lilr4b	0.309102	-0.675805	0.231	0.279	1
Gpnmb	0.310471	-0.486879	0.205	0.262	1
Ust	0.311668	-0.386449	0.154	0.213	1
Auh	0.311668	-0.320019	0.154	0.213	1
Plxnd1	0.31416	0.310905	0.103	0.049	1
Vta1	0.316631	-0.343797	0.154	0.213	1
Pirb	0.317901	-0.461436	0.231	0.279	1
Lcp1	0.318761	-0.821647	0.462	0.459	1
Bet1l	0.319129	-0.357294	0.436	0.443	1
Ackr3	0.319238	-0.329085	0.769	0.475	1
Rbpj	0.320043	-0.402053	0.59	0.557	1
Cyp4f18	0.320951	-0.432849	0.179	0.23	1
Dact2	0.320951	-0.279119	0.282	0.164	1
Cpe	0.321903	0.358167	0.103	0.049	1
Rbbp5	0.322772	-0.308549	0.077	0.131	1
Rgs3	0.322772	-0.483739	0.077	0.131	1
Tom1	0.322772	-0.329307	0.077	0.131	1
Ide	0.323957	-0.391926	0.256	0.295	1
Acp2	0.324381	-0.435467	0.128	0.18	1
Arhgap45	0.324534	-0.435011	0.282	0.311	1
Creb3l2	0.325549	-0.333217	0.282	0.328	1
Ppp2r5c	0.325596	-0.324059	0.41	0.41	1
Ppp1r2	0.326432	-0.429479	0.692	0.574	1
Alox5ap	0.32668	-0.487965	0.256	0.328	1
Myl9	0.327326	-0.702878	0.179	0.098	1
Rock2	0.328254	-0.425514	0.897	0.787	1
Mfap4	0.328741	0.810014	0.077	0.148	1
Junb	0.329195	-0.391019	0.718	0.672	1
Cep120	0.329847	-0.316523	0.128	0.18	1
Tmem176b	0.334004	-0.620045	0.154	0.23	1
Fam43a	0.335669	-0.263566	0.077	0.131	1
Utp11	0.335801	-0.326709	0.333	0.361	1
Ubn2	0.338546	-0.312572	0.41	0.426	1
Dusp1	0.339234	-0.419618	0.692	0.672	1
Numa1	0.339519	-0.276968	0.41	0.443	1
Bgn	0.342237	-0.472857	0.333	0.443	1
Nt5e	0.342241	-0.329153	0.077	0.131	1
Psmg1	0.342241	-0.264691	0.077	0.131	1
C3	0.342468	-0.304931	0.846	0.82	1
Myo1e	0.345742	-0.336162	0.179	0.23	1
H2-Q7	0.345742	-0.650464	0.179	0.23	1
Hsph1	0.348894	-0.464816	0.077	0.131	1
S100a9	0.350477	-0.388146	0.641	0.639	1
Mt2	0.350654	-1.02513	0.487	0.492	1
Lifr	0.351721	-0.403468	0.103	0.164	1
Ppfibp1	0.352644	-0.440272	0.436	0.41	1
Rnf220	0.352818	-0.360089	0.154	0.213	1
Sytl2	0.352818	-0.278952	0.256	0.148	1
Fst	0.355406	-0.339958	0.385	0.246	1
Fosb	0.355591	0.289098	0.513	0.377	1
Irak1bp1	0.355628	-0.254469	0.077	0.131	1
Akap7	0.355628	-0.260581	0.077	0.131	1
Hexb	0.356471	-0.25321	0.487	0.295	1
Nfya	0.35819	-0.2534	0.154	0.213	1
Hes1	0.358193	-0.561027	0.154	0.213	1
Ifngr1	0.358441	-0.549291	0.795	0.623	1
Flrt2	0.358671	-0.689523	0.513	0.492	1
Naaa	0.358708	-0.302217	0.385	0.41	1
Nsa2	0.359025	-0.32495	0.897	0.689	1
9930111J21Rik2	0.359963	-0.443092	0.282	0.311	1
Fam32a	0.361601	-0.346769	0.462	0.459	1
Mfn2	0.363619	-0.284183	0.154	0.213	1
H2afj	0.363701	-0.338563	0.667	0.623	1
Pth1r	0.363887	-0.623482	0.128	0.18	1
Cd300a	0.363887	-0.316953	0.128	0.18	1
Wls	0.366566	-0.558128	0.718	0.607	1
Nfkbia	0.370363	-0.452585	0.641	0.459	1
Pmepa1	0.37041	-0.682239	0.513	0.459	1
Gsn	0.371335	0.263483	1	0.967	1
Sfrp4	0.373091	-0.357654	0.487	0.311	1
Nek7	0.374098	-0.31131	0.231	0.279	1
Ndrg1	0.374403	-0.513773	0.282	0.328	1
Specc1l	0.377829	-0.372163	0.205	0.246	1
Sqor	0.378555	-0.353816	0.282	0.311	1
Anpep	0.379059	-0.390502	0.282	0.328	1
Wdr45	0.381702	-0.289851	0.128	0.18	1
Galnt11	0.382309	-0.443051	0.231	0.262	1
Dact3	0.38338	-0.314822	0.077	0.131	1
Arid4a	0.384052	-0.297362	0.359	0.393	1
Rars	0.384071	-0.339123	0.154	0.197	1
Tnfaip2	0.386526	-0.717063	0.564	0.508	1
Nr1h2	0.387393	-0.325532	0.231	0.262	1
Sod3	0.388491	-0.444721	0.359	0.393	1
Lbp	0.388685	-0.282433	0.41	0.279	1
Lmna	0.388836	-0.453347	0.538	0.508	1
Cct7	0.390267	-0.276097	0.462	0.443	1
Yy1	0.391088	-0.339472	0.564	0.475	1
Cygb	0.39154	-0.380121	0.333	0.393	1
Fcer1g	0.392757	-0.868465	0.333	0.361	1
Pptc7	0.39387	-0.269808	0.128	0.18	1
Zfp36	0.393963	0.370771	0.615	0.508	1
Lrp1	0.394225	-0.317165	0.872	0.738	1
Impa1	0.395418	-0.342909	0.256	0.279	1
Gfod1	0.397277	-0.506902	0.103	0.148	1
Fndc3a	0.397553	-0.325571	0.385	0.41	1
Crlf2	0.39768	-0.332582	0.231	0.262	1
Mkrn1	0.398054	-0.253163	0.308	0.344	1
Mcemp1	0.398928	-0.687147	0.256	0.295	1
Ik	0.39921	-0.339602	0.462	0.459	1
F630028O10Rik	0.399601	0.331901	0.205	0.148	1
Gpsm3	0.400581	-0.455936	0.436	0.443	1
Cavin1	0.400976	-0.331127	0.872	0.787	1
Mbp	0.403029	0.37675	0.231	0.164	1
Nfam1	0.404369	-0.40863	0.231	0.279	1
Slc7a11	0.406271	-0.408409	0.128	0.18	1
Pitpna	0.406418	-0.266906	0.59	0.525	1
Mgat1	0.407108	-0.352351	0.282	0.295	1
Cebpd	0.407842	-0.357245	0.795	0.59	1
Lilrb4a	0.409552	-0.550606	0.231	0.279	1
Arhgap10	0.416745	-0.400223	0.333	0.344	1
Pxn	0.417572	-0.481292	0.308	0.311	1
Iglc2	0.419259	0.467584	0.179	0.131	1
AB124611	0.420038	-0.25193	0.231	0.279	1
Ece1	0.422063	-0.283439	0.308	0.344	1
Tmem127	0.425339	-0.250064	0.231	0.279	1
Atp9b	0.425703	-0.264636	0.154	0.197	1
Tpm1	0.430024	-1.04986	0.487	0.492	1
Stk17b	0.432353	-0.344246	0.487	0.475	1
Ptpn18	0.434476	-0.294982	0.333	0.377	1
Npc2	0.435368	-0.262388	0.846	0.787	1
Gspt1	0.435419	-0.345681	0.333	0.361	1
Pbx1	0.437564	-0.435108	0.667	0.541	1
Slc2a3	0.438065	-0.524644	0.154	0.197	1
Wwp2	0.438065	-0.315194	0.154	0.197	1
Pqlc1	0.438065	-0.281048	0.154	0.197	1
Slc15a3	0.438276	-0.390925	0.128	0.18	1
Tap2	0.439139	-0.405274	0.231	0.246	1
Zfp68	0.441204	-0.334235	0.282	0.18	1
Nbl1	0.44123	-0.377246	0.744	0.623	1
Cops8	0.442001	-0.380878	0.179	0.213	1
Mdm2	0.442001	-0.301294	0.179	0.213	1
Ccni	0.442488	-0.303614	0.41	0.426	1
Cd52	0.443867	-0.730578	0.744	0.59	1
Tmsb4x	0.445324	-0.272359	1	0.967	1
S100a8	0.446259	-0.271782	0.59	0.59	1
Gpi1	0.446403	-0.271924	0.538	0.525	1
Crip1	0.449474	-0.392608	1	0.885	1
Col12a1	0.451469	-0.438995	0.128	0.18	1
Slit2	0.451472	-0.366326	0.128	0.18	1
Sorl1	0.452612	-0.263516	0.282	0.344	1
Cant1	0.452757	-0.531399	0.128	0.164	1
Apopt1	0.453089	-0.263934	0.308	0.311	1
Usf2	0.457036	-0.335631	0.462	0.41	1
Mustn1	0.46036	-0.51298	0.513	0.328	1
Ppp1r3b	0.460722	-0.268863	0.103	0.148	1
Syne2	0.461284	-0.46279	0.333	0.344	1
Hnrnpul2	0.46304	-0.309713	0.564	0.541	1
Tpm2	0.463534	-0.523973	0.077	0.115	1
Tk2	0.463534	-0.35267	0.077	0.115	1
Igf1r	0.465794	-0.317536	0.41	0.41	1
Mrgpra2b	0.468105	-0.28438	0.103	0.148	1
Prrc2b	0.468296	-0.360984	0.538	0.475	1
Ngp	0.468487	1.21635	0.282	0.23	1
Clmp	0.468818	-0.335969	0.308	0.311	1
Iars2	0.469519	-0.376257	0.256	0.279	1
Fxyd1	0.471686	-0.431429	0.769	0.607	1
Cd93	0.471854	-0.251977	0.077	0.115	1
Slfn8	0.471854	-0.270077	0.077	0.115	1
Wfdc17	0.471854	-0.546288	0.077	0.115	1
Mtr	0.471854	-0.27847	0.077	0.115	1
Cnn2	0.47255	-0.731853	0.333	0.328	1
Gm5617	0.47356	-0.372671	0.128	0.164	1
Fam129a	0.474792	-0.421107	0.538	0.492	1
Ltbp3	0.479967	-0.312643	0.308	0.213	1
Akap11	0.481355	-0.281281	0.41	0.262	1
Pbxip1	0.483551	-0.316741	0.487	0.443	1
U2af2	0.484014	-0.467356	0.333	0.311	1
Ssc5d	0.485774	-0.335571	0.205	0.23	1
Map3k1	0.48832	-0.310759	0.333	0.328	1
Ccr2	0.488739	-0.781182	0.077	0.115	1
Ccn3	0.490382	-1.04403	0.436	0.393	1
Clip1	0.491024	-0.35032	0.359	0.344	1
Rxylt1	0.493639	-0.289879	0.333	0.328	1
Ccnd1	0.494878	-0.388367	0.128	0.164	1
Ppl	0.494878	-0.380702	0.128	0.164	1
Gtpbp8	0.494878	-0.262155	0.128	0.164	1
Cd74	0.495692	-1.31035	0.308	0.311	1
Mpdz	0.496261	-0.275411	0.359	0.344	1
Mark2	0.496397	-0.399895	0.385	0.377	1
Psma7	0.497115	-0.26799	0.718	0.656	1
Ppdpf	0.497316	-0.460559	0.359	0.361	1
Nampt	0.497689	-0.499972	0.333	0.344	1
Zhx1	0.498058	-0.27712	0.205	0.23	1
Il33	0.499575	-0.277691	0.462	0.344	1
Pdgfrb	0.501529	-0.407839	0.359	0.344	1
Bank1	0.502097	-0.403721	0.128	0.164	1
Eid2	0.502097	-0.264628	0.128	0.164	1
Atf3	0.503193	-0.323037	0.333	0.246	1
Krtdap	0.503382	-0.596458	0.231	0.262	1
Klf6	0.504228	-0.567719	0.846	0.738	1
Fhl2	0.505944	-0.347916	0.077	0.115	1
Txndc15	0.506667	-0.417737	0.308	0.311	1
Hmgb2	0.507526	0.832966	0.769	0.656	1
Prr13	0.507902	-0.321382	0.436	0.475	1
Ccdc88c	0.508902	-0.352773	0.282	0.279	1
Plekhf1	0.509371	-0.283946	0.128	0.164	1
Cplane1	0.509371	-0.295022	0.128	0.164	1
Tap1	0.509781	-0.28415	0.333	0.328	1
Gm26917	0.510052	-0.378995	0.487	0.459	1
Lepr	0.516699	-0.297723	0.128	0.164	1
Hcfc1r1	0.52036	-0.308956	0.641	0.574	1
Chd8	0.520561	-0.259258	0.41	0.393	1
Bola2	0.5208	-0.30399	0.462	0.426	1
Ogdh	0.52289	-0.375022	0.359	0.344	1
Clu	0.524027	-1.15615	0.154	0.18	1
Gabra3	0.527222	-0.318033	0.256	0.164	1
Pttg1ip	0.527495	-0.28108	0.667	0.557	1
Mapk3	0.529115	-0.281334	0.359	0.361	1
Slc4a2	0.531085	-0.298095	0.154	0.18	1
Glipr2	0.533043	-0.480068	0.308	0.295	1
Mvp	0.533477	-0.295155	0.231	0.262	1
Cd53	0.534654	-0.44189	0.308	0.311	1
Tesk1	0.53539	-0.257715	0.103	0.131	1
Cebpg	0.539547	-0.35046	0.282	0.197	1
Preb	0.540342	-0.341315	0.333	0.295	1
R3hdm2	0.540496	-0.408079	0.513	0.426	1
Pde4b	0.540583	-0.333188	0.231	0.148	1
Rasgrp4	0.543667	-0.41852	0.103	0.131	1
Hspa1b	0.543667	-0.286213	0.103	0.131	1
Dusp11	0.544609	-0.351672	0.641	0.508	1
Gpam	0.552006	-0.341115	0.103	0.131	1
Hccs	0.552006	-0.3211	0.103	0.131	1
Ddhd2	0.555319	-0.369479	0.205	0.23	1
Coro1c	0.555769	-0.313814	0.282	0.279	1
Pik3cg	0.556228	-0.399142	0.179	0.197	1
Cd99l2	0.556228	-0.357943	0.179	0.197	1
Serp1	0.556323	-0.345331	0.718	0.672	1
Coro1a	0.556848	-0.36846	0.59	0.574	1
Hebp2	0.558159	-0.258866	0.256	0.18	1
Grk6	0.558159	-0.280543	0.205	0.213	1
Osm	0.558722	-0.418398	0.205	0.246	1
Timm29	0.560408	-0.388403	0.103	0.131	1
Glipr1	0.560408	-0.328523	0.103	0.131	1
Ier3	0.561875	-0.69225	0.205	0.23	1
Ptgis	0.561917	-0.559453	0.462	0.295	1
Smarcd2	0.562852	-0.289608	0.256	0.279	1
Ifitm2	0.564112	-0.318172	0.974	0.787	1
Mmp19	0.568581	-0.270404	0.128	0.082	1
Cd84	0.570166	-0.552005	0.179	0.197	1
Erich1	0.574419	-0.285088	0.154	0.18	1
Esyt2	0.575567	-0.339341	0.59	0.492	1
Nap1l1	0.575691	-0.263896	0.769	0.721	1
Fn1	0.575867	-0.477253	0.897	0.803	1
Cap1	0.576041	-0.262439	0.59	0.393	1
Ltbp4	0.576858	-0.252243	0.282	0.311	1
Dctn6	0.579839	-0.341331	0.308	0.295	1
Taf11	0.579967	-0.25616	0.282	0.279	1
Btg2	0.580565	-0.255568	0.872	0.656	1
Midn	0.580999	-0.261829	0.385	0.262	1
Drap1	0.581765	-0.312806	0.641	0.541	1
Arhgef28	0.58427	-0.294315	0.179	0.197	1
Polk	0.585979	-0.289175	0.103	0.131	1
Rbmx	0.585979	-0.256253	0.103	0.131	1
Hsbp1	0.586463	-0.354226	0.718	0.574	1
Hspb1	0.588464	-0.42517	0.205	0.23	1
Cdk2ap2	0.590787	-0.327901	0.615	0.541	1
Tmem30a	0.593543	-0.255518	0.615	0.508	1
Treml2	0.596696	-0.33049	0.154	0.18	1
Crnkl1	0.596705	-0.300281	0.282	0.295	1
Ap1s2	0.598035	-0.292609	0.231	0.23	1
Zbtb44	0.598434	-0.402584	0.282	0.279	1
Iqgap2	0.598533	-0.280225	0.179	0.197	1
Paf1	0.598869	-0.355562	0.205	0.213	1
Apod	0.600011	-0.770029	0.667	0.459	1
Ctnnd1	0.600901	-0.310424	0.385	0.246	1
Rpn1	0.600999	-0.359587	0.641	0.525	1
Samsn1	0.601973	-0.298351	0.205	0.23	1
Mcur1	0.605783	-0.250043	0.205	0.213	1
Aamp	0.609466	-0.279238	0.462	0.443	1
Tsen34	0.609466	-0.270171	0.487	0.426	1
Cbl	0.609466	-0.312723	0.564	0.377	1
Sult5a1	0.610888	-0.326432	0.385	0.262	1
Cfap36	0.611414	-0.364833	0.231	0.23	1
Ube2q1	0.612112	-0.280637	0.41	0.279	1
Lmo4	0.613323	-0.303987	0.718	0.508	1
Smim11	0.61422	-0.405666	0.615	0.508	1
Srpk2	0.616507	-0.283495	0.538	0.459	1
Nfatc3	0.617164	-0.271468	0.282	0.279	1
Cybb	0.618054	-0.329708	0.308	0.344	1
Slc25a24	0.618641	-0.33451	0.462	0.311	1
S100a4	0.618677	-0.929678	0.359	0.361	1
Abca1	0.620249	-0.502047	0.538	0.443	1
Setd1b	0.620585	-0.412214	0.333	0.311	1
Cfh	0.621579	-0.792538	0.436	0.311	1
F5	0.62273	-0.418678	0.128	0.148	1
Epn2	0.623463	-0.377115	0.282	0.279	1
Ralbp1	0.626485	-0.269659	0.872	0.721	1
Tet2	0.627523	-0.384566	0.179	0.197	1
Eif2ak3	0.627523	-0.263563	0.179	0.197	1
Ypel3	0.629647	-0.281448	0.795	0.59	1
Tyrobp	0.630879	-0.583949	0.436	0.41	1
Igkc	0.636002	-3.23984	0.359	0.377	1
Fcgr3	0.639387	-0.295375	0.128	0.148	1
Clcc1	0.639387	-0.299669	0.128	0.148	1
Slc39a1	0.640902	-0.300758	0.308	0.295	1
Bach1	0.642141	-0.274524	0.256	0.246	1
Pdlim4	0.64224	-0.409722	0.179	0.197	1
Lrg1	0.642387	-0.592821	0.154	0.18	1
Ptpra	0.644516	-0.382483	0.718	0.508	1
Map3k8	0.645855	-0.33209	0.154	0.164	1
Nagk	0.647625	-0.269123	0.385	0.262	1
Anapc4	0.647784	-0.251899	0.128	0.148	1
Slco2a1	0.649652	-0.344976	0.231	0.164	1
Slc35a5	0.649652	-0.318147	0.231	0.164	1
Mpeg1	0.650142	-0.256213	0.154	0.18	1
Bst2	0.650639	-0.473353	0.641	0.574	1
C1s1	0.652955	-0.384072	0.846	0.656	1
Fam107b	0.654112	-0.412477	0.359	0.344	1
Map7d1	0.654222	-0.309814	0.41	0.279	1
Dhrs7	0.655058	-0.357175	0.641	0.557	1
Rassf3	0.655511	-0.505302	0.256	0.246	1
Kpnb1	0.656068	-0.397232	0.487	0.311	1
Senp5	0.656227	-0.266086	0.128	0.148	1
Mrpl33	0.65734	-0.293713	0.821	0.639	1
Plaur	0.65735	-0.25946	0.205	0.23	1
Mrps7	0.657767	-0.265817	0.333	0.23	1
Timp1	0.657936	-0.324129	0.154	0.18	1
Afap1	0.659463	-0.411091	0.41	0.344	1
Herc2	0.660689	-0.297073	0.436	0.377	1
Slc22a15	0.661834	-0.310401	0.154	0.164	1
Dock10	0.662327	-0.3134	0.256	0.18	1
Cebpz	0.662388	-0.311952	0.513	0.443	1
Ythdf1	0.664581	-0.338457	0.231	0.164	1
Atp7a	0.664713	-0.271148	0.128	0.148	1
G0s2	0.666355	-0.861304	0.41	0.295	1
Mmp14	0.671403	-0.642056	0.821	0.689	1
Srpx2	0.67151	-0.252861	0.205	0.23	1
Ensa	0.672065	-0.398217	0.308	0.279	1
Hsd11b1	0.672095	-0.28563	0.231	0.164	1
Itpr3	0.672095	-0.297334	0.231	0.164	1
Comt	0.672296	-0.390127	0.436	0.377	1
Chkb	0.673243	-0.275796	0.128	0.148	1
Ifitm6	0.675774	0.794845	0.256	0.246	1
Rflnb	0.676735	-0.288265	0.256	0.262	1
Ebf2	0.678196	-0.251925	0.513	0.377	1
Hsp90aa1	0.678894	-0.453699	0.821	0.672	1
Mob1a	0.679743	-0.347698	0.615	0.492	1
Prnp	0.681712	-0.436087	0.692	0.525	1
Tm9sf2	0.684557	-0.336379	0.59	0.459	1
Ly6c2	0.685787	-0.57801	0.205	0.23	1
Uba1	0.686869	-0.251651	0.59	0.492	1
Kctd12	0.6885	-0.563696	0.564	0.492	1
Ranbp2	0.689852	-0.285103	0.436	0.377	1
Gabbr1	0.690508	-0.30143	0.179	0.131	1
Myl12b	0.690725	-0.321241	0.846	0.738	1
Il4ra	0.691222	-0.341271	0.359	0.311	1
Whamm	0.694252	-0.253702	0.154	0.164	1
Ptpre	0.696275	-0.27139	0.282	0.23	1
Dtnbp1	0.699005	-0.348442	0.385	0.344	1
Nr2c2	0.701396	-0.332467	0.231	0.23	1
Iglc3	0.710679	-0.406642	0.154	0.164	1
Spi1	0.711584	-0.45634	0.41	0.377	1
Pygl	0.715358	-0.387044	0.487	0.361	1
Tmem109	0.717201	-0.418466	0.333	0.295	1
Stat1	0.717365	-0.598307	0.385	0.344	1
Fap	0.71749	-0.34284	0.308	0.295	1
Cmtr1	0.717628	-0.25145	0.282	0.262	1
Csf1	0.718289	-0.507742	0.667	0.459	1
Emp1	0.718754	-0.351902	0.462	0.41	1
Seh1l	0.719806	-0.328901	0.179	0.18	1
Sparcl1	0.720886	0.290679	0.154	0.131	1
U2surp	0.722852	-0.278073	0.641	0.508	1
Tnfrsf13b	0.723293	-0.289724	0.231	0.18	1
Dkk2	0.725381	-0.262819	0.128	0.098	1
Fnip1	0.727745	-0.280682	0.333	0.246	1
Colgalt1	0.729078	-0.272571	0.462	0.426	1
Apoe	0.730888	-0.528108	0.282	0.295	1
Vps13c	0.730934	-0.308515	0.256	0.246	1
Ifnar2	0.731571	-0.252193	0.59	0.41	1
Klf2	0.731901	-0.408876	0.846	0.656	1
Ascc3	0.732807	-0.344178	0.333	0.311	1
Tgfbi	0.734461	-0.521812	0.462	0.361	1
Spp1	0.735163	-1.98288	0.103	0.115	1
Tulp4	0.737949	-0.271363	0.385	0.361	1
Rab8b	0.738477	-0.319839	0.513	0.475	1
Gsr	0.740773	-0.585457	0.436	0.41	1
Fbxl5	0.742098	-0.437401	0.385	0.344	1
Pttg1	0.744193	-0.332342	0.308	0.279	1
Fgf2	0.744484	-0.26454	0.231	0.23	1
Map1s	0.744987	-0.295657	0.103	0.115	1
Fpr1	0.744987	-0.320131	0.103	0.115	1
Tmcc1	0.749541	-0.259971	0.436	0.377	1
Ctss	0.750787	-0.297739	0.205	0.213	1
Mgp	0.750787	2.05214	0.179	0.23	1
Ttyh2	0.751611	-0.291447	0.179	0.18	1
2900097C17Rik	0.752156	-0.274947	0.641	0.541	1
Usp19	0.752534	-0.267954	0.385	0.328	1
Ncoa7	0.7556	-0.306217	0.436	0.377	1
Ntn4	0.757574	-0.400806	0.308	0.279	1
Cwc25	0.758114	-0.328434	0.308	0.262	1
Cmtm6	0.760256	-0.30167	0.333	0.279	1
Cd33	0.760742	-0.381345	0.154	0.164	1
Ep300	0.761396	-0.265738	0.41	0.361	1
Dhrs9	0.762409	-0.283848	0.154	0.115	1
1600012H06Rik	0.76538	-0.319363	0.205	0.197	1
Ralb	0.765439	-0.290364	0.282	0.262	1
Chpt1	0.767102	-0.338969	0.385	0.344	1
Rnf130	0.767574	-0.29517	0.462	0.328	1
Prrc2a	0.768668	-0.28246	0.513	0.41	1
Apbb1ip	0.768908	-0.302404	0.615	0.492	1
Taok1	0.769213	-0.271461	0.59	0.459	1
Pebp1	0.771727	-0.364321	0.718	0.574	1
Vps37b	0.773659	-0.365255	0.256	0.197	1
Cd200	0.774706	-0.358963	0.103	0.115	1
Rnf103	0.775748	-0.288052	0.179	0.18	1
Ldb1	0.777145	-0.258182	0.282	0.213	1
Ddx18	0.779275	-0.302461	0.282	0.262	1
Smap2	0.780523	-0.375238	0.538	0.393	1
Hlx	0.78091	-0.30216	0.128	0.131	1
B430306N03Rik	0.78091	-0.273746	0.128	0.131	1
Ubr2	0.781422	-0.291232	0.462	0.377	1
Vasn	0.784149	-0.33472	0.667	0.557	1
Cers6	0.788014	-0.309836	0.256	0.23	1
Aldh3b1	0.788642	-0.337393	0.205	0.197	1
Cetn2	0.789181	-0.402521	0.41	0.328	1
Uvrag	0.790447	-0.284054	0.282	0.246	1
Capza1	0.790538	-0.264907	0.513	0.426	1
Cotl1	0.793117	-0.446733	0.538	0.508	1
Stat2	0.794682	-0.263696	0.256	0.246	1
Ikzf2	0.794706	-0.260719	0.103	0.115	1
Rassf5	0.795284	-0.323823	0.256	0.23	1
Itgal	0.795284	-0.432738	0.256	0.23	1
Vsir	0.795522	-0.539943	0.41	0.328	1
Socs1	0.796439	-0.309145	0.205	0.197	1
Sat1	0.799173	-0.283661	0.692	0.574	1
Sfxn3	0.801859	-0.258572	0.256	0.246	1
Trip11	0.803313	-0.265118	0.538	0.377	1
Gmfg	0.803929	-0.407548	0.538	0.492	1
Ghr	0.804183	-0.250542	0.205	0.164	1
Ccn1	0.804312	-0.476847	0.179	0.197	1
Golga4	0.805058	-0.31161	0.385	0.344	1
Wac	0.808243	-0.293619	0.487	0.393	1
Pik3r4	0.808892	-0.342069	0.128	0.131	1
Chpf	0.809876	-0.373922	0.256	0.23	1
Coa5	0.810603	-0.277309	0.256	0.213	1
Arhgef6	0.812093	-0.288694	0.205	0.197	1
Irf8	0.815006	0.318573	0.231	0.213	1
Kdm2a	0.815691	-0.258931	0.436	0.361	1
Kras	0.819109	-0.262546	0.538	0.443	1
Ak3	0.819508	-0.310426	0.359	0.311	1
Pltp	0.820673	-0.405851	0.333	0.279	1
Eps8	0.822583	-0.46885	0.231	0.213	1
Nrip1	0.822586	-0.34176	0.359	0.279	1
Neat1	0.825244	0.453828	0.795	0.721	1
Vcam1	0.827686	-0.559127	0.128	0.131	1
Actn4	0.828428	-0.258114	0.487	0.426	1
Rufy1	0.828873	-0.264549	0.154	0.148	1
Tle3	0.833081	-0.344223	0.282	0.246	1
Kitl	0.834466	-0.387309	0.462	0.344	1
Ccdc25	0.836032	-0.307758	0.333	0.295	1
S100a13	0.837224	-0.2609	0.897	0.787	1
Eif3j1	0.837483	-0.290588	0.359	0.328	1
Strip1	0.837751	-0.38389	0.154	0.148	1
Csf2rb	0.837751	-0.399101	0.154	0.148	1
Sbno1	0.838371	-0.268765	0.59	0.443	1
Mef2c	0.838717	-0.377537	0.692	0.574	1
Psmd14	0.839261	-0.266318	0.308	0.279	1
Ahnak2	0.84137	-0.261727	0.667	0.475	1
Cops9	0.841559	-0.26427	0.718	0.557	1
Smim10l1	0.842896	-0.25401	0.462	0.377	1
Psme2	0.846106	-0.269255	0.615	0.475	1
Stx18	0.84658	-0.251268	0.128	0.131	1
Pias4	0.84665	-0.30558	0.154	0.148	1
St3gal6	0.84938	-0.288701	0.179	0.18	1
Msrb1	0.849545	-0.609607	0.538	0.459	1
Camk1	0.853147	-0.371458	0.41	0.328	1
Hif1a	0.854354	-0.259558	0.436	0.377	1
Sirpa	0.854835	-0.474044	0.59	0.41	1
Csnk1g2	0.855157	-0.312225	0.41	0.311	1
Cdc42ep3	0.857486	-0.352649	0.462	0.361	1
Ndel1	0.858708	-0.308477	0.538	0.393	1
Tmod3	0.859254	-0.314099	0.641	0.508	1
Man2a2	0.859484	-0.296494	0.205	0.197	1
Map3k3	0.862818	-0.273563	0.179	0.164	1
Tnfaip3	0.865127	-0.419317	0.154	0.131	1
Sec24c	0.868369	-0.30554	0.231	0.213	1
Afdn	0.868836	-0.290338	0.308	0.262	1
Gypc	0.871316	-0.331301	0.179	0.164	1
R3hdm4	0.872204	-0.339609	0.513	0.443	1
Nfkb1	0.874467	-0.287059	0.59	0.459	1
Arhgap29	0.874961	-0.347179	0.641	0.443	1
Ssr1	0.875876	-0.330666	0.641	0.475	1
Lyn	0.87698	-0.369721	0.538	0.393	1
Eif3d	0.877852	-0.258904	0.282	0.262	1
Gja1	0.877904	-0.25719	0.333	0.311	1
Mydgf	0.879377	-0.369818	0.564	0.443	1
Cyth4	0.882429	-0.310313	0.154	0.148	1
Tgoln1	0.882524	-0.275552	0.641	0.508	1
Lst1	0.884638	-0.757103	0.333	0.311	1
Ssbp1	0.885763	-0.335592	0.385	0.295	1
Dync1i2	0.891406	-0.282931	0.795	0.607	1
Cxcl2	0.891415	-0.625351	0.154	0.148	1
Grb2	0.891659	-0.39796	0.513	0.393	1
Ywhaq	0.895655	-0.318687	0.718	0.541	1
Tank	0.896891	-0.296978	0.179	0.164	1
Fnbp1	0.897337	-0.386403	0.231	0.197	1
Il1r2	0.904083	-0.485355	0.308	0.262	1
Dact1	0.905012	-0.273526	0.513	0.426	1
Adam10	0.905045	-0.395869	0.41	0.328	1
Chmp1b	0.905441	-0.278531	0.179	0.164	1
Hist1h2bc	0.90644	-0.317429	0.308	0.246	1
Cxcl1	0.906787	0.574617	0.103	0.115	1
Col18a1	0.909427	-0.402159	0.154	0.148	1
Zfp729b	0.909427	-0.334122	0.154	0.148	1
Nol11	0.909859	-0.320594	0.282	0.213	1
Amotl2	0.915398	-0.3195	0.564	0.443	1
Gpx3	0.91645	0.337869	0.59	0.475	1
Gdi1	0.916781	-0.3206	0.436	0.361	1
Tlr2	0.918451	-0.361972	0.154	0.148	1
F3	0.918451	-0.404747	0.154	0.148	1
Trf	0.91857	-0.693511	0.282	0.23	1
Arhgap4	0.920617	-0.281788	0.179	0.148	1
Gm26740	0.922338	-0.263827	0.231	0.213	1
Srm	0.922574	-0.259046	0.179	0.164	1
Smpd3	0.923149	-0.350214	0.769	0.689	1
Fam133b	0.924211	-0.271644	0.462	0.377	1
Ugcg	0.92595	-0.341891	0.282	0.23	1
Ctsc	0.928823	-0.344321	0.231	0.197	1
Cpne2	0.928823	-0.341849	0.231	0.197	1
Wnt11	0.929689	-0.296463	0.103	0.098	1
Maf	0.930326	-0.558056	0.744	0.525	1
Aup1	0.930525	-0.254008	0.333	0.279	1
Pik3ap1	0.931249	-0.279566	0.256	0.213	1
Nudt4	0.933173	-0.274148	0.538	0.443	1
Dgat1	0.933337	-0.357338	0.282	0.23	1
Gnai3	0.93377	-0.341715	0.59	0.443	1
Mt1	0.933919	-0.35623	0.718	0.623	1
Lgmn	0.934177	-0.276642	0.205	0.18	1
5031439G07Rik	0.934178	-0.364171	0.205	0.18	1
Rb1cc1	0.935613	-0.288977	0.692	0.508	1
Cp	0.937835	-0.431473	0.231	0.213	1
Emc2	0.939938	-0.277251	0.385	0.311	1
Tnks2	0.939938	-0.421872	0.385	0.311	1
Maml2	0.940484	-0.250125	0.103	0.098	1
Pam	0.941771	-0.268633	0.692	0.541	1
Rap2c	0.946624	-0.261099	0.308	0.262	1
Matn2	0.947029	-0.433166	0.179	0.148	1
Abl2	0.948631	-0.265831	0.154	0.131	1
Etf1	0.952268	-0.285388	0.462	0.361	1
Pigs	0.952514	-0.326415	0.231	0.197	1
Saraf	0.952827	-0.330235	0.385	0.295	1
Necap2	0.954135	-0.260057	0.256	0.213	1
Sdf4	0.955513	-0.290771	0.615	0.492	1
Galnt15	0.961536	-0.303954	0.462	0.344	1
Emd	0.962305	-0.377854	0.487	0.377	1
Plau	0.964828	-0.274283	0.333	0.262	1
Zmynd8	0.966908	-0.306953	0.41	0.311	1
Pilra	0.967061	-0.327029	0.205	0.18	1
2310011J03Rik	0.967061	-0.334512	0.205	0.18	1
Pknox1	0.967061	-0.272245	0.205	0.18	1
Utp14a	0.967061	-0.250708	0.205	0.18	1
Fbh1	0.969414	-0.278254	0.256	0.213	1
Zdhhc5	0.969414	-0.304985	0.256	0.213	1
Yipf1	0.969414	-0.269397	0.256	0.213	1
Bag5	0.970344	-0.253565	0.282	0.23	1
Tgfb1	0.970468	-0.322131	0.41	0.328	1
Rsrc2	0.972363	-0.418996	0.513	0.426	1
Msl2	0.974865	-0.293956	0.487	0.377	1
Thra	0.976629	-0.252387	0.692	0.525	1
Rinl	0.976637	-0.310959	0.154	0.131	1
Egr1	0.976749	0.38607	0.538	0.656	1
Trpc4ap	0.977029	-0.283431	0.41	0.328	1
Arhgap25	0.980021	-0.252242	0.128	0.115	1
March1	0.980021	-0.370537	0.128	0.115	1
Arhgap18	0.980021	-0.251519	0.128	0.115	1
Crim1	0.982768	-0.282355	0.179	0.164	1
Ppp1r15a	0.983591	-0.422499	0.41	0.328	1
Rnf24	0.983754	-0.301298	0.103	0.098	1
Mfge8	0.987649	-0.337915	0.538	0.393	1
Ndufs7	0.987892	-0.254732	0.59	0.426	1
Angptl1	0.987893	0.642032	0.205	0.197	1
Etnk1	0.990154	-0.314651	0.41	0.328	1
Tmem106b	0.990448	-0.283338	0.462	0.361	1
Mafb	0.992689	-0.307936	0.282	0.246	1
Psmc1	0.993044	-0.305658	0.333	0.279	1
Lgals3	0.993997	-0.481168	0.59	0.459	1
Ncam1	0.994584	-0.591157	0.103	0.098	1
Cd177	1	0.258856	0.179	0.197	1
Ppp4c	1	-0.258267	0.282	0.246	1
Runx1	1	-0.329161	0.205	0.18	1
Efemp2	1	-0.265166	0.462	0.344	1

## Sheet: Sup Table 3
Supp Table 3 Periosteum CD90 Adult vs Aged	p_val	avg_log2FC	pct.1	pct.2	p_val_adj	Genes
Gm42418	3.73315e-67	-2.15312	1	1	1.20525e-62	Gm42418	excluded
Rps20	1.50477e-56	0.788914	0.998	0.971	4.85816e-52	Rps20
Rps2	9.31589e-53	0.976038	0.984	0.909	3.00763e-48	Rps2
Tmsb10	2.10098e-52	0.950879	0.983	0.95	6.783e-48	Tmsb10
Rpl9	1.54529e-51	0.875396	0.981	0.921	4.98898e-47	Rpl9
Rps24	6.44936e-48	0.69268	0.995	1	2.08218e-43	Rps24
Ifi27l2a	2.55255e-45	1.1299	0.973	0.901	8.24091e-41	Ifi27l2a
Rplp0	5.77493e-43	0.860299	0.986	0.942	1.86444e-38	Rplp0
Selenow	2.92727e-42	0.874622	0.959	0.897	9.45069e-38	Selenow
Rps19	1.40254e-40	0.733549	0.985	0.971	4.52809e-36	Rps19
Rpl11	1.49004e-39	0.714818	0.978	0.942	4.81058e-35	Rpl11
Rpl19	5.27379e-39	0.672293	0.983	0.971	1.70264e-34	Rpl19
Rps10	3.52141e-38	0.654896	0.993	0.975	1.13689e-33	Rps10
Rps27a	3.56419e-38	0.612838	0.994	0.971	1.1507e-33	Rps27a
Rpl30	5.73109e-37	0.631508	0.995	0.971	1.85028e-32	Rpl30
Rpl15	7.45014e-37	0.776461	0.963	0.893	2.40528e-32	Rpl15
Rpl41	1.34889e-36	0.602626	1	0.996	4.35488e-32	Rpl41
Serf2	2.09052e-36	0.759158	0.978	0.905	6.74923e-32	Serf2
Rpl18a	3.94996e-36	0.732493	0.987	0.934	1.27525e-31	Rpl18a
Rps7	4.74592e-36	0.66518	0.987	0.963	1.53222e-31	Rps7
Rps13	7.99083e-36	0.654006	0.982	0.95	2.57984e-31	Rps13
Rps3a1	8.89157e-36	0.603854	0.988	0.971	2.87064e-31	Rps3a1
Rpl18	2.75231e-35	0.696154	0.978	0.921	8.88584e-31	Rpl18
Rpl29	1.35819e-34	0.861128	0.935	0.818	4.38493e-30	Rpl29
Rps5	2.75908e-34	0.695691	0.98	0.975	8.90768e-30	Rps5
Rpl13	1.33219e-33	0.61746	0.993	1	4.30097e-29	Rpl13
Rps15a	1.4327e-33	0.616614	0.989	0.988	4.62547e-29	Rps15a
Nme2	6.43634e-33	0.826746	0.94	0.814	2.07797e-28	Nme2
Rps11	3.51082e-32	0.710352	0.98	0.938	1.13347e-27	Rps11
Eif1	7.9453e-32	0.627718	0.97	0.942	2.56514e-27	Eif1
Rpsa	1.85149e-31	0.597243	0.992	0.971	5.97754e-27	Rpsa
S100a10	1.0552e-30	0.83806	0.978	0.942	3.40673e-26	S100a10
mt-Co3	1.72071e-30	-0.605246	0.988	0.992	5.55533e-26	mt-Co3
Rps4x	2.66553e-30	0.669757	0.979	0.975	8.60567e-26	Rps4x
Rpl32	6.86221e-30	0.620776	0.987	0.946	2.21546e-25	Rpl32
mt-Nd2	1.45933e-29	-0.835664	0.904	0.938	4.71146e-25	mt-Nd2
Rpl8	1.58407e-29	0.65106	0.978	0.917	5.11418e-25	Rpl8
Rpl35a	2.08177e-29	0.485302	0.995	1	6.721e-25	Rpl35a
Lgals1	3.2704e-28	0.843125	0.953	0.868	1.05585e-23	Lgals1
Rpl28	4.25502e-28	0.590728	0.985	0.93	1.37373e-23	Rpl28
Ppp1r14b	4.37244e-28	0.889074	0.893	0.785	1.41164e-23	Ppp1r14b
Sem1	1.12604e-27	0.731541	0.925	0.769	3.63543e-23	Sem1
mt-Nd3	2.85205e-27	-0.887942	0.543	0.818	9.20784e-23	mt-Nd3
Ftl1	3.52708e-27	0.651672	0.961	0.917	1.13872e-22	Ftl1
S100a11	6.52457e-27	0.676884	0.972	0.926	2.10646e-22	S100a11
Rps18	7.72841e-27	0.666753	0.962	0.897	2.49512e-22	Rps18
Lars2	1.82642e-26	-0.773152	0.81	0.913	5.89661e-22	Lars2
mt-Atp6	7.62374e-26	-0.566316	0.985	0.988	2.46132e-21	mt-Atp6
Fau	7.77545e-26	0.535972	0.99	0.967	2.5103e-21	Fau
Rpl10a	3.14717e-25	0.646362	0.961	0.876	1.01606e-20	Rpl10a
Gng5	3.34092e-25	0.718225	0.895	0.781	1.07862e-20	Gng5
Ubb	2.17648e-24	0.982499	0.85	0.69	7.02676e-20	Ubb
Ppia	3.40965e-24	0.668257	0.935	0.847	1.10081e-19	Ppia
Igfbp6	4.65519e-24	0.784662	0.983	0.971	1.50293e-19	Igfbp6
S100a13	1.82908e-23	0.636536	0.939	0.855	5.9052e-19	S100a13
Tmsb4x	2.77132e-23	0.46132	0.998	0.996	8.94721e-19	Tmsb4x
Rps3	4.21099e-23	0.560345	0.959	0.909	1.35952e-18	Rps3
Fth1	7.36609e-23	0.644385	0.991	0.988	2.37814e-18	Fth1
Ost4	8.84647e-23	0.786464	0.775	0.517	2.85608e-18	Ost4
Edf1	1.69304e-22	0.802237	0.757	0.492	5.46599e-18	Edf1
Cavin3	6.16871e-22	0.784344	0.882	0.731	1.99157e-17	Cavin3
Rps23	9.28538e-22	0.417157	0.988	0.983	2.99778e-17	Rps23
Elob	1.23013e-21	0.684547	0.88	0.682	3.97148e-17	Elob
Oaz1	1.27223e-21	0.561468	0.941	0.864	4.10741e-17	Oaz1
Col6a2	2.96306e-21	0.905842	0.872	0.698	9.56623e-17	Col6a2
mt-Nd1	8.24399e-21	-0.604842	0.9	0.959	2.66157e-16	mt-Nd1
Rpl36al	1.08913e-20	0.604377	0.913	0.764	3.51625e-16	Rpl36al
mt-Co2	1.09936e-20	-0.390792	0.995	0.988	3.54929e-16	mt-Co2
Rpl23	2.40426e-20	0.434793	0.99	0.988	7.76216e-16	Rpl23
Csrp2	2.46084e-20	0.907453	0.688	0.417	7.94482e-16	Csrp2
Daglb	3.26206e-20	1.09098	0.686	0.442	1.05316e-15	Daglb
Atp5e	6.6946e-20	0.565034	0.942	0.822	2.16135e-15	Atp5e
Rpl27a	1.0888e-19	0.405327	0.993	0.983	3.5152e-15	Rpl27a
Rpl10	1.13801e-19	0.573676	0.93	0.855	3.67408e-15	Rpl10
Sec61b	5.30344e-19	0.697501	0.84	0.665	1.71221e-14	Sec61b
Rpl26	1.02153e-18	0.444694	0.988	0.955	3.29801e-14	Rpl26
Rpl7a	1.91255e-18	0.565474	0.929	0.818	6.17468e-14	Rpl7a
Sparc	2.00445e-18	0.460982	0.996	0.971	6.47138e-14	Sparc
Chchd2	2.49671e-18	0.534224	0.913	0.843	8.06063e-14	Chchd2
AY036118	3.38294e-18	-0.89019	0.676	0.81	1.09218e-13	AY036118
Col1a1	6.3978e-18	0.407783	0.99	0.963	2.06553e-13	Col1a1
Rps21	8.76601e-18	-0.391306	0.991	0.996	2.83011e-13	Rps21
Ifitm3	1.01224e-17	0.674488	0.944	0.88	3.26801e-13	Ifitm3
Gsn	1.42818e-17	0.446283	0.998	1	4.61087e-13	Gsn
Rpl22l1	1.72222e-17	0.596938	0.918	0.802	5.56018e-13	Rpl22l1
Atp5h	2.58962e-17	0.591108	0.85	0.707	8.36057e-13	Atp5h
Col3a1	2.75122e-17	0.428097	0.989	0.959	8.88233e-13	Col3a1
Ptx3	3.88229e-17	1.14731	0.43	0.145	1.2534e-12	Ptx3
Eef1b2	4.09216e-17	0.494243	0.94	0.86	1.32115e-12	Eef1b2
Myoc	6.16192e-17	-0.953941	0.198	0.446	1.98938e-12	Myoc
Smpd3	1.03765e-16	0.831258	0.854	0.781	3.35005e-12	Smpd3
Bst2	1.23375e-16	0.825467	0.75	0.562	3.98316e-12	Bst2
Nenf	2.4482e-16	0.539794	0.869	0.731	7.90401e-12	Nenf
Rpl21	2.58652e-16	0.501316	0.963	0.921	8.35057e-12	Rpl21
Atp5j	2.63349e-16	0.66068	0.769	0.562	8.50221e-12	Atp5j
Col5a3	2.7056e-16	0.866807	0.718	0.475	8.73503e-12	Col5a3
Naca	4.69984e-16	0.498209	0.936	0.855	1.51734e-11	Naca
Rps16	4.90445e-16	0.375897	0.992	0.992	1.5834e-11	Rps16
AC149090.1	5.09172e-16	-0.664925	0.255	0.488	1.64386e-11	AC149090.1
Ndufa4	6.24099e-16	0.579798	0.806	0.661	2.0149e-11	Ndufa4
Txn1	7.51837e-16	0.835914	0.857	0.723	2.42731e-11	Txn1
Olfml2a	8.35031e-16	-0.300523	0.014	0.112	2.6959e-11	Olfml2a
Rpl27	2.2189e-15	0.377624	0.965	0.955	7.1637e-11	Rpl27
mt-Nd5	2.58463e-15	-0.6919	0.507	0.698	8.34449e-11	mt-Nd5
Dynll1	3.28461e-15	0.55741	0.898	0.793	1.06044e-10	Dynll1
Calm1	5.2913e-15	0.529629	0.92	0.847	1.7083e-10	Calm1
Rps26	5.3809e-15	0.378182	0.995	0.988	1.73722e-10	Rps26
Rpl34	5.97272e-15	0.374765	0.988	0.979	1.92829e-10	Rpl34
mt-Nd4	6.46515e-15	-0.40751	0.948	0.983	2.08728e-10	mt-Nd4
Col6a1	1.00012e-14	0.61148	0.918	0.806	3.22887e-10	Col6a1
Thbd	1.14566e-14	-0.687501	0.409	0.628	3.69878e-10	Thbd
Cox5b	1.25203e-14	0.605675	0.718	0.512	4.04219e-10	Cox5b
Rpl23a	1.40968e-14	-0.430408	0.909	0.95	4.55116e-10	Rpl23a
S100a6	1.7272e-14	0.42493	0.998	1	5.57626e-10	S100a6
Tma7	2.20278e-14	0.614175	0.733	0.521	7.11169e-10	Tma7
Fbln2	2.34397e-14	-0.772855	0.551	0.74	7.56752e-10	Fbln2
Ddr2	3.31849e-14	-0.71515	0.79	0.876	1.07138e-09	Ddr2
Ubc	4.5008e-14	0.545838	0.874	0.744	1.45308e-09	Ubc
Gapdh	6.70012e-14	0.602684	0.756	0.558	2.16313e-09	Gapdh
Rpl39	7.45103e-14	0.347103	0.995	0.967	2.40556e-09	Rpl39
Rpl22	9.76758e-14	0.358847	0.981	0.983	3.15346e-09	Rpl22
Fn1	1.08454e-13	0.626158	0.957	0.963	3.50144e-09	Fn1
Tuba1a	1.08746e-13	0.544962	0.902	0.793	3.51086e-09	Tuba1a
Atox1	1.19549e-13	0.579739	0.842	0.731	3.85965e-09	Atox1
mt-Co1	1.70725e-13	-0.319285	0.99	0.992	5.51187e-09	mt-Co1
Myl6	2.91116e-13	0.391341	0.966	0.934	9.39868e-09	Myl6
Cox7a2	3.36744e-13	0.547915	0.723	0.529	1.08718e-08	Cox7a2
Cox8a	4.10256e-13	0.468477	0.877	0.74	1.32451e-08	Cox8a
Il4ra	4.24998e-13	0.718854	0.525	0.277	1.37211e-08	Il4ra
Eif3f	5.67794e-13	0.579825	0.77	0.599	1.83312e-08	Eif3f
Ccl11	6.16379e-13	0.700194	0.814	0.686	1.98998e-08	Ccl11
Adamtsl3	1.06504e-12	-0.350859	0.036	0.149	3.43849e-08	Adamtsl3
Ubl5	1.18396e-12	0.540594	0.743	0.554	3.8224e-08	Ubl5
Cyb5a	1.23491e-12	0.530286	0.811	0.674	3.98691e-08	Cyb5a
Rpl37a	1.98969e-12	0.318123	0.999	1	6.42373e-08	Rpl37a
Hint1	2.02327e-12	0.484481	0.836	0.731	6.53213e-08	Hint1
Atp5g2	2.43545e-12	0.493563	0.794	0.653	7.86283e-08	Atp5g2
Ccl7	2.53892e-12	1.37606	0.423	0.211	8.1969e-08	Ccl7
Wnt2	3.5818e-12	0.723091	0.617	0.426	1.15638e-07	Wnt2
Snrpg	3.75858e-12	0.479589	0.868	0.731	1.21346e-07	Snrpg
Anxa1	3.94609e-12	0.448306	0.93	0.872	1.27399e-07	Anxa1
Nfix	4.06046e-12	-0.502285	0.888	0.934	1.31092e-07	Nfix
Gabarap	4.39271e-12	0.469674	0.909	0.835	1.41819e-07	Gabarap
Myl12a	4.83441e-12	0.610196	0.669	0.479	1.56079e-07	Myl12a
Smdt1	5.87262e-12	0.543193	0.752	0.591	1.89598e-07	Smdt1
Postn	8.60779e-12	0.965563	0.568	0.335	2.77903e-07	Postn
Cyb5r3	1.3008e-11	-0.551373	0.479	0.686	4.19965e-07	Cyb5r3
Ssr4	1.33763e-11	0.570497	0.645	0.459	4.31853e-07	Ssr4
Npc2	1.45095e-11	0.507049	0.903	0.835	4.6844e-07	Npc2
Atp5d	1.53249e-11	0.49841	0.693	0.483	4.94766e-07	Atp5d
Rpl36	1.61909e-11	0.352485	0.982	0.95	5.22722e-07	Rpl36
Snrpe	1.73161e-11	0.550715	0.68	0.496	5.59051e-07	Snrpe
mt-Atp8	1.81812e-11	-0.585706	0.439	0.624	5.8698e-07	mt-Atp8
0610010K14Rik	2.13953e-11	0.560911	0.336	0.124	6.90748e-07	0610010K14Rik
Hspe1	2.58287e-11	0.563855	0.695	0.496	8.33881e-07	Hspe1
Atpif1	2.63043e-11	0.561029	0.712	0.537	8.49236e-07	Atpif1
Bgn	2.77205e-11	-0.623991	0.215	0.43	8.94955e-07	Bgn
Blvrb	2.78472e-11	0.582481	0.681	0.517	8.99047e-07	Blvrb
Bcl7c	3.73406e-11	0.534022	0.606	0.397	1.20554e-06	Bcl7c
Pfn1	3.78277e-11	0.570643	0.769	0.665	1.22127e-06	Pfn1
Cox7c	3.98404e-11	0.426487	0.895	0.773	1.28625e-06	Cox7c
Pmm1	5.08516e-11	0.704153	0.391	0.194	1.64175e-06	Pmm1
Trim25	5.63463e-11	0.534486	0.331	0.12	1.81914e-06	Trim25
D8Ertd738e	6.46769e-11	0.534309	0.668	0.471	2.08809e-06	D8Ertd738e
Isg15	6.80606e-11	1.01751	0.428	0.211	2.19734e-06	Isg15
Nr1d1	7.566e-11	-0.368977	0.047	0.161	2.44268e-06	Nr1d1
Txndc17	8.32005e-11	0.492035	0.778	0.607	2.68613e-06	Txndc17
Rpl36a	8.5365e-11	0.347056	0.951	0.897	2.75601e-06	Rpl36a
Rps15	8.71011e-11	-0.336583	0.924	0.934	2.81206e-06	Rps15
Uqcc2	9.99725e-11	0.554681	0.782	0.628	3.22761e-06	Uqcc2
Plxdc2	1.01181e-10	-0.519258	0.635	0.798	3.26664e-06	Plxdc2
Tle5	1.08616e-10	0.498868	0.768	0.603	3.50666e-06	Tle5
Igfbp5	1.10138e-10	-0.49093	0.982	0.983	3.55582e-06	Igfbp5
Selenom	1.25473e-10	0.545807	0.809	0.682	4.05089e-06	Selenom
Zbtb20	1.28268e-10	-0.415016	0.904	0.942	4.14114e-06	Zbtb20
Anxa2	1.58432e-10	0.466399	0.935	0.888	5.11499e-06	Anxa2
C3	2.0478e-10	0.481799	0.921	0.921	6.61133e-06	C3
Btf3	3.03032e-10	0.401404	0.89	0.818	9.78337e-06	Btf3
Eif3k	3.14415e-10	0.487363	0.669	0.492	1.01509e-05	Eif3k
Sec61g	3.24356e-10	0.397799	0.873	0.764	1.04718e-05	Sec61g
Rpl24	3.41261e-10	0.295466	0.978	0.959	1.10176e-05	Rpl24
Coa3	3.49913e-10	0.519024	0.5	0.298	1.12969e-05	Coa3
Scand1	5.67176e-10	0.487105	0.659	0.467	1.83113e-05	Scand1
Nfia	6.48759e-10	-0.499458	0.58	0.723	2.09452e-05	Nfia
Selenok	6.62631e-10	0.50936	0.745	0.595	2.1393e-05	Selenok
Trmt112	6.96626e-10	0.555213	0.538	0.36	2.24906e-05	Trmt112
Rarres2	8.3344e-10	0.4816	0.833	0.731	2.69076e-05	Rarres2
Ppa1	9.12239e-10	0.524036	0.455	0.244	2.94516e-05	Ppa1
Cox6c	9.28725e-10	0.374854	0.888	0.756	2.99839e-05	Cox6c
Chd3	1.72393e-09	-0.484253	0.251	0.434	5.5657e-05	Chd3
Timm8b	1.84976e-09	0.530048	0.496	0.306	5.97196e-05	Timm8b
Pcbp2	1.92184e-09	-0.492602	0.61	0.748	6.20467e-05	Pcbp2
Serpinh1	1.93624e-09	0.379158	0.973	0.942	6.25114e-05	Serpinh1
Igf1r	2.13706e-09	-0.536409	0.329	0.5	6.89949e-05	Igf1r
Hsp90ab1	3.25693e-09	-0.340525	0.937	0.967	0.00010515	Hsp90ab1
Mrgprg	3.30178e-09	0.855204	0.527	0.339	0.000106598	Mrgprg
Ndufa13	3.3179e-09	0.430173	0.733	0.591	0.000107118	Ndufa13
Gpx4	3.5143e-09	0.42811	0.866	0.789	0.000113459	Gpx4
Ndufa7	3.66264e-09	0.478847	0.729	0.57	0.000118248	Ndufa7
Ifi205	3.68724e-09	0.524657	0.614	0.463	0.000119043	Ifi205
Zbp1	3.83716e-09	0.503678	0.298	0.116	0.000123883	Zbp1
Basp1	4.3901e-09	0.590577	0.702	0.525	0.000141734	Basp1
Rps8	4.56835e-09	0.251166	0.999	1	0.000147489	Rps8
Bri3	4.62352e-09	0.468258	0.698	0.541	0.00014927	Bri3
Fzd10os	4.89334e-09	0.585949	0.31	0.14	0.000157982	Fzd10os
Clta	4.95267e-09	0.38998	0.703	0.512	0.000159897	Clta
Nedd8	6.05028e-09	0.426864	0.703	0.537	0.000195333	Nedd8
Pgls	6.14787e-09	0.480025	0.632	0.45	0.000198484	Pgls
Hcfc1r1	6.44143e-09	0.484146	0.674	0.471	0.000207962	Hcfc1r1
Hypk	6.74597e-09	0.475247	0.506	0.335	0.000217794	Hypk
0610012G03Rik	7.72527e-09	0.516771	0.429	0.252	0.00024941	0610012G03Rik
Rpl14	8.18218e-09	0.291309	0.958	0.897	0.000264162	Rpl14
Chst1	8.42083e-09	-0.490664	0.28	0.455	0.000271866	Chst1
Sdc2	8.66982e-09	-0.504839	0.382	0.55	0.000279905	Sdc2
Uqcrb	9.21511e-09	0.466854	0.697	0.545	0.00029751	Uqcrb
Myl12b	9.26127e-09	0.462239	0.673	0.5	0.000299	Myl12b
Mrpl33	9.28134e-09	0.443305	0.797	0.694	0.000299648	Mrpl33
Pomp	9.77663e-09	0.50368	0.627	0.471	0.000315638	Pomp
S1pr3	9.85194e-09	0.491815	0.188	0.041	0.00031807	S1pr3
Rpl3	1.05744e-08	0.302036	0.96	0.955	0.000341395	Rpl3
1810037I17Rik	1.05757e-08	0.474792	0.65	0.475	0.000341437	1810037I17Rik
Rpl37	1.09226e-08	0.269942	0.993	0.975	0.000352636	Rpl37
Mrps21	1.17609e-08	0.499893	0.646	0.508	0.0003797	Mrps21
S100a8	1.25442e-08	-0.44991	0.234	0.405	0.000404989	S100a8
Pfdn5	1.27164e-08	0.348196	0.889	0.822	0.000410548	Pfdn5
Il18	1.29454e-08	0.545236	0.467	0.285	0.000417943	Il18
Hsd11b1	1.33034e-08	0.546565	0.281	0.107	0.0004295	Hsd11b1
Vkorc1	1.39645e-08	0.44689	0.708	0.583	0.000450844	Vkorc1
Rtp4	1.43528e-08	0.428875	0.247	0.079	0.000463381	Rtp4
Rps27l	1.80442e-08	0.425301	0.829	0.723	0.000582557	Rps27l
Mfap5	1.87222e-08	0.481376	0.908	0.843	0.000604446	Mfap5
H2-T23	1.97789e-08	0.524013	0.414	0.223	0.00063856	H2-T23
Ybx3	2.02209e-08	0.397917	0.831	0.736	0.00065283	Ybx3
Micos10	2.03415e-08	0.456972	0.656	0.496	0.000656726	Micos10
Timm10b	2.12634e-08	0.466223	0.526	0.351	0.000686489	Timm10b
Ccnd1	2.1321e-08	-0.607316	0.236	0.384	0.00068835	Ccnd1
Mmp2	2.34193e-08	0.396709	0.896	0.81	0.000756092	Mmp2
Eef1d	2.39293e-08	0.375577	0.752	0.612	0.000772558	Eef1d
Emilin2	2.46015e-08	0.427883	0.821	0.707	0.000794259	Emilin2
Celf2	2.48789e-08	-0.445212	0.554	0.727	0.000803215	Celf2
Dact1	2.53257e-08	-0.707593	0.468	0.603	0.000817641	Dact1
Slc25a4	2.5367e-08	0.425358	0.782	0.636	0.000818974	Slc25a4
Id3	2.54205e-08	0.745129	0.702	0.587	0.000820702	Id3
Wipf1	2.95663e-08	-0.472922	0.34	0.517	0.000954548	Wipf1
Scara5	3.18683e-08	-0.441069	0.874	0.913	0.00102887	Scara5
Psmb1	3.63073e-08	0.470071	0.613	0.455	0.00117218	Psmb1
Cygb	3.63989e-08	-0.643927	0.288	0.459	0.00117514	Cygb
Ndufb9	3.69268e-08	0.40505	0.731	0.595	0.00119218	Ndufb9
Cd248	3.93336e-08	0.411602	0.865	0.789	0.00126988	Cd248
Hook3	4.13727e-08	-0.378728	0.552	0.707	0.00133572	Hook3
Actg1	4.23689e-08	0.434558	0.962	0.938	0.00136788	Actg1
Pnp	4.53876e-08	0.514957	0.527	0.36	0.00146534	Pnp
Eif3a	4.65849e-08	-0.465063	0.547	0.669	0.00150399	Eif3a
Abca1	4.93165e-08	-0.404008	0.437	0.612	0.00159218	Abca1
Nfkbia	5.49731e-08	0.71922	0.596	0.446	0.00177481	Nfkbia
Sri	5.76609e-08	0.402643	0.592	0.413	0.00186158	Sri
Serpinb6a	6.14851e-08	0.345965	0.928	0.876	0.00198505	Serpinb6a
Mrpl54	6.69146e-08	0.422975	0.484	0.314	0.00216034	Mrpl54
Dad1	6.91881e-08	0.434491	0.657	0.512	0.00223374	Dad1
Lsm6	7.59139e-08	0.475034	0.456	0.293	0.00245088	Lsm6
Ndufa5	8.03346e-08	0.475469	0.587	0.43	0.0025936	Ndufa5
Emp3	8.15568e-08	0.396749	0.817	0.698	0.00263306	Emp3
Plac8	8.30135e-08	0.797675	0.573	0.417	0.00268009	Plac8
Ndufb10	8.49848e-08	0.437163	0.665	0.537	0.00274373	Ndufb10
Rbms3	8.72774e-08	-0.464026	0.401	0.554	0.00281775	Rbms3
Mrpl30	8.7552e-08	0.435034	0.538	0.372	0.00282662	Mrpl30
Ndufc1	9.2669e-08	0.413466	0.646	0.496	0.00299182	Ndufc1
Mrps24	9.64606e-08	0.489785	0.512	0.355	0.00311423	Mrps24
Zmat5	9.69034e-08	0.419704	0.249	0.099	0.00312853	Zmat5
Rhoc	1.01557e-07	0.420549	0.733	0.62	0.00327876	Rhoc
Atp5j2	1.03815e-07	0.398327	0.815	0.707	0.00335166	Atp5j2
Ndufa2	1.11132e-07	0.368924	0.823	0.736	0.00358789	Ndufa2
Atp5g1	1.11433e-07	0.462045	0.622	0.459	0.00359762	Atp5g1
Crip2	1.1612e-07	-0.347455	0.294	0.467	0.00374894	Crip2
Uqcrh	1.17319e-07	0.30398	0.902	0.884	0.00378763	Uqcrh
Park7	1.18638e-07	0.444823	0.606	0.467	0.00383023	Park7
Ccnd2	1.19796e-07	-0.458308	0.215	0.364	0.00386763	Ccnd2
Ly6a	1.39727e-07	0.271384	0.978	0.938	0.00451108	Ly6a
Eif5a	1.64864e-07	0.447802	0.671	0.533	0.00532263	Eif5a
Clip1	1.66708e-07	-0.494849	0.35	0.5	0.00538216	Clip1
Rock2	1.69229e-07	-0.408958	0.769	0.818	0.00546356	Rock2
Snrpd2	1.71757e-07	0.466976	0.608	0.479	0.00554516	Snrpd2
Irf7	1.75788e-07	0.51191	0.25	0.103	0.00567532	Irf7
Pxdn	1.82116e-07	0.440484	0.431	0.252	0.00587962	Pxdn
Grcc10	1.90935e-07	0.452903	0.646	0.5	0.00616433	Grcc10
Atp6v1f	1.99285e-07	0.406947	0.635	0.475	0.00643392	Atp6v1f
Abca8b	2.20274e-07	-0.368171	0.069	0.169	0.00711156	Abca8b
Aebp1	2.26896e-07	-0.51199	0.728	0.793	0.00732535	Aebp1
Cavin2	2.43422e-07	-0.37569	0.186	0.331	0.00785888	Cavin2
Ndufb11	2.50804e-07	0.373723	0.752	0.579	0.0080972	Ndufb11
Atp5l	2.70895e-07	0.313102	0.895	0.86	0.00874585	Atp5l
Rtn1	2.75463e-07	-0.341989	0.054	0.145	0.00889332	Rtn1
Negr1	3.11006e-07	-0.384547	0.136	0.264	0.0100408	Negr1
Nipbl	3.21914e-07	-0.457652	0.354	0.508	0.010393	Nipbl
Col6a5	3.28139e-07	0.556653	0.406	0.223	0.010594	Col6a5
Ndufs7	3.49214e-07	0.430242	0.468	0.31	0.0112744	Ndufs7
Itgbl1	3.55518e-07	-0.286384	0.081	0.19	0.0114779	Itgbl1
Gm2000	3.66956e-07	0.411686	0.392	0.227	0.0118472	Gm2000
Prdx2	4.44232e-07	0.398371	0.658	0.504	0.014342	Prdx2
Svil	4.47038e-07	0.415512	0.632	0.508	0.0144326	Svil
Cenpx	4.53341e-07	0.407402	0.466	0.293	0.0146361	Cenpx
Mcee	4.87658e-07	0.365706	0.277	0.12	0.015744	Mcee
Rpl7	4.88828e-07	0.25325	0.978	0.971	0.0157818	Rpl7
2310039H08Rik	4.96401e-07	0.436488	0.285	0.14	0.0160263	2310039H08Rik
Copz2	4.98651e-07	0.42497	0.472	0.306	0.016099	Copz2
Ralbp1	5.09351e-07	-0.375634	0.581	0.694	0.0164444	Ralbp1
Nupr1	5.37702e-07	0.440863	0.697	0.541	0.0173597	Nupr1
Gm26917	5.7894e-07	-0.453593	0.314	0.467	0.0186911	Gm26917
Vezf1	5.79352e-07	-0.366007	0.28	0.438	0.0187044	Vezf1
Col5a1	5.86395e-07	0.417468	0.821	0.702	0.0189318	Col5a1
Uqcr10	6.04782e-07	0.389228	0.717	0.612	0.0195254	Uqcr10
Sar1a	6.06006e-07	0.439894	0.617	0.475	0.0195649	Sar1a
Foxp1	6.68293e-07	-0.424918	0.425	0.57	0.0215758	Foxp1
Prdx5	6.87811e-07	0.353599	0.698	0.521	0.022206	Prdx5
Rbpj	6.90901e-07	-0.32055	0.641	0.764	0.0223058	Rbpj
Mrps16	6.93325e-07	0.385118	0.458	0.293	0.022384	Mrps16
Ppib	7.39835e-07	0.442943	0.769	0.711	0.0238856	Ppib
Zfhx4	8.13202e-07	-0.430421	0.573	0.694	0.0262542	Zfhx4
Mmp14	8.3413e-07	-0.504246	0.752	0.814	0.0269299	Mmp14
Phf11d	8.85084e-07	0.410316	0.228	0.091	0.0285749	Phf11d
Taf10	9.01886e-07	0.418706	0.483	0.343	0.0291174	Taf10
Ablim1	9.12084e-07	-0.468092	0.651	0.736	0.0294466	Ablim1
Higd1a	9.71916e-07	0.408085	0.35	0.194	0.0313783	Higd1a
Mrpl20	9.72931e-07	0.425202	0.435	0.285	0.0314111	Mrpl20
Ahnak2	9.83026e-07	-0.454154	0.513	0.628	0.031737	Ahnak2
Ppp4r3a	1.02519e-06	-0.302247	0.125	0.244	0.0330982	Ppp4r3a
Ctsh	1.03254e-06	0.500355	0.311	0.165	0.0333354	Ctsh
Taok1	1.09328e-06	-0.391742	0.423	0.57	0.0352965	Taok1
Churc1	1.12746e-06	0.445117	0.367	0.223	0.0364	Churc1
Lsm4	1.19756e-06	0.420638	0.364	0.211	0.0386632	Lsm4
Sema3c	1.24449e-06	-0.467615	0.865	0.847	0.0401783	Sema3c
Serpinf1	1.3281e-06	0.315388	0.87	0.752	0.0428778	Serpinf1
Galnt15	1.34758e-06	-0.474765	0.261	0.401	0.0435067	Galnt15
Emp2	1.41273e-06	-0.274357	0.09	0.194	0.0456099	Emp2
Ankrd12	1.41648e-06	-0.476216	0.273	0.417	0.0457311	Ankrd12
Ptp4a2	1.44539e-06	-0.365579	0.807	0.864	0.0466645	Ptp4a2
Serpina3g	1.45626e-06	0.348205	0.133	0.025	0.0470154	Serpina3g
Tomm6	1.45694e-06	0.417041	0.669	0.545	0.0470374	Tomm6
Jpt1	1.45787e-06	0.353317	0.669	0.541	0.0470675	Jpt1
Bmpr2	1.47412e-06	-0.476037	0.374	0.512	0.047592	Bmpr2
Tmem30a	1.48537e-06	-0.438868	0.375	0.525	0.0479553	Tmem30a
Uqcr11	1.51572e-06	0.391	0.757	0.682	0.0489349	Uqcr11
Lamtor2	1.55493e-06	0.411069	0.606	0.479	0.050201	Lamtor2
1810058I24Rik	1.73894e-06	0.388981	0.542	0.388	0.0561417	1810058I24Rik
Cdc42ep2	1.7774e-06	0.463961	0.449	0.293	0.0573833	Cdc42ep2
Medag	2.12243e-06	-0.340549	0.71	0.814	0.0685225	Medag
Rras	2.19951e-06	0.42168	0.568	0.417	0.071011	Rras
Lpar1	2.41219e-06	-0.337546	0.371	0.512	0.0778777	Lpar1
Dact2	2.47713e-06	-0.568611	0.238	0.36	0.0799743	Dact2
Gap43	2.48278e-06	0.455787	0.236	0.099	0.0801565	Gap43
Timm13	2.5305e-06	0.396309	0.635	0.512	0.0816972	Timm13
Smarca2	2.58767e-06	-0.354622	0.419	0.55	0.083543	Smarca2
Ndufa1	2.58976e-06	0.40594	0.549	0.397	0.0836104	Ndufa1
Prelid1	2.61455e-06	0.394403	0.521	0.376	0.0844109	Prelid1
Polr2f	2.66301e-06	0.388955	0.509	0.355	0.0859752	Polr2f
Rwdd1	2.66394e-06	0.418797	0.573	0.434	0.0860053	Rwdd1
Csde1	2.66995e-06	-0.305149	0.575	0.69	0.0861994	Csde1
Ciao2b	2.69106e-06	0.36488	0.291	0.145	0.0868807	Ciao2b
Mrfap1	2.76459e-06	0.34871	0.687	0.579	0.0892547	Mrfap1
Pum2	2.78973e-06	-0.408266	0.279	0.417	0.0900666	Pum2
Sh3bgrl3	2.83762e-06	0.407627	0.637	0.483	0.0916125	Sh3bgrl3
Cox5a	2.92726e-06	0.402924	0.51	0.376	0.0945065	Cox5a
Ier2	3.05677e-06	0.851717	0.553	0.442	0.0986877	Ier2
Eif5b	3.09761e-06	-0.31097	0.367	0.525	0.100006	Eif5b
Smurf2	3.21586e-06	-0.333992	0.287	0.434	0.103824	Smurf2
Tmem158	3.34747e-06	0.481014	0.543	0.409	0.108073	Tmem158
Atp5g3	3.38777e-06	0.348917	0.625	0.483	0.109374	Atp5g3
Ndufb4	3.39682e-06	0.375437	0.618	0.483	0.109666	Ndufb4
Golim4	3.41303e-06	-0.346133	0.486	0.616	0.11019	Golim4
Zfp704	3.54164e-06	-0.332718	0.162	0.285	0.114342	Zfp704
Ecm1	3.55457e-06	0.340234	0.861	0.822	0.114759	Ecm1
Bbx	3.55595e-06	-0.30827	0.122	0.231	0.114804	Bbx
Hsbp1	3.71869e-06	0.399644	0.64	0.537	0.120058	Hsbp1
Mettl7a1	3.83969e-06	-0.336281	0.089	0.186	0.123964	Mettl7a1
Ndufab1	3.90601e-06	0.393552	0.461	0.31	0.126106	Ndufab1
Spop	3.94439e-06	-0.376425	0.375	0.512	0.127345	Spop
Psme1	4.33866e-06	0.328748	0.603	0.438	0.140074	Psme1
Sf3b6	4.43384e-06	0.367389	0.473	0.322	0.143146	Sf3b6
Mrps18c	4.74944e-06	0.38039	0.262	0.132	0.153336	Mrps18c
Krtcap2	4.8659e-06	0.307308	0.752	0.678	0.157096	Krtcap2
Pura	5.00944e-06	-0.342615	0.419	0.558	0.16173	Pura
Atf3	5.10278e-06	0.802379	0.301	0.161	0.164743	Atf3
Mrpl18	5.14141e-06	0.348569	0.308	0.178	0.165991	Mrpl18
Ifi35	5.29096e-06	0.393602	0.293	0.157	0.170819	Ifi35
Mrpl52	5.36429e-06	0.383909	0.787	0.694	0.173186	Mrpl52
Fis1	5.77778e-06	0.393799	0.571	0.438	0.186536	Fis1
Ndufv3	5.80325e-06	0.376628	0.637	0.5	0.187358	Ndufv3
Ndufb7	5.86032e-06	0.377445	0.581	0.434	0.1892	Ndufb7
AW551984	6.00524e-06	0.390372	0.468	0.331	0.193879	AW551984
Rpl13a	6.26904e-06	-0.261753	0.955	0.955	0.202396	Rpl13a
Ppp3ca	6.33012e-06	-0.366822	0.308	0.446	0.204368	Ppp3ca
Ndufa8	6.40661e-06	0.41414	0.472	0.343	0.206837	Ndufa8
St3gal1	6.50752e-06	0.456249	0.391	0.244	0.210095	St3gal1
Klc1	6.57215e-06	-0.298391	0.216	0.351	0.212182	Klc1
Zbtb7a	6.61588e-06	-0.443662	0.35	0.483	0.213594	Zbtb7a
S100a16	6.77159e-06	0.343608	0.845	0.822	0.218621	S100a16
Esd	6.79196e-06	0.432853	0.58	0.467	0.219279	Esd
Prnp	6.94809e-06	-0.330133	0.592	0.702	0.224319	Prnp
Fmc1	6.98107e-06	0.452462	0.339	0.219	0.225384	Fmc1
Iah1	6.9847e-06	0.399944	0.35	0.215	0.225501	Iah1
Lgals3	7.10485e-06	0.59746	0.543	0.401	0.22938	Lgals3
Tubb2a	7.17648e-06	0.366798	0.401	0.264	0.231693	Tubb2a
Sumo2	7.74407e-06	0.395207	0.718	0.645	0.250017	Sumo2
Tmed3	7.8646e-06	0.355285	0.669	0.545	0.253909	Tmed3
Polr2j	8.26391e-06	0.353904	0.339	0.202	0.2668	Polr2j
Ran	8.81835e-06	0.455094	0.544	0.43	0.2847	Ran
Capzb	8.89037e-06	0.370629	0.595	0.463	0.287026	Capzb
Card19	9.44009e-06	0.336149	0.287	0.149	0.304773	Card19
Cdc73	9.44296e-06	-0.300542	0.119	0.223	0.304866	Cdc73
Ndufb8	9.88015e-06	0.363107	0.533	0.409	0.318981	Ndufb8
Pttg1	1.00995e-05	0.347727	0.305	0.165	0.326064	Pttg1
Fkbp1a	1.0284e-05	0.342527	0.778	0.661	0.33202	Fkbp1a
Ndufb3	1.0315e-05	0.351382	0.456	0.318	0.333019	Ndufb3
Etv1	1.06015e-05	-0.264331	0.055	0.132	0.34227	Etv1
Ccdc28b	1.0611e-05	0.338973	0.202	0.087	0.342577	Ccdc28b
Asap1	1.06806e-05	0.446162	0.445	0.31	0.344824	Asap1
Micos13	1.07188e-05	0.33624	0.479	0.339	0.346057	Micos13
Arhgef12	1.08559e-05	-0.323603	0.449	0.574	0.350484	Arhgef12
Psme2	1.11108e-05	0.369614	0.471	0.339	0.358713	Psme2
S100a4	1.12727e-05	-0.501519	0.428	0.55	0.363938	S100a4
Ifi204	1.14369e-05	0.424913	0.64	0.533	0.36924	Ifi204
Tcf4	1.15837e-05	-0.417015	0.529	0.645	0.373979	Tcf4
Nfe2l1	1.18794e-05	-0.33172	0.379	0.529	0.383527	Nfe2l1
H2afj	1.19373e-05	0.331744	0.444	0.298	0.385394	H2afj
Kmt2c	1.20061e-05	-0.307048	0.232	0.372	0.387617	Kmt2c
Man1a	1.20803e-05	-0.307342	0.761	0.86	0.390013	Man1a
Cdc14b	1.20862e-05	-0.254949	0.109	0.211	0.390203	Cdc14b
Fgl2	1.2444e-05	0.583191	0.36	0.215	0.401755	Fgl2
Tomm7	1.29746e-05	0.328279	0.797	0.723	0.418884	Tomm7
Cd81	1.3028e-05	0.305364	0.854	0.76	0.42061	Cd81
Serpina3c	1.31838e-05	0.342226	0.198	0.079	0.425638	Serpina3c
Ranbp1	1.32064e-05	0.402896	0.453	0.326	0.42637	Ranbp1
Ildr2	1.33944e-05	-0.396519	0.415	0.529	0.432439	Ildr2
Ndufs5	1.42319e-05	0.3686	0.597	0.475	0.459478	Ndufs5
Smim11	1.43162e-05	0.350355	0.58	0.471	0.462199	Smim11
Map1lc3a	1.44182e-05	0.260846	0.59	0.426	0.465491	Map1lc3a
Vgll3	1.44436e-05	-0.459968	0.364	0.483	0.466311	Vgll3
Mbnl1	1.46513e-05	-0.349216	0.628	0.731	0.473017	Mbnl1
Rbx1	1.48653e-05	0.333756	0.667	0.57	0.479927	Rbx1
Dbi	1.4996e-05	0.384998	0.698	0.583	0.484146	Dbi
Fstl1	1.51303e-05	0.263709	0.981	0.979	0.488481	Fstl1
Luc7l3	1.57164e-05	-0.335412	0.233	0.364	0.507404	Luc7l3
Pdzd2	1.60512e-05	-0.296519	0.162	0.277	0.518212	Pdzd2
Cuta	1.63224e-05	0.375813	0.451	0.31	0.526968	Cuta
Ccl2	1.66363e-05	0.770794	0.19	0.083	0.537102	Ccl2
Polr1d	1.6651e-05	0.314339	0.624	0.492	0.537578	Polr1d
Duox2	1.69232e-05	0.283903	0.131	0.033	0.546366	Duox2
Cst3	1.69844e-05	0.344627	0.81	0.719	0.548341	Cst3
Aif1l	1.73627e-05	0.419529	0.624	0.517	0.560556	Aif1l
Fhl1	1.78014e-05	0.424148	0.626	0.521	0.574719	Fhl1
Reep5	1.95407e-05	0.364856	0.638	0.508	0.63087	Reep5
Irgm1	2.00528e-05	0.354134	0.161	0.058	0.647404	Irgm1
Cald1	2.03657e-05	-0.289895	0.754	0.822	0.657507	Cald1
Psmb5	2.03861e-05	0.389158	0.435	0.318	0.658167	Psmb5
Shisa5	2.06343e-05	0.366409	0.602	0.471	0.666177	Shisa5
Cdc42	2.13323e-05	0.3323	0.824	0.736	0.688714	Cdc42
Dtnbp1	2.20893e-05	0.368175	0.536	0.409	0.713154	Dtnbp1
Pdia6	2.21349e-05	0.358859	0.708	0.624	0.714626	Pdia6
Afap1	2.26075e-05	-0.340819	0.313	0.442	0.729885	Afap1
Prpf4b	2.37173e-05	-0.312211	0.286	0.421	0.765713	Prpf4b
Arl3	2.38143e-05	0.373906	0.406	0.285	0.768844	Arl3
Tbrg1	2.46383e-05	0.39388	0.591	0.488	0.795447	Tbrg1
Yy1	2.48468e-05	-0.327933	0.28	0.409	0.80218	Yy1
Nop10	2.48536e-05	0.363307	0.568	0.442	0.8024	Nop10
Cetn3	2.49896e-05	0.315239	0.492	0.335	0.806789	Cetn3
Bicc1	2.5298e-05	-0.342481	0.614	0.711	0.816744	Bicc1
Mrpl27	2.6808e-05	0.319941	0.287	0.165	0.865498	Mrpl27
Cox6b1	2.71719e-05	0.312772	0.8	0.719	0.877246	Cox6b1
Amotl2	2.83609e-05	-0.343767	0.388	0.5	0.915632	Amotl2
Abhd17a	2.86101e-05	0.373692	0.318	0.198	0.923679	Abhd17a
Rtf1	2.92161e-05	-0.294863	0.27	0.401	0.943241	Rtf1
Tbcb	2.93191e-05	0.361526	0.426	0.306	0.946568	Tbcb
Crip1	2.98584e-05	0.297988	0.973	0.979	0.963979	Crip1
Ndufs4	3.09483e-05	0.337092	0.419	0.293	0.999165	Ndufs4
Eif3h	3.1288e-05	0.263676	0.603	0.446	1	Eif3h
Ube2s	3.14437e-05	0.372965	0.442	0.306	1	Ube2s
Ndufs3	3.16043e-05	0.310777	0.337	0.211	1	Ndufs3
Psmb6	3.20869e-05	0.393998	0.461	0.339	1	Psmb6
Mrps14	3.23541e-05	0.36561	0.453	0.339	1	Mrps14
Pdcd5	3.29658e-05	0.286968	0.59	0.475	1	Pdcd5
Svbp	3.34322e-05	0.361032	0.47	0.355	1	Svbp
Naxe	3.35775e-05	0.313206	0.289	0.165	1	Naxe
H2afv	3.42416e-05	0.2875	0.573	0.43	1	H2afv
Tubb6	3.47859e-05	0.385927	0.488	0.364	1	Tubb6
Psmb4	3.51267e-05	0.347347	0.585	0.488	1	Psmb4
Sra1	3.74344e-05	0.301142	0.404	0.277	1	Sra1
Maged2	3.80078e-05	0.33563	0.317	0.194	1	Maged2
Nek7	3.93833e-05	-0.300133	0.199	0.318	1	Nek7
Gda	4.00206e-05	-0.329475	0.475	0.587	1	Gda
Cxcl1	4.11983e-05	0.613597	0.249	0.128	1	Cxcl1
Ostc	4.38267e-05	0.357143	0.6	0.475	1	Ostc
Mvb12a	4.43899e-05	0.360768	0.249	0.136	1	Mvb12a
Stoml2	4.44212e-05	0.270605	0.191	0.083	1	Stoml2
Tnfaip6	4.45209e-05	0.359505	0.395	0.26	1	Tnfaip6
Crybg3	4.50116e-05	-0.294948	0.109	0.202	1	Crybg3
Malat1	4.54458e-05	-0.403692	0.88	0.926	1	Malat1
Chmp2a	4.54526e-05	0.375021	0.526	0.413	1	Chmp2a
Snhg18	4.55636e-05	0.357592	0.564	0.446	1	Snhg18
Mrps28	4.58433e-05	0.264474	0.277	0.149	1	Mrps28
Mylip	4.77102e-05	-0.390584	0.294	0.409	1	Mylip
Tomm5	4.85032e-05	0.346578	0.55	0.426	1	Tomm5
Psma3	4.92474e-05	0.362154	0.533	0.43	1	Psma3
Tbca	5.02763e-05	0.303045	0.671	0.558	1	Tbca
Cavin1	5.08405e-05	-0.314137	0.928	0.955	1	Cavin1
Stag1	5.11251e-05	-0.281308	0.292	0.417	1	Stag1
Psmb3	5.21508e-05	0.361262	0.5	0.372	1	Psmb3
Ramp2	5.28322e-05	0.385198	0.593	0.492	1	Ramp2
Arf5	5.36346e-05	0.296526	0.803	0.752	1	Arf5
H3f3b	5.37034e-05	0.304847	0.878	0.822	1	H3f3b
Atp5b	5.41997e-05	0.331986	0.625	0.512	1	Atp5b
Dpt	5.45459e-05	-0.324721	0.942	0.934	1	Dpt
Cdon	5.53896e-05	-0.416835	0.341	0.459	1	Cdon
1110008P14Rik	5.69074e-05	0.32374	0.244	0.132	1	1110008P14Rik
Sh3bp5	5.78162e-05	-0.385359	0.309	0.421	1	Sh3bp5
Atrx	5.8479e-05	-0.337971	0.449	0.566	1	Atrx
Pam	5.84977e-05	-0.288786	0.549	0.661	1	Pam
Apbb1ip	5.8661e-05	-0.303335	0.183	0.289	1	Apbb1ip
Nbdy	6.05696e-05	0.323894	0.283	0.169	1	Nbdy
Rnh1	6.16297e-05	0.372034	0.501	0.384	1	Rnh1
Akap12	6.33704e-05	-0.359476	0.593	0.661	1	Akap12
Sema3b	6.37099e-05	0.328995	0.266	0.149	1	Sema3b
Anxa3	6.58497e-05	0.304481	0.821	0.736	1	Anxa3
Cope	6.69725e-05	0.352287	0.436	0.31	1	Cope
Nsg1	6.83573e-05	-0.332695	0.238	0.36	1	Nsg1
Ddx24	7.05914e-05	0.344084	0.421	0.285	1	Ddx24
Hivep1	7.2809e-05	-0.284763	0.109	0.198	1	Hivep1
Dhx15	7.31235e-05	-0.288861	0.218	0.339	1	Dhx15
Bmp1	7.41924e-05	0.363047	0.695	0.591	1	Bmp1
Ndufc2	7.65669e-05	0.34366	0.498	0.38	1	Ndufc2
Rnf7	7.75728e-05	0.333034	0.486	0.368	1	Rnf7
mt-Nd4l	8.02092e-05	-0.338293	0.618	0.665	1	mt-Nd4l
Ide	8.06451e-05	-0.261665	0.182	0.298	1	Ide
Aprt	8.10322e-05	0.332283	0.522	0.388	1	Aprt
Arhgef28	8.18406e-05	0.340417	0.264	0.149	1	Arhgef28
App	8.22624e-05	-0.279022	0.686	0.764	1	App
Elof1	8.64033e-05	0.281553	0.394	0.264	1	Elof1
Cnpy2	8.90964e-05	0.313717	0.502	0.397	1	Cnpy2
Bax	9.01101e-05	0.348569	0.392	0.269	1	Bax
Tomm22	9.44776e-05	0.268713	0.42	0.298	1	Tomm22
Osr1	9.58123e-05	0.426748	0.656	0.562	1	Osr1
Cyp1b1	9.62957e-05	-0.344275	0.137	0.231	1	Cyp1b1
Qpct	9.81984e-05	-0.379618	0.385	0.5	1	Qpct
Rnase4	9.93273e-05	-0.270226	0.911	0.917	1	Rnase4
Far1	9.93607e-05	-0.279455	0.213	0.326	1	Far1
Uqcrq	9.95354e-05	0.351995	0.684	0.599	1	Uqcrq
Prdx1	9.98103e-05	0.308873	0.778	0.719	1	Prdx1
Ndrg1	0.000101852	-0.328086	0.312	0.426	1	Ndrg1
Hmgb1	0.000103459	-0.298074	0.74	0.76	1	Hmgb1
Ube2m	0.000103889	0.321139	0.355	0.244	1	Ube2m
Tmpo	0.000106169	-0.324533	0.189	0.298	1	Tmpo
Kif1b	0.000110201	-0.324229	0.326	0.438	1	Kif1b
Matn2	0.00011073	0.366635	0.307	0.19	1	Matn2
Vit	0.000110859	-0.266059	0.191	0.306	1	Vit
Sec11a	0.000110918	0.285209	0.375	0.248	1	Sec11a
Nfic	0.000112989	-0.298291	0.461	0.574	1	Nfic
Fibp	0.000113814	0.268048	0.187	0.087	1	Fibp
Pltp	0.000113907	-0.280246	0.199	0.306	1	Pltp
Lamp1	0.000114262	0.261002	0.858	0.814	1	Lamp1
Kmt2a	0.000115597	-0.311925	0.306	0.417	1	Kmt2a
Lsm7	0.00011699	0.277188	0.432	0.298	1	Lsm7
Pard3b	0.000119774	-0.31378	0.152	0.248	1	Pard3b
Peak1	0.000123101	-0.273521	0.207	0.314	1	Peak1
Psmb8	0.000124205	0.345912	0.409	0.289	1	Psmb8
Sp110	0.000125539	0.327811	0.231	0.124	1	Sp110
Atl3	0.000125718	-0.253179	0.338	0.463	1	Atl3
Nav1	0.000129983	-0.259788	0.531	0.657	1	Nav1
Tnks2	0.000132376	-0.297167	0.281	0.409	1	Tnks2
Rnf213	0.00013415	0.401119	0.338	0.223	1	Rnf213
Mettl23	0.000134797	0.324303	0.243	0.136	1	Mettl23
Pcmtd1	0.000135157	-0.269782	0.244	0.36	1	Pcmtd1
Mrpl17	0.000136218	0.311087	0.323	0.211	1	Mrpl17
Bola1	0.000136854	0.343775	0.252	0.145	1	Bola1
Aspn	0.000137698	-0.384875	0.462	0.57	1	Aspn
Tnfsf12	0.000138296	0.345741	0.398	0.277	1	Tnfsf12
Tnrc18	0.000140286	-0.338945	0.233	0.335	1	Tnrc18
Slirp	0.000140996	0.308821	0.333	0.215	1	Slirp
Kif5b	0.000145448	-0.254552	0.473	0.583	1	Kif5b
Jtb	0.000146852	0.295508	0.346	0.227	1	Jtb
Nfat5	0.000149249	-0.291383	0.247	0.36	1	Nfat5
Robo1	0.000149987	-0.269792	0.099	0.182	1	Robo1
Gngt2	0.000150616	0.338991	0.645	0.533	1	Gngt2
Cox7b	0.000152207	0.316567	0.65	0.554	1	Cox7b
Rbm25	0.000153731	-0.259484	0.273	0.397	1	Rbm25
Srsf9	0.000153869	0.283009	0.331	0.219	1	Srsf9
Rheb	0.000154626	0.294886	0.4	0.281	1	Rheb
Mrpl36	0.000155368	0.291	0.285	0.169	1	Mrpl36
Bod1l	0.000156955	-0.299979	0.273	0.384	1	Bod1l
Dag1	0.000157456	-0.275515	0.481	0.579	1	Dag1
Ncor1	0.00015979	-0.329724	0.449	0.566	1	Ncor1
Tardbp	0.00016025	-0.302829	0.247	0.36	1	Tardbp
Gtf2h5	0.000161656	0.316623	0.588	0.467	1	Gtf2h5
Col6a6	0.000162649	0.310306	0.369	0.231	1	Col6a6
Fnip1	0.000169097	-0.300137	0.16	0.256	1	Fnip1
Abracl	0.000173017	0.310686	0.403	0.285	1	Abracl
Ptn	0.000173922	-0.69207	0.179	0.277	1	Ptn
2410006H16Rik	0.000177027	0.347045	0.607	0.508	1	2410006H16Rik
Dnajc19	0.000178091	0.269601	0.438	0.318	1	Dnajc19
Ift43	0.000180157	0.254632	0.242	0.132	1	Ift43
Ssbp3	0.000180526	-0.253342	0.285	0.401	1	Ssbp3
Mrps33	0.000185745	0.300296	0.469	0.339	1	Mrps33
Mbnl2	0.000187319	-0.309628	0.36	0.471	1	Mbnl2
Rer1	0.000189357	0.32799	0.482	0.376	1	Rer1
Trim30a	0.000189572	0.326415	0.323	0.207	1	Trim30a
Mrpl34	0.000197493	0.308828	0.353	0.236	1	Mrpl34
Zmiz1	0.000199181	-0.350036	0.349	0.455	1	Zmiz1
Mtch1	0.000199733	0.319363	0.683	0.587	1	Mtch1
Cd63	0.000202425	0.296199	0.795	0.702	1	Cd63
Eif3i	0.000203191	0.33754	0.525	0.43	1	Eif3i
Vps29	0.000204768	0.302073	0.42	0.302	1	Vps29
Aurkaip1	0.000215769	0.299658	0.317	0.202	1	Aurkaip1
Kmt2e	0.000215947	-0.271401	0.364	0.488	1	Kmt2e
Itm2a	0.00022069	0.284167	0.395	0.244	1	Itm2a
Pi15	0.000221031	0.369254	0.319	0.207	1	Pi15
Arf3	0.00022105	0.302088	0.348	0.24	1	Arf3
Maf	0.000227089	-0.301694	0.637	0.723	1	Maf
Enpp2	0.000228045	-0.278361	0.11	0.194	1	Enpp2
Spon2	0.000230679	0.39399	0.327	0.211	1	Spon2
Pnn	0.000232209	-0.307189	0.229	0.326	1	Pnn
Mrps17	0.000237235	0.324655	0.308	0.202	1	Mrps17
Dnlz	0.000238671	0.251277	0.272	0.165	1	Dnlz
Pdzd11	0.000250037	0.253428	0.164	0.074	1	Pdzd11
Spsb1	0.000254336	-0.277424	0.189	0.293	1	Spsb1
2310009A05Rik	0.000256977	0.302595	0.262	0.157	1	2310009A05Rik
Ubxn1	0.000272666	0.285453	0.543	0.409	1	Ubxn1
Tmem167	0.000274969	0.319275	0.507	0.393	1	Tmem167
Snx3	0.000275207	0.308438	0.453	0.339	1	Snx3
Emg1	0.000277798	0.26091	0.377	0.269	1	Emg1
Bola3	0.000284551	0.331529	0.359	0.256	1	Bola3
Mocs2	0.000286403	0.337038	0.373	0.273	1	Mocs2
Fam102b	0.000287589	-0.289673	0.533	0.632	1	Fam102b
Erbin	0.000290188	-0.260152	0.208	0.31	1	Erbin
Exosc7	0.000290922	0.284885	0.185	0.095	1	Exosc7
Supt4a	0.000303409	0.298144	0.372	0.26	1	Supt4a
Srp9	0.000306507	0.291634	0.582	0.492	1	Srp9
Dcun1d5	0.000312138	0.303611	0.279	0.169	1	Dcun1d5
Atp6v0e	0.000313998	0.306915	0.547	0.426	1	Atp6v0e
Dnajb1	0.000315908	0.39527	0.234	0.132	1	Dnajb1
Dph3	0.000316026	0.382082	0.423	0.322	1	Dph3
Sqstm1	0.000319509	-0.304488	0.39	0.492	1	Sqstm1
Etfb	0.000335527	0.264224	0.478	0.364	1	Etfb
Snrpb	0.000338261	0.287168	0.556	0.438	1	Snrpb
Tra2b	0.000358345	-0.273068	0.212	0.314	1	Tra2b
Srm	0.000368269	0.287618	0.213	0.12	1	Srm
Kctd17	0.000368823	0.283369	0.285	0.182	1	Kctd17
Sult5a1	0.000376695	0.306219	0.516	0.401	1	Sult5a1
Bmyc	0.000378371	0.270996	0.255	0.157	1	Bmyc
Mcub	0.000383269	0.275175	0.272	0.165	1	Mcub
Trappc2l	0.000394841	0.285299	0.34	0.227	1	Trappc2l
Gfpt2	0.000397379	-0.403959	0.489	0.562	1	Gfpt2
Smpdl3a	0.000401842	-0.287929	0.248	0.351	1	Smpdl3a
Trir	0.000403438	0.309438	0.474	0.372	1	Trir
Commd1	0.000406813	0.298474	0.382	0.277	1	Commd1
2310009B15Rik	0.00040967	0.282949	0.21	0.116	1	2310009B15Rik
Pdcd6	0.000410273	0.25589	0.411	0.293	1	Pdcd6
Dynlrb1	0.000411408	0.348084	0.723	0.661	1	Dynlrb1
Lgals9	0.000421243	0.334453	0.527	0.409	1	Lgals9
Rora	0.000422153	-0.285801	0.237	0.347	1	Rora
Cryab	0.000430978	0.456406	0.315	0.211	1	Cryab
Prr13	0.000434508	0.388571	0.529	0.438	1	Prr13
Ehd2	0.000444281	0.323415	0.633	0.558	1	Ehd2
Vdac3	0.000455938	0.265303	0.521	0.417	1	Vdac3
Wnk1	0.000456082	-0.323408	0.596	0.682	1	Wnk1
Cltb	0.00046472	0.2688	0.468	0.351	1	Cltb
Tulp4	0.000465984	-0.287375	0.312	0.409	1	Tulp4
Hdac7	0.000474262	-0.342865	0.536	0.636	1	Hdac7
Gnb2	0.000474889	0.283768	0.774	0.731	1	Gnb2
Mien1	0.000475363	0.277429	0.342	0.236	1	Mien1
Tmod2	0.000486059	-0.4095	0.226	0.318	1	Tmod2
Thy1	0.000489945	0.350102	0.723	0.64	1	Thy1
Klf4	0.000494391	-0.278091	0.885	0.909	1	Klf4
Psmb2	0.000502178	0.295189	0.466	0.36	1	Psmb2
Uba52	0.000507449	0.279655	0.308	0.198	1	Uba52
Phb2	0.000516341	0.296888	0.357	0.244	1	Phb2
Pcbd2	0.000518275	0.258271	0.257	0.161	1	Pcbd2
Sec61a1	0.000524872	0.283644	0.449	0.335	1	Sec61a1
Flnc	0.000525334	0.365451	0.399	0.302	1	Flnc
Cd302	0.000527128	0.31227	0.493	0.397	1	Cd302
Apoe	0.000532927	-0.531539	0.05	0.107	1	Apoe
Kidins220	0.000537577	-0.287113	0.196	0.293	1	Kidins220
Fam168a	0.000541852	-0.275891	0.205	0.306	1	Fam168a
Clmp	0.000559363	-0.36263	0.249	0.347	1	Clmp
Nemf	0.000572989	-0.250798	0.127	0.211	1	Nemf
Crebbp	0.00057882	-0.280785	0.365	0.467	1	Crebbp
Mrps34	0.000590205	0.265921	0.253	0.157	1	Mrps34
Apopt1	0.000600507	0.292475	0.228	0.136	1	Apopt1
Zfhx3	0.000600626	-0.344872	0.546	0.607	1	Zfhx3
Zdhhc20	0.000601377	-0.271684	0.184	0.277	1	Zdhhc20
Ankrd11	0.000604597	-0.31131	0.282	0.388	1	Ankrd11
Ap2s1	0.000607885	0.317935	0.393	0.285	1	Ap2s1
Timm23	0.0006113	0.30795	0.294	0.198	1	Timm23
Spcs1	0.000616905	0.268695	0.507	0.384	1	Spcs1
Cd276	0.000619548	0.26391	0.191	0.099	1	Cd276
Fdx1	0.000633255	0.315054	0.309	0.211	1	Fdx1
Phip	0.000636596	-0.340894	0.26	0.364	1	Phip
Htra3	0.000639451	0.31662	0.815	0.789	1	Htra3
Aldh1a3	0.000682254	-0.458153	0.44	0.508	1	Aldh1a3
Arsi	0.000689357	0.326306	0.348	0.244	1	Arsi
Cdk4	0.000704831	0.30232	0.359	0.256	1	Cdk4
Rbis	0.000706012	0.285792	0.385	0.281	1	Rbis
Nt5c	0.000707028	0.312396	0.333	0.231	1	Nt5c
Atp5md	0.000715743	0.308044	0.607	0.496	1	Atp5md
Hnrnpul2	0.000720306	-0.262923	0.414	0.512	1	Hnrnpul2
Dstn	0.00073132	-0.25934	0.748	0.798	1	Dstn
Sf3b5	0.000747912	0.31842	0.451	0.351	1	Sf3b5
Cdc42ep5	0.000757714	0.2549	0.304	0.202	1	Cdc42ep5
Ifi203	0.000761948	0.328087	0.379	0.277	1	Ifi203
C1qtnf6	0.00077438	0.366417	0.295	0.198	1	C1qtnf6
Hspb11	0.000774765	0.25688	0.189	0.103	1	Hspb11
Nox4	0.000777434	-0.304171	0.206	0.302	1	Nox4
Arpc1a	0.000784601	0.253104	0.413	0.302	1	Arpc1a
Kdelr3	0.000797339	0.318098	0.238	0.149	1	Kdelr3
Cdk11b	0.000806193	-0.255839	0.249	0.351	1	Cdk11b
Pamr1	0.000809388	0.348505	0.555	0.438	1	Pamr1
Mgat1	0.000823655	0.311967	0.289	0.194	1	Mgat1
Ski	0.000833519	-0.269286	0.441	0.537	1	Ski
Mpp6	0.000841321	0.284824	0.252	0.157	1	Mpp6
Cks1b	0.000843566	0.284735	0.308	0.211	1	Cks1b
Slfn2	0.000846602	0.296962	0.248	0.145	1	Slfn2
Hsp90aa1	0.000851738	-0.320976	0.601	0.657	1	Hsp90aa1
S100a9	0.000888513	-0.261164	0.326	0.426	1	S100a9
Clic1	0.000890281	0.363788	0.65	0.558	1	Clic1
Map1b	0.000903303	-0.300539	0.308	0.401	1	Map1b
Mdp1	0.000918441	0.251723	0.189	0.103	1	Mdp1
Irf2bp2	0.000936397	-0.301638	0.422	0.521	1	Irf2bp2
Drap1	0.000945311	0.267326	0.583	0.471	1	Drap1
Trnau1ap	0.00100727	0.266221	0.222	0.132	1	Trnau1ap
R3hdm4	0.00103263	0.279995	0.296	0.198	1	R3hdm4
Gemin7	0.00103311	0.258942	0.311	0.215	1	Gemin7
Psmd8	0.00107439	0.291155	0.403	0.302	1	Psmd8
Islr	0.00107521	0.280505	0.734	0.653	1	Islr
Pcbp1	0.00107803	-0.25484	0.473	0.591	1	Pcbp1
Akr1b8	0.00110054	0.284487	0.266	0.174	1	Akr1b8
Esyt1	0.00110187	0.30707	0.257	0.165	1	Esyt1
Bsg	0.00111759	0.280151	0.718	0.616	1	Bsg
Sod1	0.00111851	-0.257951	0.387	0.483	1	Sod1
Tnrc6b	0.00116162	-0.291131	0.43	0.533	1	Tnrc6b
Zfp91	0.0011676	-0.330553	0.308	0.388	1	Zfp91
Tubb4b	0.00117423	0.343833	0.417	0.314	1	Tubb4b
Cav1	0.00118683	0.504026	0.29	0.198	1	Cav1
Hebp2	0.00119216	0.34859	0.38	0.298	1	Hebp2
Lamtor1	0.00120185	0.304976	0.275	0.186	1	Lamtor1
Malsu1	0.00120442	0.268511	0.235	0.149	1	Malsu1
C4b	0.0012113	-0.357705	0.176	0.269	1	C4b
Akr1b3	0.00121301	0.287346	0.332	0.24	1	Akr1b3
Imp3	0.00123234	0.27308	0.322	0.231	1	Imp3
Ubl4a	0.00124666	0.273885	0.234	0.149	1	Ubl4a
Maob	0.00125903	-0.29311	0.111	0.182	1	Maob
Tcf7l2	0.00126246	-0.261306	0.278	0.376	1	Tcf7l2
Pnrc1	0.00126794	0.321811	0.61	0.521	1	Pnrc1
Galnt16	0.00128598	0.30806	0.402	0.31	1	Galnt16
Ypel3	0.00130072	0.287459	0.575	0.488	1	Ypel3
Pla1a	0.00130655	-0.310327	0.305	0.397	1	Pla1a
Kdm6b	0.00134554	-0.253979	0.142	0.223	1	Kdm6b
Ppp1r11	0.00134969	0.288485	0.268	0.182	1	Ppp1r11
Iigp1	0.00136081	0.294963	0.274	0.174	1	Iigp1
Gas7	0.00137174	0.386243	0.689	0.616	1	Gas7
Naa38	0.00139952	0.269114	0.355	0.256	1	Naa38
Kat6a	0.00146159	-0.25632	0.193	0.281	1	Kat6a
Gpnmb	0.00149259	-0.354136	0.214	0.298	1	Gpnmb
Fdx2	0.00150884	0.271703	0.299	0.211	1	Fdx2
Ei24	0.00153267	0.295097	0.262	0.174	1	Ei24
Akr1c18	0.00157894	0.448947	0.325	0.227	1	Akr1c18
Pi16	0.00166286	0.252749	0.896	0.831	1	Pi16
Tmem134	0.00166474	0.284371	0.385	0.298	1	Tmem134
Bmpr1a	0.00172225	-0.288506	0.24	0.331	1	Bmpr1a
Gas1	0.00181196	-0.396123	0.456	0.554	1	Gas1
Jund	0.00182492	0.258748	0.958	0.955	1	Jund
Stub1	0.00182905	0.276103	0.459	0.351	1	Stub1
Phactr2	0.00185964	-0.292546	0.249	0.331	1	Phactr2
Cycs	0.0018727	0.284802	0.311	0.223	1	Cycs
Syne2	0.0018835	-0.281536	0.272	0.364	1	Syne2
Fgf2	0.00191901	-0.269377	0.186	0.269	1	Fgf2
Fkbp2	0.00192412	0.265102	0.576	0.496	1	Fkbp2
Cpne3	0.00193084	-0.270797	0.313	0.397	1	Cpne3
Oasl2	0.00195338	0.324288	0.283	0.194	1	Oasl2
Ndufa11	0.0019536	0.285876	0.548	0.475	1	Ndufa11
Anxa7	0.00197323	0.271527	0.488	0.384	1	Anxa7
Kdelr2	0.00197709	0.281602	0.516	0.421	1	Kdelr2
Mif	0.00208119	0.334553	0.278	0.198	1	Mif
Sppl3	0.00208181	0.284953	0.298	0.207	1	Sppl3
Erp29	0.00213657	0.273358	0.493	0.417	1	Erp29
Mindy1	0.00214891	-0.274431	0.238	0.326	1	Mindy1
Ndufb1-ps	0.00217652	0.26494	0.55	0.459	1	Ndufb1-ps
Oaf	0.0021788	0.39466	0.597	0.521	1	Oaf
Eloc	0.00217955	0.267972	0.429	0.335	1	Eloc
H2afz	0.0022061	0.329465	0.574	0.504	1	H2afz
Mier1	0.00229861	-0.294254	0.355	0.442	1	Mier1
Ndufb2	0.00231654	0.257719	0.524	0.442	1	Ndufb2
Psmb10	0.00233503	0.285933	0.336	0.244	1	Psmb10
Kansl1	0.00234645	-0.269606	0.137	0.207	1	Kansl1
Dctn3	0.00236824	0.250524	0.398	0.31	1	Dctn3
Dpm1	0.00238781	0.262696	0.312	0.227	1	Dpm1
Ifih1	0.00242759	0.258612	0.256	0.165	1	Ifih1
Cited2	0.00242803	0.475656	0.418	0.335	1	Cited2
Nhp2	0.00243249	0.292638	0.232	0.153	1	Nhp2
Fscn1	0.00243543	0.277953	0.118	0.054	1	Fscn1
Rictor	0.00244785	-0.251092	0.12	0.19	1	Rictor
Rcn1	0.00246957	0.274755	0.494	0.401	1	Rcn1
Mgll	0.00247188	0.254045	0.637	0.545	1	Mgll
Rftn1	0.00248933	0.319485	0.242	0.161	1	Rftn1
Glipr2	0.00252763	0.276523	0.398	0.293	1	Glipr2
Ift27	0.00256081	0.252277	0.347	0.26	1	Ift27
Ext1	0.00257983	0.332263	0.429	0.343	1	Ext1
Rassf2	0.00263977	-0.259571	0.135	0.207	1	Rassf2
Eif4g2	0.00267184	0.266079	0.819	0.773	1	Eif4g2
Nfe2l2	0.00267727	-0.294442	0.488	0.574	1	Nfe2l2
Selenof	0.00279937	0.272013	0.699	0.645	1	Selenof
Paip2	0.00285794	0.288284	0.504	0.413	1	Paip2
Srebf1	0.00289398	0.264138	0.172	0.099	1	Srebf1
1110038B12Rik	0.00296878	0.292598	0.238	0.157	1	1110038B12Rik
Wdr83os	0.00297258	0.250077	0.391	0.302	1	Wdr83os
Zfp36	0.00299414	0.52498	0.529	0.475	1	Zfp36
Ccdc12	0.00299798	0.313317	0.396	0.318	1	Ccdc12
Fer	0.00301082	0.261205	0.35	0.264	1	Fer
Selenoh	0.00302999	0.287853	0.262	0.174	1	Selenoh
Gm12840	0.00305922	0.277514	0.1	0.041	1	Gm12840
Prrc2a	0.0030756	0.266462	0.407	0.31	1	Prrc2a
Ldlr	0.00311245	0.300789	0.142	0.074	1	Ldlr
Copg1	0.00312348	0.255873	0.332	0.248	1	Copg1
Klf3	0.00317179	-0.259472	0.667	0.698	1	Klf3
Taldo1	0.00320351	0.262972	0.355	0.273	1	Taldo1
D630033O11Rik	0.00325252	0.270013	0.287	0.194	1	D630033O11Rik
Scara3	0.00326748	-0.264048	0.657	0.74	1	Scara3
Cox17	0.00339655	0.308966	0.363	0.269	1	Cox17
Nmt1	0.00345875	-0.260386	0.202	0.285	1	Nmt1
Dlc1	0.00347309	-0.255526	0.313	0.405	1	Dlc1
Lpl	0.0034745	-0.549725	0.506	0.574	1	Lpl
Slc38a2	0.00350253	-0.304603	0.296	0.393	1	Slc38a2
Zfp638	0.00354194	-0.260591	0.262	0.343	1	Zfp638
Myadm	0.00356995	0.324859	0.465	0.388	1	Myadm
Mydgf	0.00360916	0.253866	0.401	0.314	1	Mydgf
Antxr1	0.0038513	-0.274174	0.694	0.748	1	Antxr1
Tmem229a	0.00388281	0.276563	0.202	0.12	1	Tmem229a
Meg3	0.00390716	0.287689	0.56	0.459	1	Meg3
Vcan	0.00402841	-0.265461	0.437	0.517	1	Vcan
Ercc6l2	0.00403881	-0.254445	0.074	0.128	1	Ercc6l2
Htra1	0.00414966	0.262567	0.785	0.727	1	Htra1
Dek	0.00417637	-0.258731	0.318	0.405	1	Dek
Sfrp4	0.00424663	0.455871	0.439	0.351	1	Sfrp4
Eln	0.00425097	0.311463	0.565	0.479	1	Eln
Daam1	0.0043086	-0.265726	0.2	0.277	1	Daam1
Snrnp27	0.00432049	-0.352119	0.281	0.355	1	Snrnp27
Rnaseh2c	0.00443766	0.250763	0.344	0.252	1	Rnaseh2c
Snu13	0.00450312	0.275242	0.432	0.355	1	Snu13
Map2k2	0.00451337	0.268598	0.365	0.285	1	Map2k2
Hist1h2bc	0.00454476	0.320316	0.22	0.153	1	Hist1h2bc
Grb10	0.0046435	0.35322	0.553	0.483	1	Grb10
Dst	0.0047347	-0.30425	0.409	0.5	1	Dst
Ppp1r15a	0.00476807	0.403252	0.306	0.227	1	Ppp1r15a
Tmem208	0.00509646	0.256208	0.287	0.211	1	Tmem208
Il34	0.00509865	0.28299	0.326	0.24	1	Il34
Opcml	0.00512984	-0.299422	0.498	0.57	1	Opcml
Lamtor5	0.00515202	0.258562	0.395	0.314	1	Lamtor5
Col4a1	0.00533951	-0.394176	0.305	0.38	1	Col4a1
Lpgat1	0.00545511	-0.315742	0.349	0.426	1	Lpgat1
Apod	0.00559321	-1.16274	0.411	0.467	1	Apod
Snrpd1	0.005834	0.292431	0.407	0.335	1	Snrpd1
Eif6	0.00584845	0.257458	0.29	0.211	1	Eif6
Btg2	0.00621999	0.274786	0.326	0.24	1	Btg2
Naaa	0.00656883	0.300203	0.488	0.405	1	Naaa
Zcchc7	0.00693102	-0.257845	0.162	0.231	1	Zcchc7
Arl4a	0.00727906	0.271156	0.372	0.289	1	Arl4a
Copb2	0.00772968	0.278306	0.429	0.364	1	Copb2
Rock1	0.00948617	-0.294248	0.404	0.463	1	Rock1
Il33	0.0096132	0.306285	0.494	0.413	1	Il33
Cxcl13	0.0106546	0.524038	0.308	0.227	1	Cxcl13
Ccdc85b	0.0107815	0.253257	0.471	0.397	1	Ccdc85b
Cdc26	0.0109306	0.258894	0.355	0.277	1	Cdc26
Ptges	0.0124924	0.309206	0.382	0.326	1	Ptges
Sod3	0.0125145	0.274083	0.507	0.43	1	Sod3
Pik3r1	0.0129488	-0.255956	0.415	0.492	1	Pik3r1
Klf10	0.0137838	-0.25518	0.101	0.153	1	Klf10
Slc25a39	0.0138192	0.298759	0.26	0.198	1	Slc25a39
Sned1	0.0138595	-0.361773	0.227	0.293	1	Sned1
Gm10076	0.0143919	0.275734	0.322	0.26	1	Gm10076
Mgst3	0.0162589	0.38371	0.203	0.145	1	Mgst3
Adipor1	0.0171337	-0.253331	0.227	0.293	1	Adipor1
Cxcl14	0.0179498	-0.688585	0.075	0.12	1	Cxcl14
Smim7	0.0180575	0.252296	0.375	0.318	1	Smim7
Hes1	0.0206996	-0.449903	0.111	0.165	1	Hes1
Ywhag	0.0208943	0.25443	0.374	0.314	1	Ywhag
Sp100	0.0222153	0.250556	0.35	0.281	1	Sp100
Errfi1	0.0251691	0.295716	0.58	0.529	1	Errfi1
Capg	0.0252541	0.275089	0.492	0.43	1	Capg
Rian	0.0257415	0.251491	0.257	0.19	1	Rian
Tspo	0.0260335	0.254105	0.689	0.649	1	Tspo
Rbp1	0.0269287	0.297586	0.267	0.194	1	Rbp1
Creb3l1	0.0270232	0.271299	0.431	0.364	1	Creb3l1
Zfp503	0.0289913	-0.265393	0.226	0.285	1	Zfp503
Carhsp1	0.0299206	0.263703	0.385	0.335	1	Carhsp1
Bmp3	0.0299857	-0.314632	0.31	0.368	1	Bmp3
Pdlim4	0.0301126	0.261243	0.348	0.289	1	Pdlim4
F3	0.0303635	0.274278	0.107	0.062	1	F3
Mt1	0.0341445	0.43269	0.769	0.744	1	Mt1
Mafb	0.0347223	-0.325261	0.147	0.198	1	Mafb
Prdm8	0.0370093	-0.271033	0.14	0.19	1	Prdm8
Mt2	0.0382207	-0.281171	0.659	0.686	1	Mt2
Ccn5	0.0433956	0.30928	0.122	0.079	1	Ccn5
Trim2	0.0543878	-0.273071	0.22	0.269	1	Trim2
Cdkn1a	0.0577516	0.298925	0.408	0.355	1	Cdkn1a
Hnrnpab	0.0661881	0.256142	0.463	0.413	1	Hnrnpab
Ccn1	0.069233	0.367304	0.368	0.314	1	Ccn1
Abca8a	0.0864333	-0.255996	0.248	0.289	1	Abca8a
Hmgcs1	0.0961606	0.253391	0.219	0.178	1	Hmgcs1
Igfbp7	0.134052	0.322911	0.275	0.335	1	Igfbp7
Dkk2	0.136942	-0.407604	0.101	0.128	1	Dkk2
Gas6	0.145967	-0.402236	0.208	0.248	1	Gas6
Cdh11	0.162128	-0.288792	0.148	0.178	1	Cdh11
Ifit1	0.192187	0.452023	0.238	0.207	1	Ifit1
Scd2	0.308428	0.265202	0.551	0.533	1	Scd2
Ifitm1	0.309005	0.315158	0.122	0.099	1	Ifitm1
Edn1	0.358862	0.255912	0.276	0.252	1	Edn1
Igf1	0.879266	-0.38465	0.255	0.24	1	Igf1

## Sheet: Sup Table 4
Supp Table 4 Suture CD90 Adult vs Aged	p_val	avg_log2FC	pct.1	pct.2	p_val_adj
Gm42418	1.87443e-15	-2.51733	1	1	6.0516e-11	excluded
Rpl9	1.63473e-10	1.12748	1	0.869	5.27772e-06
Eif1	6.14927e-10	0.769085	1	0.951	1.98529e-05
Rps2	5.00897e-08	1.0473	0.984	0.902	0.00161715
Rpl11	6.8512e-08	0.948986	1	0.918	0.00221191
mt-Nd1	1.8721e-07	-0.980832	0.887	0.951	0.00604408
Fth1	4.06143e-07	0.798749	1	0.984	0.0131123
Lars2	5.167e-07	-1.02412	0.839	0.918	0.0166817
Csrp2	7.02676e-07	1.21095	0.726	0.295	0.0226859
Rps27a	1.64389e-06	0.606955	1	0.984	0.0530729
mt-Nd3	1.99537e-06	-1.05102	0.5	0.77	0.0644204
Cdkn1c	2.89479e-06	1.28091	0.613	0.197	0.0934584
mt-Nd2	3.31984e-06	-0.88244	0.887	0.951	0.107181
Gabarap	3.44982e-06	0.730055	1	0.852	0.111377
Selenom	3.65015e-06	1.26674	0.839	0.508	0.117845
Rps4x	8.23001e-06	0.766388	1	0.934	0.265706
Arf5	1.11697e-05	0.584272	0.919	0.721	0.360613
Nedd8	1.55303e-05	0.707001	0.823	0.541	0.501395
Mdh2	1.72002e-05	0.807395	0.694	0.344	0.555307
Eif5a	1.95783e-05	0.884863	0.774	0.623	0.632085
Ndufb11	1.98495e-05	0.720039	0.855	0.623	0.640842
Cdk4	2.31648e-05	0.822148	0.468	0.115	0.747875
Edf1	2.65852e-05	0.814661	0.855	0.557	0.858303
Rplp0	3.03343e-05	0.845444	1	0.902	0.979342
Hypk	3.59423e-05	0.802456	0.565	0.246	1
Ubb	3.79707e-05	1.09705	0.952	0.852	1
Rpl15	4.67283e-05	0.779763	0.968	0.836	1
Eif3a	4.73642e-05	-0.852493	0.468	0.77	1
Oaz1	4.75081e-05	0.631987	0.984	0.885	1
Park7	4.82331e-05	0.712919	0.806	0.459	1
Hint1	6.72302e-05	0.818623	0.855	0.623	1
Eif3i	6.82801e-05	0.741215	0.597	0.246	1
Rpl22l1	7.47996e-05	0.91221	0.919	0.77	1
Cox8a	7.70682e-05	0.55815	0.968	0.754	1
Rps3	7.86454e-05	0.61577	0.968	0.918	1
Prdx1	8.81783e-05	0.930185	0.871	0.639	1
Ran	0.00010645	0.891	0.694	0.426	1
Ppp1r14b	0.000106737	0.755141	0.871	0.525	1
Zeb2	0.000110406	-0.924735	0.532	0.787	1
Fmod	0.000110812	1.55237	0.258	0.016	1
Chchd2	0.000117868	0.587958	0.952	0.885	1
Psmb2	0.000123663	0.697733	0.694	0.361	1
Selenow	0.000126351	0.711914	0.919	0.82	1
Clk1	0.000150185	-0.618678	0.194	0.525	1
Ndufs5	0.000167767	0.679724	0.774	0.443	1
Rps5	0.000187192	0.68747	1	0.951	1
Selenok	0.00019329	0.670315	0.887	0.738	1
Ppia	0.000201103	0.828885	0.952	0.836	1
Rpl8	0.000210943	0.666274	0.968	0.934	1
Mpc2	0.00021193	0.663958	0.79	0.508	1
Rps20	0.000215366	0.677018	1	0.967	1
Rhoc	0.000236674	0.658451	0.774	0.475	1
Ssna1	0.000248084	0.699686	0.468	0.164	1
Ftl1	0.000249873	0.515973	0.984	0.951	1
Slc25a3	0.000252339	0.5388	0.871	0.59	1
Nenf	0.000255569	0.704665	0.855	0.574	1
Rpsa	0.000262442	0.649693	1	0.918	1
Rpl19	0.000289635	0.60128	1	0.967	1
Atp5j	0.000302753	0.800115	0.823	0.672	1
Rpl18a	0.00033844	0.617653	0.984	0.967	1
Srrm2	0.000351862	-0.484732	0.661	0.787	1
Ndufa12	0.00037832	0.662372	0.516	0.197	1
Rps18	0.000396819	0.702983	0.984	0.836	1
Atp6v1f	0.000403181	0.617515	0.823	0.623	1
Trmt112	0.000409121	0.578854	0.597	0.262	1
mt-Co1	0.000414279	-0.597927	1	0.984	1
Nme2	0.000416005	0.88648	0.919	0.77	1
Prxl2b	0.000417568	0.490205	0.226	0.016	1
1810058I24Rik	0.000429652	0.474847	0.758	0.361	1
Rps10	0.000451408	0.553109	1	0.984	1
Pmm1	0.000458234	0.726027	0.435	0.164	1
Gadd45b	0.000480392	1.28699	0.419	0.148	1
mt-Co3	0.000515326	-0.558893	0.968	0.984	1
mt-Atp6	0.000515369	-0.51916	0.984	1	1
Lrrk1	0.000530881	-0.434354	0.048	0.295	1
Rab28	0.00053574	0.404126	0.323	0.066	1
Hprt	0.000536857	0.487922	0.339	0.082	1
Siva1	0.000588712	0.713677	0.484	0.23	1
Ncor1	0.000599959	-0.591117	0.597	0.77	1
Rps3a1	0.000633164	0.613748	1	1	1
Galnt15	0.000645442	-0.678958	0.097	0.344	1
Gng5	0.000674272	0.50466	0.952	0.803	1
Krtcap2	0.000674919	0.827111	0.742	0.541	1
Serf2	0.000681611	0.562775	0.984	0.934	1
Tmem238	0.000688255	0.361751	0.258	0.033	1
Rpl21	0.000706742	0.587281	0.984	0.902	1
Igfbp6	0.000709081	0.785606	0.903	0.82	1
Ldha	0.000712723	0.626562	0.71	0.393	1
1810037I17Rik	0.000714276	0.585619	0.742	0.459	1
Rps11	0.000775071	0.570666	0.984	0.918	1
Ecrg4	0.000785219	2.61092	0.29	0.066	1
Colgalt1	0.000787184	-0.676138	0.161	0.426	1
Galnt11	0.000796498	-0.689283	0.048	0.262	1
Exosc4	0.000799954	0.426648	0.21	0.016	1
Mrps14	0.000809091	0.575201	0.645	0.361	1
Rpl30	0.000826687	0.499935	0.984	0.951	1
Ncl	0.000873483	-0.576952	0.694	0.869	1
Sumo2	0.00090617	0.679297	0.823	0.623	1
Eef1b2	0.000946992	0.701409	0.935	0.77	1
Ybx3	0.00098947	0.666949	0.774	0.541	1
Arf1	0.000996328	0.552999	0.806	0.607	1
Il11ra1	0.00099925	1.1535	0.645	0.41	1
Pdgfrl	0.0010175	1.19385	0.258	0.049	1
Rps13	0.00107322	0.642524	1	0.885	1
Irak4	0.00107389	-0.413772	0.016	0.197	1
Rpl13	0.00107432	0.573734	1	0.967	1
Clic1	0.00107782	0.769519	0.871	0.672	1
Fau	0.00109369	0.359494	1	0.967	1
Cpt1a	0.00111044	-0.339882	0.016	0.197	1
Shisa3	0.00115408	0.733493	0.161	0	1
Tenm3	0.00115408	0.824436	0.161	0	1
Zfp251	0.00115408	0.272347	0.161	0	1
Rps19	0.00116404	0.612138	1	0.967	1
Ahnak	0.00117426	-0.619353	0.968	0.967	1
Eif3k	0.00117859	0.459994	0.839	0.607	1
Rps12	0.00118491	-0.369044	0.984	1	1
Slc12a6	0.00119921	-0.504829	0.161	0.443	1
Eef1d	0.00123753	0.652078	0.806	0.607	1
Cpz	0.00124763	0.642032	0.194	0.016	1
Gnptg	0.00125657	0.601734	0.355	0.115	1
9130401M01Rik	0.00127447	0.39742	0.29	0.066	1
Chd8	0.00129533	-0.587006	0.145	0.393	1
Dpysl2	0.00130838	-0.490677	0.161	0.443	1
Ndufb9	0.00134307	0.623395	0.774	0.607	1
Cnpy2	0.00134497	0.70885	0.613	0.344	1
1110065P20Rik	0.00137974	0.482107	0.371	0.115	1
Smdt1	0.00142431	0.55219	0.903	0.721	1
Copz2	0.00145727	0.507972	0.5	0.213	1
Msl2	0.00150376	-0.611301	0.129	0.377	1
Atp5g2	0.00152698	0.646421	0.806	0.656	1
Rpl34	0.00154202	0.413186	0.968	0.967	1
Polr1d	0.00154261	0.513266	0.774	0.508	1
mt-Nd5	0.00157664	-0.683304	0.661	0.77	1
Polr2c	0.00160556	0.46678	0.435	0.164	1
Mospd2	0.00163882	0.416502	0.258	0.049	1
Rps15a	0.00165284	0.60647	0.984	0.951	1
Samhd1	0.0016564	-0.740103	0.435	0.689	1
2810001G20Rik	0.00167543	0.313578	0.194	0.016	1
Fbln2	0.00173305	-0.742761	0.371	0.59	1
2310039H08Rik	0.00175497	0.633939	0.403	0.148	1
Actr1a	0.00175824	0.482628	0.226	0.033	1
Dst	0.00176981	-0.615894	0.258	0.525	1
Ndufa13	0.0017848	0.53025	0.839	0.689	1
Gm30211	0.00180703	-0.506685	0	0.148	1
Pld4	0.00180703	-0.368642	0	0.148	1
Csprs	0.00180703	-0.407596	0	0.148	1
Rps7	0.00181731	0.555342	1	0.951	1
Bnip3l	0.00182484	0.490938	0.758	0.525	1
Resf1	0.00183213	-0.701679	0.258	0.508	1
Pik3ap1	0.00186809	-0.596069	0.032	0.213	1
C4b	0.00187047	-0.652286	0.113	0.344	1
Vkorc1	0.00191897	0.85413	0.613	0.426	1
Pex3	0.00200145	-0.615846	0.016	0.18	1
Sec61b	0.0020177	0.523654	0.871	0.705	1
Glud1	0.00202904	-0.62022	0.597	0.787	1
mt-Co2	0.00203094	-0.329044	0.984	0.984	1
Mxra8	0.00208622	0.895709	0.532	0.295	1
Trappc6b	0.00208834	0.482636	0.5	0.246	1
Spib	0.00210615	-0.847732	0.032	0.213	1
Phlda3	0.00217797	0.653514	0.323	0.098	1
Rpl7a	0.00217884	0.520541	0.952	0.836	1
Cenpx	0.00223311	0.550638	0.532	0.246	1
Rpl29	0.00224216	0.514887	0.984	0.852	1
Dctn3	0.00224326	0.609587	0.694	0.41	1
Sap30l	0.00227715	0.536384	0.435	0.197	1
Tmed1	0.00228344	0.402412	0.323	0.098	1
Serpinf1	0.00233135	1.17842	0.887	0.689	1
Prdx4	0.00233769	0.783645	0.419	0.197	1
Aurkaip1	0.00239293	0.503206	0.645	0.361	1
Rer1	0.00243631	0.715642	0.597	0.328	1
Ndufa1	0.00245649	0.509025	0.726	0.475	1
Psma2	0.00251179	0.531959	0.742	0.492	1
Ndufs7	0.00253716	0.601276	0.677	0.426	1
Rps24	0.00254969	0.513595	1	0.967	1
AY036118	0.00257093	-1.00555	0.742	0.852	1
Gpnmb	0.00259982	-0.652822	0.065	0.262	1
Ash1l	0.00263419	-0.535078	0.339	0.557	1
Atpif1	0.00264133	0.567355	0.823	0.607	1
Tubb2a	0.00264307	0.542303	0.5	0.23	1
Hilpda	0.00268573	0.439931	0.177	0.016	1
Ehd4	0.00268712	-0.555976	0.048	0.23	1
mt-Nd4	0.00270121	-0.423893	0.919	0.984	1
Foxd1	0.00270643	0.941164	0.242	0.049	1
Mef2c	0.00270718	-0.717363	0.323	0.574	1
Blmh	0.00271591	-0.655768	0.145	0.361	1
Fcgrt	0.0027591	0.645446	0.629	0.377	1
Dynll1	0.00279527	0.575164	0.903	0.754	1
Alkbh3	0.00286428	0.351774	0.177	0.016	1
Ptpn12	0.00288833	-0.509312	0.081	0.279	1
Eif5b	0.00293688	-0.677285	0.371	0.59	1
Rock2	0.00295785	-0.749815	0.613	0.787	1
Fdps	0.00304069	0.40375	0.21	0.033	1
Spcs2	0.00305913	0.577991	0.71	0.475	1
Cir1	0.00306832	-0.619976	0.177	0.41	1
Bach2	0.00311291	-0.574201	0.065	0.262	1
Ndufa2	0.00312708	0.444204	0.855	0.623	1
Itgb1bp1	0.00317295	0.552344	0.355	0.131	1
Rpl41	0.00321328	0.459157	1	0.967	1
Sri	0.00325913	0.492883	0.79	0.59	1
Dleu2	0.00327125	-0.521713	0.145	0.377	1
Antxr1	0.00327361	-0.561159	0.613	0.721	1
Map3k1	0.00330491	-0.71517	0.129	0.328	1
Abhd11	0.00331516	0.368552	0.21	0.033	1
Rpl14	0.00333879	0.456256	0.984	0.852	1
Atxn10	0.00334625	0.621403	0.613	0.393	1
Rpl10a	0.0033959	0.599716	0.984	0.869	1
Bicc1	0.00339666	-0.434537	0.5	0.705	1
Rassf4	0.00340136	-0.351848	0	0.131	1
Erlin1	0.00340136	-0.320288	0	0.131	1
Rnaset2a	0.00340724	0.446735	0.387	0.148	1
Wbp1l	0.00346519	0.352991	0.5	0.197	1
Naca	0.00347107	0.565068	1	0.803	1
Hsp90ab1	0.00359995	-0.445584	0.952	0.967	1
Epn2	0.00360002	-0.552525	0.081	0.279	1
Trnau1ap	0.00361079	0.459948	0.339	0.115	1
Lsm3	0.00365012	0.452892	0.306	0.098	1
Pts	0.00365012	0.489504	0.306	0.098	1
Uqcrh	0.00367423	0.404333	0.935	0.787	1
Igfbp3	0.00369226	-1.74662	0.032	0.197	1
Txndc17	0.00373685	0.392598	0.79	0.541	1
Gapdh	0.00388016	0.501746	0.871	0.672	1
Eif2b1	0.00395675	0.286693	0.129	0	1
Limk2	0.00395675	0.32429	0.129	0	1
Zcchc24	0.00398915	-0.952041	0.306	0.475	1
Htatip2	0.00404776	0.370957	0.29	0.082	1
Lgals1	0.00408158	0.55433	0.903	0.77	1
Ubc	0.0041033	0.652863	0.903	0.803	1
Mageh1	0.00410786	0.452084	0.258	0.066	1
Rpl23a	0.00412798	-0.418373	0.839	0.918	1
Rpl10	0.00413983	0.598889	0.952	0.836	1
Abhd17a	0.00418688	0.45324	0.468	0.23	1
Ddrgk1	0.00420819	0.585415	0.548	0.295	1
Gm2000	0.00426004	0.52391	0.274	0.082	1
Rpl28	0.00426057	0.517368	0.984	0.918	1
Commd3	0.00426607	0.36818	0.468	0.23	1
Bola3	0.00428275	0.456857	0.306	0.098	1
Atp5j2	0.0043246	0.412011	0.887	0.721	1
Snap47	0.00436281	0.435523	0.274	0.082	1
Ifi209	0.00437638	-0.461623	0.048	0.23	1
Hist1h2bc	0.00444877	0.66999	0.5	0.246	1
Ssr2	0.00457514	0.59746	0.5	0.262	1
Trp53i13	0.00462466	0.466909	0.323	0.115	1
Pigk	0.00462688	-0.577074	0.081	0.262	1
Phax	0.00468921	0.405807	0.339	0.115	1
C130026I21Rik	0.00471218	-0.572001	0.097	0.295	1
Fkbp2	0.0047144	0.568844	0.629	0.492	1
Slc9a6	0.00471934	0.356687	0.161	0.016	1
Bri3	0.00477008	0.477112	0.823	0.639	1
Alas1	0.00479094	0.342717	0.194	0.033	1
Stub1	0.00483001	0.515066	0.5	0.262	1
Yif1b	0.00488309	0.451467	0.258	0.066	1
Laptm4a	0.00491059	0.582907	0.887	0.721	1
Nemf	0.0049383	-0.377817	0.129	0.344	1
Cavin3	0.00500245	0.702645	0.823	0.623	1
Ssr4	0.00500401	0.764008	0.742	0.59	1
Clec11a	0.00502799	0.916338	0.274	0.082	1
Gpr153	0.00505818	0.364295	0.226	0.049	1
Sdhb	0.00507157	0.362654	0.532	0.262	1
Chchd1	0.00507229	0.495542	0.597	0.344	1
AC149090.1	0.00509556	-0.57595	0.226	0.443	1
Vgll3	0.00520399	-0.894418	0.21	0.426	1
Eif3j1	0.00521878	-0.65526	0.129	0.328	1
Rpp25l	0.00524173	0.539627	0.306	0.098	1
Snx3	0.0053176	0.572376	0.613	0.377	1
Ndufaf8	0.00532812	0.535397	0.468	0.23	1
B230208H11Rik	0.00535748	0.440752	0.161	0.016	1
Rnf7	0.00540936	0.564056	0.581	0.328	1
Atp2b1	0.0054279	-0.658406	0.484	0.672	1
Tmem251	0.00546926	0.302017	0.226	0.049	1
Etfb	0.00549112	0.623415	0.516	0.279	1
Eef2kmt	0.0055219	0.305085	0.194	0.033	1
Eif4g3	0.00552732	-0.498847	0.258	0.492	1
Cst3	0.00553587	1.03594	0.919	0.852	1
Ndufv3	0.00557019	0.589898	0.758	0.639	1
Atox1	0.00557055	0.52687	0.774	0.574	1
Akt2	0.00559222	0.487484	0.452	0.213	1
Myoc	0.00560212	-1.81078	0.113	0.295	1
Kitl	0.00561709	-0.859191	0.161	0.344	1
Rassf5	0.00562533	-0.542482	0.065	0.23	1
Arid1b	0.00565399	-0.590237	0.113	0.311	1
Rps29	0.00565771	-0.364187	1	1	1
Pex16	0.00567964	0.335358	0.194	0.033	1
Sf3b6	0.00570223	0.434215	0.661	0.443	1
Plpp1	0.00570492	0.427434	0.161	0.016	1
Bex3	0.00571017	0.525979	0.371	0.148	1
Mrpl33	0.00573851	0.498215	0.887	0.639	1
Cd81	0.00576225	0.804055	0.774	0.656	1
Laptm5	0.00580537	-0.885721	0.387	0.557	1
Csf1	0.005811	-0.996083	0.258	0.459	1
Ssh2	0.00589008	-0.526001	0.29	0.508	1
Rpl32	0.00592394	0.490573	0.984	0.918	1
Il6ra	0.00598471	-0.56246	0.113	0.295	1
Nsg1	0.00603374	-0.475948	0.113	0.311	1
Ndufa4	0.00606406	0.499129	0.903	0.705	1
3830406C13Rik	0.00611997	0.604938	0.323	0.115	1
Xiap	0.00613203	-0.587495	0.226	0.443	1
Ubl5	0.00615851	0.548041	0.871	0.738	1
Slfn5	0.0061741	-0.696631	0.484	0.672	1
Dguok	0.00631583	0.407032	0.387	0.164	1
Fam173a	0.00631584	0.624326	0.403	0.197	1
Cox5b	0.00636631	0.470184	0.758	0.59	1
Aldoa	0.00636743	0.536843	0.742	0.574	1
Ccr2	0.00637909	-1.02112	0	0.115	1
Ccl9	0.00637909	-0.773646	0	0.115	1
Pecam1	0.00637909	-0.328157	0	0.115	1
Tbca	0.00651215	0.659192	0.677	0.508	1
Tbcb	0.00656869	0.54598	0.5	0.279	1
Atp5d	0.00656956	0.502064	0.806	0.508	1
Dock10	0.0066102	-0.630902	0.032	0.18	1
Yeats4	0.00664005	0.40506	0.274	0.082	1
Fyn	0.0066745	-0.589701	0.403	0.607	1
Rpl36al	0.00671772	0.485723	0.919	0.787	1
Cyb5a	0.00672148	0.390633	0.823	0.672	1
Bola1	0.00681671	0.342518	0.339	0.131	1
Mrpl30	0.00681744	0.416982	0.645	0.393	1
Tmem164	0.00684555	0.437907	0.21	0.049	1
Ppib	0.00688269	0.508157	0.855	0.77	1
Gfod1	0.00703918	-0.595513	0.016	0.148	1
Xaf1	0.00712264	0.476033	0.306	0.098	1
Jdp2	0.00715083	0.577212	0.355	0.148	1
Mrpl17	0.00717828	0.494489	0.452	0.246	1
BC031181	0.00720458	0.366621	0.5	0.246	1
Tmem167	0.00723886	0.523607	0.565	0.328	1
Ackr4	0.00726793	-0.424528	0.016	0.148	1
Btg1	0.00726935	-0.726552	0.645	0.787	1
Lsm14b	0.00728482	0.35276	0.113	0	1
Cilp2	0.00728482	0.608524	0.113	0	1
Kcnk5	0.00728482	0.346065	0.113	0	1
Ptgdr	0.00728482	0.374506	0.113	0	1
Apol9a	0.00728482	0.289242	0.113	0	1
Chadl	0.00728482	0.28326	0.113	0	1
Pfdn5	0.00733148	0.452309	0.903	0.836	1
Kdelr2	0.00741415	0.323022	0.613	0.361	1
Arl3	0.00741453	0.534816	0.403	0.18	1
Rpa3	0.0075011	0.353603	0.258	0.082	1
Celf2	0.00753972	-0.579089	0.565	0.721	1
Cops6	0.0075475	0.570489	0.339	0.131	1
Polr2e	0.00759056	0.561219	0.468	0.246	1
Casp1	0.00759301	-0.363068	0.048	0.213	1
Cnnm3	0.00761972	-0.369364	0.032	0.18	1
Anxa1	0.00768302	0.751212	0.935	0.82	1
Usf2	0.00768855	-0.31131	0.194	0.41	1
Polg	0.00774554	-0.366459	0.016	0.148	1
Grpel1	0.00782977	0.415923	0.435	0.197	1
Cd2ap	0.00782977	-0.464796	0.21	0.426	1
Tmem60	0.00786286	0.39215	0.29	0.098	1
Elob	0.00787643	0.490452	0.935	0.77	1
Ndufb3	0.00790974	0.44233	0.581	0.393	1
Pop5	0.00795898	0.38111	0.274	0.082	1
Prrc2c	0.00797433	-0.619354	0.548	0.721	1
Sf3b5	0.00800228	0.466337	0.645	0.426	1
Fkbp1a	0.00801821	0.285225	0.726	0.557	1
Ablim1	0.00806911	-0.523629	0.452	0.607	1
Tgfb1i1	0.00810938	0.483572	0.387	0.164	1
Wls	0.00812951	-0.855218	0.468	0.607	1
H19	0.00817457	2.01726	0.177	0.033	1
Bcl7c	0.00820597	0.48975	0.581	0.328	1
Eif3e	0.00835916	-0.579986	0.468	0.639	1
Uqcr10	0.00839887	0.428274	0.839	0.607	1
Sphk2	0.00840645	0.329244	0.177	0.033	1
Trappc4	0.00844504	0.504684	0.516	0.279	1
Nme1	0.00847418	0.653987	0.565	0.377	1
Wipf1	0.00847774	-0.539447	0.339	0.574	1
Gpx4	0.00855477	0.388362	0.919	0.738	1
Mrpl42	0.00857154	0.2954	0.435	0.197	1
Wnt2	0.00858312	0.785349	0.371	0.18	1
Mrpl28	0.00858312	0.386642	0.387	0.164	1
Cdkn2aip	0.00862977	0.377809	0.21	0.049	1
Tssc4	0.0088517	0.362462	0.21	0.049	1
Mrps28	0.00887654	0.535631	0.355	0.148	1
Calhm5	0.00888794	0.514586	0.177	0.033	1
1300002E11Rik	0.00888794	0.350741	0.177	0.033	1
Lysmd2	0.00891254	0.446571	0.387	0.164	1
Ctsb	0.00906078	-0.554092	0.758	0.852	1
Klhl13	0.00909176	0.343867	0.323	0.115	1
Ptges	0.00912813	0.486157	0.323	0.131	1
Hacd2	0.0091378	0.304775	0.177	0.033	1
Acyp1	0.00914144	0.338028	0.29	0.098	1
Irf2bpl	0.00914144	-0.297125	0.097	0.295	1
Ramac	0.00922755	0.464784	0.355	0.148	1
Atp5g1	0.00937503	0.612883	0.726	0.525	1
Htra1	0.00939346	0.491928	0.79	0.623	1
Chchd7	0.00940064	0.503696	0.306	0.115	1
Ubl4a	0.00940721	0.39634	0.339	0.131	1
Rps15	0.00948689	-0.435984	0.855	0.852	1
Ylpm1	0.00960296	-0.548953	0.048	0.197	1
Crispld1	0.00962949	0.606936	0.258	0.082	1
Smyd2	0.0096564	0.323276	0.177	0.033	1
Oser1	0.0096564	0.298013	0.177	0.033	1
Akr1c18	0.00971922	0.404072	0.274	0.082	1
Ago1	0.00978967	-0.337191	0.032	0.18	1
Pcyt1a	0.00979097	-0.351045	0.113	0.295	1
Tecr	0.00988625	0.428067	0.597	0.377	1
Myo6	0.00992542	0.297712	0.177	0.033	1
Zfp931	0.00994949	0.289235	0.145	0.016	1
Spsb2	0.010058	0.273344	0.242	0.066	1
Cltb	0.010062	0.40264	0.532	0.279	1
Daglb	0.0101956	0.701491	0.532	0.361	1
Alg5	0.0102944	0.463349	0.274	0.098	1
Borcs8	0.0102944	0.378745	0.274	0.098	1
Mrps18a	0.010337	0.386243	0.419	0.213	1
Taf3	0.0103728	-0.46405	0.065	0.23	1
Tcf7l1	0.010374	-0.364455	0.048	0.197	1
Mrpl53	0.0103802	0.37875	0.339	0.131	1
Nipbl	0.010442	-0.807632	0.452	0.59	1
Pdcd2	0.0104836	0.330732	0.177	0.033	1
Chrac1	0.0105447	0.402941	0.387	0.18	1
Sgce	0.0105557	0.437237	0.355	0.148	1
Krt83	0.0105812	0.397509	0.145	0.016	1
Phf6	0.0105812	0.269784	0.145	0.016	1
Ccni	0.0105999	-0.535327	0.226	0.426	1
Slco3a1	0.0106071	-0.519518	0.21	0.41	1
Camk1d	0.0106213	-0.374808	0.065	0.23	1
Med8	0.0106306	0.291606	0.306	0.115	1
Mbnl1	0.0106309	-0.533911	0.565	0.705	1
Eif2ak1	0.0106429	-0.307099	0.048	0.197	1
Wdfy2	0.0106429	-0.389885	0.048	0.197	1
Tmx1	0.0106451	0.495271	0.355	0.164	1
Myl12a	0.0106886	0.527105	0.774	0.541	1
Emp3	0.0108276	0.515406	0.903	0.754	1
0610010K14Rik	0.0108822	0.497512	0.452	0.23	1
Uqcr11	0.0108861	0.409713	0.855	0.607	1
Zfp638	0.0108909	-0.651528	0.306	0.459	1
Heg1	0.0109501	-0.466784	0.355	0.574	1
Col16a1	0.011007	0.746501	0.371	0.164	1
Sec11a	0.0110876	0.41731	0.452	0.246	1
Strn3	0.0110969	-0.541492	0.306	0.475	1
Tnrc6b	0.0111656	-0.532818	0.548	0.672	1
Timm17a	0.0111857	0.497195	0.419	0.197	1
Mrps24	0.0113562	0.485985	0.645	0.41	1
Ccdc85b	0.0114701	0.526657	0.452	0.246	1
Prpf38b	0.0115394	-0.459066	0.29	0.475	1
Surf2	0.0116842	0.271391	0.177	0.033	1
Itpa	0.0116842	0.270511	0.177	0.033	1
Scnm1	0.0116842	0.309013	0.177	0.033	1
Whamm	0.0117302	-0.408042	0.032	0.164	1
Swi5	0.0117987	0.560598	0.71	0.623	1
Thbs1	0.0119108	0.862291	0.565	0.295	1
Bod1	0.0119465	0.442204	0.274	0.098	1
Gtf2b	0.0121626	0.480644	0.339	0.148	1
Pofut2	0.0121626	0.474237	0.339	0.148	1
Napsa	0.0122676	-0.525488	0.113	0.279	1
Zbtb44	0.0122676	-0.610511	0.113	0.279	1
Mrpl54	0.0123532	0.33154	0.532	0.311	1
Neat1	0.0124289	-0.596472	0.581	0.721	1
Dynlrb1	0.0124409	0.421561	0.677	0.426	1
Atp8a1	0.0124599	0.284346	0.274	0.098	1
Sdf2	0.0125392	0.520621	0.468	0.262	1
Gadd45g	0.0126325	1.28044	0.339	0.148	1
Ergic3	0.0126451	0.442297	0.5	0.295	1
Ighm	0.0127311	-1.14825	0.29	0.475	1
Dpt	0.0127362	-0.879062	0.71	0.787	1
Stat5a	0.0127498	-0.377127	0.032	0.164	1
Cox6b1	0.0129836	0.344363	0.855	0.705	1
Mtx1	0.0131913	0.328946	0.194	0.049	1
Rnaseh2c	0.0132291	0.393158	0.468	0.23	1
B3gat3	0.0132665	0.352192	0.274	0.098	1
Setdb1	0.0132854	-0.49825	0.016	0.131	1
Polk	0.0132854	-0.415178	0.016	0.131	1
Npdc1	0.0135316	0.462317	0.581	0.377	1
Rps23	0.0136629	0.389497	1	1	1
Rpl27a	0.013663	0.382647	1	1	1
Isg15	0.0136658	1.11755	0.387	0.213	1
Oat	0.0137123	0.621137	0.629	0.426	1
Uqcrq	0.0137165	0.400891	0.806	0.656	1
Micos10	0.013725	0.469226	0.694	0.475	1
Reck	0.0138782	0.36977	0.339	0.148	1
Ypel3	0.0144475	0.507535	0.742	0.59	1
Sltm	0.0144609	-0.473055	0.339	0.508	1
Ier2	0.0144786	1.074	0.758	0.59	1
Ndufb5	0.0145222	0.447102	0.645	0.426	1
Slc4a10	0.0145672	0.615123	0.194	0.049	1
Rbbp5	0.0145894	-0.351409	0.016	0.131	1
Tpp2	0.0146554	-0.285534	0.065	0.213	1
Tubb5	0.0147962	0.46498	0.661	0.459	1
Smim27	0.0148205	0.433642	0.242	0.082	1
Rpl24	0.0148617	0.512129	1	0.918	1
D8Ertd738e	0.0149546	0.473492	0.806	0.623	1
Setd5	0.0150067	-0.400857	0.177	0.361	1
Cwf19l2	0.0150246	-0.502515	0.21	0.41	1
Phactr4	0.0150269	-0.290913	0.032	0.164	1
Ripor1	0.0150269	0.441058	0.161	0.033	1
Gde1	0.0150476	0.523754	0.274	0.115	1
Scand1	0.0150479	0.509557	0.71	0.574	1
Hsdl2	0.0153015	0.276402	0.194	0.049	1
Adipor2	0.0153537	-0.407424	0.113	0.279	1
Gmppa	0.0154394	0.358224	0.161	0.033	1
Cd180	0.0154394	-0.281428	0.032	0.164	1
Selenof	0.015579	0.666667	0.79	0.672	1
Mpp6	0.0156366	0.506567	0.419	0.213	1
Tmem50a	0.0156834	-0.485825	0.532	0.721	1
Pdia6	0.0157395	0.485827	0.694	0.525	1
Nupr1	0.0158193	0.422771	0.645	0.377	1
Atrx	0.0159137	-0.453783	0.468	0.656	1
Rbm5	0.0159228	0.370729	0.516	0.279	1
Dnajb1	0.0159521	1.01021	0.371	0.18	1
Gstt1	0.0159551	0.559871	0.323	0.148	1
Tma7	0.0160152	0.345763	0.758	0.607	1
Twist1	0.0160559	0.260142	0.758	0.475	1
Emc6	0.0160975	0.37535	0.403	0.197	1
Abi2	0.0162943	0.294725	0.161	0.033	1
Itm2b	0.0163781	0.448631	0.968	0.934	1
Cyp1b1	0.0164528	-0.559795	0.129	0.295	1
Triap1	0.016464	0.302003	0.194	0.049	1
Mtx2	0.0165947	0.448521	0.306	0.131	1
Pgp	0.0165947	0.480589	0.306	0.131	1
Ndufb10	0.0166081	0.506391	0.758	0.557	1
Cuta	0.0166227	0.378786	0.548	0.295	1
Stx8	0.0166554	0.308914	0.403	0.197	1
Nsa2	0.0167356	-0.643814	0.726	0.689	1
Gfra4	0.0167569	0.250573	0.129	0.016	1
Zfp580	0.0167569	0.280935	0.129	0.016	1
Rab7	0.0167798	0.461506	0.581	0.361	1
Hdgfl3	0.0167913	-0.434398	0.161	0.344	1
Gtf3c6	0.0169034	0.328682	0.258	0.098	1
Zfp36l1	0.0169705	-0.483243	0.661	0.754	1
Lamtor2	0.0171552	0.497323	0.597	0.41	1
Hint3	0.0172365	0.322472	0.242	0.082	1
Cryl1	0.0172754	0.292263	0.129	0.016	1
Tarbp2	0.0172754	0.255401	0.129	0.016	1
Tnfsf13	0.0172814	0.378544	0.194	0.049	1
Zfp608	0.0172915	-0.377118	0.048	0.18	1
Syk	0.0174106	-0.523023	0.194	0.361	1
Prdx5	0.0174338	0.672025	0.887	0.672	1
Frmd6	0.0176306	-0.670386	0.242	0.41	1
Snhg11	0.0177033	0.270363	0.194	0.049	1
Cd69	0.0177268	-0.586033	0.048	0.18	1
Lsm2	0.0177466	0.322755	0.29	0.115	1
Trpm3	0.0178078	0.323702	0.129	0.016	1
Msn	0.0179816	-0.558732	0.565	0.672	1
Rtraf	0.0179839	0.501358	0.645	0.475	1
Golga4	0.0180803	-0.572584	0.177	0.344	1
Ost4	0.0181049	0.508782	0.726	0.607	1
Cercam	0.0181299	0.271838	0.161	0.033	1
Rnf40	0.0181299	0.266601	0.161	0.033	1
Igf2	0.0181299	1.22445	0.161	0.033	1
Ptprc	0.0181821	-0.670653	0.403	0.59	1
Eif4e	0.018232	0.49489	0.371	0.164	1
Zfp329	0.0182416	0.352867	0.21	0.066	1
Cdc42ep2	0.0183921	0.450812	0.403	0.213	1
Atp5h	0.018411	0.501805	0.919	0.754	1
Dbnl	0.0184203	-0.460181	0.274	0.443	1
Glod4	0.018495	0.544929	0.323	0.148	1
Dad1	0.0185649	0.62417	0.645	0.525	1
Atp5f1	0.0185705	0.331107	0.774	0.639	1
BC005561	0.0185895	0.414528	0.306	0.131	1
Abcg2	0.0186162	0.374044	0.161	0.033	1
Cfap20	0.0186232	0.3334	0.339	0.148	1
Tcaf1	0.0187258	0.352997	0.258	0.098	1
Col12a1	0.01873	1.08617	0.339	0.18	1
Gnpda2	0.0187668	0.26223	0.242	0.082	1
Pdcd10	0.0190753	0.300477	0.5	0.279	1
Hspb11	0.0191102	0.491751	0.258	0.098	1
Galt	0.0191138	0.293877	0.161	0.033	1
Psmb5	0.0192746	0.476368	0.565	0.443	1
Zfp263	0.0193044	-0.371419	0.065	0.213	1
Eif3h	0.0193397	0.529368	0.661	0.475	1
Luc7l3	0.019397	-0.503855	0.21	0.377	1
U2af1	0.0194064	0.326999	0.419	0.213	1
Pmm2	0.019623	0.256773	0.161	0.033	1
Arpc3	0.0196492	0.343953	0.839	0.656	1
Mfap2	0.019653	0.576908	0.403	0.213	1
Ctbp1	0.0197527	-0.545049	0.258	0.426	1
Rbp1	0.0198887	1.07235	0.403	0.23	1
Timm17b	0.0198928	0.318822	0.323	0.148	1
Prrx2	0.0199285	0.55677	0.29	0.115	1
Ngly1	0.0200113	0.305508	0.339	0.148	1
Atl3	0.0200376	-0.327616	0.21	0.393	1
Serinc5	0.020152	-0.446933	0.065	0.197	1
2310009A05Rik	0.0202046	0.381646	0.387	0.213	1
Ndufa8	0.0203261	0.453223	0.565	0.377	1
Polr2d	0.0204209	0.343484	0.21	0.066	1
Smim19	0.0204542	0.534051	0.306	0.148	1
Naa35	0.0204542	-0.467362	0.145	0.311	1
Polr2f	0.0205609	0.348658	0.548	0.311	1
Atp5e	0.0205797	0.367418	0.935	0.852	1
Rpl35a	0.0206539	0.380644	1	0.967	1
Rras	0.0206724	0.689604	0.5	0.328	1
Thbd	0.0207746	-0.63613	0.323	0.492	1
Il18	0.0209887	0.468241	0.403	0.213	1
Atp2b4	0.0210513	-0.481784	0.048	0.18	1
Arf4	0.0211978	0.540041	0.661	0.525	1
Chmp5	0.0213218	0.337935	0.581	0.344	1
Tspan17	0.0213543	0.284174	0.21	0.066	1
Nfia	0.0214395	-0.491159	0.468	0.607	1
Cd47	0.0216492	-0.41095	0.774	0.852	1
Vwa5a	0.0217271	-0.351307	0.242	0.443	1
Txn1	0.0217289	0.51563	0.919	0.787	1
Raly	0.0217481	0.314835	0.419	0.213	1
Sgk1	0.0217792	-0.336546	0.032	0.148	1
Lypla2	0.0218879	-0.295534	0.081	0.23	1
Mrc2	0.0218965	0.458281	0.452	0.262	1
Baz2b	0.0219359	-0.374467	0.274	0.459	1
Tmem159	0.0219747	0.370302	0.306	0.131	1
Scn1b	0.0221019	0.433839	0.419	0.213	1
Itpr2	0.0221423	-0.494926	0.097	0.246	1
Cnih4	0.0222231	0.400065	0.5	0.279	1
Tgfb1	0.0222627	-0.593386	0.161	0.328	1
Ythdf3	0.022356	-0.377893	0.081	0.23	1
Rhoh	0.022356	-0.479715	0.081	0.23	1
Commd2	0.0225617	0.290633	0.323	0.148	1
C1qtnf2	0.0228255	0.72025	0.242	0.098	1
Atad1	0.0228921	0.374778	0.258	0.098	1
Tpst2	0.0229673	0.314301	0.323	0.148	1
Abhd17b	0.0231851	-0.268341	0.048	0.18	1
Pigp	0.0232952	0.50706	0.452	0.262	1
Snf8	0.0234262	0.382186	0.387	0.213	1
B4galt3	0.0236025	-0.290954	0.032	0.148	1
Kctd17	0.0236025	-0.285943	0.032	0.148	1
Mau2	0.02364	-0.46223	0.065	0.197	1
Col8a2	0.023747	0.57589	0.177	0.049	1
Atn1	0.0238519	0.305492	0.21	0.066	1
Lynx1	0.0238519	0.299533	0.21	0.066	1
Glis2	0.0238519	0.35628	0.21	0.066	1
Wfdc1	0.0239189	0.592513	0.145	0.033	1
Mfap1a	0.0240048	-0.379759	0.097	0.246	1
Psmb4	0.024008	0.42039	0.661	0.492	1
Marcks	0.0240283	-0.629828	0.887	0.951	1
Adamts15	0.0240779	-0.447666	0.145	0.295	1
Aff3	0.0241788	-0.368686	0.065	0.197	1
Ccn5	0.024239	-0.54288	0.032	0.148	1
Cdc42ep4	0.0243207	0.352022	0.177	0.049	1
Higd1a	0.024321	0.371565	0.484	0.295	1
Cs	0.0245108	-0.395719	0.145	0.311	1
Abracl	0.0247222	0.416447	0.532	0.377	1
Wwp2	0.0247282	-0.40998	0.065	0.197	1
Zfp280d	0.0248292	-0.424613	0.081	0.23	1
Cycs	0.024845	0.460187	0.5	0.311	1
0610012G03Rik	0.0248842	0.31269	0.516	0.311	1
Evl	0.0248903	-0.36554	0.032	0.148	1
Gdpd5	0.0249064	0.387403	0.177	0.049	1
Fam160b2	0.0249198	0.278726	0.21	0.066	1
Gga3	0.0249258	-0.343663	0.016	0.115	1
Carmil1	0.0249258	-0.257547	0.016	0.115	1
Mmgt1	0.0249258	-0.272516	0.016	0.115	1
Mettl26	0.0249668	0.339136	0.306	0.131	1
Rpl18	0.0250322	0.413703	0.984	0.984	1
Tns1	0.0250671	-0.508059	0.339	0.492	1
Scaf11	0.0250908	-0.563265	0.419	0.574	1
Scarb2	0.0250917	0.273703	0.323	0.148	1
Cd302	0.0251746	0.627988	0.629	0.508	1
Baz2a	0.0252884	-0.395622	0.065	0.197	1
Amotl2	0.0252918	-0.276601	0.258	0.443	1
Smap1	0.0253272	0.298799	0.629	0.41	1
Crnkl1	0.0253696	-0.472926	0.129	0.295	1
Nol11	0.0254823	-0.495519	0.081	0.213	1
Rock1	0.0255207	-0.48631	0.532	0.639	1
Snrnp27	0.0255453	-0.444682	0.29	0.459	1
Cd2	0.0255568	-0.396509	0.032	0.148	1
Zkscan1	0.0255568	-0.332027	0.032	0.148	1
Psme3	0.0255568	-0.391905	0.032	0.148	1
Brix1	0.0257606	0.293646	0.258	0.098	1
Fxyd5	0.0258695	1.03773	0.661	0.475	1
Chac2	0.0258957	0.3304	0.145	0.033	1
Ncoa7	0.0259449	-0.461327	0.194	0.377	1
Tpm2	0.025981	0.54658	0.274	0.115	1
Dusp2	0.0261145	-0.366811	0.048	0.18	1
Ltf	0.0261524	1.40564	0.226	0.082	1
Hmgn2	0.0262315	0.471199	0.387	0.213	1
Junb	0.0262427	0.814393	0.806	0.672	1
Ppp4r3b	0.0263232	-0.445678	0.29	0.459	1
Taldo1	0.0263819	0.433074	0.758	0.541	1
Mdp1	0.0264217	0.493066	0.258	0.115	1
Utp20	0.0265854	0.33712	0.145	0.033	1
Edil3	0.0265854	0.543973	0.145	0.033	1
Vcpip1	0.0267965	-0.315611	0.129	0.295	1
Ppp1r15b	0.0268874	-0.419451	0.177	0.344	1
Knop1	0.0269276	-0.401336	0.129	0.279	1
Itm2a	0.0271058	0.765983	0.419	0.246	1
Dip2c	0.027152	-0.445888	0.081	0.213	1
Golt1b	0.0272544	0.418189	0.226	0.082	1
Cd48	0.0273107	-0.275952	0.016	0.115	1
Sgk3	0.0273729	0.276164	0.177	0.049	1
Hras	0.0273842	0.270326	0.323	0.148	1
Lsm7	0.0279276	0.360881	0.5	0.311	1
Ppp3r1	0.027934	-0.445101	0.194	0.361	1
Mipep	0.0280123	0.279704	0.145	0.033	1
Hmgcs2	0.0281482	0.379213	0.113	0.016	1
Cdc42bpg	0.0281482	-0.252943	0.016	0.115	1
Mrps12	0.0281696	0.339773	0.435	0.23	1
Samd9l	0.028281	0.535152	0.435	0.246	1
Tradd	0.0283962	0.298713	0.226	0.082	1
H2afz	0.0285588	0.704368	0.726	0.574	1
Arpc1a	0.0285632	0.344119	0.565	0.361	1
Smndc1	0.0285972	0.317519	0.355	0.18	1
Vasn	0.02864	-0.564912	0.403	0.557	1
Prnp	0.0286456	-0.365953	0.452	0.525	1
Mmgt2	0.0287502	0.306231	0.145	0.033	1
Slc9a3r2	0.0287502	0.268685	0.145	0.033	1
Fbxw2	0.0288447	-0.362597	0.161	0.311	1
Rpl38	0.0288697	-0.292199	0.984	0.984	1
Stoml2	0.0289809	0.359167	0.242	0.098	1
Nit2	0.0289824	0.296118	0.226	0.082	1
Pdik1l	0.0290078	-0.335338	0.016	0.115	1
Medag	0.0290446	-0.456066	0.452	0.623	1
Mtln	0.029072	0.426234	0.355	0.18	1
Bub3	0.029072	0.333081	0.355	0.18	1
Gda	0.0292531	-0.52757	0.435	0.607	1
Cep164	0.0293278	-0.316748	0.113	0.262	1
Gmfb	0.0293462	-0.452149	0.161	0.311	1
Mmp14	0.0293506	-0.86063	0.5	0.689	1
Zfp597	0.0295047	0.276416	0.145	0.033	1
Hopx	0.0295259	-0.382524	0.065	0.197	1
Pfn1	0.0295444	0.393747	0.952	0.852	1
Tuba1b	0.0298199	0.37735	0.806	0.623	1
Svil	0.0298325	0.51979	0.742	0.541	1
Golgb1	0.029917	0.399874	0.548	0.328	1
Ranbp2	0.0300182	-0.362694	0.194	0.377	1
Foxp2	0.0301587	0.449917	0.274	0.115	1
Aph1b	0.0301785	0.295624	0.194	0.066	1
Anxa6	0.0302614	-0.458624	0.226	0.377	1
Taf6	0.0302763	0.476294	0.145	0.033	1
Xrcc1	0.0302763	0.316204	0.145	0.033	1
Tardbp	0.0303069	-0.407475	0.226	0.393	1
Higd2a	0.0304508	0.524509	0.5	0.311	1
Rbm42	0.0305372	0.329644	0.355	0.18	1
Hmox2	0.0305372	0.593875	0.355	0.18	1
Plek	0.0305871	-0.689387	0.177	0.328	1
Fndc3b	0.0306676	-0.614949	0.323	0.443	1
Diaph1	0.0307697	-0.58562	0.355	0.525	1
H2-DMb2	0.0307949	-0.253157	0.016	0.115	1
Akr7a5	0.030804	0.256276	0.226	0.082	1
Dtd1	0.030896	0.325417	0.323	0.148	1
Fdx1	0.0309042	0.367669	0.323	0.164	1
Timm23	0.03097	0.361646	0.435	0.246	1
Tmed10	0.0310322	0.486728	0.742	0.623	1
Cox7a2	0.0311298	0.390652	0.823	0.689	1
Nox4	0.0311616	-0.406657	0.129	0.279	1
Dcbld2	0.0311616	-0.517894	0.129	0.279	1
Plgrkt	0.0312014	0.368231	0.419	0.23	1
Sun2	0.0312333	-0.38045	0.113	0.246	1
Btf3	0.0312682	0.303784	0.903	0.885	1
Zfx	0.0312891	0.301298	0.274	0.115	1
9930111J21Rik2	0.0313509	-0.401948	0.145	0.311	1
Ifngr1	0.0314112	-0.668721	0.5	0.623	1
Tlk2	0.0314326	0.283071	0.226	0.082	1
Ankrd28	0.0314661	-0.261733	0.032	0.148	1
Fndc4	0.0317234	0.30013	0.113	0.016	1
Uqcrb	0.0317648	0.38243	0.694	0.541	1
Mien1	0.0317843	0.480849	0.5	0.311	1
Supt5	0.0318967	-0.34981	0.145	0.311	1
Mdk	0.0319398	0.615826	0.242	0.098	1
Fam133b	0.031998	-0.459227	0.194	0.377	1
Cntln	0.0320219	-0.541058	0.145	0.295	1
Rnf220	0.0320731	-0.44957	0.081	0.213	1
Dnajc7	0.0321662	-0.834992	0.242	0.41	1
Pum2	0.0321662	-0.419025	0.242	0.41	1
Pcyox1	0.0322035	-0.299537	0.113	0.262	1
Rasa1	0.0322494	-0.308717	0.097	0.246	1
S100a4	0.0324685	-1.86553	0.242	0.361	1
Smoc2	0.0325892	0.363446	0.355	0.18	1
Nup133	0.0326758	0.318066	0.113	0.016	1
Socs7	0.0326958	0.300025	0.145	0.033	1
Fut11	0.0327389	-0.383692	0.081	0.213	1
Znrd1	0.0327486	0.290322	0.403	0.213	1
Cryab	0.0328053	0.564865	0.339	0.18	1
Gnpnat1	0.0328053	0.489583	0.339	0.18	1
U2af2	0.0330707	-0.505398	0.161	0.311	1
Tvp23b	0.0331865	0.411233	0.274	0.131	1
Gm16286	0.0332885	0.335048	0.435	0.23	1
Arpc4	0.0333379	0.396448	0.548	0.344	1
Fmc1	0.0333753	0.404051	0.419	0.262	1
Ppp1r12b	0.0337202	-0.283182	0.048	0.164	1
Zfp800	0.0337202	-0.299302	0.048	0.164	1
Ctss	0.0341062	-0.737219	0.081	0.213	1
Cops7a	0.0341062	0.344979	0.21	0.082	1
Mllt6	0.0341062	-0.380745	0.081	0.213	1
Guk1	0.0341786	0.448621	0.468	0.295	1
Man2b1	0.0342939	-0.38559	0.29	0.459	1
Mpzl1	0.0343603	0.39415	0.194	0.066	1
Tomm40	0.0344898	0.295584	0.242	0.098	1
Fbln1	0.0345625	0.810695	0.581	0.426	1
Comp	0.0346542	0.361583	0.113	0.016	1
Mrps25	0.0347493	0.431974	0.306	0.148	1
Lamtor1	0.0348757	0.282311	0.468	0.262	1
Zbtb20	0.0348951	-0.523415	0.823	0.836	1
Fam172a	0.0349259	-0.43518	0.145	0.295	1
Pycr2	0.0351034	0.309655	0.194	0.066	1
Basp1	0.0351075	0.436667	0.661	0.443	1
Ptov1	0.0352153	0.490655	0.403	0.246	1
Chst3	0.0353398	-0.362607	0.048	0.164	1
Apaf1	0.0353398	-0.301601	0.048	0.164	1
Id3	0.035341	1.55751	0.661	0.492	1
Mrfap1	0.0354949	0.47209	0.823	0.656	1
Acsl3	0.0358601	0.300809	0.194	0.066	1
Fam20b	0.0358601	0.34728	0.194	0.066	1
Gmps	0.0359546	-0.319521	0.129	0.279	1
Rexo2	0.0360331	0.412535	0.532	0.377	1
Ptprd	0.0361816	0.375783	0.274	0.115	1
Tle5	0.0363216	0.46963	0.79	0.705	1
Uggt1	0.0365958	-0.259759	0.129	0.279	1
Gabarapl2	0.0366093	0.588828	0.677	0.557	1
Tmem158	0.0366656	0.459964	0.403	0.23	1
Phf5a	0.0366683	0.283101	0.339	0.164	1
Rbms1	0.0367334	-0.397809	0.613	0.689	1
Eif4e2	0.0368326	0.273991	0.532	0.295	1
Rpl23	0.0369224	0.400203	1	0.967	1
Lpl	0.0369503	-0.864907	0.355	0.508	1
Clasp2	0.0369877	0.278736	0.21	0.082	1
Gcc2	0.0370047	-0.39379	0.226	0.393	1
Slc4a1ap	0.0370254	-0.354905	0.048	0.164	1
Nptn	0.0373791	0.368662	0.645	0.426	1
Ift52	0.0377396	-0.293989	0.081	0.213	1
Alcam	0.0377396	0.498131	0.21	0.082	1
Tomm22	0.0378688	0.298935	0.629	0.443	1
Siah1a	0.0379202	0.252074	0.242	0.098	1
Purb	0.0380071	-0.544793	0.435	0.557	1
Slc25a4	0.0380419	0.671939	0.726	0.639	1
Aarsd1	0.038132	0.4092	0.306	0.164	1
Crip2	0.0381395	-0.502069	0.226	0.393	1
Wdr43	0.0381774	-0.550318	0.129	0.262	1
Glce	0.0382423	0.340204	0.355	0.18	1
Uvrag	0.0383774	-0.379858	0.113	0.246	1
Ubap1	0.0385045	0.277295	0.21	0.082	1
Scaf8	0.0385296	-0.316062	0.065	0.18	1
Rps21	0.038791	-0.293326	1	0.951	1
Tiparp	0.0388504	-0.402707	0.194	0.344	1
Dab2	0.0388509	0.355901	0.355	0.18	1
Aff4	0.0389548	-0.43594	0.339	0.459	1
Atp5l	0.0391567	0.333727	0.952	0.836	1
Hsd11b1	0.0391767	0.361896	0.355	0.164	1
Tra2b	0.0391888	-0.323788	0.29	0.492	1
Mphosph8	0.0393672	-0.352248	0.145	0.295	1
Mat2a	0.039644	-0.522232	0.371	0.557	1
Ginm1	0.0397399	0.338176	0.484	0.295	1
Adam19	0.0398155	-0.541868	0.113	0.246	1
Rb1	0.0398155	-0.30743	0.113	0.246	1
Ahdc1	0.0399184	-0.42324	0.032	0.131	1
H2-Ab1	0.0399497	-0.553509	0.129	0.279	1
Ndufa7	0.0399817	0.378467	0.726	0.623	1
Fcrla	0.0402303	-0.588126	0.065	0.18	1
Mgp	0.0405268	2.43442	0.355	0.23	1
Prkar2a	0.0405515	-0.283431	0.113	0.246	1
Tmsb10	0.0406881	0.374367	0.935	0.902	1
Paxx	0.0407625	0.413226	0.339	0.18	1
Pim1	0.0408788	-0.81357	0.387	0.508	1
Vit	0.0410446	-0.297592	0.097	0.23	1
Tor2a	0.0410696	0.270502	0.161	0.049	1
Polr2g	0.0411066	0.327347	0.387	0.23	1
Itfg1	0.0413204	-0.28544	0.081	0.197	1
Rpe	0.0415565	0.25198	0.194	0.066	1
Psma6	0.041696	0.448798	0.452	0.279	1
Coa3	0.0417595	0.287719	0.516	0.344	1
Pde8a	0.0417621	0.434223	0.29	0.148	1
Fus	0.0419361	-0.495903	0.565	0.656	1
Paxbp1	0.0420582	-0.443194	0.113	0.246	1
Vamp2	0.0422801	0.313031	0.323	0.164	1
Trpm7	0.042347	-0.436723	0.242	0.377	1
Nr3c1	0.0423672	0.268353	0.629	0.41	1
Sephs2	0.0425295	0.262255	0.21	0.082	1
Ndufv2	0.0425938	0.286656	0.5	0.311	1
Ier5	0.0426761	0.592855	0.403	0.246	1
Pik3r1	0.0429154	-0.296886	0.419	0.623	1
Cpxm2	0.0429838	0.721528	0.161	0.049	1
Col4a1	0.0431695	-0.856317	0.242	0.393	1
Ctnnbip1	0.0431852	0.36056	0.29	0.148	1
Cbx6	0.043206	-0.422356	0.161	0.295	1
Atp13a2	0.0434395	-0.291203	0.097	0.23	1
Arid5b	0.0435473	-0.310724	0.145	0.295	1
Ppp3cb	0.0437279	-0.393244	0.323	0.443	1
Arl4a	0.0438064	0.354702	0.403	0.23	1
Cdk6	0.0438232	-0.381094	0.065	0.18	1
Atp9b	0.0439039	-0.355603	0.081	0.197	1
Dctpp1	0.0439688	0.257532	0.161	0.049	1
Soat1	0.0439906	-0.458045	0.21	0.361	1
Akap13	0.0440338	-0.410498	0.548	0.639	1
Grcc10	0.0440367	0.303183	0.71	0.59	1
Uqcc3	0.0440946	0.285007	0.5	0.295	1
1110012L19Rik	0.0442305	0.292539	0.129	0.033	1
Slc25a17	0.0442495	0.345599	0.258	0.115	1
Afap1	0.0443251	-0.570307	0.226	0.344	1
Clptm1l	0.0443253	0.312244	0.419	0.246	1
Rab5if	0.0445701	0.423901	0.532	0.361	1
Rpl36	0.0448332	0.307532	0.968	0.869	1
Cd63	0.0448883	0.275764	0.79	0.689	1
Rsl1d1	0.0448917	0.362348	0.355	0.197	1
Mark2	0.0449231	-0.546683	0.242	0.377	1
Fam168a	0.0450807	-0.253268	0.129	0.279	1
Leng8	0.0451008	-0.347233	0.097	0.23	1
Calm3	0.0452278	0.302131	0.79	0.59	1
Sbsn	0.0452607	0.492347	0.468	0.295	1
Afg3l1	0.045368	0.302802	0.129	0.033	1
Ly86	0.045368	-0.301774	0.032	0.131	1
Atxn1	0.045368	-0.261951	0.032	0.131	1
Tor1aip2	0.0454028	0.260366	0.355	0.18	1
Mpv17	0.0454675	0.285992	0.274	0.131	1
Nop53	0.0455832	-0.427731	0.339	0.475	1
Atf5	0.0455874	0.37636	0.403	0.213	1
Spin1	0.045719	-0.334142	0.065	0.18	1
1110038F14Rik	0.0458049	0.371315	0.323	0.164	1
AW112010	0.0458714	-0.526194	0.177	0.328	1
Igf1r	0.0459477	-0.539306	0.274	0.41	1
Mogs	0.0459961	0.257695	0.161	0.049	1
Gm34084	0.0459961	0.28089	0.161	0.049	1
Atp5md	0.0460617	0.300631	0.774	0.607	1
Pnpla8	0.0461171	0.363151	0.452	0.295	1
Tmx4	0.0461346	0.284507	0.306	0.148	1
Prdx2	0.0461898	0.354751	0.758	0.525	1
Rbm7	0.0462332	0.383999	0.323	0.18	1
Cflar	0.0464526	-0.356674	0.274	0.443	1
Bhlhe40	0.046499	0.540767	0.242	0.098	1
Col1a1	0.0465153	1.3899	0.952	0.934	1
Bok	0.04653	-0.26004	0.032	0.131	1
Sparc	0.0465316	0.728335	0.968	0.967	1
Tnrc6a	0.0466247	-0.354012	0.355	0.492	1
Erich1	0.0466925	-0.316285	0.065	0.18	1
Rab35	0.0467612	-0.329757	0.161	0.311	1
Tnfaip2	0.0470892	-0.688204	0.355	0.508	1
Eif2s1	0.0472964	0.38954	0.339	0.18	1
Srsf9	0.0475166	0.467848	0.468	0.311	1
Hexa	0.0475171	0.418631	0.484	0.295	1
Ddx21	0.0475413	-0.31643	0.194	0.344	1
Sdf2l1	0.0478471	0.397187	0.274	0.131	1
Neo1	0.0478479	0.392942	0.274	0.131	1
Rpl5	0.0478804	-0.26901	0.887	0.82	1
Uqcc2	0.0482036	0.419709	0.677	0.557	1
Eloc	0.0482696	0.398565	0.613	0.459	1
Timm8b	0.0482774	0.257354	0.565	0.361	1
Klf4	0.0483547	-0.583713	0.677	0.787	1
Pias1	0.0484392	-0.397758	0.161	0.295	1
Fryl	0.0486919	-0.364111	0.065	0.18	1
Dgcr6	0.049172	0.272935	0.258	0.115	1
S100b	0.0494898	0.531973	0.226	0.098	1
Etnk1	0.0495336	-0.523012	0.194	0.328	1
Naxd	0.0495342	0.311517	0.339	0.18	1
Zfp704	0.0496154	-0.359299	0.129	0.262	1
Runx1	0.0497183	-0.458752	0.065	0.18	1
Osbpl9	0.0500254	-0.288767	0.242	0.426	1
Gm973	0.0501674	0.439187	0.129	0.033	1
Kdm4c	0.0501674	0.259698	0.129	0.033	1
A630072M18Rik	0.0501674	0.376365	0.129	0.033	1
Rnmt	0.0502874	0.344582	0.161	0.049	1
Specc1l	0.0503206	-0.332376	0.113	0.246	1
Aspn	0.0504743	-0.292267	0.355	0.492	1
Ap3d1	0.0506455	-0.258472	0.161	0.311	1
Spcs1	0.0507096	0.318274	0.645	0.492	1
Lrpap1	0.0507533	0.451443	0.468	0.279	1
Pptc7	0.0507627	-0.307106	0.065	0.18	1
Ide	0.0508397	-0.427265	0.161	0.295	1
Rps27l	0.0510032	0.261255	0.871	0.672	1
Akna	0.0511198	-0.365093	0.097	0.213	1
Bmp1	0.0511543	0.381916	0.597	0.393	1
Hnrnpr	0.0511567	-0.381509	0.387	0.541	1
Chl1	0.0514317	0.399883	0.129	0.033	1
Rps25	0.0516942	-0.383751	0.952	0.869	1
Rfk	0.0518008	0.459991	0.258	0.115	1
Pid1	0.0520475	0.318429	0.274	0.131	1
Dapk3	0.0520475	0.36418	0.274	0.131	1
Syne2	0.0520729	-0.457831	0.194	0.344	1
Csrp1	0.0521267	0.384087	0.242	0.115	1
5031425E22Rik	0.0522184	-0.341337	0.129	0.262	1
Nxn	0.0523638	0.311556	0.177	0.066	1
Gm49359	0.0527225	0.286111	0.129	0.033	1
Tomm5	0.0533706	0.390601	0.565	0.393	1
Sptbn1	0.0534555	-0.395938	0.871	0.902	1
Plaa	0.0535268	-0.480422	0.048	0.148	1
Nfatc1	0.0535268	-0.414659	0.048	0.148	1
Adgrg2	0.0535268	-0.430275	0.048	0.148	1
Dhx9	0.0536001	-0.385178	0.177	0.311	1
Yif1a	0.0536001	0.269777	0.323	0.164	1
Alpl	0.0536614	0.457629	0.21	0.082	1
Gnai2	0.0538185	-0.362948	0.79	0.902	1
Mgst2	0.0539868	0.309572	0.242	0.115	1
Bod1l	0.0540575	-0.525554	0.355	0.475	1
Phf20	0.0544035	-0.29149	0.177	0.328	1
Immp1l	0.0544372	0.272871	0.323	0.164	1
Cbfa2t3	0.0545722	-0.307725	0.081	0.197	1
Psap	0.0545782	-0.609507	0.855	0.869	1
Mtss1	0.0547542	-0.338359	0.048	0.148	1
Rnasek	0.0547716	0.282576	0.758	0.541	1
H2-Eb1	0.0549346	-0.56226	0.129	0.262	1
Wdr82	0.0552241	-0.284523	0.097	0.23	1
Phpt1	0.0552283	0.463399	0.306	0.164	1
Eif2s3x	0.0552852	-0.447939	0.177	0.311	1
C1qtnf4	0.0553854	0.327195	0.129	0.033	1
H3f3b	0.0555318	0.33425	0.952	0.967	1
Psma1	0.055549	0.327049	0.452	0.262	1
Ptbp3	0.0555894	-0.668833	0.419	0.492	1
Wtip	0.0556254	0.331352	0.274	0.131	1
Chd6	0.0558658	-0.46938	0.129	0.262	1
Gars	0.0559019	0.383615	0.242	0.115	1
Tnpo1	0.0559055	-0.277695	0.242	0.393	1
Strip1	0.0560051	-0.446303	0.048	0.148	1
Cep290	0.0560051	-0.296778	0.048	0.148	1
Elk1	0.0560051	-0.325204	0.048	0.148	1
Fam120b	0.0561002	-0.376562	0.097	0.213	1
Rp2	0.0561002	-0.346306	0.097	0.213	1
Col6a5	0.0564428	0.441775	0.258	0.115	1
Spag9	0.056451	-0.381371	0.645	0.738	1
BC005537	0.056475	-0.428017	0.419	0.541	1
Hikeshi	0.056962	0.312346	0.371	0.213	1
Trappc6a	0.0569773	0.264357	0.306	0.164	1
Ndufb1-ps	0.0571347	-0.42725	0.613	0.705	1
Fmo2	0.0572796	-0.394154	0.048	0.148	1
Ttf1	0.0572796	-0.26349	0.048	0.148	1
Ankrd10	0.0572796	-0.42105	0.048	0.148	1
Dpm3	0.0574088	0.250933	0.774	0.623	1
Gstm1	0.0574327	-0.388717	0.597	0.705	1
Fbln5	0.0574965	-0.530947	0.242	0.393	1
Cstb	0.0576423	0.322635	0.565	0.377	1
Cpsf7	0.0578733	-0.287584	0.113	0.246	1
Tm2d2	0.0579673	0.369271	0.484	0.311	1
Pgls	0.0579797	0.467312	0.694	0.574	1
Snrpb	0.0583163	0.326087	0.677	0.508	1
Mgll	0.0583677	0.523782	0.548	0.393	1
Mrpl11	0.0584413	-0.365327	0.145	0.262	1
Csk	0.0587881	-0.323544	0.177	0.311	1
Rpl27	0.0587976	0.38702	0.968	0.885	1
Nr1d1	0.0589532	-0.337808	0.081	0.197	1
Rpl13a	0.0590686	-0.309962	0.919	0.885	1
Trpc4ap	0.0591065	-0.539886	0.21	0.328	1
Nr4a1	0.0591083	0.621269	0.403	0.262	1
Thap7	0.0591963	0.357144	0.177	0.066	1
Crispld2	0.0593467	0.472334	0.226	0.098	1
Manf	0.0594171	0.783903	0.548	0.492	1
Psmb8	0.0594171	0.355713	0.613	0.426	1
Chil3	0.0595208	1.29355	0.194	0.082	1
Slc7a2	0.0595208	0.527249	0.194	0.082	1
U2surp	0.0595861	-0.508555	0.387	0.508	1
Csad	0.059723	-0.295412	0.129	0.262	1
Pdlim2	0.0597724	0.3665	0.581	0.41	1
Cyth4	0.0599011	-0.401227	0.048	0.148	1
Tspo	0.0599054	0.508499	0.742	0.607	1
Psma3	0.0600685	0.29571	0.726	0.541	1
Churc1	0.0603393	0.292395	0.452	0.279	1
Ythdf2	0.0603697	-0.326588	0.097	0.213	1
Ppa1	0.0604397	0.404133	0.355	0.213	1
Ndrg2	0.0606696	0.598275	0.194	0.082	1
Rnf20	0.0609495	-0.419307	0.194	0.311	1
Dynll2	0.0611845	0.448734	0.339	0.18	1
Zfp758	0.0612487	-0.290122	0.048	0.148	1
Taf15	0.0615019	0.251867	0.226	0.098	1
Pam16	0.0619895	0.301363	0.242	0.115	1
Ube3a	0.0625828	0.361807	0.548	0.377	1
Phc3	0.0626034	-0.33678	0.097	0.213	1
Twist2	0.0626214	0.308987	0.145	0.049	1
Dnajc14	0.0626214	-0.281932	0.048	0.148	1
Ddhd2	0.0629342	-0.470805	0.113	0.23	1
Mrpl43	0.0629364	0.251579	0.435	0.262	1
Nudt9	0.0631724	0.352267	0.21	0.098	1
Emilin1	0.0634824	0.406764	0.226	0.115	1
Ik	0.0635797	-0.388364	0.323	0.459	1
Rab11b	0.0638148	0.337335	0.532	0.377	1
Dync1i2	0.0639294	-0.586064	0.5	0.607	1
Cygb	0.0642419	-0.434649	0.242	0.393	1
Puf60	0.0644442	0.423324	0.306	0.164	1
Bclaf1	0.0644608	-0.460478	0.355	0.492	1
Psmd2	0.0648815	-0.315414	0.306	0.426	1
Cdkn1a	0.0650817	0.719442	0.371	0.246	1
Ap2a2	0.0652773	-0.410861	0.339	0.508	1
Vrk3	0.065443	-0.312546	0.048	0.148	1
Stk38	0.0654473	-0.302702	0.452	0.59	1
Thoc2	0.0658687	-0.438088	0.242	0.361	1
Sem1	0.0659149	0.267382	0.935	0.934	1
Foxo3	0.0660688	-0.27163	0.081	0.197	1
Ptn	0.0663977	0.974614	0.29	0.164	1
Acin1	0.0666127	-0.495791	0.387	0.475	1
Hcls1	0.0667852	-0.484	0.274	0.393	1
Adprh	0.0667905	0.413651	0.371	0.23	1
Mturn	0.0668301	0.271436	0.339	0.18	1
Mrpl27	0.0669006	0.317809	0.387	0.23	1
Prelp	0.0669361	0.396585	0.484	0.295	1
Capza1	0.0669579	-0.401132	0.29	0.426	1
Tmem14c	0.0670448	0.389467	0.532	0.377	1
Mycbp2	0.0670997	-0.418769	0.435	0.557	1
Mecp2	0.067431	-0.434114	0.113	0.23	1
Cdc73	0.0677963	0.290859	0.29	0.148	1
Washc3	0.0684622	0.33212	0.29	0.164	1
Mlec	0.0684981	0.264684	0.5	0.328	1
Sidt2	0.068666	0.361957	0.371	0.23	1
Pgk1	0.0687682	0.380226	0.452	0.311	1
Ndufc1	0.0692081	0.250134	0.742	0.59	1
Mthfsl	0.0692356	0.292449	0.194	0.082	1
Zwint	0.0692356	0.268302	0.194	0.082	1
Ndufa5	0.0696482	0.282044	0.726	0.508	1
Ikzf1	0.069718	-0.256553	0.097	0.213	1
Cd79b	0.0698608	-0.528673	0.194	0.344	1
Nop56	0.0698695	-0.276763	0.048	0.148	1
Extl2	0.0698712	0.334549	0.145	0.049	1
Lsm8	0.069926	0.271174	0.29	0.148	1
Crybg3	0.0701534	-0.472772	0.129	0.246	1
Ankrd12	0.0701805	-0.497507	0.419	0.525	1
Naa25	0.0703883	-0.272731	0.032	0.115	1
Cnot10	0.0705368	0.280603	0.194	0.082	1
Anapc11	0.070595	0.298277	0.403	0.246	1
Acp1	0.070595	0.311539	0.403	0.246	1
Micu2	0.0706661	0.292986	0.387	0.23	1
Vamp8	0.070779	0.322879	0.661	0.525	1
Sec14l1	0.0708761	0.292646	0.516	0.344	1
Phlda1	0.0709418	0.27029	0.516	0.295	1
Snx33	0.0709744	-0.295325	0.113	0.23	1
Snrpg	0.0710619	0.376119	0.79	0.738	1
Rpl36a	0.0711266	0.382594	0.935	0.836	1
H2-K1	0.0713188	-0.454883	0.774	0.869	1
Lyn	0.0713934	-0.586221	0.274	0.393	1
Fam136a	0.0714009	0.275258	0.145	0.049	1
Ifit3	0.0714009	0.383815	0.145	0.049	1
Numa1	0.0715186	-0.33441	0.306	0.443	1
Ddx17	0.0715372	-0.323649	0.548	0.672	1
Ncaph2	0.0715967	0.432553	0.21	0.098	1
Tnpo3	0.0717191	-0.347247	0.194	0.311	1
Atp8b2	0.0718579	0.285252	0.194	0.082	1
Smarca2	0.0721412	-0.289225	0.403	0.508	1
Gba	0.0721454	-0.262048	0.032	0.115	1
Cecr2	0.0721454	-0.446506	0.032	0.115	1
Erh	0.0722189	0.317898	0.177	0.066	1
Irf8	0.0722321	-0.403222	0.097	0.213	1
Iars2	0.0724345	-0.355555	0.145	0.279	1
Bmpr2	0.0724393	-0.377773	0.306	0.443	1
Igsf8	0.0725261	-0.285503	0.081	0.197	1
Dync2h1	0.072553	-0.302271	0.081	0.18	1
Rpl35	0.0725592	-0.341275	0.871	0.852	1
Rabac1	0.0727215	0.560474	0.742	0.639	1
Vps4a	0.0728721	0.332287	0.21	0.098	1
Rps27rt	0.0728978	-0.295837	0.194	0.328	1
Ezr	0.0731591	-0.280061	0.306	0.475	1
Zmiz1	0.0733478	-0.349567	0.29	0.426	1
Ankrd11	0.0733934	-0.444929	0.452	0.541	1
Gm26532	0.0736764	1.28948	0.355	0.213	1
Numb	0.0738776	-0.257538	0.081	0.197	1
Mme	0.0739381	-0.262949	0.032	0.115	1
Abcc9	0.0739381	-0.457731	0.032	0.115	1
Fbxw7	0.0739409	-0.276878	0.081	0.18	1
St3gal4	0.0740426	0.366382	0.226	0.115	1
Phf14	0.0740476	-0.333819	0.226	0.377	1
Fgfr1	0.0740782	-0.407973	0.613	0.721	1
Gm26917	0.0740856	-0.44298	0.323	0.459	1
Hnrnpul2	0.0742679	-0.403474	0.452	0.541	1
Lsp1	0.0742821	-0.442499	0.581	0.672	1
Ar	0.0742959	-0.315124	0.516	0.689	1
Coro1c	0.07435	-0.343573	0.161	0.279	1
Ppl	0.0743927	-0.381652	0.065	0.164	1
Cnpy4	0.0745611	0.277363	0.194	0.082	1
Zhx1	0.0745726	-0.401593	0.129	0.23	1
Mmp2	0.0746787	0.431836	0.839	0.721	1
Pxn	0.0749129	-0.441146	0.194	0.311	1
Cyba	0.0749308	0.399649	0.839	0.672	1
Map1lc3a	0.0752806	0.344276	0.597	0.41	1
Matn4	0.0753505	1.26773	0.177	0.082	1
Adam8	0.0754911	0.311426	0.29	0.148	1
Arl6ip1	0.0755524	-0.465867	0.645	0.754	1
Eif1ax	0.0755731	0.348697	0.371	0.23	1
Tm9sf2	0.0756441	-0.366665	0.306	0.459	1
Fis1	0.0757464	0.26113	0.71	0.59	1
Zfp318	0.0757672	-0.3154	0.032	0.115	1
Utp6	0.075895	-0.25253	0.065	0.164	1
Slc38a9	0.075895	-0.269639	0.065	0.164	1
Ptpn1	0.0759901	-0.513526	0.29	0.393	1
Ccdc12	0.0760425	0.270344	0.581	0.41	1
Chchd10	0.0761421	-0.507777	0.097	0.213	1
Ppfibp1	0.0762359	-0.446333	0.306	0.41	1
Nudcd3	0.0762359	-0.275785	0.29	0.426	1
Fuca1	0.0762515	0.436591	0.516	0.377	1
Zranb2	0.0767454	-0.421145	0.306	0.426	1
Svbp	0.0769226	0.394067	0.468	0.311	1
Atp1b1	0.0771255	-0.41045	0.226	0.377	1
Dnajc4	0.0773467	0.27315	0.194	0.082	1
Mylip	0.0777276	-0.465289	0.306	0.426	1
Sema4b	0.0782354	-0.371742	0.081	0.18	1
Rab6b	0.0782354	-0.327851	0.081	0.18	1
Ildr2	0.0782922	-0.379939	0.194	0.328	1
Srpx2	0.0785193	-0.45758	0.113	0.23	1
Tprgl	0.0792311	0.462495	0.565	0.426	1
Plat	0.0792813	-0.424256	0.403	0.525	1
Eef1a1	0.0796433	0.298184	0.984	1	1
Treml2	0.0797112	-0.4174	0.081	0.18	1
Esd	0.0797904	0.443559	0.613	0.574	1
Ids	0.0798731	-0.281805	0.129	0.246	1
Ap2s1	0.079947	0.288417	0.484	0.344	1
Capn2	0.0800323	0.336698	0.452	0.311	1
Serp1	0.0801371	-0.417517	0.548	0.672	1
Tle4	0.0803714	-0.331106	0.097	0.197	1
2810004N23Rik	0.080539	0.463249	0.323	0.197	1
Gas2l1	0.080551	-0.273805	0.065	0.164	1
Ppwd1	0.080551	-0.296324	0.065	0.164	1
Cyfip2	0.0805857	-0.376465	0.274	0.377	1
Il33	0.0809264	0.393673	0.484	0.344	1
Rb1cc1	0.0809852	-0.517784	0.435	0.508	1
Ddx54	0.0811748	-0.319156	0.113	0.23	1
Glrx	0.0811755	0.299679	0.258	0.131	1
Kdm6a	0.0812096	-0.369915	0.081	0.18	1
Trim25	0.0813918	0.283533	0.403	0.262	1
Inf2	0.0814768	-0.29186	0.032	0.115	1
Nfya	0.081621	-0.260722	0.097	0.213	1
Iqgap2	0.0818051	-0.410714	0.097	0.197	1
Rps16	0.0822787	0.338779	1	0.934	1
Miat	0.0824615	0.332937	0.113	0.033	1
Acbd4	0.0824615	0.276402	0.113	0.033	1
Csde1	0.0825446	-0.333051	0.597	0.639	1
Ptp4a3	0.0828378	-0.403972	0.194	0.328	1
Atp6v1h	0.0832139	0.279895	0.226	0.115	1
Ndufb8	0.0834606	0.301415	0.645	0.541	1
mt-Atp8	0.0837469	-0.297446	0.629	0.689	1
Bsdc1	0.0837581	0.294248	0.21	0.098	1
Prorsd1	0.0838704	0.352669	0.306	0.18	1
Ecm2	0.0838704	-0.277383	0.177	0.311	1
Psma4	0.0841014	0.283385	0.532	0.393	1
Pqlc3	0.0841891	-0.315158	0.145	0.262	1
Rwdd1	0.0845531	0.38705	0.613	0.475	1
Lilra6	0.0854736	-0.266048	0.032	0.115	1
Tnfrsf13b	0.0858423	-0.408215	0.081	0.18	1
Aak1	0.0859376	-0.276473	0.097	0.213	1
Actn4	0.0859534	-0.373648	0.306	0.426	1
Foxn3	0.0863029	-0.270841	0.177	0.311	1
Abi1	0.0863791	0.337113	0.355	0.23	1
Tcf7l2	0.0864065	-0.354419	0.194	0.311	1
Ube2r2	0.0866246	0.295421	0.597	0.443	1
Ss18l2	0.086676	0.404497	0.21	0.098	1
Pik3ca	0.086845	-0.346334	0.21	0.328	1
Spice1	0.0871171	0.357447	0.161	0.066	1
Cdc42ep5	0.0871849	0.4157	0.339	0.213	1
Son	0.0871957	-0.270226	0.871	0.82	1
Zfp944	0.0875282	-0.306317	0.032	0.115	1
Psmb6	0.087615	0.367569	0.581	0.459	1
Hnrnph2	0.0876259	-0.468984	0.306	0.41	1
Ms4a4d	0.087749	-0.358355	0.097	0.197	1
Rel	0.0877578	-0.251347	0.129	0.262	1
Mga	0.0879148	-0.254835	0.258	0.377	1
Taf10	0.0880981	0.355259	0.597	0.459	1
Mrgprg	0.0881161	0.262505	0.435	0.295	1
Rdm1	0.0881654	0.348271	0.21	0.098	1
Hacd4	0.0882401	0.319688	0.403	0.246	1
Loxl2	0.0882401	-0.523369	0.274	0.377	1
Ubxn7	0.0882813	-0.484578	0.113	0.213	1
Tceal8	0.0883782	0.341526	0.339	0.213	1
G0s2	0.0884799	-0.254711	0.516	0.295	1
Rbfox2	0.0887123	-0.419629	0.226	0.361	1
S100a1	0.088792	0.589163	0.306	0.18	1
Plaat3	0.088792	0.458701	0.306	0.18	1
Nbdy	0.0888548	0.31872	0.226	0.115	1
Gadd45a	0.089045	0.327032	0.403	0.262	1
Zbtb16	0.0890478	-0.334265	0.081	0.18	1
Cisd2	0.0890606	0.352885	0.387	0.246	1
Ramp2	0.0895462	0.553573	0.613	0.459	1
Map2k2	0.0895487	0.332103	0.468	0.344	1
Bcl2l1	0.0898146	-0.283316	0.048	0.131	1
Myb	0.0898146	-0.415677	0.048	0.131	1
Ktn1	0.0902562	-0.339662	0.339	0.443	1
Dnajc3	0.0902768	0.278827	0.694	0.557	1
Clint1	0.0907532	-0.320149	0.548	0.607	1
Vdac1	0.0920936	0.351444	0.419	0.295	1
Npc2	0.0921378	0.388745	0.855	0.787	1
Pigyl	0.0921455	0.269378	0.29	0.164	1
Ckb	0.0923061	0.348159	0.532	0.393	1
Hipk2	0.0923199	0.257787	0.161	0.066	1
Lamtor5	0.0925731	0.285975	0.435	0.295	1
Prpf4b	0.0929084	-0.475215	0.371	0.492	1
Exoc6b	0.0937503	-0.265351	0.048	0.131	1
Frmd4a	0.0940363	-0.252468	0.097	0.197	1
Ube2l6	0.0941086	0.269633	0.161	0.066	1
Mtor	0.0941086	0.289498	0.161	0.066	1
Cog5	0.0941086	0.295891	0.161	0.066	1
Gm26782	0.0941086	0.304083	0.161	0.066	1
Sestd1	0.0944568	-0.310277	0.177	0.295	1
Msl1	0.0955629	0.294028	0.435	0.279	1
Foxp1	0.095829	-0.434297	0.5	0.623	1
Atp5b	0.0959962	0.299363	0.677	0.525	1
Pamr1	0.0960571	0.274552	0.403	0.262	1
Rnase4	0.096185	-0.369649	0.774	0.82	1
Sfxn3	0.096477	-0.337483	0.129	0.246	1
Cdk9	0.0972116	0.364932	0.258	0.148	1
Lman1	0.0973237	0.351393	0.484	0.328	1
Gtf3c2	0.0974843	-0.351439	0.081	0.18	1
Pth1r	0.0974843	-0.537418	0.081	0.18	1
Ube2q1	0.0975935	-0.491625	0.177	0.279	1
Samd8	0.0977693	0.251732	0.161	0.066	1
Arhgap12	0.0977693	0.287693	0.161	0.066	1
Arl6ip6	0.0978231	-0.362755	0.048	0.131	1
Me2	0.0978898	0.433497	0.226	0.115	1
Bzw1	0.0982648	0.6547	0.629	0.508	1
Fkbp7	0.0983064	0.482336	0.371	0.246	1
Sod1	0.0983064	-0.408157	0.242	0.377	1
Ccdc107	0.0986713	0.26436	0.258	0.148	1
Aqr	0.0986747	-0.262226	0.113	0.23	1
Ccnd2	0.099182	-0.585425	0.226	0.344	1
Usp3	0.099182	-0.311523	0.226	0.344	1
Decr1	0.0992459	0.358183	0.177	0.082	1
Fam53b	0.0992459	-0.357981	0.081	0.18	1
Gstm5	0.0992989	0.493844	0.274	0.164	1
Zfp292	0.0998148	-0.411933	0.306	0.393	1
Zfp407	0.0999119	-0.256183	0.048	0.131	1
Lmnb1	0.0999231	-0.486955	0.258	0.377	1
Ubxn4	0.100569	-0.331225	0.419	0.508	1
Zmynd8	0.100652	-0.332811	0.194	0.311	1
Ctsc	0.10068	-0.556142	0.097	0.197	1
Leo1	0.10068	-0.306628	0.097	0.197	1
Micu1	0.100684	-0.337754	0.113	0.213	1
Ubn2	0.100807	-0.313791	0.306	0.426	1
Dap	0.100817	0.294881	0.468	0.344	1
B230118H07Rik	0.100837	0.255698	0.21	0.098	1
Usp9x	0.100855	-0.31683	0.355	0.492	1
Svep1	0.101033	-0.271173	0.081	0.18	1
Cat	0.10104	0.394291	0.339	0.213	1
Eln	0.101664	-0.507554	0.29	0.41	1
Igkc	0.101697	0.410753	0.226	0.377	1
Sra1	0.101842	0.261657	0.565	0.426	1
Camkk2	0.101846	-0.328386	0.177	0.279	1
Hccs	0.102036	-0.339071	0.048	0.131	1
Ptpra	0.102157	-0.462251	0.452	0.508	1
Malat1	0.102282	-0.36724	0.984	0.984	1
Nrbf2	0.102327	0.320745	0.21	0.115	1
Cspp1	0.102398	-0.265536	0.097	0.197	1
Atp5k	0.102422	-0.412278	0.581	0.623	1
Arl6ip4	0.102867	0.360227	0.387	0.279	1
Pias4	0.104007	-0.395455	0.065	0.148	1
Znhit1	0.104065	-0.26427	0.29	0.426	1
E130309D02Rik	0.104196	-0.311304	0.048	0.131	1
Irs2	0.104196	-0.359013	0.048	0.131	1
Smu1	0.104686	0.306443	0.258	0.148	1
Acaa1a	0.104756	0.33359	0.355	0.262	1
Col11a1	0.10529	0.942748	0.129	0.049	1
Cox7c	0.105413	0.281982	0.919	0.77	1
Psmb1	0.105534	0.333492	0.645	0.607	1
Serpinh1	0.105596	0.46793	0.903	0.82	1
Hnrnpab	0.105653	0.312919	0.5	0.328	1
Nbr1	0.105678	-0.280066	0.113	0.213	1
Tm6sf1	0.10604	-0.343855	0.065	0.148	1
Tlk1	0.106342	0.255792	0.371	0.23	1
Zeb1	0.106342	-0.342163	0.242	0.361	1
Ugdh	0.106458	-0.456071	0.435	0.557	1
Scamp2	0.106492	0.307675	0.339	0.213	1
Lsm4	0.106602	0.313762	0.419	0.295	1
H2-Aa	0.107015	-0.276073	0.145	0.262	1
Ubxn1	0.10715	0.378615	0.629	0.508	1
Csgalnact2	0.107375	-0.338516	0.306	0.393	1
Pqlc1	0.107692	-0.302122	0.097	0.197	1
Rtn3	0.107863	-0.291744	0.532	0.656	1
Ufc1	0.108113	0.437203	0.468	0.361	1
Cux1	0.108964	-0.279455	0.161	0.279	1
Cdc42	0.109174	0.311946	0.855	0.82	1
Snrnp70	0.10919	-0.316732	0.484	0.59	1
Socs3	0.10928	0.857764	0.387	0.262	1
Hnrnpa1	0.109344	0.321186	0.565	0.41	1
Gpc1	0.109755	0.283021	0.129	0.049	1
Acox1	0.109755	0.352101	0.129	0.049	1
Ndufs3	0.110733	0.305359	0.339	0.213	1
Cacfd1	0.110867	-0.290232	0.113	0.213	1
Eps8	0.110867	-0.538937	0.113	0.213	1
Dnajc19	0.110879	0.26244	0.452	0.311	1
Rfc2	0.111062	0.3322	0.226	0.115	1
Pbdc1	0.111062	0.250674	0.226	0.115	1
Itgal	0.111491	-0.551635	0.145	0.23	1
Timm13	0.111517	0.287174	0.677	0.525	1
Smarca5	0.111772	-0.330709	0.435	0.541	1
Elavl1	0.111792	-0.343771	0.21	0.311	1
Dgat1	0.111853	0.341333	0.371	0.23	1
Trps1	0.11264	-0.321653	0.113	0.213	1
Atraid	0.113094	0.307578	0.5	0.344	1
Eif2b5	0.113201	0.311094	0.194	0.098	1
Setx	0.113242	-0.332259	0.161	0.262	1
Dmtf1	0.113412	-0.314643	0.145	0.246	1
Vps13c	0.113412	-0.393387	0.145	0.246	1
Rhoq	0.113494	0.266959	0.452	0.311	1
Rbm6	0.113633	-0.269727	0.226	0.328	1
Rbm25	0.113692	-0.363855	0.468	0.525	1
Impdh2	0.11435	0.283534	0.355	0.213	1
Clk3	0.114369	0.252587	0.129	0.049	1
Gse1	0.114489	-0.277998	0.065	0.148	1
Dgcr2	0.114489	-0.330581	0.065	0.148	1
Mrps26	0.115081	0.500697	0.339	0.23	1
Cthrc1	0.116163	1.05884	0.226	0.131	1
Rpl26	0.116251	0.302132	0.984	0.934	1
Nolc1	0.116254	-0.329172	0.113	0.213	1
Aig1	0.116267	0.257004	0.177	0.082	1
Apoe	0.116269	0.496791	0.435	0.295	1
Mib2	0.116732	0.250023	0.129	0.049	1
Set	0.116743	-0.276003	0.548	0.639	1
Rpl22	0.116802	0.255385	0.984	0.885	1
Snw1	0.116998	-0.354665	0.339	0.443	1
Serinc3	0.117355	-0.286571	0.565	0.623	1
S100a11	0.11741	0.309763	0.952	0.934	1
Vat1	0.11749	-0.469276	0.516	0.574	1
St8sia4	0.117932	-0.382965	0.129	0.23	1
Tcea3	0.118095	0.346949	0.21	0.115	1
Cavin1	0.118246	-0.460634	0.758	0.787	1
Fhl1	0.118348	0.313226	0.452	0.328	1
Rab10	0.118413	-0.396066	0.371	0.459	1
Lsm6	0.118457	0.296312	0.468	0.344	1
Ube2s	0.118458	0.295735	0.484	0.328	1
Hsp90aa1	0.118461	-0.801821	0.613	0.672	1
Acadl	0.119055	0.372759	0.387	0.279	1
Asprv1	0.119134	0.353737	0.129	0.049	1
Klf2	0.119569	0.448475	0.823	0.656	1
Itga4	0.119841	-0.296653	0.161	0.262	1
Fmo1	0.119959	0.528139	0.21	0.115	1
Mcc	0.119959	-0.337367	0.113	0.213	1
Polr2h	0.120344	0.303314	0.177	0.082	1
Eif1b	0.120557	0.259336	0.516	0.361	1
Mcee	0.120939	0.263227	0.323	0.197	1
Lgals9	0.120982	0.308224	0.516	0.328	1
Rps27	0.12102	-0.255908	1	0.902	1
Tap1	0.121146	-0.310388	0.226	0.328	1
Foxj2	0.121167	-0.284019	0.065	0.148	1
Sspn	0.121767	-0.354013	0.194	0.295	1
Ttc14	0.121857	-0.321674	0.29	0.393	1
Tra2a	0.121895	-0.405067	0.371	0.508	1
Myh9	0.122141	-0.593749	0.613	0.639	1
Usp19	0.122674	-0.28616	0.21	0.328	1
Ogdh	0.122695	-0.277111	0.21	0.344	1
Erg28	0.12271	0.286054	0.274	0.164	1
Tcerg1	0.122788	-0.28789	0.177	0.295	1
Morf4l1	0.122992	0.267467	0.919	0.803	1
Sel1l	0.123102	0.283798	0.371	0.246	1
Pcmtd2	0.123366	-0.27283	0.129	0.23	1
Ccl11	0.12358	0.455908	0.613	0.492	1
Papss1	0.12369	0.293419	0.242	0.131	1
Armc8	0.123888	-0.404018	0.097	0.18	1
Vcp	0.123965	-0.336932	0.629	0.689	1
Pcgf3	0.124618	0.386198	0.145	0.066	1
Prkra	0.124883	0.252779	0.194	0.098	1
Arhgef12	0.125182	-0.295946	0.468	0.557	1
B2m	0.126576	-0.32488	0.952	0.951	1
Rbfa	0.126737	0.290377	0.274	0.148	1
Tmem245	0.126916	-0.261424	0.097	0.197	1
Ece1	0.127003	-0.260412	0.242	0.344	1
Lrrk2	0.127071	-0.331734	0.177	0.279	1
Atf6	0.127372	-0.336075	0.145	0.246	1
Ric8a	0.127646	0.346985	0.21	0.115	1
Tiprl	0.127901	0.302073	0.403	0.246	1
Atp2a2	0.128043	0.374692	0.468	0.361	1
4833439L19Rik	0.128979	-0.257319	0.097	0.197	1
Ankrd46	0.128979	0.258577	0.194	0.098	1
Gpr108	0.128994	-0.250861	0.129	0.23	1
Spcs3	0.129	-0.388181	0.21	0.311	1
Pdcd11	0.129338	0.256734	0.145	0.066	1
Fam162a	0.129588	0.342294	0.468	0.311	1
Mcts1	0.12963	0.284579	0.274	0.164	1
Dek	0.129801	-0.265603	0.435	0.508	1
Prrc2b	0.130183	-0.394357	0.355	0.475	1
Ccdc88c	0.130539	-0.30414	0.177	0.279	1
Nfatc4	0.13054	-0.272908	0.065	0.148	1
Vdac2	0.131021	0.310587	0.468	0.344	1
Creb3l2	0.13231	-0.31892	0.226	0.328	1
Glcci1	0.132569	-0.295655	0.081	0.164	1
Nisch	0.132888	0.367072	0.597	0.508	1
Chtop	0.132918	-0.255743	0.226	0.344	1
Vsir	0.13374	-0.605087	0.242	0.328	1
Ifrd1	0.133775	0.382671	0.452	0.295	1
Pkn1	0.13408	-0.271332	0.177	0.279	1
Sod3	0.134103	-0.303404	0.258	0.393	1
Npr2	0.134196	0.287916	0.145	0.066	1
Aebp2	0.13449	-0.264625	0.145	0.262	1
Appbp2	0.134523	-0.266084	0.097	0.18	1
Phldb1	0.134565	-0.263136	0.226	0.344	1
Copb1	0.134743	0.356306	0.403	0.311	1
F630028O10Rik	0.134837	0.560668	0.242	0.148	1
Abr	0.134876	-0.250027	0.081	0.164	1
Lifr	0.134876	-0.536404	0.081	0.164	1
Ninj1	0.135016	0.297125	0.274	0.164	1
Card19	0.135689	0.375342	0.387	0.262	1
Eps15	0.135745	-0.341005	0.21	0.311	1
Peli1	0.135787	-0.250455	0.161	0.262	1
C1s1	0.135868	-0.501478	0.629	0.656	1
Pdcd4	0.13601	-0.336339	0.403	0.525	1
Psmd12	0.136494	0.265657	0.371	0.262	1
Spry2	0.136732	-0.289991	0.097	0.18	1
Slc25a39	0.136849	0.345594	0.274	0.164	1
Poc1b	0.137214	-0.275422	0.081	0.164	1
Socs5	0.137214	-0.373951	0.081	0.164	1
Wdfy3	0.137655	-0.30442	0.161	0.262	1
Col6a3	0.138109	-0.407238	0.484	0.557	1
Arid1a	0.138243	-0.276289	0.29	0.41	1
Igfbp7	0.138364	0.752598	0.435	0.311	1
Ddr2	0.138839	-0.47384	0.742	0.705	1
Vmp1	0.138851	0.283161	0.371	0.246	1
Uba1	0.13888	-0.312042	0.387	0.492	1
Ccz1	0.13897	-0.304341	0.097	0.18	1
Mtdh	0.138992	-0.301513	0.548	0.639	1
Ltb4r1	0.139194	0.28533	0.145	0.066	1
Camp	0.139531	1.65664	0.274	0.18	1
Mlh3	0.139583	-0.261131	0.081	0.164	1
Ddx6	0.140023	-0.310157	0.629	0.639	1
Pnrc1	0.140208	0.262956	0.774	0.672	1
Dusp16	0.140466	-0.255568	0.065	0.148	1
Uqcrfs1	0.140629	0.336371	0.403	0.295	1
Smco4	0.140653	0.355859	0.242	0.148	1
Rtf2	0.140761	0.254192	0.339	0.213	1
Naa20	0.140871	0.394488	0.306	0.197	1
Seh1l	0.141235	-0.356738	0.097	0.18	1
Rbis	0.141292	0.311146	0.435	0.295	1
Clip1	0.142013	-0.312948	0.258	0.344	1
Ebf2	0.142232	-0.282674	0.258	0.377	1
Gga2	0.143232	-0.467552	0.113	0.197	1
Lama4	0.143383	-0.413839	0.435	0.492	1
Ssr3	0.144332	0.387429	0.516	0.443	1
Ralbp1	0.144984	-0.302004	0.645	0.721	1
Ubqln1	0.145151	-0.264	0.177	0.279	1
Marf1	0.145151	-0.398642	0.177	0.279	1
Mprip	0.146001	0.341231	0.5	0.393	1
Ifi27l2a	0.146018	0.671585	0.742	0.787	1
Tmem176b	0.146027	0.52168	0.323	0.23	1
Manbal	0.146661	0.339252	0.242	0.148	1
H2afv	0.146687	0.832546	0.645	0.525	1
Aprt	0.146699	0.266954	0.613	0.508	1
D16Ertd472e	0.146878	-0.411215	0.081	0.164	1
Ccnd3	0.146886	-0.330584	0.371	0.492	1
Slc39a9	0.146958	0.258164	0.145	0.066	1
Ddost	0.14736	0.359673	0.548	0.426	1
Paf1	0.147945	-0.359676	0.129	0.213	1
Micos13	0.148117	0.392927	0.613	0.443	1
1810026B05Rik	0.148255	-0.383699	0.177	0.262	1
Ctnnd1	0.148707	-0.382095	0.145	0.246	1
Setd1b	0.148988	-0.47292	0.226	0.311	1
Lrrfip1	0.149199	-0.257203	0.129	0.23	1
Snx13	0.149373	-0.312264	0.081	0.164	1
Tpd52l2	0.149542	0.359917	0.435	0.311	1
Snrpa1	0.149871	0.399118	0.29	0.197	1
Hdgf	0.150032	-0.29022	0.371	0.492	1
Gpcpd1	0.150047	-0.296665	0.21	0.311	1
Trip10	0.150225	0.262498	0.274	0.164	1
Pknox1	0.15058	-0.369273	0.097	0.18	1
Lxn	0.150633	0.392379	0.161	0.082	1
Map3k14	0.150633	0.296126	0.161	0.082	1
Slc25a37	0.151131	-0.362843	0.048	0.115	1
Rab2a	0.151245	0.299336	0.742	0.639	1
Scoc	0.151294	-0.317804	0.161	0.262	1
Fzd2	0.151779	-0.340784	0.194	0.295	1
D10Wsu102e	0.152317	-0.448133	0.129	0.213	1
Id2	0.152354	0.604028	0.371	0.279	1
Sf3b2	0.152853	-0.278747	0.629	0.672	1
Kansl3	0.152863	0.339792	0.242	0.148	1
Slbp	0.152989	-0.319728	0.097	0.18	1
Crebl2	0.152989	-0.299981	0.097	0.18	1
Kif1bp	0.152989	-0.311644	0.097	0.18	1
Pla1a	0.153282	-0.382679	0.226	0.328	1
Reep5	0.153687	0.344419	0.677	0.607	1
Rab8b	0.154038	-0.344392	0.387	0.475	1
Clpp	0.154058	0.300544	0.339	0.246	1
Aif1l	0.154103	0.311359	0.387	0.262	1
Snrpc	0.154262	0.414833	0.355	0.279	1
Tmem59	0.154344	0.32735	0.694	0.607	1
Meox2	0.154461	-0.263705	0.081	0.164	1
Tex264	0.154546	0.328157	0.323	0.213	1
Spsb1	0.15455	-0.340603	0.113	0.197	1
Aplp2	0.154701	-0.314976	0.548	0.607	1
Herc1	0.154901	-0.343929	0.177	0.279	1
Ebpl	0.154901	0.394506	0.274	0.18	1
Tgfb3	0.155049	0.329702	0.145	0.066	1
Ppp2r5c	0.155263	-0.271305	0.323	0.41	1
Hspa13	0.155374	0.335193	0.258	0.164	1
Pls3	0.155697	0.294284	0.306	0.213	1
Cldnd1	0.156108	0.305159	0.371	0.246	1
Pdia3	0.156162	0.30982	0.774	0.754	1
Mt2	0.156473	-0.735216	0.419	0.492	1
Mocs2	0.15648	0.400973	0.419	0.279	1
Emc8	0.156656	0.551321	0.177	0.098	1
Man2a2	0.156892	-0.402072	0.113	0.197	1
Dmpk	0.157303	-0.282716	0.048	0.115	1
Erf	0.157303	-0.255627	0.048	0.115	1
Dennd1b	0.157396	-0.427427	0.161	0.246	1
Brd2	0.15913	-0.409912	0.29	0.377	1
Tcf20	0.159262	-0.335587	0.113	0.197	1
Tspan3	0.159661	0.374993	0.435	0.311	1
Dhx40	0.160374	-0.282901	0.194	0.279	1
Has1	0.16046	-0.480357	0.048	0.115	1
Anxa2	0.160501	0.399916	0.887	0.82	1
Pmf1	0.160628	0.362129	0.145	0.066	1
Ctsz	0.161458	0.274322	0.694	0.443	1
Creb3l1	0.161589	-0.300673	0.258	0.361	1
Galnt2	0.161636	-0.301701	0.21	0.295	1
Mafg	0.161665	-0.347241	0.161	0.246	1
Klf6	0.161752	-0.392922	0.645	0.738	1
Atp6v0a2	0.162432	0.251845	0.226	0.131	1
Zc3h15	0.162659	-0.273759	0.484	0.541	1
Ranbp1	0.163035	0.287218	0.532	0.377	1
Gpx8	0.163134	0.394951	0.468	0.393	1
Trim33	0.163641	-0.250087	0.145	0.246	1
Ikzf2	0.163664	-0.356901	0.048	0.115	1
Trp53rkb	0.163664	-0.259593	0.048	0.115	1
Tnfrsf13c	0.163664	-0.292312	0.048	0.115	1
Mis12	0.16368	0.287339	0.161	0.082	1
Btk	0.164083	-0.297266	0.113	0.197	1
Nsmce1	0.164461	0.296616	0.29	0.18	1
Rgs2	0.164555	-0.428023	0.29	0.377	1
Ppp1r9b	0.164575	-0.337503	0.177	0.262	1
Chd2	0.164694	-0.471927	0.323	0.393	1
Ndn	0.164779	-0.393914	0.355	0.426	1
Gm15417	0.165473	-0.258139	0.097	0.18	1
Arl6ip5	0.165661	0.275643	0.29	0.197	1
Fnip1	0.166021	-0.398363	0.161	0.246	1
Kpnb1	0.166131	-0.497156	0.226	0.311	1
Ubac2	0.166762	0.26841	0.177	0.098	1
Celf1	0.166774	-0.305031	0.274	0.377	1
Ostc	0.166917	0.307954	0.661	0.557	1
Lamtor4	0.166936	0.290379	0.694	0.541	1
Zic4	0.167034	0.254825	0.226	0.131	1
Cep170	0.167265	-0.327171	0.258	0.344	1
Fbxo11	0.167681	0.256859	0.306	0.197	1
Ptprg	0.167756	-0.252808	0.081	0.164	1
Emc10	0.167993	0.263856	0.371	0.262	1
Acp2	0.168059	-0.307929	0.097	0.18	1
Pde3a	0.168059	-0.35871	0.097	0.18	1
Trim30b	0.168059	-0.344832	0.097	0.18	1
Cd300a	0.168059	-0.26707	0.097	0.18	1
Herc2	0.168249	-0.273193	0.29	0.377	1
Mapk3	0.168263	0.289576	0.5	0.361	1
Anp32a	0.168403	0.267921	0.597	0.426	1
Tmem160	0.169075	0.296689	0.516	0.426	1
S100a10	0.169323	0.484873	0.935	0.836	1
Abcc1	0.169363	0.452507	0.177	0.098	1
Tmx3	0.169606	-0.338603	0.29	0.393	1
Tut7	0.169814	-0.278998	0.435	0.541	1
Myo9a	0.170135	-0.43776	0.226	0.311	1
Tubb4b	0.17026	-0.299194	0.435	0.295	1
Dlg4	0.170676	-0.289993	0.097	0.18	1
Ust	0.170792	-0.410558	0.129	0.213	1
Cetn2	0.172614	-0.293587	0.226	0.328	1
Tomm6	0.172744	0.262281	0.742	0.59	1
Actr10	0.172988	0.303882	0.371	0.246	1
Chchd3	0.173214	-0.393376	0.129	0.213	1
Akap11	0.173226	-0.418773	0.177	0.262	1
Fktn	0.173566	0.263845	0.113	0.049	1
Sf3b1	0.173833	-0.464771	0.581	0.574	1
Angptl1	0.174052	-0.527577	0.113	0.197	1
Aco1	0.174657	0.320481	0.177	0.098	1
Cnp	0.174773	-0.260609	0.161	0.262	1
Uhrf2	0.175026	-0.404551	0.194	0.279	1
Calcrl	0.175061	0.305683	0.355	0.23	1
Wwp1	0.175682	-0.383168	0.274	0.361	1
Cd74	0.175698	-0.558776	0.21	0.311	1
Akirin1	0.17611	0.399596	0.274	0.197	1
Setd2	0.176918	-0.360604	0.258	0.361	1
Tspan13	0.177318	0.534793	0.242	0.148	1
Tor1a	0.17735	0.358933	0.177	0.098	1
C1galt1	0.177677	-0.509639	0.177	0.262	1
Cpxm1	0.17798	0.489035	0.484	0.377	1
Acaa2	0.17809	0.301884	0.274	0.18	1
Mrpl4	0.179319	-0.329349	0.161	0.262	1
Sec24b	0.179678	0.276298	0.242	0.148	1
Vipas39	0.179876	-0.296385	0.065	0.131	1
Cotl1	0.180345	-0.482464	0.403	0.508	1
Clcn4	0.18046	0.279255	0.323	0.213	1
Tmem126a	0.180476	0.336784	0.29	0.197	1
Pdzd2	0.180636	-0.277303	0.129	0.213	1
Cd79a	0.182058	-0.520859	0.21	0.311	1
Fzd1	0.182212	-0.313464	0.177	0.262	1
Egfr	0.182446	-0.440635	0.21	0.295	1
Crtc3	0.18258	-0.374735	0.226	0.311	1
Stx7	0.18258	0.263078	0.323	0.213	1
Romo1	0.182908	0.289524	0.726	0.59	1
Sfswap	0.183113	-0.286453	0.145	0.23	1
Nars	0.183139	-0.286026	0.387	0.459	1
Trim26	0.183162	-0.256684	0.129	0.213	1
Snapc5	0.183646	0.28899	0.387	0.279	1
Sfxn2	0.183909	0.252057	0.113	0.049	1
Heca	0.184718	-0.357247	0.226	0.311	1
Ethe1	0.184885	0.317155	0.29	0.197	1
Serpinb9	0.184995	-0.274669	0.081	0.148	1
Apip	0.185614	0.298906	0.177	0.098	1
Abca1	0.186037	-0.430046	0.371	0.443	1
Angptl4	0.1863	0.41399	0.161	0.082	1
Limd1	0.186303	-0.267128	0.161	0.262	1
Ccl6	0.186391	-0.331762	0.21	0.311	1
Dnmt1	0.186427	0.288244	0.226	0.131	1
Adgrd1	0.186785	-0.357035	0.355	0.426	1
Dusp1	0.186798	-0.272171	0.5	0.672	1
Susd6	0.186833	-0.286636	0.177	0.262	1
R3hdm2	0.188363	-0.392603	0.371	0.426	1
Ndufc2	0.188434	0.380217	0.565	0.492	1
Mob1a	0.188483	-0.30327	0.403	0.492	1
Timm10	0.188489	0.260657	0.194	0.115	1
Prpf40a	0.189049	-0.272171	0.387	0.475	1
Stat6	0.189175	-0.306568	0.177	0.262	1
Bsg	0.189285	0.54396	0.71	0.721	1
Phf20l1	0.189763	-0.316495	0.274	0.361	1
Crls1	0.19115	-0.25901	0.081	0.148	1
Nnmt	0.19115	-0.293407	0.081	0.148	1
Ttc33	0.19178	0.263683	0.274	0.18	1
Rnf10	0.192358	0.314551	0.387	0.262	1
Isca1	0.192788	-0.260116	0.097	0.164	1
Zfp422	0.192973	-0.291723	0.065	0.131	1
Ifi30	0.19394	0.313315	0.29	0.197	1
Lvrn	0.194159	0.270306	0.177	0.098	1
Pabpn1	0.1945	0.295238	0.484	0.361	1
Crebbp	0.194967	-0.328603	0.403	0.475	1
Pcbp1	0.195721	-0.34291	0.5	0.557	1
Ccdc25	0.195851	-0.380622	0.21	0.295	1
B3galnt2	0.196354	-0.263173	0.065	0.131	1
Ccnh	0.196354	-0.257167	0.065	0.131	1
P3h4	0.196727	0.400974	0.194	0.115	1
Pcmtd1	0.197912	-0.296132	0.258	0.344	1
Iqgap1	0.198226	-0.252368	0.742	0.77	1
Oaf	0.198836	0.352149	0.5	0.377	1
Plekho2	0.199331	-0.455073	0.339	0.393	1
Mfsd6	0.199364	-0.313511	0.145	0.213	1
Mrpl57	0.199403	0.302993	0.403	0.311	1
Rufy3	0.199778	-0.295092	0.065	0.131	1
Ube4b	0.20022	0.305297	0.21	0.131	1
Shc1	0.200397	0.289885	0.323	0.23	1
Ep300	0.200781	-0.392075	0.29	0.361	1
Serpinb1a	0.201328	0.316643	0.274	0.18	1
Cystm1	0.202151	0.65497	0.113	0.049	1
Chordc1	0.202291	-0.353715	0.258	0.344	1
Eny2	0.202426	0.326571	0.419	0.311	1
Tnrc6c	0.202617	-0.329886	0.355	0.426	1
H1f0	0.202663	0.276917	0.323	0.23	1
Rad21	0.203466	-0.541345	0.339	0.393	1
Arhgap5	0.203569	-0.361441	0.306	0.393	1
Psip1	0.205686	-0.36071	0.371	0.443	1
Add1	0.205686	-0.355343	0.371	0.443	1
Pcolce2	0.205693	-0.305935	0.613	0.721	1
Wrnip1	0.205952	0.257542	0.113	0.049	1
Ier3	0.20596	0.638726	0.306	0.23	1
Smarcc2	0.207125	-0.274688	0.226	0.311	1
Tril	0.207195	-0.307671	0.081	0.148	1
Wdr60	0.207195	-0.260978	0.081	0.148	1
Tmf1	0.20725	-0.27558	0.242	0.311	1
Etf1	0.207275	-0.341904	0.29	0.361	1
Impad1	0.207563	-0.365291	0.21	0.295	1
Nfkb1	0.207731	-0.334425	0.355	0.459	1
Gabra3	0.207992	-0.428925	0.097	0.164	1
Carhsp1	0.209068	0.429132	0.371	0.262	1
Rnf121	0.210517	-0.271814	0.081	0.148	1
Hhex	0.210517	-0.297478	0.081	0.148	1
Srpx	0.210517	-0.2923	0.081	0.148	1
Reep3	0.210909	-0.35274	0.468	0.59	1
Zrsr2	0.211278	0.285207	0.21	0.131	1
Hmgn1	0.211724	0.272643	0.758	0.639	1
4930523C07Rik	0.211834	-0.350418	0.226	0.311	1
Pdcl	0.214311	-0.266069	0.097	0.164	1
Apod	0.21457	-0.486777	0.387	0.459	1
Atxn2	0.214829	-0.302357	0.21	0.295	1
Mrpl23	0.214912	0.323767	0.484	0.41	1
Opcml	0.215158	-0.400899	0.323	0.41	1
Id1	0.215214	0.435529	0.177	0.098	1
Sell	0.216404	-0.611246	0.306	0.361	1
Bank1	0.217522	-0.321709	0.097	0.164	1
Mynn	0.217554	0.3102	0.129	0.066	1
H2afx	0.217554	0.75788	0.129	0.066	1
Mfap4	0.21856	1.22796	0.21	0.148	1
Ccdc32	0.219978	0.308539	0.194	0.115	1
Cops9	0.221189	-0.445415	0.516	0.557	1
Eif4ebp2	0.221341	-0.300165	0.226	0.295	1
Pigs	0.221494	-0.25305	0.113	0.197	1
Ccar1	0.222276	-0.368055	0.21	0.295	1
Rspry1	0.222363	-0.268031	0.194	0.279	1
Tmem176a	0.222944	0.618506	0.258	0.18	1
C1d	0.223014	0.294598	0.371	0.279	1
Twf1	0.223233	-0.264686	0.306	0.393	1
Vps37a	0.224194	0.387141	0.145	0.082	1
Zfp68	0.224866	-0.493559	0.113	0.18	1
Snrpe	0.225831	0.351943	0.677	0.59	1
Prps2	0.226087	0.295605	0.194	0.115	1
Fyb	0.226348	-0.550751	0.242	0.311	1
Chmp4b	0.226736	-0.299284	0.452	0.508	1
Arhgef6	0.226845	-0.360865	0.129	0.197	1
Ly6e	0.228345	-0.417741	0.565	0.607	1
Cyp4f18	0.229046	-0.283308	0.161	0.23	1
Kmt2e	0.229172	-0.329805	0.484	0.541	1
Scara3	0.229172	-0.27347	0.484	0.541	1
Creld2	0.229719	0.403198	0.226	0.148	1
Pmp22	0.230672	0.34269	0.613	0.475	1
Zfp729b	0.231266	-0.356058	0.081	0.148	1
Rspo3	0.232041	0.26812	0.274	0.18	1
Filip1l	0.23271	-0.600438	0.242	0.295	1
Mdm2	0.233062	-0.267681	0.145	0.213	1
Rad23b	0.233063	-0.327193	0.258	0.328	1
Wac	0.234168	-0.366372	0.339	0.393	1
Psmb9	0.234497	0.250328	0.403	0.311	1
Ptprcap	0.235106	-0.334898	0.177	0.262	1
Rnh1	0.235236	0.313028	0.516	0.443	1
Apc	0.235245	-0.332822	0.177	0.246	1
Gas1	0.235666	0.546448	0.468	0.344	1
Vpreb3	0.236227	-0.274077	0.129	0.213	1
Rps6ka3	0.236827	-0.266945	0.323	0.393	1
Atp13a1	0.237514	0.317246	0.161	0.098	1
Sptan1	0.238408	-0.347296	0.387	0.475	1
Akr1a1	0.239124	0.331156	0.565	0.475	1
Cmah	0.239169	-0.272225	0.226	0.295	1
Tsc22d3	0.239603	0.268013	0.403	0.279	1
Dgkd	0.240213	-0.441923	0.194	0.262	1
Polr2a	0.241796	-0.407117	0.226	0.295	1
Plk3	0.242339	-0.532251	0.129	0.197	1
Atp11b	0.244927	-0.27302	0.242	0.328	1
Capzb	0.245505	0.26426	0.677	0.574	1
Suz12	0.245525	-0.285732	0.129	0.197	1
Fmnl1	0.245626	-0.251614	0.242	0.344	1
Gpatch8	0.246169	-0.317385	0.274	0.328	1
Kif1b	0.246567	-0.342789	0.274	0.344	1
Scarf2	0.247084	0.255244	0.21	0.131	1
C1qtnf1	0.248233	-0.296948	0.145	0.213	1
Supt16	0.248284	-0.40956	0.339	0.393	1
Tmed3	0.248883	0.341235	0.645	0.59	1
Snrk	0.249095	-0.336661	0.274	0.344	1
Fbn1	0.249489	-0.470047	0.726	0.787	1
Cdc42ep3	0.251862	-0.293738	0.274	0.361	1
Angptl2	0.25317	-0.288699	0.29	0.377	1
Srgn	0.253182	-0.274919	0.581	0.656	1
Cdon	0.253525	-0.297382	0.355	0.426	1
Mindy2	0.253598	0.254164	0.419	0.295	1
Map4k4	0.254969	-0.264723	0.339	0.41	1
Fam117b	0.255139	-0.277902	0.097	0.164	1
Syne1	0.256501	0.404127	0.468	0.344	1
Snx10	0.257162	-0.267643	0.194	0.262	1
Thy1	0.257464	-0.326713	0.452	0.508	1
Flna	0.257741	-0.313469	0.516	0.59	1
Stim1	0.258655	-0.27488	0.258	0.328	1
Nipsnap2	0.258771	-0.250377	0.097	0.164	1
Erlec1	0.259096	0.30429	0.339	0.262	1
Tpm4	0.259727	-0.289166	0.581	0.656	1
Poldip2	0.261132	0.289813	0.145	0.082	1
Enah	0.261697	-0.330213	0.161	0.23	1
Fam49b	0.261737	-0.33874	0.323	0.41	1
Hs2st1	0.261896	-0.288781	0.129	0.197	1
Ahnak2	0.263291	-0.532417	0.516	0.475	1
Impact	0.264082	-0.299435	0.145	0.213	1
Trp53inp1	0.264382	-0.389641	0.177	0.246	1
Krtdap	0.264751	0.369283	0.387	0.262	1
Tmem189	0.264873	0.323866	0.177	0.115	1
Man2a1	0.265036	-0.411438	0.403	0.459	1
Tsc22d1	0.266699	0.863613	0.323	0.262	1
Fam32a	0.267097	-0.326597	0.435	0.459	1
Maged1	0.267444	0.338081	0.468	0.393	1
Prpf39	0.26865	-0.253208	0.129	0.197	1
1700019D03Rik	0.269188	-0.32119	0.226	0.295	1
Ssr1	0.270401	-0.465447	0.435	0.475	1
Dpy19l1	0.270496	-0.3492	0.177	0.246	1
Smc3	0.27093	-0.388878	0.419	0.459	1
Prss23	0.271714	-0.376891	0.726	0.82	1
Rabgap1l	0.271907	-0.253481	0.194	0.262	1
Gigyf1	0.27204	-0.304715	0.226	0.295	1
Dlc1	0.272373	-0.340038	0.21	0.279	1
Rpn1	0.272389	-0.360024	0.5	0.525	1
Ywhah	0.2724	0.251382	0.468	0.361	1
Zfyve21	0.274332	0.270096	0.226	0.164	1
Ap3m1	0.27562	-0.270434	0.097	0.148	1
Fam214a	0.276446	-0.308375	0.065	0.115	1
Arhgap10	0.27676	-0.36035	0.29	0.344	1
Tle3	0.277463	-0.36685	0.194	0.246	1
Tulp4	0.280424	-0.35833	0.306	0.361	1
Slc50a1	0.280692	0.448995	0.355	0.295	1
Crtap	0.281269	0.301098	0.274	0.213	1
Uqcrc1	0.282208	0.25558	0.355	0.279	1
Fcho2	0.282208	-0.275385	0.29	0.344	1
Steap4	0.282909	-0.270867	0.113	0.18	1
Ascc3	0.283084	-0.314986	0.226	0.311	1
Exoc3	0.283298	0.257276	0.339	0.246	1
Tmem208	0.28336	0.319215	0.435	0.344	1
Abcd2	0.284005	-0.348313	0.145	0.213	1
St13	0.284337	-0.475398	0.613	0.541	1
Plaur	0.28454	0.360152	0.306	0.23	1
Rela	0.285833	0.277055	0.274	0.197	1
Pds5b	0.286131	-0.340018	0.258	0.328	1
Lpp	0.286148	-0.360534	0.387	0.459	1
Pak2	0.286512	-0.294182	0.581	0.607	1
Ston2	0.287378	-0.250288	0.161	0.23	1
Spi1	0.288113	-0.378045	0.306	0.377	1
Fat4	0.289369	0.280324	0.145	0.082	1
Riok2	0.290201	-0.264284	0.065	0.115	1
Pax5	0.290352	-0.295096	0.113	0.18	1
Trem1	0.292015	0.35095	0.274	0.197	1
Vcam1	0.292698	-0.681294	0.081	0.131	1
Psmb3	0.292746	0.321357	0.629	0.508	1
Arfgef2	0.294887	-0.255173	0.065	0.115	1
Auts2	0.296153	0.53212	0.29	0.213	1
Snx9	0.296973	-0.284733	0.242	0.311	1
Ncam1	0.297057	-0.327746	0.161	0.098	1
Stat1	0.297272	-0.651476	0.306	0.344	1
Dnajc10	0.297704	-0.307609	0.435	0.475	1
Limch1	0.297839	-0.539616	0.145	0.213	1
Gdf10	0.297839	0.456506	0.21	0.148	1
Ppp1cb	0.298629	-0.278091	0.339	0.41	1
Col6a6	0.299518	-0.353162	0.161	0.213	1
Ubr2	0.299846	-0.305278	0.323	0.377	1
Dpm2	0.299881	0.384416	0.258	0.197	1
Cwc25	0.299881	-0.575778	0.194	0.262	1
Eef2	0.301001	-0.303484	0.839	0.738	1
Fbl	0.301761	0.272807	0.177	0.115	1
Xpa	0.302328	0.260079	0.29	0.213	1
Aph1a	0.302784	0.27745	0.274	0.213	1
Glul	0.303614	0.396885	0.516	0.443	1
Dnajc8	0.303735	0.275337	0.484	0.393	1
Hspd1	0.30429	-0.277279	0.419	0.525	1
Myo10	0.305629	0.294386	0.177	0.115	1
Kmt2a	0.306825	-0.48332	0.371	0.377	1
Adpgk	0.308589	0.313327	0.29	0.213	1
Trib1	0.309604	-0.265338	0.29	0.377	1
Rap2c	0.309619	-0.318494	0.194	0.262	1
Galnt1	0.309651	-0.313006	0.387	0.459	1
Mef2a	0.310023	0.281557	0.419	0.377	1
Cfap36	0.310322	-0.323487	0.177	0.23	1
Arnt	0.310324	-0.426266	0.177	0.23	1
Prkrip1	0.310438	-0.268369	0.081	0.131	1
Tnxb	0.310554	-0.2895	0.597	0.672	1
Dpysl3	0.310641	-0.335995	0.323	0.41	1
Cd9	0.310859	0.259596	0.823	0.77	1
Itpr3	0.311672	-0.391343	0.113	0.164	1
Elp1	0.312441	-0.250066	0.097	0.148	1
Macf1	0.312579	-0.483577	0.565	0.541	1
Smc1a	0.312702	-0.320615	0.371	0.443	1
Tnfaip6	0.31396	-0.342384	0.355	0.246	1
Hspa12a	0.314134	-0.255095	0.065	0.115	1
Sbno2	0.317237	-0.279181	0.177	0.23	1
Sgcb	0.31727	0.349769	0.129	0.082	1
Cdc5l	0.320037	-0.342911	0.258	0.311	1
Ech1	0.320148	0.313691	0.403	0.311	1
Slit2	0.320547	-0.557445	0.129	0.18	1
Ppp2r2a	0.320811	0.264692	0.419	0.328	1
Sema4c	0.32156	0.275934	0.113	0.066	1
Bnc2	0.321878	0.367944	0.129	0.082	1
Hdac3	0.323114	0.256586	0.21	0.148	1
Arhgap29	0.323244	-0.393347	0.403	0.443	1
1600012H06Rik	0.323299	-0.306329	0.145	0.197	1
Ndrg3	0.323924	-0.364924	0.113	0.164	1
Gabbr1	0.324199	-0.356229	0.081	0.131	1
Zfp521	0.324199	-0.253074	0.081	0.131	1
Nktr	0.325416	-0.265315	0.565	0.557	1
Maf	0.32545	-0.647604	0.581	0.525	1
Omd	0.326007	-0.384398	0.161	0.098	1
Gpx3	0.328806	0.901025	0.548	0.475	1
Fam129c	0.328873	-0.311894	0.081	0.131	1
Cxcl14	0.328873	-0.722316	0.081	0.131	1
Stxbp3	0.329711	0.28136	0.258	0.197	1
Tcea1	0.330361	-0.353743	0.5	0.541	1
Lrch4	0.331779	-0.252542	0.161	0.213	1
Picalm	0.331917	-0.327037	0.387	0.443	1
Dmxl2	0.332443	-0.310069	0.129	0.18	1
Aox3	0.333591	-0.395382	0.081	0.131	1
Pik3r4	0.333591	-0.26872	0.081	0.131	1
Ubtd2	0.334769	-0.350768	0.145	0.197	1
Il3ra	0.336471	-0.308617	0.129	0.18	1
Tgfbi	0.337675	-0.341142	0.306	0.361	1
Evi5	0.33865	-0.423708	0.145	0.197	1
Epb41l2	0.339837	-0.295068	0.597	0.623	1
Stmn1	0.341919	0.90159	0.113	0.066	1
Nsmce4a	0.342843	0.267081	0.371	0.311	1
Snrnp200	0.343804	0.324282	0.306	0.246	1
Bcl7a	0.346499	-0.419857	0.145	0.197	1
Zfand3	0.346962	-0.277001	0.371	0.41	1
Khdc4	0.347774	-0.297847	0.097	0.148	1
Rbpms	0.347942	-0.395359	0.226	0.279	1
Lcp2	0.348004	-0.28677	0.081	0.131	1
Fkbp11	0.350343	0.354966	0.177	0.115	1
Tnfaip3	0.350466	-0.294134	0.21	0.131	1
Gm26771	0.352401	0.324116	0.113	0.066	1
Mpeg1	0.352895	-0.434343	0.129	0.18	1
Pde7a	0.353714	-0.253741	0.113	0.164	1
Rrbp1	0.353892	-0.301685	0.806	0.787	1
Trir	0.354473	-0.289695	0.565	0.59	1
Sema3c	0.354508	-0.491899	0.613	0.656	1
Ahcyl1	0.354757	-0.308575	0.194	0.246	1
Ntrk2	0.354984	-0.272724	0.161	0.23	1
Fgf2	0.357049	-0.275083	0.177	0.23	1
Sulf2	0.357607	0.313145	0.21	0.148	1
Nfat5	0.35875	-0.250323	0.21	0.262	1
Nifk	0.358788	0.275844	0.242	0.18	1
Ergic1	0.359868	-0.277539	0.258	0.328	1
Sp100	0.364944	-0.27456	0.371	0.41	1
Rbpj	0.365951	-0.326217	0.565	0.557	1
Atp7a	0.366357	-0.262308	0.097	0.148	1
Cxcl13	0.366563	0.615211	0.274	0.213	1
Efhd1	0.367191	-0.452795	0.258	0.295	1
Col1a2	0.369235	0.594296	0.968	0.951	1
Iigp1	0.369601	-0.308957	0.145	0.213	1
Cd44	0.369872	-0.25243	0.387	0.443	1
Jak1	0.371336	-0.348332	0.71	0.705	1
Thbs2	0.372326	0.480558	0.468	0.377	1
Crk	0.373227	-0.300086	0.274	0.311	1
Taok3	0.373271	-0.325816	0.306	0.344	1
Hist2h2ac	0.373483	0.518624	0.145	0.098	1
Nbl1	0.373896	0.394625	0.71	0.623	1
Selplg	0.37405	-0.388242	0.242	0.311	1
Irf1	0.37405	0.6565	0.306	0.246	1
Nbeal1	0.374251	-0.352531	0.242	0.279	1
Nav1	0.374419	-0.343045	0.403	0.426	1
Gnb2	0.375508	-0.271441	0.887	0.852	1
Coro1a	0.377661	-0.3098	0.5	0.574	1
Rbm33	0.377665	-0.374628	0.242	0.262	1
Gnb4	0.378281	0.294976	0.145	0.098	1
Ppp6r1	0.378465	-0.268163	0.129	0.18	1
Zfp945	0.379037	-0.308246	0.145	0.197	1
Gstm2	0.381249	-0.293706	0.242	0.295	1
Slit3	0.382226	-0.346707	0.371	0.393	1
Hmgb2	0.383231	-0.3185	0.581	0.656	1
Srp72	0.383445	-0.281151	0.274	0.311	1
Vps13a	0.387324	0.332266	0.258	0.197	1
Ldb1	0.390353	-0.276314	0.161	0.213	1
Il6st	0.390807	-0.271018	0.516	0.508	1
Tnrc18	0.395101	-0.277592	0.242	0.311	1
Golph3	0.395101	-0.315602	0.258	0.295	1
Plec	0.398387	0.262218	0.5	0.377	1
Rbm39	0.398483	-0.286877	0.839	0.82	1
Col14a1	0.402227	-0.259039	0.726	0.607	1
Jarid2	0.403904	-0.27215	0.113	0.164	1
Rassf3	0.403939	-0.251106	0.194	0.246	1
Magt1	0.405606	-0.330692	0.403	0.426	1
Rab5a	0.407944	-0.328762	0.274	0.311	1
Pgpep1	0.412917	0.282264	0.145	0.098	1
Psmc6	0.413438	0.294773	0.435	0.361	1
Sfrp1	0.415461	-0.295987	0.097	0.148	1
Cxxc5	0.416852	-0.278172	0.258	0.295	1
Zfp260	0.418242	0.297414	0.226	0.18	1
Arhgap9	0.421226	-0.477005	0.194	0.23	1
Sec62	0.421689	-0.251653	0.774	0.787	1
Parp14	0.421872	0.251355	0.242	0.197	1
Lsm14a	0.422448	-0.278121	0.21	0.262	1
Pgrmc1	0.42354	0.336572	0.339	0.279	1
Clec4e	0.426564	0.418737	0.226	0.18	1
Nrip1	0.42689	-0.512565	0.258	0.279	1
[truncated: 209 more rows]

## Sheet: Sup Table 5
Supp Table 5 Periosteum CD90 Young vs Adult	p_val	avg_log2FC	pct.1	pct.2	p_val_adj	Genes
mt-Co3	1.58085e-194	1.21333	1	0.988	5.10376e-190	mt-Co3
mt-Atp6	5.86888e-187	1.16873	1	0.985	1.89477e-182	mt-Atp6
mt-Nd2	1.82819e-155	1.2178	1	0.904	5.9023e-151	mt-Nd2
Col1a2	7.65939e-153	1.23726	1	0.998	2.47284e-148	Col1a2
mt-Nd1	1.06592e-142	1.13675	0.998	0.9	3.44132e-138	mt-Nd1
Tmsb10	3.55782e-138	-1.15719	0.994	0.983	1.14864e-133	Tmsb10
Col3a1	3.28961e-128	1.30898	1	0.989	1.06205e-123	Col3a1
Rps15	3.67194e-124	0.993564	0.996	0.924	1.18549e-119	Rps15
Rps20	1.95206e-120	-0.740936	0.998	0.998	6.30224e-116	Rps20
mt-Nd3	8.42626e-120	1.23289	0.965	0.543	2.72042e-115	mt-Nd3
mt-Co2	3.4734e-113	0.689884	1	0.995	1.12139e-108	mt-Co2
mt-Co1	5.88538e-111	0.654282	1	0.99	1.90009e-106	mt-Co1
Col1a1	1.60782e-107	1.15698	1	0.99	5.19083e-103	Col1a1
Meg3	2.66776e-106	1.44762	0.95	0.56	8.61287e-102	Meg3
S100a6	1.27511e-101	-0.986377	1	0.998	4.11668e-97	S100a6
Nid1	1.24838e-99	1.04928	0.976	0.877	4.03039e-95	Nid1
Rps12	5.75475e-98	0.640801	1	0.989	1.85792e-93	Rps12
Aspn	1.82666e-94	1.19984	0.923	0.462	5.89738e-90	Aspn
Sparc	6.71157e-92	0.778552	1	0.996	2.16683e-87	Sparc
Rpl12	1.30692e-90	0.733998	1	0.947	4.21939e-86	Rpl12
Rpl13a	9.23359e-89	0.641718	0.996	0.955	2.98106e-84	Rpl13a
Tpt1	2.82013e-88	0.53794	1	0.998	9.10479e-84	Tpt1
Rps24	2.35321e-84	-0.621435	1	0.995	7.59734e-80	Rps24
Rpl41	1.07568e-82	-0.635573	1	1	3.47284e-78	Rpl41
Ifi27l2a	2.87576e-82	-1.21503	0.965	0.973	9.28438e-78	Ifi27l2a
Xist	2.18972e-79	1.03739	0.928	0.618	7.0695e-75	Xist
Kcnq1ot1	6.17293e-78	1.15893	0.78	0.309	1.99293e-73	Kcnq1ot1
Selenow	1.69689e-77	-0.840265	0.983	0.959	5.47841e-73	Selenow
Dcn	8.52323e-77	0.46761	1	0.999	2.75172e-72	Dcn
Vim	1.78874e-76	-0.882159	0.993	0.983	5.77496e-72	Vim
Rps25	8.12305e-76	0.666228	0.996	0.937	2.62253e-71	Rps25
mt-Nd4	1.21712e-74	0.653617	0.998	0.948	3.92946e-70	mt-Nd4
Ogn	1.30424e-72	0.869726	0.989	0.873	4.21073e-68	Ogn
Tmsb4x	9.40361e-72	-0.700877	0.996	0.998	3.03596e-67	Tmsb4x
S100a10	6.11793e-71	-0.98914	0.993	0.978	1.97517e-66	S100a10
Gpc3	1.18348e-69	0.891615	0.974	0.716	3.82087e-65	Gpc3
Laptm4a	6.62544e-69	0.696327	0.991	0.811	2.13902e-64	Laptm4a
Gm26771	1.10884e-68	0.870987	0.4	0.059	3.5799e-64	Gm26771
Mrgprg	1.86483e-67	-2.22777	0.103	0.527	6.0206e-63	Mrgprg
Rpl37a	2.11034e-67	-0.560089	1	0.999	6.81323e-63	Rpl37a
Plpp3	3.29202e-66	0.859957	0.989	0.958	1.06283e-61	Plpp3
Crip1	1.53715e-63	-0.979947	0.98	0.973	4.9627e-59	Crip1
Cpz	7.19452e-63	0.600421	0.31	0.029	2.32275e-58	Cpz
Man1a	3.03872e-62	0.796825	0.969	0.761	9.81051e-58	Man1a
Mir99ahg	4.05696e-62	0.778981	0.594	0.182	1.30979e-57	Mir99ahg
Col5a2	5.31655e-62	0.745196	0.967	0.76	1.71645e-57	Col5a2
Peg3	1.54648e-61	0.977641	0.514	0.133	4.99281e-57	Peg3
Rpl23a	5.95741e-60	0.611893	0.993	0.909	1.92335e-55	Rpl23a
Rps13	1.56241e-59	-0.540044	0.998	0.982	5.04423e-55	Rps13
Npc2	1.52245e-58	-0.919353	0.912	0.903	4.91523e-54	Npc2
Malat1	2.54372e-58	0.906662	1	0.88	8.21242e-54	Malat1
Hbb-bs	3.11341e-58	2.02347	0.594	0.18	1.00516e-53	Hbb-bs
Pcolce2	3.16159e-58	0.749598	0.945	0.835	1.02072e-53	Pcolce2
Plagl1	1.36896e-57	0.593796	0.4	0.076	4.41969e-53	Plagl1
Rian	1.377e-57	0.789633	0.675	0.257	4.44564e-53	Rian
Rps2	4.37084e-57	-0.577239	1	0.984	1.41113e-52	Rps2
Daglb	7.12967e-57	-1.68785	0.461	0.686	2.30182e-52	Daglb
Sfrp2	1.52829e-56	0.874056	0.916	0.605	4.93408e-52	Sfrp2
Rpl35a	3.2265e-56	-0.478239	1	0.995	1.04167e-51	Rpl35a
Neo1	4.26936e-55	0.653201	0.606	0.203	1.37836e-50	Neo1
Col6a5	8.39369e-54	-1.70321	0.05	0.406	2.7099e-49	Col6a5
Rpl11	4.31998e-53	-0.498959	0.996	0.978	1.39471e-48	Rpl11
Lama2	5.77441e-53	0.760923	0.806	0.417	1.86427e-48	Lama2
Slc38a4	3.56472e-52	0.512103	0.332	0.052	1.15087e-47	Slc38a4
Rps21	2.07282e-51	0.400602	1	0.991	6.6921e-47	Rps21
Rpl30	3.00046e-51	-0.459922	0.998	0.995	9.68699e-47	Rpl30
Rpl19	4.55935e-51	-0.468997	0.998	0.983	1.47199e-46	Rpl19
Calr	7.99267e-51	0.671361	0.967	0.786	2.58043e-46	Calr
Ccnd2	9.15178e-51	0.766919	0.583	0.215	2.95465e-46	Ccnd2
Igf1	1.18058e-50	1.1615	0.65	0.255	3.81152e-46	Igf1
Adam33	2.8926e-50	0.686969	0.569	0.199	9.33876e-46	Adam33
Anxa2	3.21223e-50	-0.852923	0.947	0.935	1.03707e-45	Anxa2
Zbtb20	3.43306e-50	0.619205	0.987	0.904	1.10836e-45	Zbtb20
mt-Cytb	7.92903e-50	0.456204	1	0.973	2.55989e-45	mt-Cytb
Rpl18	1.00128e-49	-0.50552	0.998	0.978	3.23264e-45	Rpl18
Klf9	1.64339e-49	0.721842	0.835	0.451	5.30568e-45	Klf9
Serping1	2.80983e-47	0.575454	0.996	0.89	9.07153e-43	Serping1
S100a13	3.49861e-47	-0.643652	0.963	0.939	1.12953e-42	S100a13
Rpsa	2.86252e-46	-0.482687	1	0.992	9.24165e-42	Rpsa
Rpl9	7.90154e-46	-0.462436	0.998	0.981	2.55101e-41	Rpl9
Fn1	8.32513e-46	-0.980681	0.978	0.957	2.68777e-41	Fn1
mt-Nd5	2.28319e-45	0.629356	0.855	0.507	7.37127e-41	mt-Nd5
Pcsk6	2.93046e-45	0.813762	0.833	0.557	9.46099e-41	Pcsk6
Rps19	2.02704e-44	-0.473614	0.998	0.985	6.54429e-40	Rps19
Rpl5	4.4169e-44	0.489163	0.987	0.919	1.426e-39	Rpl5
Ccdc80	6.30134e-44	0.688294	0.817	0.466	2.03439e-39	Ccdc80
Ogt	3.15966e-43	0.579645	0.615	0.244	1.02009e-38	Ogt
Nova1	3.16791e-43	0.727828	0.717	0.366	1.02276e-38	Nova1
Rps7	4.60497e-43	-0.467499	1	0.987	1.48672e-38	Rps7
Nme2	5.05744e-43	-0.610395	0.991	0.94	1.6328e-38	Nme2
Sem1	1.69434e-42	-0.635741	0.936	0.925	5.47017e-38	Sem1
Rps5	2.0905e-42	-0.48808	1	0.98	6.74918e-38	Rps5
Serf2	2.46958e-42	-0.526803	0.994	0.978	7.97304e-38	Serf2
Hba-a2	5.30865e-42	1.19137	0.242	0.031	1.7139e-37	Hba-a2
Rbms3	5.331e-42	0.624911	0.769	0.401	1.72111e-37	Rbms3
S100a11	1.76858e-41	-0.608882	0.983	0.972	5.70987e-37	S100a11
Pnisr	3.72465e-41	0.548649	0.6	0.238	1.2025e-36	Pnisr
Nrk	5.11107e-41	0.532419	0.29	0.054	1.65011e-36	Nrk
Zfhx4	9.32323e-41	0.60389	0.892	0.573	3.01001e-36	Zfhx4
Hba-a1	1.21354e-40	1.33932	0.275	0.047	3.91791e-36	Hba-a1
Rps10	1.95961e-40	-0.396423	1	0.993	6.3266e-36	Rps10
Rps27a	4.70755e-40	-0.37017	1	0.994	1.51983e-35	Rps27a
Gm10115	6.14378e-40	0.511849	0.387	0.108	1.98352e-35	Gm10115
Celf2	8.66206e-40	0.601145	0.866	0.554	2.79655e-35	Celf2
Apod	9.71413e-40	0.975441	0.783	0.411	3.13621e-35	Apod
Ctsl	2.0952e-39	0.511827	0.991	0.834	6.76434e-35	Ctsl
Fus	3.14809e-39	0.547914	0.868	0.531	1.01636e-34	Fus
Rps15a	3.74578e-39	-0.402573	1	0.989	1.20932e-34	Rps15a
Tek	1.25463e-38	0.586646	0.694	0.331	4.05056e-34	Tek
Rspo3	3.76627e-38	0.635273	0.47	0.165	1.21594e-33	Rspo3
Ebf1	1.87147e-37	0.51996	0.991	0.913	6.04204e-33	Ebf1
Plac8	2.83274e-37	-1.43854	0.308	0.573	9.1455e-33	Plac8
Nktr	1.23243e-36	0.547835	0.703	0.342	3.97891e-32	Nktr
Pid1	2.0538e-36	0.598807	0.47	0.175	6.63069e-32	Pid1
Rsrp1	2.08514e-36	0.547959	0.844	0.508	6.73186e-32	Rsrp1
Rpl18a	1.04773e-35	-0.438045	0.998	0.987	3.3826e-31	Rpl18a
C3	1.35672e-35	-0.734522	0.895	0.921	4.38016e-31	C3
Rplp0	3.03237e-35	-0.482119	1	0.986	9.79002e-31	Rplp0
Mir100hg	3.08363e-35	0.577876	0.565	0.242	9.95548e-31	Mir100hg
Bmp3	5.64183e-35	0.64951	0.637	0.31	1.82146e-30	Bmp3
Adamts2	7.53712e-35	0.580289	0.866	0.554	2.43336e-30	Adamts2
Gstm1	2.16196e-34	0.555369	0.945	0.692	6.97988e-30	Gstm1
Rps14	3.80989e-34	0.31156	0.998	0.991	1.23002e-29	Rps14
Lamc1	4.73454e-34	0.544808	0.897	0.613	1.52855e-29	Lamc1
Dpp4	8.5942e-34	0.560386	0.932	0.793	2.77464e-29	Dpp4
Scn7a	8.89946e-34	0.590904	0.639	0.306	2.87319e-29	Scn7a
Antxr2	2.88689e-33	0.558923	0.846	0.541	9.32033e-29	Antxr2
Aebp1	5.39239e-33	0.592281	0.93	0.728	1.74093e-28	Aebp1
Apbb2	5.59028e-33	0.5366	0.778	0.458	1.80482e-28	Apbb2
Rpl15	6.06493e-33	-0.454845	0.996	0.963	1.95806e-28	Rpl15
Itgbl1	7.17455e-33	0.463492	0.312	0.081	2.3163e-28	Itgbl1
Itm2a	3.00064e-32	0.456059	0.767	0.395	9.68756e-28	Itm2a
Mmp2	4.2707e-32	0.501233	0.989	0.896	1.3788e-27	Mmp2
Lamp2	8.51736e-32	0.521088	0.912	0.67	2.74983e-27	Lamp2
Efna5	1.11123e-31	0.4485	0.484	0.185	3.5876e-27	Efna5
Adcy7	6.58534e-31	0.296805	0.229	0.044	2.12608e-26	Adcy7
Antxr1	8.7598e-31	0.47454	0.927	0.694	2.8281e-26	Antxr1
Tcf7l2	1.26175e-30	0.475542	0.602	0.278	4.07357e-26	Tcf7l2
Gap43	9.18863e-30	0.525132	0.532	0.236	2.96655e-25	Gap43
Ddx5	2.33694e-29	0.484254	0.963	0.764	7.54481e-25	Ddx5
Hbb-bt	2.54769e-29	0.803028	0.24	0.052	8.22523e-25	Hbb-bt
Foxp2	2.59144e-29	0.447387	0.45	0.174	8.36646e-25	Foxp2
Ace	2.73535e-29	0.524353	0.765	0.441	8.83108e-25	Ace
Spock3	2.82586e-29	0.374673	0.24	0.054	9.12328e-25	Spock3
Ddr2	3.37263e-29	0.535441	0.958	0.79	1.08885e-24	Ddr2
Rps3a1	3.56815e-29	-0.352114	1	0.988	1.15198e-24	Rps3a1
Luc7l2	3.82485e-29	0.466628	0.829	0.512	1.23485e-24	Luc7l2
Zfp871	4.10103e-29	0.389541	0.501	0.202	1.32402e-24	Zfp871
Btf3	4.80744e-29	-0.514452	0.928	0.89	1.55208e-24	Btf3
Clec3b	6.69308e-29	0.38523	0.974	0.95	2.16086e-24	Clec3b
Tmeff2	8.23451e-29	0.520667	0.727	0.421	2.65851e-24	Tmeff2
Bst2	8.6096e-29	-0.840274	0.694	0.75	2.77961e-24	Bst2
Abca9	8.88643e-29	0.466145	0.582	0.271	2.86898e-24	Abca9
Atp5g2	1.14777e-28	-0.629545	0.785	0.794	3.70558e-24	Atp5g2
Ddx3x	1.46513e-28	0.510539	0.839	0.529	4.73018e-24	Ddx3x
Neat1	1.91796e-28	0.754898	0.802	0.524	6.19213e-24	Neat1
Rbm25	1.97111e-28	0.42909	0.587	0.273	6.36373e-24	Rbm25
Mat2a	2.16154e-28	0.614766	0.743	0.448	6.97853e-24	Mat2a
Ablim1	2.6245e-28	0.522737	0.862	0.651	8.47319e-24	Ablim1
Arrdc3	3.59144e-28	0.448771	0.411	0.155	1.1595e-23	Arrdc3
Col14a1	4.5569e-28	0.452556	0.972	0.873	1.4712e-23	Col14a1
Akap12	8.93164e-28	0.518305	0.846	0.593	2.88358e-23	Akap12
Rps17	1.63831e-27	0.380757	0.994	0.914	5.28928e-23	Rps17
Serinc1	2.14721e-27	0.469462	0.831	0.527	6.93226e-23	Serinc1
Cebpd	2.29766e-27	0.681784	0.73	0.426	7.418e-23	Cebpd
Rpl22l1	2.29992e-27	-0.55604	0.927	0.918	7.42528e-23	Rpl22l1
Copa	2.44716e-27	0.421396	0.741	0.414	7.90065e-23	Copa
Eif4a2	3.44849e-27	0.411668	0.727	0.385	1.11334e-22	Eif4a2
Lpar1	3.68798e-27	0.41824	0.697	0.371	1.19067e-22	Lpar1
Nenf	4.4022e-27	-0.499795	0.928	0.869	1.42125e-22	Nenf
Clk1	4.67018e-27	0.426026	0.528	0.236	1.50777e-22	Clk1
Tra2a	6.90846e-27	0.455686	0.563	0.267	2.2304e-22	Tra2a
Gng5	7.75275e-27	-0.49048	0.956	0.895	2.50298e-22	Gng5
Cd34	1.07636e-26	-0.450584	0.967	0.965	3.47503e-22	Cd34
Adamtsl1	1.16848e-26	0.499898	0.69	0.388	3.77244e-22	Adamtsl1
Ppia	2.1456e-26	-0.456628	0.994	0.935	6.92707e-22	Ppia
Ahnak	2.47716e-26	-0.458084	1	1	7.9975e-22	Ahnak
Wnt5a	5.35833e-26	0.432776	0.503	0.225	1.72994e-21	Wnt5a
Ttc14	5.80866e-26	0.409955	0.49	0.217	1.87533e-21	Ttc14
Arglu1	7.00861e-26	0.437688	0.58	0.287	2.26273e-21	Arglu1
Rpl22	1.08152e-25	-0.362565	1	0.981	3.4917e-21	Rpl22
Phip	1.1187e-25	0.50874	0.536	0.26	3.61173e-21	Phip
Rpl10a	1.13059e-25	-0.415779	0.998	0.961	3.6501e-21	Rpl10a
Atp5l	1.14565e-25	-0.490735	0.928	0.895	3.69874e-21	Atp5l
Cd164	1.21823e-25	0.404243	0.837	0.524	3.93305e-21	Cd164
Dlc1	1.68197e-25	0.426746	0.624	0.313	5.43024e-21	Dlc1
Fbxl7	1.88267e-25	0.310328	0.264	0.073	6.07819e-21	Fbxl7
Zcchc7	1.91568e-25	0.384953	0.409	0.162	6.18476e-21	Zcchc7
Cp	2.0141e-25	0.415568	0.262	0.074	6.50252e-21	Cp
Gfpt2	2.5057e-25	0.523669	0.754	0.489	8.08967e-21	Gfpt2
Mbnl2	3.48522e-25	0.377489	0.697	0.36	1.1252e-20	Mbnl2
Pcdh9	4.35171e-25	0.363384	0.317	0.105	1.40495e-20	Pcdh9
Pik3r1	4.8053e-25	0.549378	0.719	0.415	1.55139e-20	Pik3r1
Sema3c	4.89654e-25	0.505204	0.949	0.865	1.58085e-20	Sema3c
Atp2b1	5.6787e-25	0.469897	0.839	0.564	1.83337e-20	Atp2b1
Naca	5.84383e-25	-0.427528	0.972	0.936	1.88668e-20	Naca
Rpl34	6.59606e-25	-0.316112	1	0.988	2.12954e-20	Rpl34
Rpl36	8.55119e-25	-0.344937	1	0.982	2.76075e-20	Rpl36
Tgfbr3	9.61897e-25	0.404317	0.84	0.544	3.10549e-20	Tgfbr3
Gngt2	9.67985e-25	-0.756121	0.521	0.645	3.12514e-20	Gngt2
Sdc2	9.75992e-25	0.399331	0.703	0.382	3.15099e-20	Sdc2
Ubn2	1.2083e-24	0.345374	0.402	0.16	3.90098e-20	Ubn2
Jmjd1c	1.46893e-24	0.405891	0.53	0.247	4.74244e-20	Jmjd1c
Abca8b	1.82361e-24	0.333463	0.25	0.069	5.88752e-20	Abca8b
Atp5e	2.06821e-24	-0.425834	0.983	0.942	6.67722e-20	Atp5e
Maf	2.16987e-24	0.481243	0.884	0.637	7.00542e-20	Maf
Fubp1	2.57919e-24	0.372764	0.453	0.194	8.32691e-20	Fubp1
Marcks	2.61876e-24	0.30223	1	0.988	8.45466e-20	Marcks
Thoc2	2.98932e-24	0.403115	0.499	0.234	9.65102e-20	Thoc2
Bmpr1a	4.29362e-24	0.319204	0.525	0.24	1.3862e-19	Bmpr1a
Efemp1	4.38842e-24	0.424292	0.923	0.875	1.4168e-19	Efemp1
Coq10b	4.80395e-24	0.333241	0.312	0.105	1.55095e-19	Coq10b
Vldlr	5.95569e-24	0.436229	0.565	0.284	1.9228e-19	Vldlr
Lpl	6.02849e-24	0.647817	0.796	0.506	1.9463e-19	Lpl
Cox7c	8.76492e-24	-0.480623	0.921	0.895	2.82975e-19	Cox7c
Cpsf6	1.03185e-23	0.351102	0.404	0.161	3.33133e-19	Cpsf6
Zfhx3	1.17317e-23	0.467269	0.818	0.546	3.78758e-19	Zfhx3
Isg15	1.17838e-23	-1.157	0.211	0.428	3.8044e-19	Isg15
S1pr3	1.67247e-23	-0.555537	0.013	0.188	5.39959e-19	S1pr3
Rictor	1.80181e-23	0.303465	0.339	0.12	5.81714e-19	Rictor
Filip1l	2.55472e-23	0.358612	0.497	0.231	8.2479e-19	Filip1l
Sh3bgrl3	2.61752e-23	-0.767469	0.554	0.637	8.45068e-19	Sh3bgrl3
Lum	2.8807e-23	0.387093	0.989	0.944	9.30035e-19	Lum
Rack1	3.02149e-23	0.294234	0.996	0.956	9.75487e-19	Rack1
Nr1d2	3.14544e-23	0.2845	0.182	0.037	1.0155e-18	Nr1d2
Nbeal1	3.31838e-23	0.420447	0.55	0.267	1.07134e-18	Nbeal1
Mast4	4.03192e-23	0.350733	0.424	0.18	1.30171e-18	Mast4
Tmem59	5.20376e-23	0.38986	0.802	0.5	1.68003e-18	Tmem59
Abcc9	5.83343e-23	0.32917	0.222	0.058	1.88332e-18	Abcc9
Ptx3	6.5261e-23	-1.21097	0.233	0.43	2.10695e-18	Ptx3
Igf1r	9.30207e-23	0.383511	0.615	0.329	3.00317e-18	Igf1r
Matr3	1.38274e-22	0.370673	0.572	0.293	4.46416e-18	Matr3
Nfia	1.5626e-22	0.354097	0.851	0.58	5.04484e-18	Nfia
Rrbp1	2.44216e-22	0.402452	0.967	0.809	7.8845e-18	Rrbp1
Lgals1	3.28439e-22	-0.546731	0.991	0.953	1.06037e-17	Lgals1
Ski	3.79576e-22	0.377989	0.741	0.441	1.22546e-17	Ski
Rpl39	4.08479e-22	-0.31161	1	0.995	1.31877e-17	Rpl39
B830012L14Rik	4.7028e-22	0.261286	0.147	0.025	1.5183e-17	B830012L14Rik
Ar	4.76141e-22	0.481612	0.93	0.818	1.53722e-17	Ar
Rhoj	5.5023e-22	0.428751	0.822	0.538	1.77642e-17	Rhoj
Tmem165	5.57238e-22	0.310096	0.428	0.184	1.79904e-17	Tmem165
C430049B03Rik	5.61003e-22	0.486392	0.292	0.102	1.8112e-17	C430049B03Rik
Oat	5.84399e-22	0.401367	0.851	0.542	1.88673e-17	Oat
Itm2b	6.11438e-22	0.276272	0.994	0.943	1.97403e-17	Itm2b
Bmp7	6.60923e-22	0.332797	0.371	0.146	2.13379e-17	Bmp7
Hsp90b1	6.6946e-22	0.377973	0.993	0.899	2.16135e-17	Hsp90b1
Pbrm1	7.05001e-22	0.366066	0.782	0.482	2.2761e-17	Pbrm1
Calm1	1.07905e-21	-0.468634	0.972	0.92	3.48371e-17	Calm1
Setd7	1.09538e-21	0.32509	0.494	0.229	3.53642e-17	Setd7
Cdon	1.1193e-21	0.396215	0.626	0.341	3.61366e-17	Cdon
Ccn3	1.4134e-21	-0.868619	0.681	0.731	4.56317e-17	Ccn3
Tm7sf3	1.57029e-21	0.305477	0.402	0.169	5.06968e-17	Tm7sf3
Hint1	1.59503e-21	-0.485727	0.895	0.836	5.14954e-17	Hint1
Col4a5	1.65186e-21	0.295979	0.229	0.066	5.33303e-17	Col4a5
Sec62	2.02497e-21	0.413268	0.91	0.689	6.53761e-17	Sec62
Loxl1	2.33797e-21	0.374035	0.947	0.791	7.54814e-17	Loxl1
Mbtps1	2.80096e-21	0.364962	0.516	0.256	9.04289e-17	Mbtps1
Edf1	2.95494e-21	-0.55435	0.771	0.757	9.54002e-17	Edf1
Emsy	2.95772e-21	0.266129	0.29	0.099	9.549e-17	Emsy
Mfap2	3.90617e-21	0.462884	0.662	0.38	1.26111e-16	Mfap2
Zfr	4.26649e-21	0.35118	0.457	0.212	1.37744e-16	Zfr
Oaz1	5.17469e-21	-0.374273	0.978	0.941	1.67065e-16	Oaz1
Txn1	6.0209e-21	-0.755127	0.925	0.857	1.94385e-16	Txn1
Prkg2	6.59507e-21	0.407431	0.497	0.249	2.12922e-16	Prkg2
Myl6	7.54358e-21	-0.387601	0.989	0.966	2.43545e-16	Myl6
Fndc3b	8.16889e-21	0.359072	0.754	0.479	2.63733e-16	Fndc3b
Lpar4	8.78215e-21	0.341009	0.444	0.204	2.83532e-16	Lpar4
Dmkn	9.38421e-21	-1.05641	0.206	0.405	3.02969e-16	Dmkn
Kmt2c	1.01973e-20	0.298083	0.495	0.232	3.29221e-16	Kmt2c
Zkscan3	1.18323e-20	0.268132	0.328	0.123	3.82007e-16	Zkscan3
Srsf2	1.24596e-20	0.33933	0.611	0.327	4.02259e-16	Srsf2
Rpl35	1.64846e-20	-0.412124	0.967	0.944	5.32206e-16	Rpl35
Crispld1	1.9594e-20	0.341514	0.38	0.16	6.32593e-16	Crispld1
Pam	2.07178e-20	0.365325	0.826	0.549	6.68875e-16	Pam
Cavin3	2.18289e-20	-0.563723	0.939	0.882	7.04745e-16	Cavin3
Reck	2.22499e-20	0.392399	0.593	0.318	7.18339e-16	Reck
Foxo1	2.45478e-20	0.29647	0.466	0.215	7.92526e-16	Foxo1
Twsg1	2.72103e-20	0.383572	0.721	0.436	8.78485e-16	Twsg1
Rpl37	3.21269e-20	-0.294647	0.998	0.993	1.03722e-15	Rpl37
Txndc17	3.5435e-20	-0.502218	0.785	0.778	1.14402e-15	Txndc17
Prpf38b	3.80401e-20	0.296266	0.343	0.137	1.22812e-15	Prpf38b
Ino80d	3.94726e-20	0.28061	0.367	0.15	1.27437e-15	Ino80d
Rps26	5.35521e-20	-0.310272	1	0.995	1.72893e-15	Rps26
Rsrc2	7.55617e-20	0.34539	0.536	0.272	2.43951e-15	Rsrc2
Lama4	7.78512e-20	0.413842	0.772	0.501	2.51343e-15	Lama4
Pten	8.23932e-20	0.332908	0.536	0.272	2.66007e-15	Pten
Omd	8.36142e-20	0.250445	0.228	0.069	2.69948e-15	Omd
Krit1	9.03002e-20	0.325091	0.433	0.199	2.91534e-15	Krit1
Atrx	9.03366e-20	0.383129	0.725	0.449	2.91652e-15	Atrx
Cpxm1	9.66895e-20	0.511216	0.679	0.431	3.12162e-15	Cpxm1
Mga	9.91702e-20	0.278016	0.506	0.243	3.20171e-15	Mga
Nrip1	1.04493e-19	0.317688	0.51	0.256	3.37354e-15	Nrip1
Mkln1	1.14336e-19	0.325212	0.459	0.221	3.69133e-15	Mkln1
Creb5	1.14451e-19	0.410666	0.853	0.655	3.69505e-15	Creb5
4632427E13Rik	1.55201e-19	0.294658	0.215	0.066	5.01068e-15	4632427E13Rik
Setd5	1.60459e-19	0.286389	0.453	0.211	5.18042e-15	Setd5
Rorb	2.08622e-19	0.353713	0.457	0.218	6.73536e-15	Rorb
Rpn2	2.13644e-19	0.368733	0.793	0.49	6.8975e-15	Rpn2
Uqcrh	2.57702e-19	-0.419726	0.95	0.902	8.3199e-15	Uqcrh
Fnip1	2.87859e-19	0.271225	0.38	0.16	9.29353e-15	Fnip1
Rpl32	3.50846e-19	-0.298245	0.998	0.987	1.13271e-14	Rpl32
Calcrl	3.75407e-19	0.42845	0.71	0.437	1.212e-14	Calcrl
Ptprd	3.7897e-19	0.313562	0.204	0.059	1.22351e-14	Ptprd
Dock11	4.11405e-19	0.256971	0.461	0.218	1.32822e-14	Dock11
Fau	4.12143e-19	-0.274727	0.996	0.99	1.3306e-14	Fau
Rora	4.43601e-19	0.315939	0.481	0.237	1.43216e-14	Rora
Pcmtd1	4.50848e-19	0.302406	0.497	0.244	1.45556e-14	Pcmtd1
Ifitm3	4.97271e-19	-0.551268	0.996	0.944	1.60544e-14	Ifitm3
Rcn3	5.78776e-19	0.400375	0.769	0.49	1.86858e-14	Rcn3
Gpr153	5.94707e-19	0.297194	0.332	0.135	1.92001e-14	Gpr153
Birc6	6.32383e-19	0.324687	0.549	0.29	2.04165e-14	Birc6
Slc38a2	7.5262e-19	0.344716	0.556	0.296	2.42983e-14	Slc38a2
Klhl13	8.12468e-19	0.260666	0.519	0.253	2.62305e-14	Klhl13
Srsf11	8.90936e-19	0.331147	0.648	0.361	2.87639e-14	Srsf11
Aif1l	9.03038e-19	-0.724666	0.532	0.624	2.91546e-14	Aif1l
Arf4	9.98126e-19	0.387898	0.89	0.655	3.22245e-14	Arf4
Snrpg	1.09159e-18	-0.451604	0.912	0.868	3.52421e-14	Snrpg
Zic1	1.0946e-18	0.419768	0.479	0.251	3.5339e-14	Zic1
March7	1.31567e-18	0.270281	0.374	0.161	4.24766e-14	March7
Zfp292	1.51809e-18	0.336419	0.411	0.192	4.90116e-14	Zfp292
Ints6	1.67759e-18	0.252345	0.261	0.091	5.4161e-14	Ints6
Rbm5	1.77385e-18	0.320565	0.514	0.267	5.72687e-14	Rbm5
Sbf2	1.97883e-18	0.261476	0.391	0.174	6.38866e-14	Sbf2
Mef2a	2.05449e-18	0.302231	0.503	0.257	6.63292e-14	Mef2a
Magt1	2.15573e-18	0.369804	0.611	0.35	6.95976e-14	Magt1
Helz	2.31168e-18	0.339005	0.398	0.184	7.46326e-14	Helz
Srrm2	2.35882e-18	0.373101	0.802	0.553	7.61546e-14	Srrm2
Rps11	2.68651e-18	-0.329631	0.998	0.98	8.67341e-14	Rps11
Pcdh19	3.06071e-18	0.319732	0.536	0.288	9.88149e-14	Pcdh19
Rab22a	3.3005e-18	0.255003	0.483	0.235	1.06557e-13	Rab22a
Osbpl1a	3.68487e-18	0.33443	0.451	0.223	1.18966e-13	Osbpl1a
Lrp6	4.13501e-18	0.36232	0.585	0.313	1.33499e-13	Lrp6
Ptn	4.38268e-18	0.487121	0.387	0.179	1.41495e-13	Ptn
Col5a1	5.222e-18	0.33688	0.965	0.821	1.68592e-13	Col5a1
2410006H16Rik	6.10092e-18	-0.709234	0.528	0.607	1.96968e-13	2410006H16Rik
Pura	7.199e-18	0.333418	0.694	0.419	2.3242e-13	Pura
Smpd3	8.51153e-18	-0.672417	0.886	0.854	2.74795e-13	Smpd3
Bfar	8.69671e-18	0.264956	0.358	0.154	2.80773e-13	Bfar
Zdhhc20	9.55149e-18	0.254795	0.406	0.184	3.0837e-13	Zdhhc20
Serpinf1	9.66211e-18	0.348771	0.983	0.87	3.11941e-13	Serpinf1
Zfp638	1.0365e-17	0.340518	0.505	0.262	3.34636e-13	Zfp638
Ttc28	1.08903e-17	0.310883	0.602	0.332	3.51595e-13	Ttc28
Cav1	1.09864e-17	-0.816615	0.117	0.29	3.54694e-13	Cav1
Srek1	1.16368e-17	0.271705	0.361	0.158	3.75696e-13	Srek1
Rpl27	1.20301e-17	-0.278645	0.991	0.965	3.88393e-13	Rpl27
Psd3	1.44412e-17	0.284061	0.462	0.233	4.66233e-13	Psd3
S100a16	1.51406e-17	-0.560208	0.883	0.845	4.88815e-13	S100a16
Ccl7	1.77341e-17	-1.09599	0.25	0.423	5.72545e-13	Ccl7
Tasor	1.82809e-17	0.326387	0.501	0.262	5.90199e-13	Tasor
Hmgb1	1.9291e-17	0.318538	0.941	0.74	6.2281e-13	Hmgb1
Zeb1	1.93244e-17	0.29422	0.596	0.344	6.23887e-13	Zeb1
Gaa	1.95086e-17	0.265475	0.424	0.202	6.29835e-13	Gaa
Lamb1	2.02943e-17	0.351321	0.723	0.46	6.55203e-13	Lamb1
Pcbp2	2.03505e-17	0.312616	0.859	0.61	6.57017e-13	Pcbp2
Plec	2.0641e-17	-0.720024	0.539	0.615	6.66394e-13	Plec
Ccpg1	2.14628e-17	0.251852	0.604	0.328	6.92926e-13	Ccpg1
Nucb2	2.32253e-17	0.292176	0.521	0.274	7.49829e-13	Nucb2
Bclaf1	2.5127e-17	0.326551	0.574	0.321	8.11225e-13	Bclaf1
Zfp950	2.99161e-17	0.267154	0.31	0.126	9.65842e-13	Zfp950
Fbxw8	3.1941e-17	0.252439	0.338	0.142	1.03121e-12	Fbxw8
Gulp1	3.19413e-17	0.292785	0.371	0.17	1.03122e-12	Gulp1
Duox2	3.4608e-17	-0.469215	0.006	0.131	1.11732e-12	Duox2
Srpx	4.11552e-17	0.288898	0.345	0.148	1.3287e-12	Srpx
Cd55	4.86408e-17	-0.731973	0.776	0.759	1.57037e-12	Cd55
Plat	5.06708e-17	0.382541	0.754	0.538	1.63591e-12	Plat
Kif1b	6.79071e-17	0.298132	0.596	0.326	2.19238e-12	Kif1b
Rps6	6.81688e-17	0.27094	0.996	0.94	2.20083e-12	Rps6
Lamb2	7.36342e-17	0.331223	0.839	0.571	2.37728e-12	Lamb2
Itgb7	8.78786e-17	-0.597061	0.046	0.193	2.83716e-12	Itgb7
Pla2g4a	8.99868e-17	0.310475	0.442	0.225	2.90522e-12	Pla2g4a
Fam133b	9.47011e-17	0.25367	0.325	0.139	3.05743e-12	Fam133b
Colec12	1.09353e-16	0.345097	0.554	0.304	3.53046e-12	Colec12
Reep3	1.15062e-16	0.313626	0.85	0.584	3.71477e-12	Reep3
Gsn	1.16312e-16	-0.325975	1	0.998	3.75514e-12	Gsn
Fbln5	1.18672e-16	0.366503	0.635	0.389	3.83132e-12	Fbln5
Stt3a	1.1886e-16	0.256448	0.578	0.323	3.8374e-12	Stt3a
Kmt2e	1.19217e-16	0.312186	0.622	0.364	3.84891e-12	Kmt2e
Ppp1r14b	1.25627e-16	-0.463432	0.938	0.893	4.05587e-12	Ppp1r14b
Opcml	1.55578e-16	0.399351	0.741	0.498	5.02283e-12	Opcml
Scara5	1.59911e-16	0.314926	0.972	0.874	5.16274e-12	Scara5
Megf9	1.63854e-16	0.256461	0.417	0.199	5.29001e-12	Megf9
Golim4	1.66031e-16	0.301499	0.761	0.486	5.3603e-12	Golim4
Tspo	1.81796e-16	-0.740781	0.688	0.689	5.86929e-12	Tspo
Tspan3	2.3459e-16	0.296693	0.6	0.336	7.57375e-12	Tspan3
Fndc1	2.42014e-16	0.348015	0.971	0.864	7.81343e-12	Fndc1
Mrpl52	2.4709e-16	-0.496292	0.842	0.787	7.97731e-12	Mrpl52
Arhgap20	2.66326e-16	0.362184	0.736	0.485	8.59834e-12	Arhgap20
Gnaq	3.16947e-16	0.252659	0.473	0.238	1.02326e-11	Gnaq
Thbd	3.94889e-16	0.368112	0.672	0.409	1.2749e-11	Thbd
Tent5a	4.45449e-16	0.349861	0.446	0.233	1.43813e-11	Tent5a
Abca5	4.64058e-16	0.297136	0.292	0.124	1.49821e-11	Abca5
Stt3b	4.80226e-16	0.30229	0.569	0.316	1.55041e-11	Stt3b
Ccl2	4.93143e-16	-1.31085	0.046	0.19	1.59211e-11	Ccl2
Atp5h	5.49715e-16	-0.402042	0.879	0.85	1.77475e-11	Atp5h
Bmpr2	5.86592e-16	0.281046	0.631	0.374	1.89381e-11	Bmpr2
Thy1	6.17543e-16	-0.615781	0.694	0.723	1.99374e-11	Thy1
Rpl36al	6.52134e-16	-0.336711	0.971	0.913	2.10542e-11	Rpl36al
Aldh1a1	8.69509e-16	0.273743	0.429	0.218	2.80721e-11	Aldh1a1
Meis2	1.11531e-15	0.301935	0.437	0.224	3.60079e-11	Meis2
Rpl24	1.1187e-15	-0.260773	0.998	0.978	3.61173e-11	Rpl24
Tceal8	1.20278e-15	0.316433	0.594	0.34	3.88317e-11	Tceal8
Cox5b	1.27526e-15	-0.491366	0.739	0.718	4.11717e-11	Cox5b
Lvrn	1.28314e-15	0.260087	0.417	0.204	4.14263e-11	Lvrn
Nfat5	1.31847e-15	0.274199	0.473	0.247	4.25667e-11	Nfat5
Klf7	1.32908e-15	0.278293	0.538	0.297	4.29092e-11	Klf7
Htra3	1.39434e-15	-0.574406	0.824	0.815	4.50161e-11	Htra3
Cfh	1.53053e-15	0.258512	0.305	0.132	4.9413e-11	Cfh
Lmbrd1	1.62831e-15	0.259513	0.361	0.167	5.257e-11	Lmbrd1
Tmed9	1.6919e-15	0.309671	0.743	0.478	5.4623e-11	Tmed9
Pbx1	1.80989e-15	0.278558	0.697	0.444	5.84322e-11	Pbx1
Sppl2a	1.85517e-15	0.300212	0.736	0.466	5.98943e-11	Sppl2a
Hnrnpr	1.94517e-15	0.298399	0.56	0.318	6.27998e-11	Hnrnpr
Ccnt2	2.23535e-15	0.250847	0.286	0.12	7.21682e-11	Ccnt2
Fat4	2.51536e-15	0.308327	0.229	0.086	8.12085e-11	Fat4
Dock7	2.57667e-15	0.262803	0.602	0.352	8.31879e-11	Dock7
Lpp	2.64102e-15	0.30696	0.829	0.596	8.52653e-11	Lpp
Gns	2.73283e-15	0.285875	0.591	0.342	8.82293e-11	Gns
App	2.77941e-15	0.264509	0.897	0.686	8.97333e-11	App
Naaladl2	2.79229e-15	0.256637	0.283	0.119	9.0149e-11	Naaladl2
Dock4	2.82224e-15	0.262646	0.325	0.148	9.11162e-11	Dock4
Bptf	3.56216e-15	0.279552	0.574	0.326	1.15004e-10	Bptf
Man2a1	3.63535e-15	0.327476	0.78	0.551	1.17367e-10	Man2a1
Col5a3	3.64071e-15	-0.753161	0.683	0.718	1.1754e-10	Col5a3
Rbm39	3.7682e-15	0.334264	0.828	0.594	1.21656e-10	Rbm39
Arhgap5	4.18818e-15	0.345191	0.602	0.368	1.35215e-10	Arhgap5
Dynll1	4.28807e-15	-0.417775	0.938	0.898	1.3844e-10	Dynll1
Chmp4b	4.35501e-15	0.288413	0.585	0.332	1.40602e-10	Chmp4b
Rpl4	4.47278e-15	0.260766	0.982	0.874	1.44404e-10	Rpl4
Aplp2	4.8018e-15	0.30587	0.804	0.566	1.55026e-10	Aplp2
Eprs	5.02777e-15	0.289143	0.657	0.396	1.62322e-10	Eprs
Hsd11b1	5.16886e-15	-0.627406	0.127	0.281	1.66877e-10	Hsd11b1
Ppic	7.81028e-15	0.307952	0.743	0.482	2.52155e-10	Ppic
Dag1	8.32958e-15	0.262093	0.739	0.481	2.6892e-10	Dag1
Spsb1	8.5211e-15	0.26918	0.385	0.189	2.75104e-10	Spsb1
H2-T23	9.22537e-15	-0.610828	0.275	0.414	2.97841e-10	H2-T23
Top1	9.38677e-15	0.305343	0.604	0.357	3.03052e-10	Top1
Cpne3	9.75052e-15	0.331116	0.539	0.313	3.14796e-10	Cpne3
Arid5b	1.08457e-14	0.265287	0.317	0.145	3.50152e-10	Arid5b
mt-Nd4l	1.09836e-14	0.264136	0.868	0.618	3.54606e-10	mt-Nd4l
Serpina3g	1.3031e-14	-0.391728	0.017	0.133	4.20706e-10	Serpina3g
Rsu1	1.67312e-14	0.263051	0.578	0.331	5.40167e-10	Rsu1
Strn3	1.71202e-14	0.263453	0.583	0.333	5.52727e-10	Strn3
Tceal9	2.03283e-14	0.331377	0.767	0.512	6.56301e-10	Tceal9
Mgst1	2.13817e-14	0.273947	0.872	0.619	6.90308e-10	Mgst1
Csde1	2.39781e-14	0.317052	0.804	0.575	7.74132e-10	Csde1
Hif1a	2.39934e-14	0.260042	0.571	0.326	7.74628e-10	Hif1a
Limch1	2.53015e-14	0.289305	0.534	0.298	8.1686e-10	Limch1
H2-K1	2.53978e-14	-0.55167	0.846	0.802	8.19969e-10	H2-K1
Mrpl33	2.54596e-14	-0.448318	0.828	0.797	8.21962e-10	Mrpl33
Wls	2.58585e-14	0.268869	0.789	0.522	8.34842e-10	Wls
Pkd2	2.84656e-14	0.267166	0.688	0.423	9.19012e-10	Pkd2
Uchl1	2.86667e-14	0.314014	0.539	0.314	9.25503e-10	Uchl1
Asph	2.86839e-14	0.261103	0.563	0.32	9.2606e-10	Asph
Rev3l	3.06114e-14	0.321215	0.398	0.205	9.8829e-10	Rev3l
Wnt2	3.11941e-14	-0.661072	0.563	0.617	1.0071e-09	Wnt2
Sash1	3.2185e-14	0.26202	0.76	0.499	1.03909e-09	Sash1
Ash1l	3.45961e-14	0.325268	0.631	0.387	1.11693e-09	Ash1l
Nbl1	3.63435e-14	-0.55614	0.846	0.805	1.17335e-09	Nbl1
Igf2	4.21406e-14	0.361556	0.134	0.035	1.36051e-09	Igf2
Gls	4.74268e-14	0.254193	0.558	0.313	1.53118e-09	Gls
Il4ra	4.93687e-14	-0.646223	0.398	0.525	1.59387e-09	Il4ra
Mbnl1	5.15285e-14	0.259651	0.872	0.628	1.6636e-09	Mbnl1
Tram1	6.20341e-14	0.294053	0.769	0.523	2.00277e-09	Tram1
Chd9	6.49258e-14	0.254183	0.439	0.233	2.09613e-09	Chd9
Rps4x	6.60158e-14	-0.270163	0.996	0.979	2.13132e-09	Rps4x
Fhl1	7.89843e-14	-0.637284	0.594	0.626	2.55001e-09	Fhl1
Irf7	8.53399e-14	-0.538264	0.105	0.25	2.7552e-09	Irf7
Nfe2l2	9.30113e-14	0.265385	0.756	0.488	3.00287e-09	Nfe2l2
Slc4a10	1.02667e-13	0.291977	0.209	0.081	3.31461e-09	Slc4a10
Tm9sf4	1.11967e-13	0.256644	0.47	0.257	3.61485e-09	Tm9sf4
Cox6b1	1.13347e-13	-0.430056	0.84	0.8	3.6594e-09	Cox6b1
Rps27l	1.19299e-13	-0.457473	0.877	0.829	3.85156e-09	Rps27l
Hspa5	1.26259e-13	0.324015	0.971	0.837	4.07628e-09	Hspa5
Zyx	1.28347e-13	0.254921	0.793	0.547	4.14369e-09	Zyx
Ccdc88a	1.52834e-13	0.289809	0.473	0.266	4.93425e-09	Ccdc88a
Trim25	1.54647e-13	-0.527654	0.18	0.331	4.99276e-09	Trim25
Ppp1r12a	1.80896e-13	0.251022	0.448	0.24	5.84024e-09	Ppp1r12a
Kif5b	2.21122e-13	0.284965	0.706	0.473	7.13892e-09	Kif5b
Esr1	2.24881e-13	0.264194	0.446	0.245	7.26028e-09	Esr1
H2-D1	2.6479e-13	-0.52292	0.873	0.801	8.54876e-09	H2-D1
Dpep1	2.88567e-13	0.339008	0.901	0.714	9.31637e-09	Dpep1
Angptl1	2.89522e-13	0.303708	0.317	0.154	9.34722e-09	Angptl1
Pmm1	2.95161e-13	-0.637416	0.264	0.391	9.52926e-09	Pmm1
Snrpe	3.20497e-13	-0.472045	0.694	0.68	1.03472e-08	Snrpe
Ccnl1	3.39422e-13	0.265856	0.453	0.246	1.09582e-08	Ccnl1
Arpc1b	3.53842e-13	-0.434616	0.844	0.776	1.14238e-08	Arpc1b
Etfa	4.05324e-13	0.293109	0.684	0.436	1.30859e-08	Etfa
Zeb2	4.26096e-13	0.272687	0.833	0.606	1.37565e-08	Zeb2
Pfdn5	6.00234e-13	-0.338609	0.965	0.889	1.93786e-08	Pfdn5
Scara3	8.26716e-13	0.252257	0.877	0.657	2.66905e-08	Scara3
1700019D03Rik	8.55357e-13	0.291947	0.65	0.408	2.76152e-08	1700019D03Rik
Resf1	1.6293e-12	0.266963	0.354	0.18	5.26019e-08	Resf1
Fxyd5	1.74346e-12	-0.476304	0.055	0.177	5.62876e-08	Fxyd5
Chd4	1.8434e-12	0.262733	0.64	0.41	5.95143e-08	Chd4
Trip11	1.87425e-12	0.266549	0.519	0.306	6.05101e-08	Trip11
Hook3	2.20176e-12	0.277181	0.785	0.552	7.10838e-08	Hook3
Zbtb7a	2.22627e-12	0.255189	0.582	0.35	7.18751e-08	Zbtb7a
Bcl7c	2.60562e-12	-0.469953	0.576	0.606	8.41225e-08	Bcl7c
Lgals3	2.72009e-12	-0.831321	0.442	0.543	8.7818e-08	Lgals3
Chchd2	2.94069e-12	-0.283746	0.987	0.913	9.49401e-08	Chchd2
Emb	4.80552e-12	-0.485248	0.086	0.218	1.55146e-07	Emb
Fkbp7	5.45e-12	0.258231	0.55	0.326	1.75953e-07	Fkbp7
Rock1	6.77567e-12	0.274144	0.624	0.404	2.18753e-07	Rock1
Ost4	6.89948e-12	-0.382082	0.807	0.775	2.2275e-07	Ost4
Mt2	8.29392e-12	-0.636564	0.607	0.659	2.67769e-07	Mt2
Osr1	1.0105e-11	-0.609242	0.64	0.656	3.26239e-07	Osr1
Htra1	1.14352e-11	0.286395	0.943	0.785	3.69184e-07	Htra1
Lmna	1.34483e-11	-0.794864	0.655	0.642	4.34178e-07	Lmna
Cavin1	1.40182e-11	-0.380807	0.965	0.928	4.52578e-07	Cavin1
Rhob	1.7409e-11	0.319099	0.528	0.327	5.62051e-07	Rhob
Dnajc3	2.44903e-11	0.287555	0.783	0.542	7.90669e-07	Dnajc3
Col6a2	2.88359e-11	-0.566703	0.936	0.872	9.30968e-07	Col6a2
Ctsk	3.35855e-11	0.284872	0.703	0.464	1.08431e-06	Ctsk
Duox1	4.02837e-11	-0.557398	0.196	0.32	1.30056e-06	Duox1
Pgls	4.07772e-11	-0.446322	0.618	0.632	1.31649e-06	Pgls
Gpnmb	4.61636e-11	0.268866	0.38	0.214	1.49039e-06	Gpnmb
Chrdl1	5.28409e-11	0.297029	0.842	0.672	1.70597e-06	Chrdl1
Adgrl2	6.32393e-11	0.257295	0.194	0.082	2.04168e-06	Adgrl2
Thbs2	6.45566e-11	0.316835	0.673	0.444	2.08421e-06	Thbs2
Mrps21	8.155e-11	-0.438027	0.65	0.646	2.63284e-06	Mrps21
Hsp90aa1	9.22229e-11	0.274464	0.8	0.601	2.97742e-06	Hsp90aa1
Zfp36l1	1.18868e-10	0.345193	0.941	0.789	3.83766e-06	Zfp36l1
Pdlim4	1.25542e-10	-0.561373	0.235	0.348	4.05312e-06	Pdlim4
Fzd2	1.49573e-10	0.257553	0.499	0.303	4.82897e-06	Fzd2
Hcfc1r1	1.8613e-10	-0.485426	0.71	0.674	6.00922e-06	Hcfc1r1
Psmb9	2.06834e-10	-0.388403	0.094	0.206	6.67765e-06	Psmb9
Btg2	2.14522e-10	0.561197	0.475	0.326	6.92585e-06	Btg2
B2m	2.42297e-10	-0.293157	0.978	0.947	7.82255e-06	B2m
Ndrg1	2.43651e-10	-0.506282	0.185	0.312	7.86626e-06	Ndrg1
Uqcrq	2.43886e-10	-0.441126	0.723	0.684	7.87386e-06	Uqcrq
Sntb2	2.67554e-10	0.263945	0.796	0.589	8.63798e-06	Sntb2
Rnf213	3.16772e-10	-0.525207	0.218	0.338	1.0227e-05	Rnf213
Timp3	3.19024e-10	0.265391	0.982	0.915	1.02997e-05	Timp3
1810037I17Rik	3.43932e-10	-0.45555	0.653	0.65	1.11038e-05	1810037I17Rik
Slfn2	5.94697e-10	-0.466191	0.128	0.248	1.91998e-05	Slfn2
Ftl1	7.78771e-10	-0.26487	0.998	0.961	2.51426e-05	Ftl1
Igfbp6	7.83811e-10	-0.429506	0.987	0.983	2.53053e-05	Igfbp6
Fosb	1.73285e-09	0.52057	0.611	0.468	5.59451e-05	Fosb
Ptges	3.18548e-09	-0.505929	0.29	0.382	0.000102843	Ptges
Sp100	3.39349e-09	-0.537052	0.25	0.35	0.000109559	Sp100
Sec61b	3.50484e-09	-0.338596	0.916	0.84	0.000113154	Sec61b
Mustn1	3.71565e-09	-0.558727	0.536	0.575	0.00011996	Mustn1
Atox1	3.91573e-09	-0.391882	0.901	0.842	0.000126419	Atox1
9930111J21Rik2	5.10303e-09	-0.283348	0.042	0.133	0.000164751	9930111J21Rik2
AW112010	6.61135e-09	-0.371457	0.081	0.184	0.000213447	AW112010
Fbln2	6.68095e-09	0.258573	0.771	0.551	0.000215694	Fbln2
Sod3	8.41656e-09	-0.502724	0.446	0.507	0.000271728	Sod3
Anxa1	9.12344e-09	-0.29895	0.961	0.93	0.00029455	Anxa1
Ubl5	9.58993e-09	-0.348646	0.787	0.743	0.000309611	Ubl5
Arhgef28	1.24455e-08	-0.457358	0.163	0.264	0.000401802	Arhgef28
Rala	1.80565e-08	-0.472104	0.51	0.526	0.000582953	Rala
Sp110	1.98207e-08	-0.409711	0.128	0.231	0.000639911	Sp110
Ccl11	2.05016e-08	-0.477369	0.862	0.814	0.000661894	Ccl11
Tomm6	2.12299e-08	-0.420579	0.694	0.669	0.000685409	Tomm6
Elob	2.29607e-08	-0.268323	0.963	0.88	0.000741287	Elob
Phf11b	2.70238e-08	-0.266627	0.031	0.109	0.000872465	Phf11b
Smdt1	2.92435e-08	-0.341844	0.833	0.752	0.000944125	Smdt1
Atp5j	3.53287e-08	-0.319191	0.839	0.769	0.00114059	Atp5j
Tomm7	3.67749e-08	-0.341209	0.875	0.797	0.00118728	Tomm7
Ppl	3.96038e-08	-0.388452	0.121	0.227	0.00127861	Ppl
Id3	4.00465e-08	-0.589694	0.69	0.702	0.0012929	Id3
Abca8a	5.57923e-08	0.388232	0.378	0.248	0.00180125	Abca8a
Arf5	5.60748e-08	-0.318628	0.881	0.803	0.00181038	Arf5
Polr1d	6.94459e-08	-0.381284	0.648	0.624	0.00224206	Polr1d
Krtdap	7.02215e-08	-0.782031	0.477	0.525	0.0022671	Krtdap
Cd9	8.08911e-08	-0.612022	0.637	0.643	0.00261157	Cd9
Lamtor4	1.01529e-07	-0.407618	0.593	0.581	0.00327786	Lamtor4
Apoe	1.0972e-07	0.622299	0.123	0.05	0.00354231	Apoe
Gas7	1.20382e-07	-0.540199	0.694	0.689	0.00388654	Gas7
Has1	1.46235e-07	0.49788	0.235	0.134	0.00472121	Has1
D630033O11Rik	1.85289e-07	-0.446807	0.194	0.287	0.00598206	D630033O11Rik
Actg1	2.11472e-07	-0.354322	0.982	0.962	0.00682738	Actg1
Prr13	2.20812e-07	-0.507375	0.528	0.529	0.00712891	Prr13
Ccdc85b	2.21225e-07	-0.466554	0.439	0.471	0.00714226	Ccdc85b
Kitl	3.67708e-07	-0.441429	0.224	0.322	0.0118715	Kitl
Socs3	3.81213e-07	0.268344	0.472	0.333	0.0123075	Socs3
Tppp3	3.83489e-07	-0.510815	0.684	0.672	0.012381	Tppp3
Ndufb9	4.35093e-07	-0.313048	0.772	0.731	0.014047	Ndufb9
Timm13	5.51979e-07	-0.34684	0.666	0.635	0.0178206	Timm13
H2afj	5.95326e-07	-0.397147	0.393	0.444	0.0192201	H2afj
Hspe1	6.01631e-07	-0.348715	0.741	0.695	0.0194236	Hspe1
Egr1	6.27996e-07	0.41457	0.76	0.675	0.0202748	Egr1
Gapdh	6.86881e-07	-0.329201	0.828	0.756	0.022176	Gapdh
Myoc	7.96037e-07	-1.10113	0.106	0.198	0.0257001	Myoc
AC149090.1	9.38226e-07	-0.378851	0.165	0.255	0.0302906	AC149090.1
Sord	9.59767e-07	-0.446008	0.213	0.284	0.0309861	Sord
Angpt1	1.01035e-06	0.251049	0.163	0.083	0.0326191	Angpt1
S100a1	1.08329e-06	-0.384724	0.202	0.284	0.0349741	S100a1
Ccnd1	1.40018e-06	-0.309853	0.143	0.236	0.0452049	Ccnd1
Oaf	1.45073e-06	-0.535315	0.648	0.597	0.0468367	Oaf
Eif4g2	1.48826e-06	-0.322784	0.886	0.819	0.0480486	Eif4g2
Mgll	1.74219e-06	-0.378719	0.679	0.637	0.0562465	Mgll
Psmb8	1.91463e-06	-0.439907	0.365	0.409	0.0618137	Psmb8
Lgi2	2.18816e-06	-0.32118	0.086	0.165	0.0706448	Lgi2
Ntrk2	2.64938e-06	0.298624	0.378	0.25	0.0855352	Ntrk2
Xaf1	2.99349e-06	-0.413408	0.211	0.292	0.0966448	Xaf1
Gm47283	3.0002e-06	-0.355787	0.174	0.257	0.0968613	Gm47283
Mgarp	3.02964e-06	-0.258533	0.066	0.14	0.0978121	Mgarp
Emp1	3.06382e-06	-0.45569	0.519	0.559	0.0989155	Emp1
Trmt112	3.07046e-06	-0.374835	0.545	0.538	0.0991297	Trmt112
Ndufa7	3.23972e-06	-0.311044	0.82	0.729	0.104594	Ndufa7
Zbp1	3.51041e-06	-0.402283	0.222	0.298	0.113333	Zbp1
Gm2000	3.56219e-06	-0.378471	0.341	0.392	0.115005	Gm2000
Guk1	5.45017e-06	-0.404922	0.383	0.418	0.175959	Guk1
Lmo4	6.67472e-06	-0.446641	0.288	0.346	0.215493	Lmo4
Itgb1	7.92452e-06	-0.280918	0.908	0.824	0.255843	Itgb1
Ccn5	8.04471e-06	-0.366713	0.053	0.122	0.259723	Ccn5
Blvrb	8.2614e-06	-0.348393	0.767	0.681	0.266719	Blvrb
Ifi35	8.3157e-06	-0.35738	0.222	0.293	0.268472	Ifi35
Oasl2	8.32324e-06	-0.372109	0.204	0.283	0.268716	Oasl2
Twf2	8.74251e-06	-0.306611	0.138	0.218	0.282252	Twf2
Ndufb11	8.75608e-06	-0.272414	0.848	0.752	0.28269	Ndufb11
Podn	8.88415e-06	-0.296678	0.154	0.238	0.286825	Podn
Fth1	9.23736e-06	-0.320967	1	0.991	0.298228	Fth1
Rtp4	9.32236e-06	-0.329177	0.165	0.247	0.300972	Rtp4
Pabpc1	9.56177e-06	-0.360415	0.846	0.793	0.308702	Pabpc1
Vkorc1	1.30531e-05	-0.296737	0.765	0.708	0.421418	Vkorc1
Rhoc	1.41641e-05	-0.305679	0.817	0.733	0.457287	Rhoc
Dhrs9	1.51055e-05	-0.272887	0.084	0.154	0.48768	Dhrs9
1110038B12Rik	1.63955e-05	-0.352758	0.165	0.238	0.529328	1110038B12Rik
Ly6e	1.6456e-05	-0.39363	0.78	0.729	0.531281	Ly6e
Fos	1.76984e-05	0.353952	0.743	0.688	0.571393	Fos
Aprt	1.77581e-05	-0.356882	0.528	0.522	0.57332	Aprt
Cmc1	2.22321e-05	-0.313793	0.172	0.244	0.717762	Cmc1
Pomp	2.22789e-05	-0.31935	0.661	0.627	0.719276	Pomp
Slco2a1	2.51662e-05	-0.516147	0.215	0.279	0.812491	Slco2a1
Slfn5	2.57551e-05	-0.351791	0.739	0.689	0.831502	Slfn5
Ptgs2	2.68691e-05	0.3812	0.248	0.154	0.86747	Ptgs2
S100a4	2.76993e-05	-1.16698	0.378	0.428	0.894273	S100a4
Matn2	2.98448e-05	-0.421807	0.248	0.307	0.96354	Matn2
Phlda3	3.15646e-05	-0.448782	0.178	0.248	1	Phlda3
Prelid1	3.32418e-05	-0.356664	0.538	0.521	1	Prelid1
Rtraf	3.64923e-05	-0.341496	0.677	0.62	1	Rtraf
Ehd1	3.92501e-05	-0.356251	0.572	0.561	1	Ehd1
Pdlim2	3.97075e-05	-0.390725	0.547	0.523	1	Pdlim2
Clta	4.75412e-05	-0.263937	0.758	0.703	1	Clta
Fzd10os	4.83182e-05	-0.405168	0.259	0.31	1	Fzd10os
Lsm7	6.28898e-05	-0.33881	0.406	0.432	1	Lsm7
Cdkn1a	6.43935e-05	-0.602482	0.352	0.408	1	Cdkn1a
Esd	6.54486e-05	-0.35074	0.631	0.58	1	Esd
Mrpl30	6.79324e-05	-0.307097	0.539	0.538	1	Mrpl30
Hypk	6.9047e-05	-0.302929	0.492	0.506	1	Hypk
Pfn1	7.08271e-05	-0.309495	0.888	0.769	1	Pfn1
Tbca	7.14852e-05	-0.312011	0.738	0.671	1	Tbca
Atp5g3	7.36143e-05	-0.295569	0.683	0.625	1	Atp5g3
Ndufb10	7.39449e-05	-0.285553	0.719	0.665	1	Ndufb10
Plekhf1	7.58909e-05	-0.328265	0.169	0.233	1	Plekhf1
Tmem158	8.05989e-05	-0.403427	0.556	0.543	1	Tmem158
Sult5a1	8.17977e-05	-0.342774	0.486	0.516	1	Sult5a1
Lamtor2	9.57338e-05	-0.298888	0.679	0.606	1	Lamtor2
Uqcr10	9.88219e-05	-0.268775	0.809	0.717	1	Uqcr10
Atpif1	0.000105901	-0.298837	0.8	0.712	1	Atpif1
Abi3bp	0.000110134	-0.286591	0.694	0.641	1	Abi3bp
Nfkbia	0.000112522	-0.501902	0.574	0.596	1	Nfkbia
Mmp3	0.000113881	-0.349633	0.081	0.145	1	Mmp3
Cdc42ep5	0.000114853	-0.32148	0.248	0.304	1	Cdc42ep5
Psme1	0.000125152	-0.289828	0.639	0.603	1	Psme1
Phf11d	0.000131853	-0.317235	0.163	0.228	1	Phf11d
Tmem229a	0.000162704	-0.434316	0.141	0.202	1	Tmem229a
Pla1a	0.00018287	-0.569921	0.257	0.305	1	Pla1a
Mgst3	0.000187564	-0.399504	0.139	0.203	1	Mgst3
Prelp	0.000190372	-0.276979	0.49	0.514	1	Prelp
Cox7a2	0.000191621	-0.254218	0.829	0.723	1	Cox7a2
Prdx5	0.000212748	-0.278185	0.745	0.698	1	Prdx5
Col8a1	0.000269017	0.464447	0.15	0.091	1	Col8a1
Klf4	0.000348481	0.329938	0.938	0.885	1	Klf4
Psme2	0.000356719	-0.343073	0.47	0.471	1	Psme2
Selenom	0.000366586	-0.26174	0.941	0.809	1	Selenom
Plaat3	0.000399688	-0.280709	0.207	0.264	1	Plaat3
H2afv	0.000433725	-0.316804	0.62	0.573	1	H2afv
C2	0.000443386	-0.299239	0.211	0.273	1	C2
Mndal	0.000503221	-0.377804	0.328	0.368	1	Mndal
Ifit1	0.000530373	-0.494048	0.172	0.238	1	Ifit1
Cd109	0.000537786	-0.326176	0.242	0.288	1	Cd109
Timp1	0.000552668	-0.397154	0.095	0.15	1	Timp1
Itm2c	0.000581279	-0.325677	0.624	0.595	1	Itm2c
H2-T22	0.000595203	-0.315106	0.235	0.282	1	H2-T22
Tma7	0.000659627	-0.253814	0.828	0.733	1	Tma7
Mrpl54	0.000663186	-0.291621	0.501	0.484	1	Mrpl54
Pitpna	0.000675523	-0.341891	0.411	0.42	1	Pitpna
Gng12	0.000695358	-0.328725	0.552	0.526	1	Gng12
Mcub	0.000703789	-0.31214	0.224	0.272	1	Mcub
Npdc1	0.000707288	-0.290154	0.572	0.554	1	Npdc1
Scand1	0.000724571	-0.252056	0.723	0.659	1	Scand1
Ndufb8	0.000832447	-0.297403	0.583	0.533	1	Ndufb8
Timm8b	0.000995464	-0.302991	0.514	0.496	1	Timm8b
Tmem106a	0.001043	-0.250509	0.117	0.169	1	Tmem106a
Eloc	0.00109467	-0.309364	0.418	0.429	1	Eloc
Calm3	0.0011073	-0.307837	0.67	0.617	1	Calm3
Ndufb2	0.00112314	-0.303034	0.576	0.524	1	Ndufb2
Mrps16	0.0012021	-0.279256	0.47	0.458	1	Mrps16
Sh3glb1	0.001248	-0.257994	0.804	0.702	1	Sh3glb1
Rras	0.00169432	-0.296508	0.593	0.568	1	Rras
Glipr2	0.00173335	-0.301339	0.374	0.398	1	Glipr2
Psma7	0.00179304	-0.289568	0.655	0.595	1	Psma7
Pttg1	0.00186011	-0.307233	0.27	0.305	1	Pttg1
Cdh11	0.0018795	0.2805	0.209	0.148	1	Cdh11
Gnb2	0.00189601	-0.252302	0.872	0.774	1	Gnb2
Hebp2	0.00196598	-0.345639	0.365	0.38	1	Hebp2
Gdi1	0.00204731	-0.282532	0.319	0.349	1	Gdi1
Cox14	0.00205576	-0.274593	0.479	0.459	1	Cox14
Cfb	0.00206482	-0.286065	0.29	0.33	1	Cfb
Cycs	0.00213511	-0.282542	0.277	0.311	1	Cycs
Trim30a	0.002222	-0.346799	0.294	0.323	1	Trim30a
Shisa5	0.00224593	-0.275084	0.651	0.602	1	Shisa5
Cenpx	0.00226602	-0.290675	0.486	0.466	1	Cenpx
Sfxn3	0.00228922	-0.337412	0.29	0.316	1	Sfxn3
Psmb10	0.00235915	-0.316108	0.314	0.336	1	Psmb10
Fis1	0.00252239	-0.275388	0.622	0.571	1	Fis1
Ube2l6	0.00285775	-0.250436	0.16	0.205	1	Ube2l6
Bhlhe40	0.00293723	-0.274475	0.081	0.124	1	Bhlhe40
Vat1	0.00315018	-0.25047	0.802	0.701	1	Vat1
Tbcb	0.00353526	-0.263984	0.433	0.426	1	Tbcb
Svil	0.00356563	-0.289648	0.71	0.632	1	Svil
Ran	0.00368896	-0.356563	0.618	0.544	1	Ran
Palld	0.00368983	-0.315855	0.194	0.237	1	Palld
Mex3b	0.00386651	-0.275465	0.101	0.144	1	Mex3b
Serpina3c	0.00403751	-0.310582	0.158	0.198	1	Serpina3c
Capg	0.00407607	-0.346477	0.512	0.492	1	Capg
Ndufb7	0.00409007	-0.263571	0.657	0.581	1	Ndufb7
Ifit3	0.00410076	-0.289027	0.092	0.136	1	Ifit3
Ehd2	0.0046481	-0.291553	0.717	0.633	1	Ehd2
Ccn1	0.0047102	-0.452305	0.325	0.368	1	Ccn1
Bola2	0.00478216	-0.275573	0.475	0.475	1	Bola2
Mrpl58	0.00512933	-0.252693	0.237	0.273	1	Mrpl58
Cox5a	0.00539905	-0.252338	0.563	0.51	1	Cox5a
Npr1	0.0054314	-0.304568	0.468	0.45	1	Npr1
Vcan	0.00609749	-0.373698	0.437	0.437	1	Vcan
Mmp14	0.0062038	-0.381334	0.848	0.752	1	Mmp14
Stat2	0.00642462	-0.28167	0.176	0.218	1	Stat2
Duoxa1	0.0068438	-0.280647	0.233	0.266	1	Duoxa1
1810058I24Rik	0.0074678	-0.264407	0.607	0.542	1	1810058I24Rik
Dnajc19	0.00778096	-0.278741	0.47	0.438	1	Dnajc19
Il1r1	0.00814658	-0.276797	0.198	0.24	1	Il1r1
Col18a1	0.0082465	-0.278215	0.101	0.139	1	Col18a1
Phlda1	0.00865345	-0.272296	0.317	0.349	1	Phlda1
Rab32	0.00877715	-0.286307	0.189	0.223	1	Rab32
H19	0.00892076	0.293639	0.117	0.077	1	H19
Gnb1	0.00900362	-0.261874	0.806	0.713	1	Gnb1
Coa3	0.0104395	-0.255533	0.552	0.5	1	Coa3
Ptgis	0.0114166	-0.325287	0.51	0.465	1	Ptgis
Nme1	0.0117322	-0.302426	0.481	0.445	1	Nme1
Cxcl13	0.0122939	-1.12543	0.275	0.308	1	Cxcl13
Ndufab1	0.0126333	-0.268733	0.508	0.461	1	Ndufab1
Cd44	0.0132726	-0.318954	0.182	0.215	1	Cd44
Il1rl2	0.0132937	-0.282444	0.25	0.274	1	Il1rl2
Igfbp7	0.0140115	-0.654044	0.231	0.275	1	Igfbp7
Pim1	0.0163607	-0.293741	0.112	0.146	1	Pim1
Tagln2	0.0173777	-0.29075	0.404	0.407	1	Tagln2
Il33	0.0187818	-0.452411	0.516	0.494	1	Il33
Chchd1	0.0191705	-0.252251	0.508	0.466	1	Chchd1
Abracl	0.0203284	-0.265459	0.42	0.403	1	Abracl
Iigp1	0.0213241	-0.357363	0.246	0.274	1	Iigp1
Tpm4	0.0214935	-0.265393	0.648	0.568	1	Tpm4
Irgm2	0.0218634	-0.26397	0.172	0.203	1	Irgm2
Pold4	0.0221066	-0.261727	0.242	0.263	1	Pold4
Nsg1	0.0233172	-0.288132	0.213	0.238	1	Nsg1
Tapbp	0.0248545	-0.254657	0.699	0.645	1	Tapbp
Il1r2	0.02507	-0.284403	0.149	0.181	1	Il1r2
Plau	0.0258903	-0.392153	0.378	0.366	1	Plau
Churc1	0.0262649	-0.261729	0.371	0.367	1	Churc1
Clic1	0.0270781	-0.284129	0.769	0.65	1	Clic1
Gm10076	0.0280589	-0.288107	0.308	0.322	1	Gm10076
Cdv3	0.0316613	-0.257239	0.481	0.454	1	Cdv3
Jdp2	0.0321214	-0.254135	0.251	0.271	1	Jdp2
Sec14l1	0.0341127	-0.266658	0.585	0.522	1	Sec14l1
Ifi211	0.0402574	-0.292288	0.394	0.378	1	Ifi211
Ywhah	0.0410957	-0.322803	0.455	0.424	1	Ywhah
Zfp706	0.0443566	-0.26025	0.501	0.456	1	Zfp706
Cdc42ep2	0.0471123	-0.294858	0.481	0.449	1	Cdc42ep2
Mgat1	0.0504456	-0.250852	0.281	0.289	1	Mgat1
Gm42418	0.0561878	-0.288723	1	1	1	Gm42418	excluded
Basp1	0.0604467	-0.282398	0.782	0.702	1	Basp1
Eif4ebp1	0.0743332	-0.250319	0.349	0.338	1	Eif4ebp1
Il34	0.0772092	-0.292678	0.327	0.326	1	Il34
Gan	0.0836463	-0.399733	0.297	0.294	1	Gan
Gbp2	0.089676	-0.288901	0.266	0.27	1	Gbp2
Vdac1	0.101001	-0.252686	0.356	0.342	1	Vdac1
Sbsn	0.104947	-0.289206	0.681	0.631	1	Sbsn
C4b	0.105673	-0.327194	0.154	0.176	1	C4b
Flnc	0.137278	-0.304336	0.442	0.399	1	Flnc
Cstb	0.152821	-0.305368	0.569	0.5	1	Cstb
Rab7b	0.180329	-0.28974	0.481	0.423	1	Rab7b
Cd200	0.181692	-0.262566	0.141	0.152	1	Cd200
Lysmd2	0.190025	-0.256651	0.327	0.312	1	Lysmd2
Sned1	0.238359	-0.348276	0.22	0.227	1	Sned1
Dnajb1	0.280265	-0.32027	0.228	0.234	1	Dnajb1
Cmip	0.329983	-0.256522	0.303	0.28	1	Cmip
Msx1	0.336491	-0.261712	0.217	0.216	1	Msx1
Crip2	0.366905	-0.320935	0.31	0.294	1	Crip2
Cox17	0.37056	-0.26494	0.398	0.363	1	Cox17
Arap1	0.443127	-0.256006	0.255	0.242	1	Arap1
Sfrp4	0.556937	-0.500079	0.486	0.439	1	Sfrp4

## Sheet: Sup Table 6
Supp Table 6 Suture CD90 Young vs Adult	p_val	avg_log2FC	pct.1	pct.2	p_val_adj
mt-Nd3	1.15962e-12	1.52484	0.974	0.5	3.74384e-08
mt-Co3	5.93732e-12	1.19238	1	0.968	1.91686e-07
mt-Nd1	6.42818e-11	1.27044	1	0.887	2.07534e-06
mt-Co1	2.80569e-10	0.884181	1	1	9.05818e-06
Rps15	1.32411e-09	1.12146	0.974	0.855	4.2749e-05
Col3a1	4.72119e-09	1.92513	1	0.887	0.000152424
Rps12	1.70521e-08	0.999167	1	0.984	0.000550528
mt-Nd2	1.83913e-08	1.04021	1	0.887	0.000593763
Tpt1	2.0868e-08	0.783016	1	0.984	0.000673723
Rpl23a	3.45582e-08	0.888708	1	0.839	0.00111571
mt-Atp6	5.00337e-08	0.909373	1	0.984	0.00161534
Rpl5	1.64262e-07	0.757662	1	0.887	0.00530321
Kcnq1ot1	3.61041e-07	1.39449	0.846	0.371	0.0116562
Rpl12	4.02845e-07	1.02854	1	0.952	0.0130058
Hba-a1	5.22035e-07	5.45745	0.436	0.032	0.0168539
Rps25	5.49036e-07	0.865355	1	0.952	0.0177256
Col1a2	7.45853e-07	0.971227	0.974	0.968	0.0240799
Rpl13a	7.85201e-07	0.856164	0.974	0.919	0.0253502
mt-Co2	1.06508e-06	0.664989	1	0.984	0.0343861
Srrm2	1.09903e-06	0.709396	0.974	0.661	0.0354821
Bach2	1.13142e-06	1.03722	0.487	0.065	0.036528
Nrk	1.20785e-06	0.369873	0.436	0.032	0.0389956
Clk1	1.30932e-06	0.795279	0.718	0.194	0.0422716
Ezh2	1.46999e-06	0.984796	0.513	0.081	0.0474586
Tbpl1	2.19787e-06	0.49472	0.487	0.065	0.0709581
Rbm25	2.29199e-06	0.739516	0.923	0.468	0.073997
Col1a1	2.58278e-06	0.588736	0.974	0.952	0.083385
Sparc	2.72009e-06	0.749879	1	0.968	0.0878182
Zbtb20	3.56151e-06	0.925179	0.974	0.823	0.114983
Meg3	3.96053e-06	1.56725	0.846	0.532	0.127866
Syk	4.38191e-06	0.79661	0.641	0.194	0.14147
Spib	4.75276e-06	1.03157	0.385	0.032	0.153443
Rian	4.90251e-06	0.779622	0.564	0.145	0.158278
Rps17	6.06202e-06	0.656169	0.974	0.903	0.195712
Tcf7l1	6.43329e-06	0.633016	0.41	0.048	0.207699
Col5a2	6.63966e-06	0.785504	0.949	0.645	0.214361
Scai	6.81624e-06	0.46992	0.333	0.016	0.220062
Eif3a	7.53678e-06	0.721633	0.897	0.468	0.243325
Hbb-bt	8.17791e-06	5.14339	0.41	0.048	0.264024
Zfp800	8.57735e-06	0.447987	0.41	0.048	0.27692
Kdm6a	9.20022e-06	0.537633	0.462	0.081	0.297029
Xist	9.91395e-06	0.959123	0.974	0.823	0.320072
Pum2	1.00154e-05	0.580403	0.744	0.242	0.323346
Dnajc7	1.04268e-05	1.13848	0.718	0.242	0.336629
Itfg1	1.04971e-05	0.532753	0.462	0.081	0.338898
Pdp1	1.12388e-05	0.303925	0.282	0	0.362845
Dpysl2	1.13822e-05	0.754406	0.615	0.161	0.367473
Fndc3b	1.19168e-05	0.771392	0.795	0.323	0.384733
Nemf	1.27362e-05	0.617322	0.564	0.129	0.411188
Agtr1a	1.31156e-05	0.504333	0.41	0.048	0.423436
Aspn	1.33661e-05	0.877719	0.769	0.355	0.431525
Ncapd3	1.42161e-05	0.618442	0.359	0.032	0.458966
Col5a1	1.44782e-05	0.823573	0.949	0.548	0.467428
Nid1	1.56636e-05	1.22613	0.872	0.677	0.505699
Banf1	1.59968e-05	0.749227	0.59	0.177	0.516455
Fryl	1.68896e-05	0.628654	0.436	0.065	0.54528
Gabpb2	1.74288e-05	0.552912	0.564	0.129	0.562688
Fth1	2.19115e-05	-0.735983	1	1	0.707414
Zeb1	2.26753e-05	0.688875	0.667	0.242	0.732074
Tfrc	2.72163e-05	0.65036	0.308	0.016	0.878677
Igf1	3.09259e-05	0.985441	0.718	0.226	0.998441
Rack1	3.67695e-05	0.735115	0.949	0.903	1
Limch1	3.71e-05	0.571162	0.564	0.145	1
Srpx	3.79484e-05	0.650678	0.436	0.081	1
Epb41l3	3.87405e-05	0.479504	0.41	0.065	1
Sem1	4.16013e-05	-0.788403	0.949	0.935	1
C1galt1	4.59814e-05	0.83683	0.564	0.177	1
Rab6b	4.6745e-05	0.4616	0.436	0.081	1
Rpl31	4.69128e-05	0.593293	1	0.903	1
Uggt1	4.7856e-05	0.479192	0.538	0.129	1
Igfbp3	4.80459e-05	1.1469	0.333	0.032	1
Slc16a1	4.80849e-05	0.399729	0.41	0.065	1
4932438A13Rik	4.85354e-05	0.435074	0.718	0.258	1
Fam53b	4.87222e-05	0.694035	0.436	0.081	1
Pcolce2	5.19501e-05	0.969838	0.846	0.613	1
Gm10115	5.23907e-05	0.496138	0.41	0.065	1
Dleu2	5.35801e-05	0.439296	0.564	0.145	1
Xrcc6	5.68112e-05	0.489256	0.385	0.065	1
Slbp	5.72646e-05	0.808643	0.462	0.097	1
Nudt21	5.8007e-05	0.512553	0.59	0.161	1
Arhgap1	5.95818e-05	0.452882	0.462	0.097	1
Ttc14	6.00339e-05	0.579033	0.744	0.29	1
Suz12	6.08605e-05	0.519282	0.513	0.129	1
Nova1	6.1001e-05	0.843372	0.641	0.242	1
Lcor	6.2592e-05	0.42697	0.359	0.048	1
Man2a1	6.38228e-05	0.692478	0.821	0.403	1
Chchd10	6.4485e-05	0.705968	0.462	0.097	1
Appbp2	6.70776e-05	0.362633	0.462	0.097	1
Gabarap	6.90882e-05	-0.577392	1	1	1
Vpreb3	7.06504e-05	1.07173	0.513	0.129	1
Snhg8	7.595e-05	0.423108	0.795	0.306	1
Peg3	7.84674e-05	0.399915	0.462	0.097	1
Gpr171	8.1127e-05	0.596385	0.282	0.016	1
Ylpm1	8.19573e-05	0.324463	0.359	0.048	1
Klf9	8.34998e-05	0.824639	0.821	0.387	1
Hdac2	8.35336e-05	0.501997	0.615	0.21	1
Sgo2a	8.46361e-05	0.375647	0.231	0	1
Thoc2	8.78126e-05	0.862565	0.641	0.242	1
Hmgcs1	8.98061e-05	0.498696	0.487	0.113	1
Zfp280d	9.34001e-05	0.444802	0.436	0.081	1
Atrx	9.62867e-05	0.668189	0.872	0.468	1
Apaf1	9.78782e-05	0.336034	0.359	0.048	1
Meox2	0.000101153	0.453324	0.436	0.081	1
Armc1	0.00010695	0.331391	0.462	0.097	1
Ighm	0.000108969	1.48583	0.641	0.29	1
Eln	0.000109421	0.610408	0.744	0.29	1
Mrgprg	0.000113343	-1.74767	0.103	0.435	1
Galnt15	0.000115463	0.375004	0.462	0.097	1
Luc7l3	0.000120469	0.542164	0.615	0.21	1
Apc	0.000122601	0.574515	0.564	0.177	1
Lpp	0.000125896	0.581825	0.846	0.387	1
Csf1	0.000127444	0.488341	0.667	0.258	1
Akap12	0.00013688	0.772783	0.821	0.5	1
Gpc3	0.000137814	0.796052	0.872	0.5	1
Nsd2	0.00013801	0.577301	0.462	0.113	1
Lpl	0.000141381	1.60967	0.795	0.355	1
Prrc2c	0.000142048	0.765322	0.923	0.548	1
Tgfb2	0.000146303	0.761503	0.487	0.145	1
Plagl1	0.000149582	0.459935	0.333	0.048	1
Mbnl1	0.0001523	0.563439	0.949	0.565	1
Rpl17	0.000154268	0.560127	1	0.984	1
Tcf7l2	0.000155008	0.575214	0.59	0.194	1
Taf3	0.000156735	0.361125	0.385	0.065	1
8030462N17Rik	0.000157341	0.316007	0.256	0.016	1
Rcc2	0.000172182	0.259341	0.41	0.081	1
Herc1	0.000173927	0.537315	0.615	0.177	1
Abhd17b	0.000178348	0.444237	0.333	0.048	1
Rock1	0.000185335	0.628528	0.897	0.532	1
Ankrd17	0.000186464	0.508702	0.744	0.306	1
Tnrc6b	0.00019123	0.454453	0.846	0.548	1
S1pr4	0.000193316	0.276929	0.256	0.016	1
Cnot6	0.00019445	0.48125	0.59	0.21	1
Tead1	0.00019455	0.399255	0.487	0.113	1
Wdfy2	0.000194609	0.409211	0.333	0.048	1
Peli1	0.000196992	0.359061	0.564	0.161	1
Anp32e	0.000197485	0.624045	0.667	0.258	1
Loxl2	0.000197485	0.916606	0.641	0.274	1
Pom121	0.000200703	0.396158	0.436	0.097	1
Spsb1	0.000202912	0.523011	0.436	0.113	1
Col6a3	0.000210838	1.01183	0.795	0.484	1
Tubgcp3	0.000214077	0.309373	0.256	0.016	1
Arid1b	0.000214563	0.400624	0.462	0.113	1
Cnrip1	0.000216655	0.56862	0.462	0.129	1
Myb	0.000216902	0.605944	0.308	0.048	1
Clock	0.000220807	0.468578	0.487	0.129	1
Nop56	0.000221633	0.365634	0.333	0.048	1
Phlpp1	0.000225226	0.330737	0.256	0.016	1
Ccnt1	0.000226412	0.475186	0.667	0.242	1
Btrc	0.000226443	0.38832	0.333	0.048	1
Srsf2	0.000226892	0.711525	0.744	0.371	1
Rfc5	0.000227425	0.28614	0.205	0	1
Dlgap5	0.000227425	0.274358	0.205	0	1
Cd2ap	0.000228346	0.691607	0.59	0.21	1
Rhoh	0.000229753	0.63319	0.385	0.081	1
Nbeal1	0.000230061	0.571971	0.615	0.242	1
Cecr2	0.000238654	0.596324	0.282	0.032	1
Adam19	0.000239155	0.569145	0.462	0.113	1
Nbr1	0.000239155	0.438382	0.462	0.113	1
Sod1	0.000244794	0.372601	0.692	0.242	1
Cdk19	0.000248516	0.505461	0.385	0.081	1
Tpp2	0.000257898	0.397798	0.359	0.065	1
Rpl9	0.000260647	-0.603156	1	1	1
Tpp1	0.000265358	0.474898	0.487	0.145	1
Camk1d	0.00026861	0.490802	0.359	0.065	1
Rps29	0.000271462	0.41123	0.974	1	1
Ecm2	0.0002726	0.506097	0.564	0.177	1
Ash1l	0.000274075	0.742086	0.692	0.339	1
Cacul1	0.000274576	0.34606	0.282	0.032	1
Rhoj	0.000285591	0.713604	0.718	0.355	1
Fxyd5	0.000291618	-1.72336	0.333	0.661	1
Srebf2	0.00029228	0.25894	0.538	0.145	1
Resf1	0.000293609	0.645373	0.667	0.258	1
Mrpl33	0.00029689	-0.791928	0.821	0.887	1
Rnf139	0.000311923	0.310792	0.333	0.048	1
Lpar1	0.000323688	0.432386	0.692	0.29	1
Man1a	0.000325594	0.937502	0.821	0.597	1
Pcnt	0.000342156	0.290989	0.359	0.065	1
Ccdc88a	0.000355916	0.599622	0.615	0.226	1
Ctr9	0.00036055	0.297738	0.513	0.129	1
Pbrm1	0.000362784	0.502869	0.897	0.484	1
Ntrk2	0.000363214	0.536338	0.538	0.161	1
Col4a1	0.000365029	1.17485	0.615	0.242	1
R3hdm1	0.000376033	0.270748	0.564	0.177	1
Dcbld2	0.000384268	0.377862	0.487	0.129	1
Nbea	0.000385628	0.470791	0.359	0.065	1
H3f3a	0.000389678	0.49838	1	0.952	1
Msl2	0.000397551	0.317345	0.487	0.129	1
Ccz1	0.000403652	0.289354	0.436	0.097	1
Setx	0.000406687	0.408017	0.513	0.161	1
Col4a2	0.000414159	1.06172	0.436	0.129	1
Edf1	0.000416751	-0.806477	0.718	0.855	1
S100a11	0.000421544	-1.02846	0.949	0.952	1
Nipbl	0.000431268	0.588639	0.821	0.452	1
Ap5m1	0.000434318	0.295124	0.282	0.032	1
Arl6ip6	0.000434718	0.411021	0.308	0.048	1
Zfp608	0.000453561	0.466974	0.308	0.048	1
Nav1	0.000453609	0.555342	0.795	0.403	1
Adcy7	0.000454358	0.294088	0.282	0.032	1
Setdb1	0.000454913	0.257244	0.231	0.016	1
Fcrla	0.000456362	0.569889	0.333	0.065	1
Adam33	0.000459007	0.492819	0.59	0.194	1
Lypla2	0.000459359	0.369167	0.385	0.081	1
Smarca4	0.000461502	0.76363	0.538	0.21	1
Med13	0.000465522	0.514904	0.692	0.29	1
Tm9sf1	0.000469729	0.269931	0.359	0.065	1
Nvl	0.000473164	0.390532	0.308	0.048	1
Ehd4	0.000473164	0.376804	0.308	0.048	1
Mki67	0.000475057	1.56618	0.333	0.065	1
Cnnm3	0.000475259	0.283493	0.282	0.032	1
Zfp292	0.000478531	0.43827	0.692	0.306	1
Ar	0.000488018	0.580393	0.846	0.516	1
Supt5	0.000492098	0.342042	0.513	0.145	1
Smarca5	0.000510158	0.640177	0.821	0.435	1
Cep170	0.000511622	0.377937	0.692	0.258	1
Plaa	0.000514763	0.322851	0.308	0.048	1
Ints6	0.000514763	0.491191	0.308	0.048	1
Eif2s3x	0.000521814	0.436064	0.538	0.177	1
Zfp518a	0.000527391	0.49247	0.436	0.129	1
Klhl12	0.000529023	0.320258	0.231	0.016	1
Pcdh20	0.000529023	0.3689	0.231	0.016	1
C1qtnf1	0.000529076	0.608555	0.462	0.145	1
Lyar	0.000534574	0.362731	0.41	0.097	1
Arhgap17	0.000542551	0.392348	0.513	0.145	1
Anp32b	0.000550039	0.670722	0.872	0.5	1
Ly6d	0.000552975	0.675393	0.462	0.129	1
Tns1	0.000554777	0.471355	0.718	0.339	1
Polg	0.000556129	0.286648	0.231	0.016	1
Rhobtb2	0.000556129	0.388743	0.231	0.016	1
Phip	0.000563325	0.511806	0.744	0.339	1
Gps2	0.000565431	0.493896	0.462	0.145	1
Zranb2	0.000568469	0.556925	0.667	0.306	1
Taf1	0.000574393	0.346894	0.462	0.113	1
Elk4	0.000580148	0.411005	0.513	0.161	1
Foxj3	0.000583594	0.30777	0.308	0.048	1
Mapre2	0.000584249	0.446007	0.436	0.129	1
Qrich1	0.000588048	0.393368	0.385	0.097	1
Ptprcap	0.000591471	0.57812	0.538	0.177	1
Sox4	0.000592505	0.752771	0.538	0.194	1
Pde7a	0.000592646	0.393836	0.436	0.113	1
Mir100hg	0.000597125	0.361839	0.59	0.21	1
Smc2	0.000603083	0.567804	0.333	0.065	1
Trim59	0.000603809	0.315191	0.179	0	1
Gm30211	0.000603809	0.408953	0.179	0	1
Card10	0.000603809	0.316561	0.179	0	1
Chaf1a	0.000603809	0.314391	0.179	0	1
Fbn1	0.000603979	0.841946	0.897	0.726	1
Ankrd10	0.00060838	0.376348	0.308	0.048	1
Mtss1	0.00060838	0.452313	0.308	0.048	1
Pigk	0.000609844	0.352725	0.359	0.081	1
AI662270	0.000627315	0.345277	0.333	0.065	1
Tuba4a	0.000627354	0.70376	0.282	0.048	1
Celf2	0.000629199	0.592166	0.846	0.565	1
Rab38	0.000634142	0.359622	0.308	0.048	1
Irs2	0.000634142	0.356104	0.308	0.048	1
Eps15	0.000651694	0.611328	0.564	0.21	1
Psmc3	0.000654319	0.4175	0.718	0.371	1
Ikzf1	0.000655452	0.493253	0.385	0.097	1
Cspp1	0.000662002	0.268242	0.41	0.097	1
Arhgap5	0.000667408	0.559334	0.718	0.306	1
Rev3l	0.000669705	0.413855	0.538	0.177	1
Sfrp2	0.000671327	-1.36402	0.769	0.435	1
Pik3r1	0.000675482	0.406257	0.846	0.419	1
Spin1	0.000678517	0.329321	0.333	0.065	1
Irf4	0.00070848	0.405249	0.359	0.081	1
Pdgfra	0.000712143	0.711878	0.795	0.452	1
Csk	0.000712334	0.518934	0.538	0.177	1
Slc25a37	0.000712638	1.052	0.282	0.048	1
Lockd	0.000718364	0.662317	0.256	0.032	1
Creb1	0.000735903	0.41281	0.487	0.161	1
Ebf1	0.000738918	0.701841	0.974	0.839	1
Evi5	0.000743841	0.384275	0.487	0.145	1
Cux1	0.000747177	0.448877	0.513	0.161	1
Ly6e	0.000747219	0.649994	0.923	0.565	1
Trak2	0.000747643	0.3948	0.41	0.113	1
Chchd2	0.000783264	-0.560443	1	0.952	1
Pik3ap1	0.000786089	0.316503	0.256	0.032	1
Lpcat3	0.000792776	0.252936	0.333	0.065	1
Phf20l1	0.000813846	0.523562	0.641	0.274	1
Selenow	0.000833254	-0.687206	0.974	0.919	1
Zfyve16	0.000841637	0.329511	0.385	0.097	1
Top2a	0.000843153	1.44552	0.282	0.048	1
Ccar1	0.000852378	0.466832	0.564	0.21	1
Arntl	0.000852613	0.553601	0.359	0.081	1
Cbll1	0.000852613	0.369743	0.359	0.081	1
Cdca3	0.0008597	0.605846	0.256	0.032	1
1700019D03Rik	0.000861587	0.485236	0.59	0.226	1
Sec63	0.000865588	0.694666	0.641	0.306	1
Dock10	0.000898857	0.317503	0.256	0.032	1
Dip2c	0.000901135	0.337203	0.333	0.081	1
Ubap2l	0.000912904	0.473973	0.821	0.435	1
Med1	0.000912977	0.336768	0.59	0.226	1
Daglb	0.000913877	-1.36728	0.256	0.532	1
Dcaf13	0.000917536	0.354481	0.359	0.081	1
Frmd6	0.000918743	0.687335	0.59	0.242	1
Smc1a	0.000928626	0.652554	0.718	0.371	1
Zfp318	0.000939661	0.295991	0.256	0.032	1
Sun1	0.000968957	0.306836	0.385	0.097	1
Ncoa6	0.000982175	0.360717	0.256	0.032	1
Scaf11	0.000982713	0.621357	0.795	0.419	1
Fam129c	0.000987014	0.504776	0.359	0.081	1
Fam193b	0.00100346	0.343886	0.385	0.097	1
Dpt	0.00101132	0.925788	0.872	0.71	1
Usp7	0.00101389	0.483792	0.538	0.21	1
Cd47	0.00101537	0.526204	1	0.774	1
Eif4g3	0.00102526	0.331108	0.641	0.258	1
Samd4	0.00102647	0.32242	0.256	0.032	1
Rasa1	0.0010391	0.39691	0.385	0.097	1
Dpy19l1	0.00104038	0.394578	0.513	0.177	1
Zfhx4	0.00104726	0.48014	0.872	0.516	1
Six1	0.00105265	0.324177	0.436	0.113	1
Gng5	0.001055	-0.628795	0.897	0.952	1
Mmgt1	0.00105828	0.264133	0.205	0.016	1
Med7	0.00106134	0.258985	0.359	0.081	1
Ttf1	0.00108097	0.393891	0.282	0.048	1
Dnase2a	0.00108097	0.434379	0.282	0.048	1
Rps14	0.00108339	0.407328	1	0.984	1
Kmt2a	0.00110682	0.605711	0.692	0.371	1
Pfdn5	0.0011091	-0.583462	1	0.903	1
Wdr89	0.00111239	0.25628	0.205	0.016	1
Hist1h1e	0.00111963	0.74205	0.641	0.323	1
Osbpl9	0.00112015	0.396731	0.641	0.242	1
Abcc9	0.00112064	0.932883	0.256	0.032	1
Dmd	0.00112064	0.262197	0.256	0.032	1
Kitl	0.00112219	0.471883	0.462	0.161	1
Exoc6b	0.00112617	0.346734	0.282	0.048	1
Limd1	0.0011509	0.353152	0.513	0.161	1
C2cd5	0.00116905	0.317435	0.205	0.016	1
Psme3	0.00117067	0.260044	0.256	0.032	1
Chst3	0.00117312	0.325336	0.282	0.048	1
Tep1	0.00118257	0.268379	0.359	0.081	1
Pon2	0.00118634	-0.673799	0.128	0.403	1
Ywhaz	0.00119212	0.520232	0.923	0.774	1
Agps	0.00119369	0.289794	0.385	0.097	1
Tpst1	0.0012015	0.353021	0.41	0.113	1
Usp40	0.00122187	0.268377	0.282	0.048	1
Apobec3	0.0012439	0.389327	0.538	0.21	1
Alyref	0.00124515	0.32022	0.718	0.306	1
Anxa2	0.00125008	-0.782766	0.949	0.887	1
Matr3	0.00125581	0.470872	0.692	0.306	1
Iglc1	0.00125709	2.04091	0.333	0.081	1
Fam114a1	0.00129051	0.52722	0.59	0.258	1
Ddr2	0.00129253	0.642643	0.897	0.742	1
Armc8	0.00131492	0.419262	0.359	0.097	1
Cblb	0.00132329	0.427195	0.385	0.097	1
Bcl2l11	0.00132503	0.284007	0.282	0.048	1
Cpne1	0.00132688	0.341834	0.308	0.065	1
Mau2	0.00132688	0.346095	0.308	0.065	1
Baz2a	0.00132688	0.379416	0.308	0.065	1
Rrm1	0.0013272	0.510933	0.41	0.113	1
Gm43462	0.0013554	0.277216	0.205	0.016	1
Hnrnpa3	0.00136357	0.75195	0.872	0.694	1
mt-Nd5	0.00136357	0.542655	0.923	0.661	1
Nop53	0.00136438	0.403588	0.744	0.339	1
Slc30a5	0.00137957	0.352167	0.282	0.048	1
Cdk13	0.0014112	0.39023	0.385	0.113	1
2810403D21Rik	0.00142337	0.286399	0.205	0.016	1
Zfp422	0.00143185	0.326493	0.308	0.065	1
Heg1	0.00143689	0.525399	0.718	0.355	1
Sptan1	0.0014416	0.488946	0.846	0.387	1
Cnot1	0.00147542	0.355807	0.615	0.258	1
Ppox	0.00149447	0.250304	0.205	0.016	1
Sestd1	0.00150612	0.28704	0.538	0.177	1
Tifa	0.00150706	0.584936	0.333	0.081	1
Xpo6	0.00151487	0.305582	0.436	0.129	1
Ablim1	0.00151589	0.535031	0.744	0.452	1
Colgalt1	0.00152679	0.403567	0.462	0.161	1
Gbp7	0.00154436	0.358501	0.487	0.161	1
Eif5b	0.00155233	0.496004	0.692	0.371	1
Fibin	0.00155586	-0.576612	0	0.226	1
Sc5d	0.00156395	0.313794	0.41	0.113	1
Cdk1	0.00156883	0.335935	0.205	0.016	1
Ptbp3	0.0015792	0.48429	0.769	0.419	1
Dtl	0.00158727	0.274914	0.154	0	1
Tspan33	0.00158727	0.295083	0.154	0	1
Ercc2	0.00158727	0.302191	0.154	0	1
2200002D01Rik	0.00158727	0.282684	0.154	0	1
Eaf2	0.00158727	0.270346	0.154	0	1
Alas2	0.00158727	0.489712	0.154	0	1
Slc12a6	0.00160058	0.354028	0.513	0.161	1
Rnaseh2b	0.00160372	0.279062	0.308	0.065	1
Zfp638	0.00161552	0.570047	0.615	0.306	1
Abca6	0.00161574	0.258499	0.41	0.113	1
Pcsk6	0.00162225	0.712838	0.692	0.435	1
Rfx7	0.00162226	0.406072	0.385	0.097	1
Polr1d	0.00163503	-0.602962	0.744	0.774	1
Fus	0.00163886	0.594891	0.846	0.565	1
Serf2	0.00165596	-0.512692	0.974	0.984	1
Set	0.00165883	0.553508	0.872	0.548	1
Sfswap	0.00166041	0.488335	0.436	0.145	1
Pan3	0.00166041	0.270313	0.436	0.145	1
Iws1	0.00166041	0.417815	0.436	0.145	1
Pdlim1	0.00166511	0.386783	0.308	0.065	1
Ciao1	0.00168467	0.290101	0.282	0.048	1
Serinc5	0.00172865	0.408449	0.308	0.065	1
Lamc1	0.00173084	0.638494	0.846	0.548	1
Ace	0.00174777	0.421803	0.718	0.339	1
Abca8a	0.00174907	0.444097	0.564	0.21	1
Rbbp8	0.00179441	0.293232	0.308	0.065	1
Atp2b1	0.00181844	0.41842	0.846	0.484	1
Ifi209	0.00182322	0.340558	0.282	0.048	1
Polb	0.00183014	0.456885	0.462	0.161	1
Adipor2	0.00183897	0.346407	0.385	0.113	1
Sart3	0.0018399	0.291931	0.231	0.032	1
Kctd17	0.0018399	0.401193	0.231	0.032	1
Trim24	0.00186716	0.484697	0.333	0.081	1
Atp5l	0.00188566	-0.528657	0.949	0.952	1
Eri1	0.00190011	0.445967	0.385	0.113	1
Pdzd8	0.00190231	0.346222	0.487	0.161	1
Trio	0.0019032	0.442845	0.718	0.355	1
Cbx5	0.00191428	0.311995	0.718	0.323	1
Dot1l	0.00192199	0.256209	0.231	0.032	1
Eif2a	0.001952	0.40189	0.513	0.194	1
Adamts12	0.00195925	0.374315	0.487	0.161	1
Ndufs7	0.00197065	-0.856009	0.59	0.677	1
Bclaf1	0.00197387	0.392362	0.769	0.355	1
Myo9a	0.00199587	0.360026	0.564	0.226	1
Fubp1	0.00200077	0.496217	0.641	0.323	1
Kat6a	0.00200245	0.390282	0.59	0.242	1
Rps27rt	0.00200839	0.378016	0.513	0.194	1
Gap43	0.00203553	0.555098	0.436	0.161	1
Tcp1	0.00203914	0.534063	0.641	0.306	1
Cnp	0.00206216	0.581663	0.462	0.161	1
Rpl11	0.00207285	-0.541097	1	1	1
Lama2	0.00207478	0.532822	0.744	0.371	1
Clspn	0.00209634	0.469974	0.231	0.032	1
Tars	0.00213749	0.305628	0.41	0.129	1
AW549877	0.00215949	0.410174	0.359	0.097	1
Knl1	0.00218885	0.530276	0.231	0.032	1
Mthfsd	0.00218885	0.287404	0.231	0.032	1
Vps13d	0.0022259	0.2781	0.333	0.081	1
Glt8d2	0.00227225	0.292397	0.436	0.129	1
Vgll4	0.0022752	0.29993	0.41	0.129	1
Lysmd3	0.00230735	0.384876	0.41	0.145	1
G3bp1	0.00231935	0.542426	0.641	0.306	1
Plekhf2	0.00232308	0.295659	0.308	0.065	1
Myl4	0.00232836	0.793561	0.256	0.048	1
Smarcb1	0.00235185	0.308552	0.59	0.242	1
Zfp36l1	0.00236643	0.484948	0.897	0.661	1
Cd79b	0.00237933	0.640784	0.513	0.194	1
Stmn1	0.00238309	0.55112	0.385	0.113	1
Hebp1	0.00238631	0.373902	0.333	0.081	1
Ndufb11	0.00239963	-0.570165	0.846	0.855	1
Junb	0.00240732	-1.20541	0.718	0.806	1
Chd6	0.002421	0.417725	0.41	0.129	1
Rps2	0.00243936	-0.533325	1	0.984	1
Mga	0.00244743	0.492536	0.564	0.258	1
Tardbp	0.00248066	0.395067	0.564	0.226	1
Col6a2	0.00248237	0.721968	0.949	0.677	1
Irf2bp2	0.00248663	0.440838	0.667	0.371	1
Mcm5	0.00248929	0.361249	0.231	0.032	1
Ufsp2	0.0025085	0.50974	0.436	0.161	1
Egfr	0.00251617	0.291499	0.538	0.21	1
Mef2c	0.00252835	0.339826	0.692	0.323	1
Efhd1	0.00253452	0.513397	0.59	0.258	1
Pcmtd2	0.0025753	0.350854	0.41	0.129	1
Col6a6	0.00258373	0.401697	0.436	0.161	1
Ifi207	0.00258834	0.334356	0.615	0.274	1
Ankrd16	0.00259754	0.300296	0.231	0.032	1
Ctbp1	0.00260188	0.334143	0.59	0.258	1
Ppp1r12b	0.0026225	0.37612	0.256	0.048	1
Stom	0.0026225	0.340531	0.256	0.048	1
Nnmt	0.00263435	0.575136	0.308	0.081	1
Blzf1	0.00265574	0.347993	0.282	0.065	1
Ubc	0.00266808	-0.869153	0.949	0.903	1
Phc3	0.00268038	0.314659	0.359	0.097	1
Sp3	0.0027242	0.439902	0.615	0.29	1
Bcl9l	0.00272862	0.455877	0.308	0.081	1
Naa10	0.00273854	0.313605	0.41	0.129	1
Ptprg	0.00273929	0.313334	0.333	0.081	1
Hist1h1b	0.00279428	0.648453	0.385	0.113	1
Uqcrq	0.00280748	-0.61563	0.692	0.806	1
Dlc1	0.00281417	0.525851	0.513	0.21	1
Gtf3c2	0.00283469	0.304113	0.333	0.081	1
Ppic	0.00284267	0.424901	0.795	0.435	1
Cog4	0.00285946	0.304001	0.282	0.065	1
Gadd45b	0.00287793	-1.1369	0.128	0.419	1
Cpsf7	0.00288391	0.297548	0.385	0.113	1
Mecp2	0.00288391	0.2668	0.385	0.113	1
Xiap	0.00291252	0.435586	0.564	0.226	1
Stag1	0.00292575	0.587686	0.564	0.274	1
Selenom	0.00294059	-0.914788	0.846	0.839	1
Crem	0.00295025	0.324415	0.256	0.048	1
Prdx1	0.00295937	-0.847448	0.846	0.871	1
Clip4	0.00297616	0.304101	0.385	0.113	1
Ppp1cb	0.00300255	0.409669	0.692	0.339	1
Apbb2	0.00300566	0.4498	0.615	0.306	1
Bmp4	0.00303022	0.351686	0.308	0.081	1
Hist1h1d	0.00306754	0.655866	0.256	0.048	1
Dgcr8	0.00307735	0.319122	0.282	0.065	1
Rab5a	0.00309359	0.322106	0.641	0.274	1
Sec24a	0.00309371	0.255999	0.41	0.129	1
Nktr	0.00310449	0.478089	0.846	0.565	1
Tpx2	0.00311062	0.631122	0.179	0.016	1
Kmt2c	0.00312149	0.361898	0.667	0.339	1
Akap13	0.00318018	0.381625	0.821	0.548	1
Pla2r1	0.00318907	0.287506	0.256	0.048	1
Cplx2	0.00318907	0.418852	0.256	0.048	1
Gmnn	0.00319188	0.462216	0.282	0.065	1
Cdk7	0.00319188	0.301555	0.282	0.065	1
Gmfb	0.00319305	0.262124	0.462	0.161	1
Eif3e	0.0032106	0.601387	0.769	0.468	1
Chtop	0.00323743	0.34272	0.564	0.226	1
Ddhd1	0.00324739	0.252401	0.333	0.081	1
Kif15	0.00326422	0.280751	0.179	0.016	1
Rpl30	0.00328122	-0.501086	1	0.984	1
Ppp1r21	0.00331028	0.306515	0.282	0.065	1
Tug1	0.00333981	0.293666	0.615	0.258	1
N4bp2	0.00337272	0.288135	0.385	0.113	1
Gusb	0.00337272	0.344509	0.385	0.113	1
Prpf19	0.00337534	0.268472	0.487	0.177	1
Pcdh19	0.00338055	0.35217	0.462	0.161	1
Rev1	0.00344539	0.283515	0.256	0.048	1
Setbp1	0.00344539	0.37433	0.256	0.048	1
Hint1	0.0034564	-0.696019	0.846	0.855	1
Zyg11b	0.00349616	0.505401	0.385	0.129	1
Purb	0.00349616	0.530729	0.769	0.435	1
Crip2	0.00349633	0.415856	0.538	0.226	1
Setd5	0.0035678	0.287904	0.487	0.177	1
Gtpbp4	0.00358853	0.250558	0.385	0.113	1
Eif1	0.00358911	-0.352151	1	1	1
Ccnd2	0.00358962	0.522999	0.538	0.226	1
Erbin	0.00359505	0.324722	0.564	0.226	1
Lrif1	0.00360348	0.381701	0.359	0.113	1
Arl5c	0.00360348	0.514714	0.359	0.113	1
Mrpl49	0.00360348	0.493043	0.359	0.113	1
Smdt1	0.00363407	-0.571816	0.821	0.903	1
Atxn10	0.00365683	-0.758358	0.436	0.613	1
Pias1	0.003662	0.442971	0.436	0.161	1
Angptl2	0.00368763	0.384671	0.615	0.29	1
Ppm1g	0.00368828	0.25235	0.513	0.21	1
Antxr2	0.00369161	0.474492	0.769	0.468	1
9930021J03Rik	0.00370108	0.271751	0.385	0.113	1
Pax5	0.00371853	0.785136	0.359	0.113	1
Vangl1	0.0037264	0.329165	0.308	0.081	1
Mrpl11	0.0037291	0.421536	0.41	0.145	1
mt-Nd4	0.00375069	0.36974	1	0.919	1
Snhg11	0.00375101	-0.496604	0	0.194	1
Sox6	0.00376737	0.268956	0.179	0.016	1
Dbr1	0.00376737	0.258597	0.179	0.016	1
Gclm	0.00378805	0.349005	0.513	0.21	1
Cpsf2	0.00378805	0.343161	0.513	0.21	1
Jak1	0.00379862	0.451975	0.872	0.71	1
Ms4a4d	0.00385119	0.492514	0.333	0.097	1
Zfp84	0.00385565	0.302361	0.308	0.081	1
Srek1ip1	0.00385565	0.379799	0.308	0.081	1
Fbxo30	0.00386514	0.308339	0.256	0.048	1
Zfp260	0.00388645	0.334406	0.564	0.226	1
Prpf6	0.00393251	0.419168	0.436	0.161	1
Sh3pxd2a	0.00393288	0.361235	0.41	0.129	1
Gmps	0.00394681	0.383126	0.385	0.129	1
Ccna2	0.00395015	0.321173	0.179	0.016	1
Cdc14b	0.00396449	0.321281	0.282	0.065	1
Rnaset2a	0.00398298	-0.656433	0.154	0.387	1
Csde1	0.00401068	0.528494	0.846	0.597	1
Rabepk	0.00401506	0.282137	0.256	0.048	1
Atp6v1f	0.00402216	-0.585608	0.795	0.823	1
Ube2c	0.0040604	1.01098	0.205	0.032	1
Adam15	0.00407121	0.459324	0.41	0.145	1
Opcml	0.00410058	0.66595	0.59	0.323	1
Gstm1	0.00410755	0.50581	0.872	0.597	1
Atr	0.00410941	0.358881	0.333	0.097	1
Ext1	0.00411995	0.394685	0.641	0.306	1
Ltbp1	0.00411995	0.402215	0.641	0.306	1
Tril	0.00412644	0.341914	0.308	0.081	1
Ngdn	0.00412644	0.259629	0.308	0.081	1
Ermap	0.00414358	0.401757	0.128	0	1
Rassf4	0.00414358	0.43174	0.128	0	1
Kif18b	0.00414358	0.264758	0.128	0	1
Cenpk	0.00414358	0.330214	0.128	0	1
Hdgf	0.00415946	0.459776	0.692	0.371	1
Dusp2	0.00417025	0.285795	0.256	0.048	1
Magt1	0.00417726	0.566675	0.718	0.403	1
Gm37494	0.00418409	0.250576	0.385	0.113	1
Atf2	0.00418721	0.292206	0.436	0.145	1
Wipi1	0.00419915	0.330625	0.564	0.226	1
Nfat5	0.00422426	0.6586	0.462	0.21	1
Map4k4	0.00423286	0.4715	0.641	0.339	1
Car2	0.00423678	1.92115	0.205	0.032	1
Kat2b	0.00429752	0.270318	0.41	0.129	1
Rbpms	0.00430861	0.306812	0.538	0.226	1
Gga2	0.00434546	0.314619	0.359	0.113	1
Cerk	0.00434546	0.420527	0.359	0.113	1
Stard9	0.00438323	0.312823	0.333	0.097	1
Ctnnal1	0.00441132	0.257044	0.282	0.065	1
Atl3	0.00443995	0.257462	0.513	0.21	1
Rassf8	0.00446611	0.347041	0.436	0.161	1
Dhx9	0.00453011	0.290079	0.462	0.177	1
Pdhb	0.00457164	0.372026	0.41	0.145	1
Slc38a1	0.004622	0.369487	0.359	0.113	1
Sod2	0.00464404	0.271522	0.538	0.21	1
Itpr2	0.0046735	0.263029	0.333	0.097	1
Lama4	0.00468063	0.554454	0.692	0.435	1
Ilf3	0.00469283	0.32887	0.436	0.145	1
Med13l	0.00470212	0.354479	0.487	0.194	1
Foxd1	0.00471351	-1.18356	0.026	0.242	1
Chmp7	0.0047204	0.266221	0.308	0.081	1
Stt3b	0.00477135	0.446826	0.641	0.323	1
Cst3	0.00477303	-0.973777	0.949	0.919	1
Cdc5l	0.00479792	0.378258	0.59	0.258	1
Atp2a3	0.00480841	0.285946	0.205	0.032	1
F830016B08Rik	0.00480841	0.251238	0.205	0.032	1
Sash3	0.00480841	0.278766	0.205	0.032	1
G3bp2	0.00483286	0.382195	0.615	0.29	1
Sec31a	0.00488088	0.313558	0.718	0.339	1
Dpp4	0.00488888	0.522458	0.872	0.565	1
Ypel3	0.00491572	-0.788982	0.795	0.742	1
Ncor1	0.00496045	0.404499	0.897	0.597	1
Aak1	0.00498106	0.353229	0.333	0.097	1
Tipin	0.00498283	0.391827	0.41	0.145	1
Birc5	0.00501393	0.732285	0.205	0.032	1
Cpox	0.00501393	0.496161	0.205	0.032	1
Gdi2	0.00501525	0.487634	0.872	0.613	1
Tcerg1	0.00505138	0.263571	0.462	0.177	1
Postn	0.00508277	0.879224	0.718	0.452	1
Huwe1	0.00508547	0.437912	0.667	0.355	1
Dido1	0.00512018	0.273467	0.41	0.129	1
Chd8	0.00512715	0.327748	0.41	0.145	1
Tra2a	0.00514692	0.399468	0.744	0.371	1
Gigyf1	0.00515583	0.271382	0.538	0.226	1
Khsrp	0.00515943	0.337754	0.385	0.129	1
Klhl6	0.00522115	0.37714	0.282	0.081	1
Syt11	0.00522736	0.363484	0.205	0.032	1
Slc35a3	0.00522736	0.292406	0.205	0.032	1
Sacs	0.00522736	0.26316	0.205	0.032	1
Arsk	0.00527036	0.27882	0.41	0.129	1
Btf3	0.00531474	-0.447764	0.949	0.903	1
Gpbp1	0.00532472	0.477967	0.692	0.387	1
Hnrnpul1	0.00532828	0.260522	0.692	0.339	1
Knop1	0.00547092	0.310758	0.385	0.129	1
Cdr2	0.00553295	0.302104	0.231	0.048	1
Heca	0.00555906	0.306911	0.513	0.226	1
Rps27	0.0055597	0.295388	0.974	1	1
Ptges3	0.00556114	0.412729	0.872	0.548	1
Zfp740	0.0055712	0.26047	0.308	0.081	1
Col14a1	0.00558529	0.426191	0.897	0.726	1
5031425E22Rik	0.00563295	0.359524	0.385	0.129	1
Parp8	0.00565167	0.266734	0.333	0.097	1
Pclaf	0.00567901	0.840084	0.205	0.032	1
Rps21	0.00568002	0.344871	1	1	1
Pafah1b3	0.00585024	0.502506	0.538	0.226	1
Vangl2	0.00591778	0.31561	0.205	0.032	1
Spc25	0.00591778	0.269627	0.205	0.032	1
Smc4	0.00596153	0.382913	0.462	0.21	1
Tm9sf3	0.00596646	0.347322	0.923	0.565	1
Slc43a3	0.00598238	0.445939	0.718	0.435	1
Pde3a	0.00601663	0.323776	0.333	0.097	1
Gm42418	0.0060552	0.897209	1	1	1	excluded
Cd79a	0.00605717	0.492087	0.513	0.21	1
Ankib1	0.00607524	0.322106	0.41	0.145	1
Pik3ca	0.00611873	0.442319	0.462	0.21	1
Hbb-bs	0.00614362	6.06914	0.59	0.306	1
Arglu1	0.00618324	0.410167	0.641	0.306	1
Stip1	0.00625803	0.340478	0.385	0.145	1
Ppfia1	0.00625853	0.275256	0.359	0.113	1
Mbtd1	0.00625853	0.288133	0.359	0.113	1
Trpm7	0.0062858	0.322939	0.538	0.242	1
Rtraf	0.00640818	-0.732252	0.538	0.645	1
Dhfr	0.00642265	0.250138	0.205	0.032	1
Atg13	0.006438	0.273389	0.231	0.048	1
Adgrg2	0.006438	0.270767	0.231	0.048	1
Rpl22l1	0.00644388	-0.639324	0.949	0.919	1
Riok2	0.00647252	0.290337	0.256	0.065	1
Cul3	0.00660056	0.401724	0.718	0.355	1
Eif4g2	0.00664098	-0.531611	0.846	0.855	1
Wdr43	0.0066993	0.334739	0.385	0.129	1
Mtmr6	0.00673229	0.29898	0.436	0.177	1
Creb3l1	0.00674545	0.373255	0.564	0.258	1
Arl4d	0.00677593	0.295558	0.462	0.177	1
Znhit1	0.00677658	0.367657	0.641	0.29	1
Ldha	0.0067804	-0.601471	0.667	0.71	1
Zfr	0.00681982	0.363163	0.59	0.274	1
Hnrnpd	0.00684663	0.451866	0.795	0.468	1
Impad1	0.00687517	0.405576	0.513	0.21	1
Hba-a2	0.00687555	4.39358	0.308	0.097	1
Mat2a	0.00690468	0.418286	0.692	0.371	1
Med21	0.00691393	0.299623	0.59	0.258	1
Gys1	0.00693871	0.305308	0.231	0.048	1
Agfg2	0.00694211	0.348846	0.256	0.065	1
Camk2d	0.00706141	0.457704	0.692	0.371	1
Casp8ap2	0.0070949	0.38735	0.308	0.097	1
Rbm22	0.0071075	0.281043	0.564	0.226	1
Slc38a9	0.0071882	0.274202	0.256	0.065	1
Dvl3	0.0071882	0.284899	0.256	0.065	1
Psmd11	0.00728701	0.29615	0.692	0.355	1
Pou2af1	0.0072896	0.324816	0.282	0.081	1
Med15	0.00729777	0.269231	0.385	0.129	1
Gpalpp1	0.00731783	0.283019	0.436	0.161	1
Cbx6	0.00731783	0.258365	0.436	0.161	1
Fnbp4	0.00732051	0.266958	0.308	0.097	1
Dst	0.00733821	0.458761	0.564	0.258	1
Ubac1	0.0073531	0.435999	0.359	0.129	1
Itpripl2	0.00741397	0.287191	0.641	0.274	1
Mcm7	0.00744209	0.407366	0.256	0.065	1
Smg1	0.00751501	0.320853	0.564	0.274	1
Tek	0.00751589	0.404753	0.538	0.274	1
Zbtb38	0.00752383	0.266157	0.462	0.177	1
Desi1	0.00753239	0.377966	0.282	0.081	1
Lpar4	0.00755344	0.388855	0.333	0.113	1
Eif3j1	0.00756808	0.364672	0.359	0.129	1
Hnrnpu	0.0075712	0.489706	0.846	0.548	1
1810037I17Rik	0.0076146	-0.551549	0.692	0.742	1
Lrmp	0.00761866	0.420427	0.385	0.145	1
Hist1h2bc	0.00769838	-0.98742	0.308	0.5	1
Osbpl2	0.00778241	0.263948	0.282	0.081	1
Glcci1	0.00778241	0.32671	0.282	0.081	1
Atp5a1	0.00786307	0.391683	0.897	0.565	1
Fzd2	0.00800925	0.296496	0.487	0.194	1
Virma	0.0080106	0.293406	0.41	0.145	1
Nelfa	0.00803984	0.362144	0.282	0.081	1
Pcbp1	0.00808612	0.371407	0.872	0.5	1
Wnt5a	0.00814832	0.408265	0.41	0.161	1
Phykpl	0.00815234	0.285442	0.154	0.016	1
Grk5	0.00815234	0.26786	0.154	0.016	1
Rsrp1	0.00816761	0.362908	0.923	0.71	1
Ndufa3	0.00821461	0.266957	0.846	0.5	1
Ubl5	0.00824567	-0.603051	0.923	0.871	1
Prc1	0.00825271	0.361334	0.256	0.065	1
Snrnp27	0.00828722	0.379264	0.59	0.29	1
Pkd2	0.00830611	0.435677	0.667	0.323	1
Trappc4	0.00830611	-0.710005	0.359	0.516	1
Rad21	0.00834502	0.601206	0.59	0.339	1
Atp2b4	0.00834684	0.353459	0.231	0.048	1
Sema5a	0.00834684	0.270266	0.231	0.048	1
Col12a1	0.00836959	-1.52516	0.128	0.339	1
Mafg	0.00836959	0.304994	0.41	0.161	1
Col6a1	0.00838976	0.473402	0.949	0.823	1
Ccnl1	0.00843477	0.271838	0.692	0.371	1
Cs	0.00845824	0.275029	0.41	0.145	1
Gcc2	0.00846749	0.312884	0.538	0.226	1
Copa	0.00847595	0.407196	0.795	0.484	1
Erlin2	0.00848542	0.327982	0.359	0.129	1
Ctse	0.0085422	0.613998	0.154	0.016	1
Rnf20	0.00856075	0.351086	0.462	0.194	1
Gstm2	0.00862404	0.268186	0.538	0.242	1
Rps27a	0.00863447	-0.347875	1	1	1
2310022B05Rik	0.00869034	0.292924	0.41	0.145	1
Rc3h2	0.00870284	0.290881	0.513	0.226	1
Arrdc3	0.00870284	0.56013	0.513	0.226	1
Irak1	0.00870284	0.277086	0.513	0.226	1
Klhl24	0.00873182	0.558805	0.59	0.339	1
Tubb4b	0.00877161	0.657068	0.667	0.435	1
Cox8a	0.00881227	-0.371938	0.974	0.968	1
Fmod	0.00881449	-1.17436	0.051	0.258	1
Stam	0.00881449	0.295737	0.308	0.097	1
Specc1	0.00883613	0.282209	0.256	0.065	1
Mmp2	0.00893777	0.361445	0.949	0.839	1
Hmmr	0.00894865	0.392235	0.154	0.016	1
Cdkn3	0.00894865	0.275622	0.154	0.016	1
Tmem108	0.00897822	0.273416	0.231	0.048	1
Hist1h1a	0.00897822	0.323531	0.231	0.048	1
Tpm2	0.00902091	-1.07055	0.077	0.274	1
Ankrd40	0.00904407	0.309763	0.436	0.161	1
Dusp22	0.0090884	0.268012	0.308	0.097	1
Zmiz1	0.00912067	0.316623	0.615	0.29	1
Narf	0.00914746	0.251127	0.282	0.081	1
Ptpn11	0.00924589	0.276585	0.59	0.274	1
Chrdl1	0.00926192	0.347535	0.769	0.532	1
Gpatch8	0.00928129	0.315296	0.564	0.274	1
Cep164	0.00928883	0.250102	0.333	0.113	1
Kansl1	0.0093705	0.254568	0.487	0.226	1
Tacc3	0.00937228	0.293266	0.154	0.016	1
Fbxo5	0.00937228	0.266574	0.154	0.016	1
Oga	0.00951253	0.414046	0.59	0.29	1
Ppme1	0.00965912	0.310822	0.308	0.097	1
Nck1	0.0096808	0.322578	0.59	0.274	1
Ndst1	0.00974044	0.374131	0.538	0.274	1
Rab10	0.00982743	0.389997	0.692	0.371	1
Nceh1	0.00984607	0.412009	0.333	0.113	1
Fam120b	0.00995629	0.267242	0.308	0.097	1
Dgkd	0.00995728	0.307345	0.462	0.194	1
Lsp1	0.00997226	0.459035	0.846	0.581	1
Tmem63a	0.00997855	0.266291	0.359	0.113	1
Clic1	0.0100785	-0.669101	0.872	0.871	1
Lars2	0.01011	0.643345	0.974	0.839	1
Ly6a	0.0101269	0.39162	0.897	0.645	1
Fam76a	0.0102088	0.33783	0.462	0.194	1
Ppp1r15b	0.0102185	0.357547	0.436	0.177	1
Dek	0.0102299	0.866615	0.744	0.435	1
Serinc3	0.0102438	0.311135	0.821	0.565	1
Cdon	0.0103671	0.352723	0.692	0.355	1
Reep3	0.0104832	0.448562	0.769	0.468	1
Mrpl30	0.0104834	-0.522236	0.487	0.645	1
Galnt1	0.0105253	0.466197	0.744	0.387	1
Cpsf6	0.010535	0.278143	0.615	0.274	1
Chordc1	0.0105666	0.335061	0.538	0.258	1
Col6a5	0.0105752	-0.678615	0.051	0.258	1
Wbp4	0.0106057	0.273477	0.59	0.274	1
Itga4	0.0106203	0.449416	0.385	0.161	1
Hnrnph2	0.0106821	0.46998	0.59	0.306	1
Wwtr1	0.0107587	0.311528	0.462	0.177	1
Rgs16	0.0107901	0.706625	0.103	0	1
Ccne2	0.0107901	0.384101	0.103	0	1
Rhd	0.0107901	0.631006	0.103	0	1
Snca	0.0107901	0.434448	0.103	0	1
Gypa	0.0107901	0.818582	0.103	0	1
Epyc	0.0107901	0.357578	0.103	0	1
Scimp	0.0107901	0.352674	0.103	0	1
Slc4a1	0.0107901	0.623034	0.103	0	1
Cenph	0.0107901	0.330597	0.103	0	1
Fyn	0.0108652	0.377491	0.718	0.403	1
Zkscan3	0.010896	0.306544	0.41	0.161	1
Tle4	0.0108973	0.250487	0.308	0.097	1
2610002M06Rik	0.0108973	0.253959	0.308	0.097	1
Dpep1	0.0109155	0.424002	0.821	0.581	1
Stk25	0.0109227	0.256727	0.538	0.242	1
Pcmtd1	0.010933	0.305974	0.564	0.258	1
Serpinh1	0.0109983	0.336718	1	0.903	1
Tbl1x	0.0110047	0.432617	0.615	0.339	1
Atxn7l3b	0.0110504	0.366193	0.846	0.613	1
Rbms3	0.0111596	0.369573	0.615	0.323	1
Mcm3	0.0112915	0.441167	0.179	0.032	1
Rrm2	0.0112915	0.75311	0.179	0.032	1
Psd3	0.0113097	0.256811	0.436	0.177	1
Rtcb	0.0113097	0.330959	0.436	0.177	1
Serinc1	0.0113676	0.338706	0.872	0.548	1
Cct8	0.0113695	0.339179	0.667	0.339	1
Pmm1	0.011457	-0.673794	0.256	0.435	1
Arpc1b	0.0116137	-0.562827	0.846	0.903	1
Ttc5	0.0117007	0.284879	0.333	0.113	1
Ccnb2	0.0117544	0.351185	0.179	0.032	1
Mylip	0.0117847	0.392437	0.564	0.306	1
Matn2	0.0118403	-0.612429	0.179	0.371	1
Mcm6	0.0119198	0.439952	0.256	0.081	1
Map1lc3b	0.0120828	-0.484361	0.872	0.887	1
Ankrd11	0.0121191	0.403762	0.769	0.452	1
Eef1d	0.012151	-0.671217	0.846	0.806	1
Cox6b1	0.0121604	-0.392822	0.872	0.855	1
Dag1	0.0121721	0.450532	0.641	0.403	1
Celf1	0.0122089	0.401072	0.564	0.274	1
Cox7b	0.0122091	0.398803	0.872	0.613	1
Irs1	0.0123418	0.250153	0.256	0.065	1
Cbx1	0.0123757	0.50718	0.692	0.403	1
Siglecg	0.0123844	0.334149	0.333	0.113	1
Clec11a	0.0123844	-1.06402	0.077	0.274	1
Sf3b1	0.0125712	0.447641	0.821	0.581	1
Arf5	0.0126338	-0.275698	0.974	0.919	1
Prkca	0.0126431	0.276994	0.436	0.194	1
Enah	0.0127184	0.287612	0.41	0.161	1
Mcm2	0.0127311	0.29746	0.179	0.032	1
Esco2	0.0127311	0.356865	0.179	0.032	1
Rplp2	0.0127624	0.349091	1	0.919	1
Tm9sf4	0.0127941	0.308589	0.487	0.226	1
2810001G20Rik	0.0128686	-0.322295	0.026	0.194	1
Map3k1	0.0130228	0.404411	0.333	0.129	1
Dock7	0.0130581	0.308325	0.564	0.274	1
Dnajc9	0.0133833	0.303025	0.41	0.161	1
Ppp1r10	0.0134346	0.438115	0.462	0.226	1
Fam171a2	0.0135101	-0.321515	0	0.145	1
Lamb1	0.0135207	0.398858	0.667	0.387	1
Zfp704	0.0135903	0.288162	0.359	0.129	1
Rhoa	0.0136118	-0.491944	0.846	0.919	1
Sike1	0.0136988	0.317652	0.462	0.194	1
Tgfb1	0.0137271	0.271255	0.41	0.161	1
Cd2	0.013779	0.345601	0.179	0.032	1
Tmem131l	0.0137827	0.472516	0.385	0.161	1
Pcmt1	0.013869	0.252738	0.59	0.274	1
Mdh2	0.0138864	-0.563319	0.641	0.694	1
Larp4b	0.0139592	0.334952	0.564	0.274	1
Klhdc2	0.0140502	0.337807	0.487	0.226	1
Ubb	0.0140738	-0.850156	0.974	0.952	1
Rplp1	0.0142138	0.277357	1	1	1
Top2b	0.0142187	0.311761	0.821	0.5	1
Sfpq	0.0142517	0.28657	0.795	0.452	1
Steap3	0.0144556	0.29211	0.744	0.403	1
Rb1	0.0144822	0.280796	0.308	0.113	1
Agtrap	0.0146405	0.377618	0.513	0.226	1
Rbfox2	0.0146405	0.289496	0.513	0.226	1
Hmgcr	0.0146526	0.27901	0.333	0.113	1
Vcpip1	0.0147306	0.254641	0.359	0.129	1
Zswim6	0.0147782	0.299845	0.205	0.048	1
Aebp2	0.0148981	0.297129	0.385	0.145	1
Hist1h3c	0.0149023	0.366621	0.179	0.032	1
Ctcf	0.0149104	0.438566	0.667	0.419	1
Vars	0.01498	0.339897	0.513	0.226	1
Add1	0.0150137	0.344812	0.641	0.371	1
Zic4	0.0150615	-0.592158	0.051	0.226	1
Gpx1	0.0151048	0.872707	0.923	0.726	1
Lztfl1	0.015108	0.274088	0.487	0.21	1
Timm10	0.0152055	-0.410104	0.026	0.194	1
Zadh2	0.0152873	0.299221	0.385	0.145	1
Calu	0.0153621	0.510402	0.872	0.661	1
Ccdc50	0.0154898	0.296135	0.692	0.355	1
Polr2j	0.0155012	0.31301	0.59	0.29	1
Ino80d	0.0156125	0.375906	0.41	0.177	1
St3gal2	0.0156443	0.32944	0.615	0.306	1
Ppp3ca	0.0156504	0.378433	0.667	0.371	1
Kif1b	0.0156666	0.367123	0.538	0.274	1
Nenf	0.0157045	-0.604098	0.795	0.855	1
Scara3	0.0157188	0.427144	0.769	0.484	1
Cflar	0.0158113	0.276076	0.59	0.274	1
Cenpf	0.0158665	0.477856	0.205	0.048	1
Zeb2	0.0159078	0.420006	0.872	0.532	1
Thbs1	0.0159154	-0.633262	0.282	0.565	1
Pdcd6ip	0.0159154	0.333908	0.667	0.323	1
Tmem176a	0.0159845	-1.20236	0.077	0.258	1
Ppp1cc	0.0162396	0.26609	0.667	0.403	1
Fis1	0.0164071	-0.481838	0.692	0.71	1
Slc4a1ap	0.0164366	0.251639	0.205	0.048	1
Mthfd2	0.0164366	0.263872	0.205	0.048	1
Fbln5	0.0164527	0.362064	0.513	0.242	1
Gsk3b	0.0165501	0.3574	0.769	0.468	1
Pds5a	0.0165755	0.343276	0.436	0.21	1
Cdkn1c	0.0167143	-0.739176	0.538	0.613	1
Bdh2	0.0167541	0.295473	0.282	0.097	1
Angel2	0.0167679	0.334241	0.462	0.226	1
Msn	0.0168282	0.537321	0.795	0.565	1
Rps6	0.0168747	0.485963	0.974	0.903	1
Acin1	0.0169122	0.351875	0.692	0.387	1
Nr2f1	0.0170246	0.323409	0.205	0.048	1
Adamts2	0.0172258	0.294761	0.795	0.5	1
N4bp2l2	0.0172947	0.303248	0.641	0.339	1
BE692007	0.0173362	0.373299	0.231	0.065	1
Tmf1	0.0174786	0.379926	0.462	0.242	1
Phyh	0.0175904	-0.649135	0.205	0.371	1
Lig1	0.017631	0.259062	0.205	0.048	1
Sspn	0.0177215	0.301002	0.436	0.194	1
Usp39	0.0177566	0.273155	0.282	0.097	1
Uchl1	0.0177838	0.427889	0.436	0.21	1
Ube2v1	0.0178749	0.296777	0.692	0.323	1
Ifitm2	0.0180202	-0.517759	0.974	0.887	1
Nit2	0.0180277	-0.368899	0.051	0.226	1
Safb2	0.01803	0.326492	0.41	0.194	1
Hsp90b1	0.0180366	0.270318	0.974	0.919	1
Tnpo3	0.0181447	0.29469	0.436	0.194	1
Spen	0.0181684	0.375789	0.462	0.226	1
Gem	0.0182773	0.332513	0.282	0.097	1
Rybp	0.0182773	0.278986	0.282	0.097	1
Tuba1a	0.018286	0.49561	0.923	0.774	1
Prdx5	0.0182939	-0.644523	0.872	0.887	1
Ski	0.0183892	0.261929	0.59	0.29	1
Ttyh3	0.0184407	0.306279	0.256	0.081	1
Xpr1	0.0185077	0.262282	0.333	0.129	1
1810026B05Rik	0.0185144	0.297139	0.41	0.177	1
Rap2a	0.0185767	0.336156	0.436	0.194	1
Tnrc6c	0.0185862	0.409999	0.615	0.355	1
Gpx4	0.0187274	-0.366748	0.974	0.919	1
Bmpr2	0.0187605	0.306301	0.59	0.306	1
Tsc22d4	0.0188403	0.391266	0.744	0.452	1
Sdhc	0.0189091	0.257968	0.41	0.194	1
Atp5g2	0.0189333	-0.552698	0.846	0.806	1
Brd3	0.0189803	0.322921	0.564	0.306	1
Gnptg	0.0190177	-0.639566	0.179	0.355	1
Csnk1g3	0.0191317	0.408375	0.538	0.29	1
Auts2	0.019163	-0.936976	0.103	0.29	1
Ggct	0.019294	-0.306959	0.026	0.177	1
Cnn2	0.0193041	-0.546211	0.333	0.516	1
Rbm28	0.0193444	0.296914	0.487	0.226	1
Srsf4	0.0194259	0.307327	0.41	0.177	1
Ngly1	0.019426	-0.419199	0.128	0.339	1
Foxp1	0.0194397	0.525157	0.821	0.5	1
Lamp2	0.0195597	0.338214	0.897	0.629	1
Golim4	0.0195774	0.331666	0.821	0.532	1
Zfand5	0.0198921	0.275451	0.821	0.516	1
Usp3	0.0198929	0.359468	0.462	0.226	1
Nfia	0.0199582	0.432261	0.744	0.468	1
Hdgfl3	0.0200841	0.298579	0.385	0.161	1
Zfp780b	0.0201263	0.292881	0.128	0.016	1
Gm43305	0.0201888	0.265465	0.256	0.081	1
Mier3	0.0202162	0.273356	0.308	0.113	1
Rps6ka3	0.0203262	0.381841	0.59	0.323	1
Zcchc17	0.0203457	0.448789	0.462	0.226	1
Gtf2a2	0.020374	0.295864	0.667	0.371	1
Actg1	0.0203796	-0.543421	1	0.984	1
Tra2b	0.0204249	0.392548	0.564	0.29	1
Ankrd12	0.0204541	0.404999	0.641	0.419	1
Akr1b8	0.0204961	0.255407	0.282	0.097	1
Spry2	0.0204961	0.275015	0.282	0.097	1
Gm973	0.0205518	-0.551894	0	0.129	1
Lrp5	0.0205518	-0.426913	0	0.129	1
Ormdl2	0.020582	0.298678	0.385	0.161	1
Hdgfl2	0.0208665	0.253908	0.41	0.177	1
Snrpb2	0.0209076	0.331567	0.436	0.21	1
Ndufv3	0.0209583	-0.469102	0.846	0.758	1
Reln	0.0210571	0.259246	0.128	0.016	1
Filip1l	0.0213819	0.523619	0.462	0.242	1
Rbms1	0.0214044	0.359487	0.846	0.613	1
Cpeb4	0.0215443	0.309177	0.359	0.145	1
Chd4	0.0215855	0.322149	0.821	0.468	1
Carm1	0.021659	0.268497	0.333	0.129	1
Npc2	0.0217257	-0.651133	0.846	0.855	1
Osbpl8	0.0218608	0.26404	0.436	0.194	1
Fip1l1	0.0218816	0.367128	0.641	0.355	1
Elavl1	0.0218837	0.28632	0.436	0.21	1
Samd4b	0.0219087	0.308413	0.487	0.242	1
Ninj1	0.0219415	-0.540078	0.103	0.274	1
1810059H22Rik	0.0220252	0.327399	0.128	0.016	1
Nxpe2	0.0220252	0.35198	0.128	0.016	1
Trir	0.0220316	0.301834	0.897	0.565	1
Rock2	0.0221399	0.324301	0.897	0.613	1
Rbm39	0.0222055	0.421641	0.923	0.839	1
March5	0.022369	0.279075	0.436	0.194	1
Tnxb	0.022391	0.333834	0.897	0.597	1
Ddx54	0.0225255	0.284993	0.308	0.113	1
Ppp1r12a	0.0229448	0.417998	0.615	0.403	1
Spr	0.0229584	-0.410856	0.077	0.242	1
Stbd1	0.0230317	0.259464	0.128	0.016	1
Plpp3	0.0231318	0.514377	0.923	0.903	1
Marcks	0.0231574	0.471163	1	0.887	1
Armcx3	0.0233446	0.316698	0.41	0.194	1
Hnrnpab	0.0234374	0.320142	0.718	0.5	1
Calr	0.0234584	0.445016	0.897	0.855	1
Rnps1	0.0235348	0.37459	0.385	0.177	1
Clec12a	0.0235971	0.363116	0.282	0.097	1
Ssrp1	0.0236251	0.291759	0.487	0.258	1
Snap47	0.0237051	-0.465111	0.103	0.274	1
Sucla2	0.0237952	0.304979	0.308	0.129	1
Atp5e	0.0237983	-0.374856	0.923	0.935	1
Hypk	0.0239683	-0.576641	0.513	0.565	1
Nme2	0.0240159	-0.746573	0.949	0.919	1
Ier2	0.0241806	-1.04208	0.564	0.758	1
Arnt	0.0245949	0.26834	0.41	0.177	1
Bnip2	0.0246173	0.260161	0.564	0.29	1
Wbp1l	0.0246609	-0.400393	0.308	0.5	1
Ndufs5	0.0248137	-0.466217	0.846	0.774	1
Raph1	0.0248395	0.382437	0.256	0.081	1
Srrm1	0.0248604	0.396119	0.744	0.516	1
Trnt1	0.0249123	0.3229	0.282	0.113	1
Loxl1	0.025046	0.396404	0.872	0.597	1
Cks1b	0.0250536	0.304343	0.436	0.21	1
Engase	0.0259639	0.31831	0.154	0.032	1
Nfib	0.0259763	0.262565	0.795	0.565	1
Atp5j2	0.0260016	-0.294648	0.923	0.887	1
Ppp2ca	0.026339	0.304549	0.692	0.387	1
Ncbp1	0.0263634	0.295824	0.282	0.097	1
Emb	0.0266771	-0.974007	0.256	0.452	1
Apod	0.0267136	-0.283252	0.667	0.387	1
Pdlim4	0.0268172	-0.51859	0.179	0.355	1
Aldoa	0.0269213	-0.568096	0.744	0.742	1
Sema4b	0.026971	0.335778	0.231	0.081	1
Hist1h2ab	0.0269766	0.335905	0.154	0.032	1
Dmxl1	0.0270193	0.325648	0.513	0.258	1
Irf2	0.027223	0.283391	0.769	0.468	1
Setd7	0.0272723	0.308391	0.436	0.226	1
Hist1h4d	0.0273938	0.736586	0.41	0.194	1
Matn4	0.0275763	-0.293358	0.026	0.177	1
Cct5	0.0276493	0.273791	0.821	0.484	1
Araf	0.0277235	0.333731	0.359	0.161	1
Fstl1	0.0279296	0.291919	0.923	0.887	1
Atf7	0.0280191	0.319676	0.41	0.194	1
Zfp101	0.0280232	0.333125	0.154	0.032	1
Asph	0.0282102	0.384043	0.59	0.306	1
Adam17	0.0283451	0.301502	0.487	0.242	1
Tut7	0.0284036	0.262388	0.718	0.435	1
Smc3	0.0284219	0.482056	0.641	0.419	1
Tctex1d2	0.0284894	-0.451104	0.077	0.242	1
Khdrbs1	0.0285256	0.26147	0.692	0.403	1
Ikbkb	0.0286566	0.357236	0.41	0.194	1
Ewsr1	0.0287834	0.264763	0.641	0.323	1
Abi1	0.0287921	0.31039	0.641	0.355	1
Cyfip2	0.0290549	0.321873	0.487	0.274	1
Hells	0.0291046	0.292309	0.154	0.032	1
Rnasek	0.029708	-0.464628	0.718	0.758	1
Igfbp6	0.0297551	-0.660087	0.949	0.903	1
Procr	0.0297799	0.395944	0.513	0.274	1
Ctnna1	0.0297946	0.309648	0.667	0.403	1
Ndufc1	0.029879	-0.489197	0.821	0.742	1
Fcho2	0.0301311	0.291592	0.564	0.29	1
H3f3b	0.0303224	-0.489975	1	0.952	1
Kmt2e	0.0304384	0.283744	0.795	0.484	1
Ldhb	0.0305002	-0.45012	0.103	0.274	1
Antxr1	0.0305843	0.42647	0.718	0.613	1
Eif4ebp2	0.0310557	0.279288	0.436	0.226	1
Tmem176b	0.0311056	-1.14173	0.154	0.323	1
Ftl1	0.0311328	-0.305654	0.974	0.984	1
Pmpca	0.0311949	-0.304145	0	0.113	1
Mpped2	0.0311949	-0.303259	0	0.113	1
Eya2	0.0311949	-0.293572	0	0.113	1
Klhl21	0.0311949	-0.267969	0	0.113	1
Rflna	0.0311949	-0.290866	0	0.113	1
Ptgdr	0.0311949	-0.374506	0	0.113	1
Sorbs3	0.0311949	-0.290709	0	0.113	1
Vps8	0.0311949	-0.261477	0	0.113	1
Stfa2l1	0.0311949	-0.492927	0	0.113	1
Nr2f2	0.0313755	0.654642	0.154	0.032	1
Pde8a	0.0313959	0.274672	0.538	0.29	1
Kdm5b	0.0314737	0.290534	0.487	0.242	1
Ier3ip1	0.0315914	-0.481788	0.718	0.71	1
Fbxo3	0.0316216	0.263391	0.333	0.145	1
Fam76b	0.0316216	0.283675	0.333	0.145	1
Slc41a3	0.0317488	-0.331456	0.026	0.161	1
Guca1a	0.0317488	-0.293262	0.026	0.161	1
Golga4	0.0318218	0.260973	0.385	0.177	1
Rchy1	0.0320351	0.28739	0.41	0.194	1
Acads	0.0322581	0.341679	0.205	0.065	1
Ndufa13	0.0324612	-0.478855	0.846	0.839	1
Mef2d	0.0326008	0.258449	0.436	0.21	1
Git2	0.0328057	0.376676	0.462	0.258	1
Rad23b	0.0328531	0.337125	0.513	0.258	1
Cavin3	0.0328843	-0.648072	0.821	0.823	1
Rps7	0.0330931	-0.44004	1	1	1
1810030O07Rik	0.0331628	0.25832	0.308	0.129	1
Smg6	0.0334698	0.275545	0.359	0.161	1
Orc6	0.0337031	0.307421	0.256	0.097	1
Zfp91	0.0337658	0.336948	0.615	0.387	1
Hist2h2bb	0.0337968	0.310976	0.154	0.032	1
Pisd	0.0337968	0.300845	0.154	0.032	1
Cox6a2	0.0337968	0.457237	0.154	0.032	1
Il13ra1	0.0338564	0.269233	0.59	0.339	1
Ccdc102a	0.0340276	0.260557	0.179	0.048	1
Lmnb1	0.0341857	0.461462	0.462	0.258	1
Rabgap1l	0.0342218	0.378878	0.41	0.194	1
Polr2c	0.0343058	-0.572121	0.256	0.435	1
Baiap2	0.0346323	0.272966	0.256	0.097	1
Ier5	0.0347552	-0.813884	0.256	0.403	1
Nars	0.0347673	0.290644	0.667	0.387	1
Emc4	0.0349696	0.29438	0.462	0.242	1
BC005537	0.0349913	0.345399	0.667	0.419	1
Zfp644	0.0351392	0.319223	0.615	0.371	1
Tinagl1	0.0353819	0.315754	0.205	0.065	1
Elob	0.0354426	-0.384894	0.949	0.935	1
Myl6	0.036075	-0.28216	1	0.968	1
Shisa3	0.0360852	-0.604659	0.026	0.161	1
Cks2	0.0362494	0.627681	0.333	0.161	1
Calm3	0.0362834	-0.402051	0.821	0.79	1
S100b	0.0364043	-0.883035	0.077	0.226	1
Tasor	0.0364184	0.281443	0.513	0.274	1
Ttc37	0.0366168	0.290413	0.308	0.129	1
Emilin2	0.0366474	0.374673	0.795	0.516	1
Tmem123	0.0368412	0.269694	0.41	0.21	1
Bst2	0.0371708	-0.489078	0.641	0.694	1
Arl5a	0.0372416	0.274966	0.385	0.177	1
Svil	0.0374203	-0.641448	0.718	0.742	1
Igf2r	0.0378543	0.358267	0.462	0.258	1
Plat	0.037887	0.268164	0.667	0.403	1
Dnajb1	0.0379654	-1.09004	0.205	0.371	1
Neat1	0.0381541	1.0503	0.795	0.581	1
Atad2	0.0384222	0.363715	0.359	0.161	1
Kctd2	0.0384558	0.26504	0.308	0.129	1
Clec3b	0.0384565	0.388199	0.897	0.661	1
Col15a1	0.038837	0.471635	0.179	0.048	1
Tubb5	0.0388416	0.51697	0.821	0.661	1
Dync1i2	0.0388559	0.303133	0.795	0.5	1
Nsa2	0.0390653	0.318864	0.897	0.726	1
Cadm3	0.0392237	0.352605	0.564	0.323	1
P4hb	0.0393966	0.354829	0.897	0.629	1
Mrps14	0.0394453	-0.517197	0.641	0.645	1
Col16a1	0.039576	-0.718891	0.205	0.371	1
Zbtb37	0.0396134	0.469484	0.256	0.097	1
Bcl7a	0.0398446	0.575116	0.308	0.145	1
Fndc1	0.039941	0.473455	0.872	0.661	1
Psmd8	0.0399432	0.255743	0.795	0.468	1
Atp5j	0.0404082	-0.530104	0.821	0.823	1
Lsm5	0.04058	0.302212	0.487	0.29	1
Nsun2	0.0406794	0.274611	0.256	0.097	1
Hspg2	0.0407127	0.356966	0.718	0.468	1
Ppwd1	0.0411618	0.267398	0.205	0.065	1
Spop	0.0411754	0.29675	0.641	0.435	1
Retreg2	0.0414631	-0.390304	0.077	0.226	1
Grcc10	0.0416907	-0.359356	0.718	0.71	1
Ube2d3	0.0418035	0.286699	0.872	0.742	1
Trpc4ap	0.0418395	0.256455	0.41	0.21	1
Retreg3	0.0419875	0.254463	0.282	0.113	1
Vezf1	0.0421477	0.367767	0.487	0.274	1
Klf7	0.0422903	0.318712	0.564	0.323	1
Errfi1	0.0424217	0.315871	0.564	0.355	1
Pnisr	0.0425361	0.317599	0.692	0.484	1
Rictor	0.0425971	0.34513	0.333	0.161	1
Cnih4	0.043033	-0.606582	0.41	0.5	1
Fkbp2	0.0431145	-0.542469	0.59	0.629	1
Klf4	0.0433052	0.788661	0.872	0.677	1
Thbd	0.0433508	0.534977	0.538	0.323	1
Rif1	0.0434282	0.298612	0.385	0.177	1
Fam171b	0.0434282	0.315964	0.385	0.177	1
Txn1	0.0434292	-0.625843	0.974	0.919	1
Ilk	0.0434326	0.30451	0.667	0.419	1
Ube2a	0.0435625	0.316583	0.538	0.306	1
Spg7	0.0440243	0.253215	0.256	0.097	1
Epb41l2	0.0440907	0.301828	0.821	0.597	1
Ildr2	0.0442879	0.311956	0.41	0.194	1
Efemp1	0.0444123	0.423611	0.872	0.806	1
Sema3c	0.0444647	0.42762	0.795	0.613	1
Slc6a6	0.0446831	-0.930507	0.282	0.403	1
Fgfr1	0.0447825	0.33289	0.821	0.613	1
Txndc17	0.0448336	-0.347964	0.821	0.79	1
Gsn	0.0449082	0.44917	1	0.919	1
Pttg1	0.0449804	-0.562561	0.308	0.435	1
Fech	0.0450407	0.379311	0.333	0.145	1
Bcl11a	0.0451842	0.30988	0.231	0.081	1
Gxylt2	0.0452158	0.297098	0.59	0.355	1
Rpl4	0.0454417	0.317452	0.923	0.839	1
Eef2	0.0454417	0.488494	0.923	0.839	1
Serpina3c	0.0456499	-0.41609	0.026	0.145	1
Nudt22	0.0456499	-0.26788	0.026	0.145	1
Aplp2	0.0460471	0.346235	0.846	0.548	1
Hsp90aa1	0.0463123	0.348123	0.821	0.613	1
Prpf38b	0.0463948	0.279434	0.513	0.29	1
Entpd2	0.0468142	0.421796	0.462	0.274	1
Lox	0.0473079	0.39783	0.385	0.194	1
Nol7	0.047465	0.271041	0.718	0.516	1
Gapdh	0.0477491	-0.400352	0.872	0.871	1
Ndufb1-ps	0.0477973	0.268706	0.846	0.613	1
Rab24	0.0482576	-0.497196	0.282	0.419	1
Pcbp2	0.0484435	0.27559	0.821	0.694	1
Ppia	0.0487762	-0.502309	1	0.952	1
Lsm7	0.0487992	-0.498684	0.41	0.5	1
Taf10	0.0491042	-0.571227	0.59	0.597	1
Kmo	0.0491813	0.299755	0.103	0.016	1
Uhrf1	0.0491813	0.350566	0.103	0.016	1
Glud1	0.0492984	0.316591	0.897	0.597	1
Gpc6	0.0493688	0.351039	0.538	0.323	1
Plscr4	0.0494017	0.301229	0.385	0.177	1
Itih5	0.0501195	0.429058	0.821	0.645	1
Slc35g1	0.0502019	-0.312503	0.026	0.145	1
Ppp3cb	0.0502832	0.294397	0.538	0.323	1
Uqcrh	0.0503418	-0.324195	0.897	0.935	1
Cntln	0.0503458	0.32353	0.308	0.145	1
Col8a2	0.0507076	-0.718029	0.051	0.177	1
Serbp1	0.0507644	0.341568	0.949	0.774	1
Hcfc1r1	0.0508871	-0.548572	0.641	0.645	1
D8Ertd738e	0.0511539	-0.479625	0.795	0.806	1
Sept11	0.0512465	0.317315	0.641	0.371	1
Guk1	0.051831	-0.580195	0.359	0.468	1
Mgp	0.0519677	-0.382284	0.179	0.355	1
Aurkaip1	0.0521247	-0.430905	0.615	0.645	1
Alpl	0.0527409	-0.876093	0.077	0.21	1
Ugdh	0.053048	0.426079	0.692	0.435	1
Slc35a2	0.053379	-0.264634	0.077	0.226	1
Cdc42	0.0536186	-0.352042	0.949	0.855	1
Zfp579	0.0536189	0.332385	0.103	0.016	1
Jpt1	0.0537519	0.323883	0.821	0.613	1
Ipo7	0.0538006	0.251079	0.282	0.129	1
Mrpl51	0.0539929	0.281971	0.667	0.419	1
Adamtsl1	0.0546663	0.277495	0.564	0.323	1
Ccnd3	0.0549534	0.371801	0.641	0.371	1
Agrn	0.0551283	-0.331165	0.026	0.145	1
E2f2	0.0551945	0.268741	0.308	0.161	1
Tmem208	0.0551967	-0.560368	0.308	0.435	1
Ogn	0.055205	0.315577	0.897	0.839	1
Ubxn7	0.0553921	0.264321	0.256	0.113	1
Il1rn	0.0554815	-0.491306	0.077	0.21	1
Zfp950	0.0554848	0.275489	0.359	0.177	1
Mapk3	0.0555472	-0.57091	0.359	0.5	1
Bola2	0.0558287	-0.46491	0.462	0.532	1
Eloc	0.0558438	-0.516166	0.59	0.613	1
Atp5h	0.0563383	-0.451666	0.897	0.919	1
Pcm1	0.056817	0.353773	0.667	0.435	1
Gid4	0.0568956	-0.47827	0.077	0.21	1
Fam160b2	0.0568956	-0.342922	0.077	0.21	1
Rere	0.0572075	0.267816	0.487	0.258	1
Strn3	0.0572479	0.422107	0.513	0.306	1
Tsn	0.0573296	0.302638	0.718	0.468	1
Rpl8	0.0573318	-0.369672	1	0.968	1
Malt1	0.0577294	0.315205	0.282	0.129	1
Pmepa1	0.0579822	-0.813771	0.513	0.581	1
Tle5	0.0580049	-0.532619	0.872	0.79	1
Ogt	0.0580775	0.376375	0.718	0.484	1
Tsr3	0.0582238	-0.298452	0.051	0.177	1
Pex2	0.0589771	-0.427825	0.128	0.274	1
Rgs2	0.0590816	0.281201	0.513	0.29	1
Cxxc5	0.0591656	0.318662	0.436	0.258	1
Rpl19	0.059185	-0.372017	0.974	1	1
Rap1a	0.0592463	0.252284	0.872	0.581	1
Wls	0.0592648	0.29709	0.718	0.468	1
Sra1	0.0595911	-0.493674	0.513	0.565	1
Msmo1	0.0596083	0.261276	0.256	0.113	1
Crk	0.0604752	0.259352	0.487	0.274	1
Caprin1	0.0605243	0.299432	0.718	0.484	1
Ubl3	0.0608274	0.391911	0.538	0.339	1
Grb2	0.0609421	-0.466783	0.513	0.581	1
Eif3c	0.0611783	0.258101	0.821	0.613	1
Smim11	0.0613415	-0.412087	0.615	0.629	1
Mpc2	0.0616754	-0.42469	0.846	0.79	1
Ecrg4	0.0622247	-1.84333	0.154	0.29	1
Osr1	0.0623213	-0.68474	0.436	0.548	1
C4b	0.0625644	0.332512	0.256	0.113	1
Ptpn4	0.0626748	0.391997	0.128	0.032	1
Rag1	0.0626748	0.425699	0.128	0.032	1
Cenpe	0.0626748	0.305301	0.128	0.032	1
Slc22a5	0.0626748	0.263522	0.128	0.032	1
Stxbp6	0.0633766	0.310991	0.462	0.274	1
Arhgef25	0.063547	-0.502222	0.154	0.29	1
Irf8	0.0636143	0.721795	0.231	0.097	1
Mgst1	0.064287	0.309986	0.872	0.565	1
Tcf4	0.0642909	0.289768	0.795	0.5	1
Herpud1	0.0651116	0.279183	0.538	0.306	1
Lgals3bp	0.0660358	0.274988	0.41	0.258	1
Tdp2	0.0660623	0.288817	0.179	0.065	1
Srsf3	0.0663015	0.277834	0.846	0.71	1
Selenok	0.066353	-0.375663	0.872	0.887	1
Ttc3	0.0666303	0.338592	0.59	0.355	1
Fbxw7	0.0666433	0.341685	0.205	0.081	1
Ptpn2	0.0669035	0.287315	0.231	0.097	1
Phlda3	0.067056	-0.569863	0.179	0.323	1
Phf11d	0.0671888	0.329743	0.308	0.161	1
Napsa	0.0672251	0.28352	0.256	0.113	1
Zcchc24	0.067278	0.256019	0.513	0.306	1
Ndufb8	0.0681113	-0.518177	0.692	0.645	1
Tmsb10	0.0681382	-0.434019	1	0.935	1
Txnip	0.0684227	-0.599039	0.795	0.839	1
Adam8	0.0689569	-0.453596	0.128	0.29	1
Rbm8a	0.069262	0.306448	0.538	0.355	1
Dpm3	0.0697031	-0.475778	0.769	0.774	1
Foxc1	0.0697226	-0.622794	0.026	0.129	1
Pttg1ip	0.0702129	-0.462411	0.667	0.677	1
Atp5md	0.0702745	-0.373509	0.846	0.774	1
Has1	0.0708167	0.556194	0.154	0.048	1
Pdgfrl	0.0711399	-1.04893	0.128	0.258	1
Traf1	0.0719247	-0.357723	0.026	0.129	1
Eif2b1	0.0719247	-0.257837	0.026	0.129	1
Atp5g3	0.0723327	-0.35677	0.692	0.677	1
Arpc3	0.0725604	-0.41222	0.872	0.839	1
Mbnl2	0.0729071	0.289394	0.769	0.5	1
Tnfrsf13c	0.073047	0.357212	0.154	0.048	1
Rbp1	0.0738207	-1.24236	0.282	0.403	1
Taldo1	0.0741368	-0.629318	0.795	0.758	1
H2-DMb1	0.0741835	-0.340882	0.026	0.129	1
Ift57	0.0746341	-0.345415	0.103	0.226	1
Bri3	0.0748905	-0.365951	0.795	0.823	1
Snu13	0.0754824	0.299971	0.692	0.452	1
Rps20	0.0758629	-0.374619	1	1	1
Gm4258	0.0760408	0.264447	0.205	0.081	1
Rpgrip1	0.0760408	0.272878	0.205	0.081	1
Cfb	0.0765236	-0.476418	0.154	0.29	1
Creb5	0.0771364	0.370792	0.615	0.452	1
Myof	0.0788158	0.360395	0.538	0.306	1
C1qtnf4	0.0788751	-0.362421	0.026	0.129	1
Chl1	0.0788751	-0.397427	0.026	0.129	1
Ndufa5	0.0791517	-0.387761	0.718	0.726	1
Rrbp1	0.0793824	0.372886	0.897	0.806	1
Mpzl1	0.079535	-0.437166	0.077	0.194	1
Krtdap	0.0795892	-0.965741	0.231	0.387	1
Sparcl1	0.0800849	0.251497	0.154	0.048	1
Sltm	0.0801141	0.265097	0.538	0.339	1
Irf3	0.0802575	-0.444133	0.128	0.242	1
Ssr4	0.0804094	-0.65133	0.744	0.742	1
Rab11fip5	0.0805137	0.251722	0.179	0.065	1
Oaz1	0.0805835	-0.288616	1	0.984	1
Atp13a1	0.0811608	-0.398775	0.051	0.161	1
Gas6	0.0813017	-1.1037	0.154	0.29	1
S100a6	0.0817913	-0.835564	1	0.935	1
Hsd11b1	0.0822291	-0.647527	0.231	0.355	1
Cyba	0.0823001	-0.512135	0.821	0.839	1
Pak2	0.0825678	0.2896	0.821	0.581	1
Clic4	0.0829993	0.282696	0.692	0.452	1
Qk	0.0834095	0.419171	0.744	0.548	1
Nab1	0.083466	0.273132	0.359	0.177	1
Dctn6	0.0838608	-0.428002	0.308	0.403	1
Alkbh5	0.0842325	0.254433	0.538	0.339	1
Arhgap20	0.0842776	0.275242	0.513	0.306	1
Park7	0.0845012	-0.371159	0.821	0.806	1
Vkorc1	0.0853684	-0.777415	0.667	0.613	1
Car8	0.0855046	0.28488	0.436	0.258	1
Pkdcc	0.0855119	-0.514838	0.077	0.194	1
Mfap4	0.0858802	-0.417942	0.077	0.21	1
Ammecr1	0.0863191	0.256939	0.333	0.177	1
Ctss	0.0864924	0.439481	0.205	0.081	1
Mmp9	0.0865491	-0.87246	0.205	0.355	1
Rpl35a	0.0868167	-0.329386	1	1	1
9130401M01Rik	0.0880462	-0.255654	0.154	0.29	1
Immt	0.0890445	0.322038	0.462	0.274	1
Tpr	0.089139	0.261704	0.846	0.613	1
Tradd	0.0893079	-0.336653	0.103	0.226	1
Nr1h2	0.0900382	-0.357361	0.231	0.355	1
Mxd1	0.0909676	-0.965705	0.256	0.371	1
Tmem50a	0.0913671	0.270581	0.769	0.532	1
Sash1	0.0913681	0.261554	0.744	0.548	1
Paxx	0.0914138	-0.55466	0.231	0.339	1
Itgb1bp1	0.0916695	-0.465419	0.231	0.355	1
Bcl7c	0.091782	-0.523075	0.615	0.581	1
Atp8b2	0.0918467	-0.319101	0.077	0.194	1
Hcar2	0.0918467	-0.548865	0.077	0.194	1
Igfbp5	0.0920456	-0.451607	0.897	0.968	1
Swi5	0.0923022	-0.501621	0.821	0.71	1
Ddrgk1	0.0925238	-0.558026	0.538	0.548	1
Sec61b	0.093086	-0.355134	0.872	0.871	1
Plekhf1	0.0935936	-0.312937	0.128	0.258	1
Polr2a	0.0943991	0.270392	0.385	0.226	1
Mrpl17	0.0945101	-0.430184	0.359	0.452	1
Tcea1	0.0953669	0.327107	0.667	0.5	1
Cd24a	0.0957046	0.554588	0.667	0.452	1
Fosb	0.096364	0.284836	0.513	0.306	1
Pik3c2a	0.0965129	-0.295682	0.154	0.274	1
Polr2e	0.0969779	-0.500695	0.385	0.468	1
Emilin1	0.0974715	-0.404866	0.103	0.226	1
Gnl3	0.0975851	0.277395	0.359	0.21	1
Glipr2	0.0977202	-0.492297	0.308	0.403	1
Triap1	0.0985532	-0.256966	0.077	0.194	1
Gga1	0.0985532	-0.352029	0.077	0.194	1
Ppih	0.098597	0.263969	0.231	0.113	1
Ecpas	0.0987037	0.307813	0.462	0.274	1
Psenen	0.0987842	-0.454538	0.692	0.661	1
Rps5	0.0990132	-0.397674	1	1	1
Apoe	0.0995316	-1.0249	0.282	0.435	1
Krtcap2	0.0996048	-0.466802	0.795	0.742	1
Atp6v1b2	0.100333	-0.269224	0.179	0.323	1
Mob4	0.100413	0.377128	0.487	0.323	1
Ifitm1	0.100929	-0.470312	0.154	0.29	1
Fundc2	0.100987	0.272455	0.641	0.387	1
Eif5a	0.101087	-0.393629	0.923	0.774	1
Cdk12	0.101976	0.307564	0.436	0.242	1
Lsm10	0.102198	-0.420244	0.179	0.323	1
Pdlim2	0.102505	-0.456453	0.513	0.581	1
Tmpo	0.102727	0.256022	0.462	0.306	1
Hnrnpc	0.102907	0.253721	0.692	0.452	1
Prkar2a	0.103156	0.261777	0.231	0.113	1
Ptma	0.103366	0.260414	1	0.952	1
Aprt	0.104343	-0.419904	0.59	0.613	1
Slpi	0.10451	-1.32456	0.256	0.371	1
Psmb2	0.104723	-0.421159	0.641	0.694	1
Arid1a	0.105306	0.318265	0.487	0.29	1
Mif4gd	0.105473	-0.356728	0.128	0.242	1
Mtln	0.105567	-0.489641	0.256	0.355	1
Fndc4	0.106079	-0.319606	0.026	0.113	1
Fzd8	0.106079	-0.298943	0.026	0.113	1
Mturn	0.106124	-0.385444	0.205	0.339	1
Ptgis	0.107386	-0.65874	0.462	0.484	1
Pla2g7	0.107956	-0.288665	0.051	0.161	1
Aarsd1	0.10796	-0.474101	0.205	0.306	1
Wnk1	0.108595	0.365102	0.846	0.613	1
Micu2	0.108726	-0.361277	0.256	0.387	1
Cpne2	0.109234	-0.376027	0.231	0.339	1
Ltbp2	0.109338	-0.320334	0.026	0.113	1
Hmgb2	0.109695	1.15147	0.769	0.581	1
Gdpd5	0.110368	-0.470396	0.077	0.177	1
Hip1	0.110824	-0.261229	0.103	0.226	1
Adgrd1	0.110909	0.258487	0.513	0.355	1
Ier3	0.110938	-1.33098	0.205	0.306	1
Prdx3	0.110938	0.37888	0.359	0.21	1
Pbx1	0.111476	-0.625514	0.667	0.613	1
Ctnnbip1	0.112239	-0.364217	0.179	0.29	1
Commd3	0.112249	-0.298776	0.359	0.468	1
Tor1aip1	0.112622	0.298748	0.641	0.532	1
Prmt2	0.112982	-0.311848	0.077	0.177	1
Nub1	0.113193	-0.411142	0.103	0.21	1
Mrps12	0.115046	-0.382134	0.333	0.435	1
Ccn2	0.115583	-0.483685	0.051	0.145	1
Krt83	0.115583	-0.478105	0.051	0.145	1
Tesk2	0.116093	-0.255633	0.026	0.113	1
Prdm6	0.116093	-0.377919	0.026	0.113	1
Ube2i	0.116317	0.404592	0.641	0.468	1
S100a10	0.116534	-0.694902	1	0.935	1
Dmkn	0.116704	-0.951122	0.128	0.242	1
Phpt1	0.117085	-0.61897	0.205	0.306	1
Bbx	0.117523	0.326147	0.256	0.145	1
Sdf2	0.11822	-0.550531	0.41	0.468	1
Klra2	0.118597	-0.28879	0.051	0.145	1
Gsta4	0.118597	-0.398227	0.051	0.145	1
Chrd	0.118597	-0.284767	0.051	0.145	1
Wdr61	0.119193	0.313028	0.359	0.21	1
Cilp2	0.119591	-0.419344	0.026	0.113	1
Scara5	0.119984	0.264663	0.821	0.694	1
Nbl1	0.120021	-0.771871	0.744	0.71	1
Rnf130	0.120294	-0.489786	0.462	0.468	1
Abhd11	0.120687	-0.308991	0.103	0.21	1
Jdp2	0.120942	-0.58444	0.256	0.355	1
Coq7	0.121407	0.39727	0.282	0.161	1
Mdk	0.121451	-0.671838	0.128	0.242	1
Fastk	0.121614	-0.313424	0.154	0.274	1
Eif4g1	0.122219	0.252514	0.795	0.548	1
Mgst3	0.123019	0.334745	0.256	0.129	1
Hmgcs2	0.123172	-0.291809	0.026	0.113	1
Ccl2	0.123172	-1.13395	0.026	0.113	1
Mrgbp	0.12481	-0.322886	0.051	0.145	1
Avpi1	0.12481	-0.264788	0.051	0.145	1
G0s2	0.124872	-0.606593	0.41	0.516	1
Rhoq	0.125062	-0.498669	0.333	0.452	1
Alox5ap	0.125689	-0.804327	0.256	0.371	1
Hes1	0.125775	-0.757897	0.154	0.258	1
Psmb4	0.126816	-0.459512	0.769	0.661	1
Thy1	0.127381	0.359565	0.641	0.452	1
Igfbp4	0.128222	-0.637036	0.897	0.919	1
Cmah	0.129455	0.401029	0.359	0.226	1
Aff4	0.129477	0.266307	0.538	0.339	1
Prr13	0.129957	-0.412378	0.436	0.548	1
Il1b	0.130621	-2.35216	0.154	0.258	1
Tmem238	0.130621	-0.327083	0.154	0.258	1
S100a4	0.130776	0.935857	0.359	0.242	1
Syne1	0.131459	-0.591616	0.333	0.468	1
Tspan12	0.131872	0.276539	0.103	0.032	1
2310011J03Rik	0.132468	-0.443439	0.205	0.306	1
Ahr	0.132671	0.255272	0.205	0.097	1
Trps1	0.134121	0.326444	0.231	0.113	1
Jaml	0.134602	-0.40311	0.051	0.145	1
Edil3	0.134602	-0.453903	0.051	0.145	1
Cdkn1b	0.136384	0.269236	0.615	0.387	1
Rpsa	0.138274	-0.273388	1	1	1
Arhgef17	0.138335	0.30074	0.128	0.048	1
Id3	0.139052	-1.44851	0.667	0.661	1
Sdhb	0.13927	-0.388618	0.487	0.532	1
Rpp25l	0.139521	-0.50371	0.205	0.306	1
Clpp	0.139562	-0.491756	0.256	0.339	1
Gramd1a	0.139682	-0.31401	0.103	0.21	1
Cbx4	0.139682	-0.273301	0.103	0.21	1
Hmgb1	0.139718	0.326953	0.872	0.871	1
Smim4	0.140818	-0.469169	0.256	0.371	1
Dgat1	0.141204	-0.698671	0.282	0.371	1
Alkbh3	0.141882	-0.254765	0.077	0.177	1
Glis2	0.142574	-0.333902	0.103	0.21	1
Rpl10a	0.142971	-0.385227	0.974	0.984	1
Ndufb10	0.144714	-0.425244	0.744	0.758	1
Clmp	0.145942	-0.529021	0.308	0.371	1
Hspb11	0.146029	-0.431592	0.154	0.258	1
Col4a4	0.146438	0.342143	0.128	0.048	1
Kcnj8	0.146438	0.504409	0.128	0.048	1
Rab21	0.147813	-0.38382	0.436	0.548	1
H2-Ob	0.148153	0.347185	0.179	0.081	1
Prkcd	0.149371	-0.319985	0.205	0.306	1
Ppib	0.149934	-0.309161	0.821	0.855	1
Ifi35	0.151365	-0.384289	0.256	0.339	1
Ndufa4	0.151594	-0.334088	0.923	0.903	1
Rhoc	0.152893	-0.343028	0.821	0.774	1
Pigp	0.152904	-0.510203	0.385	0.452	1
Vasp	0.153306	-0.507346	0.359	0.435	1
Sap30l	0.15402	-0.407664	0.41	0.435	1
Borcs8	0.154044	-0.33856	0.179	0.274	1
Itm2a	0.154164	0.255414	0.641	0.419	1
Klf2	0.154778	-0.85735	0.846	0.823	1
Npdc1	0.154815	-0.388443	0.59	0.581	1
Myo10	0.154918	-0.335264	0.077	0.177	1
Slc4a10	0.155251	-0.670478	0.103	0.194	1
Prkra	0.155251	-0.3998	0.103	0.194	1
Prps2	0.155251	-0.468246	0.103	0.194	1
Cxcl12	0.155328	0.583934	0.692	0.468	1
Il17d	0.155639	0.304894	0.154	0.065	1
Anxa1	0.155719	-0.455306	0.949	0.935	1
Atp5mpl	0.155842	0.326106	0.795	0.629	1
Smco4	0.156737	-0.496028	0.154	0.242	1
Mast4	0.157077	0.297514	0.359	0.242	1
Nosip	0.159521	-0.348784	0.128	0.226	1
Ppp1r14b	0.159666	-0.350807	0.949	0.871	1
Mia3	0.15984	0.275532	0.718	0.581	1
Gdf10	0.160898	-0.440989	0.103	0.21	1
Arrb1	0.16173	-0.361392	0.103	0.194	1
2210016F16Rik	0.16173	-0.422142	0.103	0.194	1
Hsbp1	0.163257	-0.358969	0.718	0.71	1
Dut	0.163537	0.568354	0.333	0.21	1
Ahnak2	0.164386	0.27069	0.667	0.516	1
H2afj	0.165786	-0.26055	0.667	0.694	1
Tenm3	0.166192	-0.67748	0.077	0.161	1
Capn1	0.166516	-0.391897	0.256	0.339	1
Prxl2c	0.166706	-0.28713	0.385	0.452	1
Grasp	0.16989	-0.352184	0.077	0.161	1
Atp5g1	0.170089	-0.490585	0.769	0.726	1
Myl9	0.170902	-0.622294	0.179	0.274	1
Bag6	0.170902	-0.410062	0.179	0.274	1
Cd9	0.171243	-0.368973	0.795	0.823	1
Dad1	0.171393	-0.597558	0.795	0.645	1
Klf13	0.171516	0.281516	0.641	0.435	1
Slc7a2	0.171829	-0.528858	0.103	0.194	1
Rps11	0.172672	-0.29728	1	0.984	1
Rpl18a	0.172672	-0.300832	1	0.984	1
Wtap	0.173155	0.255523	0.385	0.258	1
S100a9	0.174986	-0.900266	0.641	0.645	1
Gpc1	0.176184	-0.321266	0.051	0.129	1
Limk2	0.176184	-0.270411	0.051	0.129	1
Ankrd33b	0.176184	-0.276327	0.051	0.129	1
Nsd1	0.176207	0.271017	0.667	0.419	1
Lmna	0.177689	-0.720371	0.538	0.565	1
Blvrb	0.178694	0.522455	0.744	0.694	1
Exoc7	0.179089	-0.293782	0.128	0.21	1
H2-D1	0.179249	-0.437561	0.949	0.903	1
Ost4	0.179438	-0.381427	0.795	0.726	1
Il11ra1	0.180037	-0.779829	0.692	0.645	1
Csnk2a1	0.180731	0.334022	0.769	0.565	1
Cers5	0.180964	0.308321	0.282	0.177	1
Tspo	0.180967	-0.479566	0.795	0.742	1
Ccn3	0.181281	-1.11256	0.436	0.468	1
Galt	0.181355	-0.296632	0.077	0.161	1
0610010K14Rik	0.181478	-0.51476	0.41	0.452	1
Eid2	0.181853	-0.251022	0.128	0.226	1
Plaur	0.182107	-0.619612	0.205	0.306	1
Olfml3	0.182886	-0.979579	0.179	0.274	1
Mmp8	0.182886	-0.267721	0.154	0.29	1
Gramd3	0.183338	0.333289	0.205	0.113	1
Socs1	0.183688	-0.268389	0.205	0.097	1
2310001H17Rik	0.184303	-0.569357	0.154	0.242	1
Ndufb3	0.184957	-0.360315	0.667	0.581	1
Slc16a3	0.187345	-0.575305	0.154	0.258	1
Tecr	0.187487	-0.418954	0.615	0.597	1
Trnau1ap	0.188455	-0.326944	0.256	0.339	1
Hdc	0.18966	-0.750275	0.205	0.29	1
Csf2ra	0.18966	-0.381207	0.205	0.29	1
Pnrc1	0.190991	-0.412101	0.795	0.774	1
Sidt2	0.191146	-0.470556	0.333	0.371	1
Chpf	0.19134	-0.388309	0.256	0.339	1
Htatip2	0.192743	-0.270149	0.205	0.29	1
Gdpd3	0.194025	-0.302882	0.051	0.129	1
Rhog	0.19431	0.28863	0.41	0.306	1
Dtnbp1	0.194386	-0.295683	0.385	0.468	1
Dctn3	0.195523	-0.373928	0.615	0.694	1
Washc3	0.195862	-0.335784	0.205	0.29	1
Efemp2	0.1959	-0.393067	0.462	0.484	1
Basp1	0.195946	-0.430453	0.641	0.661	1
Derl1	0.197085	-0.310049	0.385	0.452	1
Cebpb	0.198226	-0.475757	0.692	0.677	1
Acta2	0.198686	-1.18141	0.051	0.129	1
Vamp8	0.198805	-0.387023	0.615	0.661	1
Lamtor4	0.198895	-0.364723	0.692	0.694	1
Ghr	0.199018	-0.324515	0.205	0.29	1
Cdc42ep5	0.200192	-0.486475	0.256	0.339	1
Rest	0.200602	0.254773	0.282	0.177	1
Cyb5a	0.202124	-0.272769	0.872	0.823	1
Pigx	0.202211	-0.262658	0.205	0.29	1
Rps19	0.203021	-0.314173	0.974	1	1
Rps24	0.203021	-0.299065	1	1	1
Rab2a	0.203162	-0.34078	0.846	0.742	1
Hmbs	0.203951	0.69249	0.231	0.145	1
Psma2	0.204119	-0.300449	0.744	0.742	1
Shisa5	0.204739	-0.34675	0.59	0.629	1
Angptl1	0.206628	1.16961	0.205	0.113	1
Nme1	0.207702	-0.474498	0.564	0.565	1
Mgll	0.208126	-0.591386	0.487	0.548	1
Hltf	0.208258	-0.330024	0.179	0.258	1
Psma3	0.208703	-0.349027	0.744	0.726	1
Ndufa8	0.210231	-0.365641	0.538	0.565	1
Tmsb4x	0.210546	-0.437631	1	1	1
Hacd2	0.21071	-0.284455	0.103	0.177	1
Sephs2	0.211496	-0.314393	0.128	0.21	1
Slc25a3	0.211526	-0.256469	0.923	0.871	1
Hspa8	0.212939	-0.294878	0.949	0.887	1
Ndufaf8	0.212979	-0.456444	0.436	0.468	1
Crispld2	0.213868	-0.503684	0.128	0.226	1
Lilr4b	0.214171	-0.653895	0.231	0.306	1
Pkm	0.214766	-0.334321	0.795	0.726	1
Trnp1	0.214849	-0.382575	0.103	0.177	1
Mthfs	0.215343	-0.255572	0.128	0.21	1
Eif4h	0.215791	-0.378249	0.436	0.468	1
Il1f9	0.216959	-0.296378	0.103	0.194	1
Thbs2	0.217045	-0.3252	0.718	0.468	1
Dapk3	0.217299	-0.450386	0.205	0.274	1
Trp53i13	0.219754	-0.276732	0.231	0.323	1
Mrps7	0.220292	-0.381414	0.333	0.371	1
Gabarapl2	0.222085	-0.539732	0.718	0.677	1
Tiparp	0.222556	0.449191	0.308	0.194	1
Cxcr2	0.222675	-0.459347	0.154	0.242	1
Higd1a	0.223258	-0.332182	0.462	0.484	1
Abhd17a	0.223258	-0.369143	0.487	0.468	1
Zfpl1	0.223304	-0.321403	0.103	0.177	1
Slfn4	0.22371	-0.307933	0.077	0.161	1
Cuedc1	0.225939	-0.315703	0.179	0.258	1
Tmem119	0.226428	-0.351275	0.154	0.242	1
Mrpl54	0.226491	-0.295174	0.564	0.532	1
Lrp1	0.226921	-0.401408	0.872	0.855	1
Slfn1	0.227087	-0.51578	0.154	0.226	1
Ppil2	0.227504	-0.367294	0.231	0.306	1
Ptch1	0.22762	0.255985	0.205	0.113	1
Cdk2ap2	0.227649	-0.391633	0.615	0.661	1
Uqcrb	0.22804	-0.312347	0.846	0.694	1
Col11a1	0.228376	-0.614948	0.051	0.129	1
Timm10b	0.230912	-0.293851	0.769	0.629	1
Tm2d2	0.231219	-0.451934	0.487	0.484	1
Ubac2	0.231994	-0.333299	0.103	0.177	1
Abcg2	0.232969	-0.331772	0.077	0.161	1
Retnlg	0.233597	-1.40538	0.308	0.371	1
S100a1	0.234882	-0.743861	0.256	0.306	1
Eml4	0.235148	-0.445435	0.256	0.323	1
Dgkh	0.235853	-0.380469	0.077	0.145	1
Pdgfrb	0.236125	-0.364121	0.359	0.435	1
Rpl15	0.237081	-0.275428	1	0.968	1
Igkc	0.237885	-3.65059	0.359	0.226	1
Emc6	0.238239	-0.264382	0.308	0.403	1
Csf3r	0.238867	-0.676897	0.154	0.226	1
Mfsd14a	0.239486	-0.301763	0.128	0.21	1
Clec4d	0.239486	-0.435354	0.128	0.21	1
Uqcr11	0.240634	-0.354217	0.872	0.855	1
Ifngr2	0.240776	-0.360593	0.359	0.419	1
Fpr1	0.240922	-0.374853	0.103	0.177	1
Chrac1	0.242509	-0.301089	0.308	0.387	1
Itm2b	0.24266	-0.349169	1	0.968	1
Psme2	0.243546	-0.376767	0.615	0.581	1
Ppdpf	0.243958	-0.389775	0.359	0.419	1
Emp3	0.243992	-0.335249	0.974	0.903	1
Pex16	0.245542	-0.285498	0.128	0.194	1
Rgs3	0.245808	-0.427613	0.077	0.145	1
BC005561	0.248596	-0.355009	0.231	0.306	1
Ppil3	0.249782	-0.329327	0.205	0.274	1
Hk3	0.250089	-0.255011	0.103	0.177	1
Myl12b	0.250476	-0.364289	0.846	0.694	1
Dab2ip	0.250895	-0.271752	0.077	0.145	1
Ifit3	0.250895	-0.44559	0.077	0.145	1
Sde2	0.25095	-0.261581	0.282	0.371	1
Bpgm	0.250992	0.262817	0.154	0.081	1
Cebpe	0.250992	0.268011	0.154	0.081	1
Arhgef1	0.252493	-0.252469	0.41	0.5	1
Elp4	0.252926	-0.299086	0.051	0.113	1
Clec4e	0.253997	-0.280357	0.128	0.226	1
Hilpda	0.254762	-0.318291	0.103	0.177	1
Rbmx	0.254762	-0.306438	0.103	0.177	1
Eid1	0.25486	-0.393934	0.667	0.629	1
Churc1	0.257237	-0.438298	0.487	0.452	1
Tor1aip2	0.257858	-0.398796	0.308	0.355	1
Emp1	0.258033	-0.361963	0.462	0.532	1
Gngt2	0.258646	-0.359748	0.385	0.484	1
Itprip	0.258832	-0.283901	0.051	0.113	1
Flrt2	0.258862	-0.485599	0.513	0.548	1
Aco1	0.259496	-0.317592	0.103	0.177	1
Sqor	0.260385	-0.49475	0.282	0.355	1
Tspan13	0.260466	-0.684461	0.179	0.242	1
Fam129a	0.260524	-0.440488	0.538	0.548	1
Lamtor1	0.261208	-0.298027	0.436	0.468	1
Fnbp1	0.262299	-0.325003	0.231	0.274	1
Hcls1	0.262794	0.296632	0.385	0.274	1
Lum	0.263051	-0.324945	0.923	0.758	1
Trim30d	0.264459	-0.327757	0.179	0.258	1
Tec	0.264832	-0.271747	0.051	0.113	1
Ppp1r2	0.265685	-0.40302	0.692	0.645	1
Hs3st1	0.266594	-0.385305	0.077	0.145	1
Mrpl41	0.267432	-0.288131	0.308	0.371	1
Spcs2	0.271369	-0.293491	0.744	0.71	1
Phlda1	0.271487	-0.297604	0.436	0.516	1
Ndufs6	0.271869	-0.304941	0.718	0.661	1
Pla1a	0.272365	-0.528974	0.154	0.226	1
Ccdc32	0.272629	-0.389286	0.128	0.194	1
B430306N03Rik	0.272629	-0.384442	0.128	0.194	1
Acaa1a	0.272784	-0.41307	0.333	0.355	1
Fmc1	0.273736	-0.32511	0.385	0.419	1
Mpp6	0.273736	-0.579909	0.385	0.419	1
H19	0.274062	-1.14108	0.103	0.177	1
Uqcr10	0.27421	-0.251296	0.872	0.839	1
Ccdc85b	0.274363	-0.491369	0.462	0.452	1
Slc7a11	0.274558	-0.37257	0.128	0.21	1
S100a13	0.274594	-0.285407	0.897	0.871	1
Sf3b5	0.275331	-0.31385	0.615	0.645	1
Uqcc3	0.276909	-0.278935	0.487	0.5	1
Mylk	0.277119	-0.356454	0.051	0.113	1
Tmem100	0.278101	-0.268635	0.769	0.71	1
Il33	0.279178	-0.671364	0.462	0.484	1
Tomm22	0.282239	-0.295144	0.615	0.629	1
Cdh11	0.286192	-0.503219	0.205	0.29	1
Ndrg2	0.286912	-0.603732	0.128	0.194	1
Sumo1	0.287452	-0.277372	0.59	0.565	1
Anxa4	0.288114	-0.307422	0.333	0.387	1
Runx2	0.289178	-0.280594	0.103	0.177	1
Rinl	0.292004	-0.296894	0.154	0.21	1
Myo1b	0.293016	0.302815	0.128	0.065	1
Siva1	0.293908	-0.311668	0.436	0.484	1
Kdelr1	0.294109	-0.329932	0.692	0.677	1
BC031181	0.294329	-0.30442	0.538	0.5	1
Atox1	0.295671	-0.31278	0.897	0.774	1
Etfb	0.296189	-0.473762	0.538	0.516	1
Cystm1	0.296268	-0.645955	0.051	0.113	1
Spats2l	0.296709	-0.264355	0.128	0.194	1
Dnajc4	0.296709	-0.314816	0.128	0.194	1
Rheb	0.297846	-0.363092	0.564	0.548	1
Bod1	0.298157	-0.295151	0.205	0.274	1
Arrdc1	0.29871	-0.276646	0.103	0.161	1
Gabpb1	0.299543	-0.287989	0.128	0.065	1
2410006H16Rik	0.299664	-0.564086	0.615	0.597	1
Asap2	0.299778	-0.316641	0.179	0.097	1
Ube2q2	0.301691	-0.271447	0.128	0.194	1
Mapkapk2	0.302453	-0.266804	0.205	0.274	1
Plxnd1	0.303122	0.311306	0.103	0.048	1
Cpxm2	0.304141	-0.819873	0.103	0.161	1
Gpsm3	0.305592	-0.368464	0.436	0.468	1
Stk17b	0.306234	-0.502716	0.487	0.516	1
Micos13	0.306898	-0.35657	0.564	0.613	1
Tap2	0.307193	-0.4089	0.231	0.274	1
Psmd9	0.307313	-0.301602	0.231	0.29	1
Ergic3	0.30819	-0.472716	0.538	0.5	1
Hexa	0.309116	-0.513842	0.487	0.484	1
Podn	0.309638	-0.316214	0.103	0.161	1
Ncam1	0.309638	-0.263411	0.103	0.161	1
Ms4a1	0.310029	0.3573	0.205	0.129	1
Pbxip1	0.310441	-0.251344	0.487	0.468	1
Dnajb9	0.31097	-0.387056	0.256	0.306	1
Gde1	0.311513	-0.466167	0.231	0.274	1
Slc2a3	0.313735	-0.445891	0.154	0.226	1
Sorl1	0.313872	-0.339081	0.282	0.371	1
Scn1b	0.314225	-0.298424	0.333	0.419	1
Dbndd2	0.3152	-0.264456	0.103	0.161	1
Igfbp7	0.319043	-0.665688	0.359	0.435	1
B230208H11Rik	0.320827	-0.369291	0.103	0.161	1
Hdac3	0.321025	-0.417768	0.154	0.21	1
2310039H08Rik	0.321508	-0.386503	0.385	0.403	1
Cmtm6	0.321904	-0.520677	0.333	0.339	1
Rab11b	0.322395	-0.35932	0.564	0.532	1
Srgn	0.323002	-0.908381	0.59	0.581	1
Rps13	0.323641	-0.344136	1	1	1
Lamtor2	0.326046	-0.342367	0.667	0.597	1
Fcer1g	0.326388	-0.866606	0.333	0.371	1
Ccl7	0.326594	-0.535871	0.103	0.177	1
Ramp2	0.32671	-0.704233	0.615	0.613	1
Mgst2	0.326887	-0.263556	0.179	0.242	1
Myl12a	0.328348	-0.340317	0.821	0.774	1
Ptges	0.328997	-0.420543	0.308	0.323	1
Tmem164	0.331104	-0.330674	0.154	0.21	1
Myoc	0.332277	0.322748	0.179	0.113	1
Glod4	0.332399	-0.47548	0.282	0.323	1
Ndufs2	0.333211	-0.426717	0.385	0.403	1
Arl6ip4	0.334127	-0.338146	0.359	0.387	1
Pdcl3	0.334202	-0.360317	0.308	0.355	1
1110065P20Rik	0.334482	-0.270542	0.333	0.371	1
Cdkn2aip	0.33622	-0.275407	0.154	0.21	1
Vps28	0.336297	-0.415854	0.487	0.468	1
Spice1	0.3381	-0.317247	0.103	0.161	1
Ptgs2	0.340232	-0.837617	0.231	0.29	1
Ubl4a	0.341715	-0.300336	0.282	0.339	1
Tmem189	0.342462	-0.446282	0.128	0.177	1
Sphk2	0.342462	-0.271322	0.128	0.177	1
Cd151	0.342965	-0.265118	0.205	0.274	1
St6galnac6	0.343119	-0.31918	0.077	0.129	1
Atp6v0b	0.343966	-0.317924	0.692	0.677	1
Hp	0.344432	-0.578109	0.256	0.323	1
Rpl37a	0.344581	-0.288585	1	1	1
Nop10	0.344728	-0.358789	0.59	0.581	1
Ndrg1	0.346023	-0.461926	0.282	0.339	1
Ptprd	0.347505	-0.755021	0.231	0.274	1
Cd302	0.34879	-0.52391	0.692	0.629	1
Ogfrl1	0.349377	-0.405068	0.231	0.29	1
Auh	0.351869	-0.263103	0.154	0.21	1
Eif3h	0.352629	-0.402453	0.769	0.661	1
Slc25a4	0.353201	-0.620095	0.897	0.726	1
Sfrp4	0.353319	-0.389378	0.487	0.339	1
Gdi1	0.353388	-0.307925	0.436	0.435	1
Cxcl2	0.353811	-0.818864	0.154	0.226	1
Sec14l1	0.354227	-0.286489	0.487	0.516	1
Lrrc8d	0.354557	-0.304222	0.128	0.194	1
Socs3	0.354997	-0.908076	0.333	0.387	1
Tmem109	0.355402	-0.391916	0.333	0.355	1
Nudt4	0.357618	-0.286579	0.538	0.548	1
Itm2c	0.358352	-0.593012	0.59	0.565	1
Prrx2	0.358678	-0.597745	0.231	0.29	1
Gng11	0.359212	-0.528018	0.564	0.548	1
Fbln1	0.359616	-0.848805	0.667	0.581	1
Bmx	0.362042	-0.274585	0.103	0.161	1
Prdx2	0.362654	0.67894	0.872	0.758	1
Tbcb	0.363393	-0.395087	0.615	0.5	1
Dbn1	0.363909	-0.390596	0.513	0.484	1
Irf7	0.365246	-0.282443	0.128	0.177	1
Psmb1	0.366802	-0.314272	0.769	0.645	1
Higd2a	0.36792	-0.566183	0.513	0.5	1
Ptx3	0.367972	-0.415989	0.154	0.21	1
Romo1	0.368718	-0.307197	0.821	0.726	1
Chd7	0.370024	-0.341713	0.077	0.129	1
Fos	0.371238	-0.352376	0.641	0.742	1
Atp8a1	0.371292	-0.283336	0.231	0.274	1
Bhlhe40	0.371605	-0.316057	0.179	0.242	1
Rabac1	0.371957	-0.487781	0.897	0.742	1
Eif4ebp1	0.375789	-0.3125	0.359	0.387	1
Lysmd2	0.376399	-0.286065	0.333	0.387	1
Bgn	0.376869	-0.815815	0.333	0.371	1
Pwwp3a	0.376986	-0.339656	0.128	0.177	1
Pebp1	0.378185	-0.345334	0.718	0.677	1
Cthrc1	0.37877	-1.08522	0.179	0.226	1
Timp1	0.378958	-0.344898	0.154	0.21	1
Uchl3	0.381083	-0.31579	0.231	0.274	1
Rnf13	0.381867	-0.337708	0.487	0.484	1
Nifk	0.382262	-0.4102	0.205	0.242	1
Sumo2	0.382625	-0.253089	0.923	0.823	1
Rab31	0.382941	-0.291112	0.128	0.177	1
Fcmr	0.383955	-0.293992	0.077	0.129	1
Psmb8	0.384783	-0.460408	0.667	0.613	1
Cxcl14	0.385347	0.93931	0.128	0.081	1
Selenof	0.386132	-0.462474	0.923	0.79	1
Srm	0.389516	-0.411658	0.179	0.226	1
Tnfsf12	0.390204	-0.334286	0.333	0.371	1
Mtx2	0.390284	-0.34298	0.282	0.306	1
Pirb	0.391031	-0.42415	0.231	0.274	1
Reep5	0.392163	-0.447467	0.821	0.677	1
Id1	0.395025	-0.578277	0.128	0.177	1
Trim12a	0.395197	-0.448479	0.333	0.355	1
Shc1	0.395473	-0.365443	0.282	0.323	1
Vps13a	0.395678	-0.293813	0.41	0.258	1
Cd33	0.395811	-0.349593	0.154	0.21	1
Snrpa1	0.396019	-0.389653	0.256	0.29	1
Tnfaip8	0.397772	-0.369492	0.359	0.387	1
Tbca	0.399474	-0.341199	0.795	0.677	1
Rdh12	0.401528	-0.251296	0.154	0.21	1
Mettl9	0.402631	-0.266125	0.487	0.484	1
Pou2f2	0.403823	0.403668	0.205	0.145	1
Cfh	0.404812	-1.28114	0.436	0.274	1
Trem1	0.406245	-0.518527	0.231	0.274	1
Wdr45	0.407336	-0.310098	0.128	0.177	1
Ndufb5	0.40735	-0.276284	0.692	0.645	1
Tmbim4	0.407717	-0.383717	0.436	0.435	1
AW112010	0.408761	0.407136	0.256	0.177	1
Naca	0.410459	-0.312085	0.974	1	1
Mvb12a	0.411556	-0.305076	0.179	0.226	1
Lims1	0.41167	-0.291024	0.513	0.565	1
Ctsd	0.413424	-0.326094	0.769	0.694	1
P3h4	0.413444	-0.254002	0.308	0.194	1
Nxn	0.413577	-0.265593	0.128	0.177	1
Thap7	0.413577	-0.361312	0.128	0.177	1
Isg15	0.415905	-0.840249	0.359	0.387	1
Arhgef28	0.417179	-0.412744	0.179	0.226	1
Scand1	0.41731	-0.283543	0.846	0.71	1
Arpc4	0.417402	-0.316056	0.564	0.548	1
Ptn	0.418537	-0.992331	0.256	0.29	1
Glrx	0.418803	-0.315933	0.205	0.258	1
Sh3gl1	0.419779	-0.262316	0.41	0.419	1
Bax	0.420928	-0.280489	0.436	0.435	1
Tubb2a	0.421788	-0.286332	0.487	0.5	1
Lcp1	0.421886	-0.480714	0.462	0.5	1
Atp6v0a2	0.422848	-0.262408	0.179	0.226	1
Dusp6	0.423351	0.28451	0.154	0.097	1
Naga	0.423789	-0.326853	0.154	0.194	1
Senp6	0.424309	-0.262285	0.564	0.532	1
Tmem128	0.424485	-0.276294	0.282	0.306	1
Cd52	0.426053	-0.69276	0.744	0.581	1
Jcad	0.426226	-0.260923	0.128	0.177	1
Fkbp8	0.428458	-0.337939	0.487	0.468	1
Micos10	0.429102	-0.261862	0.846	0.694	1
Atxn2l	0.429511	-0.261514	0.385	0.242	1
Dhrs9	0.429873	-0.317953	0.154	0.194	1
B3gnt9	0.429873	-0.350579	0.154	0.194	1
Rbis	0.430227	-0.41018	0.462	0.435	1
Fhl1	0.430473	-0.404024	0.462	0.452	1
Sirt2	0.43457	-0.309332	0.282	0.306	1
Rabggtb	0.435873	-0.271465	0.103	0.145	1
Syde1	0.435873	-0.315045	0.103	0.145	1
Raf1	0.437714	-0.259571	0.231	0.274	1
Cpq	0.438927	-0.305864	0.436	0.435	1
Gadd45g	0.439343	-0.996804	0.282	0.339	1
Tsen34	0.439435	-0.464963	0.487	0.435	1
Gmfg	0.441207	-0.574829	0.538	0.484	1
Tmem59	0.442173	-0.459262	0.769	0.694	1
Mrpl55	0.442191	-0.280953	0.154	0.194	1
Pfdn1	0.444287	-0.267097	0.385	0.419	1
Arl6ip5	0.449934	-0.321714	0.282	0.29	1
Extl2	0.450125	-0.331021	0.103	0.145	1
Osm	0.450263	-0.339869	0.205	0.274	1
Ccr1	0.451859	-0.297996	0.179	0.226	1
Mien1	0.451915	-0.352441	0.538	0.5	1
Cpe	0.451943	0.552876	0.103	0.065	1
Pgk1	0.453076	-0.315988	0.462	0.452	1
Copg1	0.453154	-0.274851	0.333	0.339	1
Naa20	0.455149	-0.435763	0.282	0.306	1
Stx8	0.456055	-0.25646	0.41	0.403	1
Tmem160	0.45688	-0.351381	0.59	0.516	1
Fcf1	0.458593	-0.275229	0.231	0.258	1
Tgm2	0.458819	-0.259212	0.128	0.177	1
Dnlz	0.459605	-0.250534	0.308	0.323	1
Cd14	0.46017	0.48004	0.179	0.129	1
Ralb	0.460378	-0.291985	0.282	0.306	1
Grpel1	0.462036	-0.326352	0.436	0.435	1
Pim1	0.464555	-0.273209	0.538	0.387	1
Mcur1	0.464608	-0.269532	0.205	0.242	1
Tmem229a	0.464638	-0.25443	0.103	0.145	1
Pigyl	0.465762	-0.260431	0.256	0.29	1
Mrps28	0.466042	-0.425417	0.359	0.355	1
Eif4e	0.466042	-0.401168	0.333	0.371	1
Mcl1	0.466759	-0.614616	0.744	0.629	1
Palld	0.469792	-0.352397	0.179	0.226	1
Mcee	0.469929	-0.313183	0.308	0.323	1
Car13	0.4715	-0.348783	0.077	0.113	1
Fam43a	0.4715	-0.331019	0.077	0.113	1
Ly6c2	0.472666	-0.274228	0.205	0.274	1
Akr1a1	0.473592	-0.45604	0.667	0.565	1
Prdx4	0.473614	-0.414501	0.436	0.419	1
Tiprl	0.475243	-0.378519	0.41	0.403	1
Comp	0.479827	-0.734859	0.077	0.113	1
Cd300lf	0.480335	-0.305694	0.154	0.194	1
Srsf9	0.480745	-0.37262	0.487	0.468	1
Cant1	0.480973	-0.393702	0.128	0.161	1
Tnfrsf1b	0.482188	-0.288395	0.205	0.242	1
Ndufb2	0.482392	-0.383174	0.564	0.516	1
Ndufa7	0.482524	-0.317709	0.821	0.726	1
Rab4b	0.483864	-0.28091	0.41	0.371	1
Esyt1	0.485652	-0.26403	0.308	0.323	1
Bzw1	0.485808	-0.611458	0.718	0.629	1
Gpx3	0.486742	-0.563156	0.59	0.548	1
Chchd1	0.486828	-0.299033	0.667	0.597	1
C2	0.488127	-0.29847	0.205	0.242	1
Gpx8	0.49018	-0.376668	0.487	0.468	1
Mmp23	0.493121	-0.287189	0.538	0.548	1
2810004N23Rik	0.49629	-0.404149	0.308	0.323	1
Nup133	0.496717	-0.280646	0.077	0.113	1
Ncf2	0.497899	-0.35885	0.308	0.339	1
Tank	0.498646	-0.264875	0.179	0.21	1
Smpd3	0.499056	-0.581329	0.769	0.645	1
Cd74	0.501512	-0.751579	0.308	0.21	1
Tmx1	0.501633	-0.319675	0.359	0.355	1
Mis12	0.502277	-0.304242	0.128	0.161	1
B2m	0.503024	-0.250001	0.897	0.952	1
Lilrb4a	0.504447	-0.599246	0.231	0.258	1
Mnat1	0.506179	-0.263777	0.205	0.242	1
Ttc33	0.507542	-0.308506	0.256	0.274	1
Ift43	0.508194	-0.311237	0.205	0.226	1
Rela	0.508571	-0.255312	0.41	0.274	1
N4bp2l1	0.509488	-0.255578	0.128	0.161	1
Xpa	0.510112	-0.290648	0.256	0.29	1
Clstn1	0.511258	-0.339994	0.333	0.323	1
Hic1	0.511455	-0.268469	0.179	0.21	1
Ssna1	0.514197	-0.301567	0.487	0.468	1
Dynll1	0.51421	-0.256973	0.974	0.903	1
Mpc1	0.514441	-0.292587	0.692	0.629	1
Tgfb1i1	0.516733	-0.412536	0.385	0.387	1
Akt2	0.517024	-0.307656	0.487	0.452	1
Snx6	0.51971	-0.267528	0.692	0.597	1
Gsr	0.522732	-0.765103	0.436	0.419	1
Glul	0.523892	-0.482625	0.513	0.516	1
Nudt9	0.524434	-0.25991	0.179	0.21	1
Gng10	0.529412	-0.258694	0.59	0.5	1
Rwdd1	0.529768	-0.292495	0.769	0.613	1
Ltb	0.530783	-0.31678	0.205	0.242	1
Ndufa4l2	0.531427	-0.381595	0.128	0.081	1
Serpinf1	0.532295	-0.643064	0.949	0.887	1
Msrb1	0.537598	-0.798294	0.538	0.516	1
Plpp1	0.538864	-0.298195	0.128	0.161	1
Iglc2	0.538864	-0.770084	0.179	0.129	1
Tpd52	0.542716	-0.355784	0.282	0.306	1
Gas1	0.544343	-0.661881	0.462	0.468	1
Cfp	0.546338	-0.294973	0.128	0.161	1
Snx3	0.547132	-0.274553	0.718	0.613	1
Ehd1	0.547801	-0.298381	0.564	0.532	1
Tuba1c	0.548516	-0.282995	0.256	0.274	1
Scarf2	0.549535	-0.319732	0.308	0.21	1
H2afv	0.550837	-0.425638	0.821	0.645	1
Nfyb	0.552487	-0.271502	0.205	0.226	1
[truncated: 268 more rows]

## Sheet: Sup Table 7
Supp Table 7 Periosteum Igf1high vs Igf1low	p_val	avg_log2FC	pct.1	pct.2	p_val_adj
Mrgprg	2.74213e-66	-1.41874	0.29	0.697	8.85295e-62
Igf1	2.36401e-64	1.25904	0.427	0.051	7.63222e-60
Pcolce	8.07216e-62	1.11821	0.676	0.27	2.6061e-57
Apod	9.17336e-59	1.26179	0.603	0.2	2.96162e-54
Itm2a	1.2285e-57	1.12628	0.561	0.165	3.9662e-53
Col3a1	1.70697e-46	0.919716	0.998	0.99	5.51096e-42
Daglb	1.99608e-45	-1.04217	0.613	0.792	6.44434e-41
Dmkn	2.05424e-40	-1.11647	0.287	0.58	6.63213e-36
Serping1	2.60845e-37	0.626791	0.949	0.837	8.42139e-33
Serpinf1	1.4856e-36	0.630307	0.947	0.758	4.79625e-32
Ly6a	1.62869e-36	0.461703	0.996	0.966	5.25822e-32
Col1a2	3.30677e-36	0.666026	0.999	0.997	1.06759e-31
Malat1	3.73308e-36	0.868212	0.951	0.848	1.20522e-31
Cdon	1.02952e-33	0.597874	0.505	0.192	3.32379e-29
Aebp1	5.4212e-33	0.645086	0.893	0.703	1.75023e-28
Man1a	1.4964e-32	0.594501	0.926	0.751	4.83113e-28
Gpx3	1.68648e-32	1.04339	0.612	0.334	5.44481e-28
Htra1	4.4398e-32	0.613504	0.896	0.68	1.43339e-27
Pcolce2	7.46201e-32	0.517019	0.946	0.834	2.40911e-27
mt-Atp6	8.18819e-32	0.523385	0.993	0.979	2.64356e-27
Col6a3	1.17164e-31	0.565615	0.882	0.632	3.78264e-27
Il11ra1	6.3139e-31	0.594668	0.716	0.39	2.03844e-26
Krtdap	1.28022e-30	-0.921657	0.503	0.697	4.13318e-26
Sfrp2	1.41971e-30	0.955226	0.771	0.579	4.58352e-26
Cd55	3.13263e-30	-0.62571	0.836	0.868	1.01137e-25
Fbln1	1.09691e-29	0.755368	0.564	0.283	3.54137e-25
Fbln2	2.98542e-29	0.673502	0.708	0.406	9.63842e-25
Gas1	4.79471e-29	0.72463	0.562	0.261	1.54797e-24
Peg3	1.19013e-28	0.631417	0.302	0.076	3.84232e-24
Ccdc80	2.21603e-28	0.632954	0.657	0.385	7.15447e-24
Col5a2	1.22504e-27	0.545068	0.877	0.713	3.95504e-23
Aspn	1.49899e-27	0.749773	0.714	0.47	4.8395e-23
Ace	7.24031e-27	0.514097	0.679	0.377	2.33753e-22
Thbs2	7.55696e-27	0.633583	0.571	0.293	2.43976e-22
Ogn	1.59334e-26	0.516601	0.964	0.885	5.1441e-22
Xist	1.92391e-26	0.625708	0.785	0.572	6.21135e-22
Igfbp5	2.6712e-26	-0.408033	0.989	0.997	8.62396e-22
Dcn	5.42677e-26	0.28804	1	0.999	1.75203e-21
mt-Nd2	5.68627e-26	0.488768	0.959	0.883	1.83581e-21
Adam33	1.56019e-25	0.527676	0.429	0.176	5.03708e-21
Ptx3	3.10895e-25	-1.04382	0.287	0.487	1.00373e-20
Cd34	5.60625e-25	-0.319478	0.991	0.993	1.80998e-20
Ccn3	7.75426e-25	-0.607152	0.783	0.873	2.50346e-20
Ptn	2.18527e-24	0.729868	0.293	0.085	7.05515e-20
mt-Nd1	2.54737e-24	0.464008	0.959	0.887	8.22419e-20
Angptl1	4.26471e-24	0.516136	0.197	0.03	1.37686e-19
Itm2b	6.83399e-24	0.371255	0.976	0.907	2.20635e-19
mt-Co3	9.89518e-24	0.461409	0.994	0.985	3.19466e-19
Gm26771	1.008e-23	0.464804	0.224	0.045	3.25431e-19
Selenop	1.94807e-23	0.477598	0.865	0.631	6.28933e-19
Mir99ahg	2.9245e-23	0.469774	0.379	0.145	9.44175e-19
Kcnq1ot1	3.52223e-23	0.654056	0.573	0.317	1.13715e-18
Ifitm2	6.18766e-23	0.432338	0.946	0.799	1.99768e-18
Sparc	7.25832e-23	0.404862	0.998	0.99	2.34335e-18
Lama2	8.10115e-23	0.541205	0.649	0.392	2.61546e-18
Col1a1	1.62961e-22	0.57734	0.993	0.99	5.26119e-18
Tmsb4x	3.12447e-22	-0.325191	0.999	0.999	1.00873e-17
Srpx2	3.34612e-22	0.387584	0.289	0.087	1.0803e-17
Ly6c1	3.66152e-22	0.369192	0.976	0.906	1.18212e-17
Rpl37a	3.92212e-22	-0.270393	1	0.999	1.26626e-17
Plpp3	1.42815e-21	0.449114	0.981	0.969	4.61079e-17
Slc16a2	2.35129e-21	0.346528	0.186	0.031	7.59115e-17
Fhl1	3.32134e-21	-0.631678	0.624	0.717	1.07229e-16
Basp1	3.46582e-21	-0.572919	0.786	0.842	1.11894e-16
Gpc3	7.33686e-21	0.551545	0.837	0.68	2.36871e-16
Sbsn	8.94027e-21	-0.623393	0.673	0.782	2.88637e-16
Gpnmb	1.00047e-20	0.455841	0.315	0.115	3.23002e-16
Pdgfra	1.02868e-20	0.443955	0.786	0.524	3.3211e-16
Fgl2	2.10264e-20	0.515624	0.411	0.182	6.78836e-16
Rpl12	4.23608e-20	0.357841	0.977	0.941	1.36762e-15
Kcnj8	8.60682e-20	0.317512	0.137	0.011	2.77871e-15
mt-Nd4	8.68198e-20	0.333031	0.978	0.938	2.80298e-15
Cxcl13	1.01862e-19	1.18414	0.369	0.168	3.28861e-15
Rps15	1.72184e-19	0.414072	0.976	0.925	5.55895e-15
Calr	3.50116e-19	0.415551	0.89	0.751	1.13035e-14
Rbp1	4.97555e-19	0.444087	0.255	0.08	1.60636e-14
Smpd3	6.09089e-19	-0.457811	0.97	0.983	1.96645e-14
Dpep1	6.54449e-19	0.436585	0.838	0.656	2.11289e-14
Gstm1	6.5746e-19	0.420766	0.859	0.651	2.12261e-14
Igfbp7	8.83068e-19	0.501675	0.193	0.045	2.85098e-14
Abcc9	3.26314e-18	0.288027	0.158	0.025	1.05351e-13
Lamb2	3.32774e-18	0.38604	0.744	0.482	1.07436e-13
Lpar4	4.94639e-18	0.292308	0.331	0.13	1.59694e-13
Aif1l	6.06885e-18	-0.535344	0.647	0.741	1.95933e-13
Cryab	6.45169e-18	0.373357	0.386	0.175	2.08293e-13
Col6a6	7.3301e-18	0.379018	0.502	0.255	2.36652e-13
Abca8a	1.23684e-17	0.471854	0.308	0.121	3.99314e-13
mt-Co1	1.40965e-17	0.269869	0.994	0.987	4.55105e-13
Rpl41	2.53445e-17	-0.293929	1	0.999	8.18246e-13
Sfrp4	3.36075e-17	0.692561	0.53	0.304	1.08502e-12
Col4a5	5.13966e-17	0.287934	0.166	0.034	1.65934e-12
Col4a1	5.41819e-17	0.510375	0.359	0.162	1.74926e-12
Itgb7	9.23757e-17	-0.565803	0.11	0.261	2.98235e-12
Cfh	9.81004e-17	0.353578	0.192	0.049	3.16717e-12
Wnt5a	1.14422e-16	0.400973	0.379	0.176	3.69411e-12
Cd63	1.55693e-16	0.380533	0.877	0.704	5.02656e-12
Nid1	1.67345e-16	0.407585	0.953	0.921	5.40272e-12
Tmsb10	1.78283e-16	-0.310428	0.988	0.975	5.75587e-12
Meg3	2.26374e-16	0.671557	0.743	0.614	7.30848e-12
C4b	2.27781e-16	0.511421	0.184	0.048	7.3539e-12
Neo1	2.39434e-16	0.34154	0.407	0.199	7.73014e-12
Htra3	2.57714e-16	-0.47029	0.847	0.854	8.32029e-12
Laptm4a	4.68853e-16	0.345956	0.908	0.787	1.51369e-11
Lox	4.78362e-16	0.329487	0.267	0.099	1.54439e-11
Pnisr	5.75747e-16	0.28876	0.429	0.213	1.8588e-11
Duox2	6.73478e-16	-0.489856	0.05	0.17	2.17432e-11
Adm	7.43523e-16	0.261682	0.154	0.031	2.40046e-11
Ntrk2	7.65132e-16	0.382609	0.298	0.121	2.47023e-11
Pid1	8.81145e-16	0.360673	0.319	0.138	2.84478e-11
Cp	9.9538e-16	0.295567	0.152	0.031	3.21358e-11
Neat1	1.02905e-15	0.517239	0.687	0.479	3.32229e-11
Abca9	1.23019e-15	0.442114	0.436	0.235	3.97168e-11
Tmem229a	1.55342e-15	-0.603617	0.15	0.297	5.01521e-11
Arrdc3	2.71048e-15	0.35182	0.3	0.125	8.75079e-11
Pmepa1	3.03598e-15	0.342642	0.546	0.31	9.80165e-11
Adam23	3.62038e-15	0.289368	0.301	0.124	1.16884e-10
Cpxm1	3.90414e-15	0.440645	0.576	0.363	1.26045e-10
Clec3b	3.96351e-15	0.266237	0.982	0.956	1.27962e-10
Lamc1	4.06047e-15	0.347775	0.807	0.603	1.31092e-10
Tnxb	4.30598e-15	0.346072	0.942	0.83	1.39019e-10
Ccl8	4.90271e-15	0.444765	0.262	0.104	1.58284e-10
Rps24	8.11782e-15	-0.252995	0.999	0.994	2.62084e-10
Cpz	8.71795e-15	0.267924	0.162	0.039	2.81459e-10
Rian	1.35945e-14	0.347336	0.488	0.276	4.389e-10
Ism1	1.83532e-14	0.350287	0.196	0.062	5.92532e-10
Ppl	2.16129e-14	0.376332	0.208	0.07	6.97773e-10
Ctsl	3.10265e-14	0.333678	0.934	0.803	1.00169e-09
Mfap2	3.55796e-14	0.333033	0.516	0.314	1.14869e-09
Cebpd	4.17474e-14	0.701996	0.577	0.386	1.34782e-09
Gm10115	4.34254e-14	0.333294	0.267	0.111	1.40199e-09
mt-Nd3	4.43578e-14	0.351314	0.776	0.585	1.43209e-09
Ltbp4	5.82589e-14	0.365796	0.407	0.22	1.88089e-09
Lrrc17	7.34789e-14	0.270724	0.621	0.375	2.37227e-09
Lamp2	8.09915e-14	0.342832	0.822	0.631	2.61481e-09
Il33	9.22322e-14	-0.619201	0.516	0.623	2.97772e-09
Klf9	9.62008e-14	0.360005	0.638	0.424	3.10584e-09
Plagl1	9.6839e-14	0.251579	0.237	0.089	3.12645e-09
Ebf1	9.86069e-14	0.301356	0.971	0.9	3.18353e-09
Gan	1.01088e-13	-0.682307	0.279	0.406	3.26362e-09
Mgst1	1.02983e-13	0.313797	0.775	0.541	3.3248e-09
Ctsb	1.03279e-13	0.262097	0.899	0.725	3.33437e-09
Mir100hg	2.2501e-13	0.32805	0.419	0.232	7.26445e-09
Lbp	2.63847e-13	0.310828	0.324	0.156	8.5183e-09
Lpl	3.08255e-13	0.409629	0.688	0.487	9.95201e-09
Ctsk	3.15045e-13	0.303878	0.587	0.362	1.01712e-08
Ttc14	3.31639e-13	0.305645	0.37	0.187	1.0707e-08
C1ra	3.36223e-13	0.310477	0.569	0.348	1.0855e-08
Chrdl1	4.22103e-13	0.345613	0.798	0.624	1.36276e-08
Rarres2	4.65728e-13	0.360664	0.914	0.779	1.5036e-08
Rsrp1	5.07469e-13	0.306226	0.675	0.462	1.63836e-08
Pik3r1	5.38722e-13	0.333105	0.568	0.361	1.73926e-08
Fth1	6.307e-13	0.311473	0.996	0.987	2.03621e-08
Steap3	6.47216e-13	0.338128	0.724	0.524	2.08954e-08
Anxa5	6.92423e-13	0.28453	0.849	0.659	2.23549e-08
Luc7l2	8.48051e-13	0.303882	0.688	0.47	2.73793e-08
Fus	9.07966e-13	0.277375	0.721	0.503	2.93137e-08
Ccnd2	1.09601e-12	0.355692	0.42	0.238	3.53848e-08
Ogt	1.12459e-12	0.258775	0.431	0.232	3.63074e-08
Oat	1.13383e-12	0.283949	0.696	0.461	3.66057e-08
Rrbp1	1.2395e-12	0.314685	0.899	0.751	4.00172e-08
Birc6	1.28335e-12	0.275591	0.456	0.259	4.14329e-08
Cyp1b1	1.36365e-12	0.267899	0.133	0.031	4.40253e-08
Mmp2	1.53916e-12	0.306091	0.953	0.869	4.96919e-08
Tubb2a	2.00797e-12	0.351452	0.509	0.306	6.48273e-08
Map4k4	2.27765e-12	0.271772	0.419	0.228	7.35339e-08
Nova1	3.63313e-12	0.306297	0.623	0.41	1.17296e-07
Adamtsl1	3.71531e-12	0.322401	0.545	0.344	1.19949e-07
Srsf11	3.84236e-12	0.250936	0.545	0.324	1.24051e-07
Tmeff2	4.61872e-12	0.302756	0.607	0.406	1.49115e-07
Vldlr	5.55063e-12	0.276042	0.491	0.294	1.79202e-07
Dkk2	7.13235e-12	0.378482	0.141	0.039	2.30268e-07
Hba-a1	7.48765e-12	0.88259	0.152	0.044	2.41739e-07
Tgfbr3	7.49808e-12	0.260361	0.716	0.499	2.42075e-07
Slc38a2	7.65563e-12	0.262195	0.44	0.249	2.47162e-07
Il1r2	8.07545e-12	0.321131	0.234	0.099	2.60716e-07
Rps25	9.55045e-12	0.255755	0.964	0.938	3.08336e-07
Sned1	1.10628e-11	0.287541	0.226	0.093	3.57163e-07
Wnt2	1.80674e-11	-0.467503	0.607	0.672	5.83305e-07
Nbeal1	1.93622e-11	0.258493	0.415	0.231	6.25109e-07
Ddx5	2.29279e-11	0.298276	0.878	0.728	7.40229e-07
Fkbp7	2.35198e-11	0.288324	0.448	0.265	7.59336e-07
Tmem59	2.73793e-11	0.282309	0.652	0.441	8.83941e-07
Ccl7	2.84433e-11	-0.789779	0.318	0.445	9.18291e-07
Hmgb1	3.17154e-11	0.282046	0.859	0.68	1.02393e-06
Reck	3.51929e-11	0.284564	0.475	0.29	1.1362e-06
Prss23	3.54602e-11	-0.310291	0.953	0.939	1.14483e-06
Cygb	3.69503e-11	0.423801	0.235	0.106	1.19294e-06
Igsf10	4.24978e-11	0.273978	0.344	0.182	1.37204e-06
Rbms3	4.26813e-11	0.251837	0.635	0.434	1.37797e-06
Arf4	6.11915e-11	0.277437	0.794	0.593	1.97557e-06
Lgals3bp	7.42303e-11	0.327833	0.494	0.318	2.39652e-06
Hbb-bs	7.91637e-11	1.48073	0.37	0.203	2.5558e-06
Pla1a	9.57491e-11	-0.562027	0.314	0.427	3.09126e-06
Lama4	9.99454e-11	0.312106	0.687	0.5	3.22674e-06
C430049B03Rik	1.01234e-10	0.345363	0.182	0.07	3.26834e-06
Klf7	1.10316e-10	0.261005	0.432	0.255	3.56155e-06
Tmed9	1.15249e-10	0.265484	0.622	0.408	3.72081e-06
Egfr	1.34075e-10	0.26931	0.421	0.248	4.3286e-06
Ifi27	1.36172e-10	0.255815	0.432	0.252	4.39632e-06
Dact2	1.46206e-10	-0.563377	0.3	0.407	4.72027e-06
Ccl2	1.63014e-10	-0.629308	0.104	0.215	5.26292e-06
Ccn1	1.6976e-10	-0.642066	0.324	0.455	5.48069e-06
Aldh1a3	1.76812e-10	-0.518114	0.57	0.634	5.70838e-06
Cnpy2	7.39682e-10	0.257807	0.604	0.406	2.38806e-05
Ecm2	8.42958e-10	0.255001	0.286	0.145	2.72149e-05
Dpp4	8.96095e-10	0.260519	0.922	0.841	2.89304e-05
Rcn3	9.30774e-10	0.256212	0.622	0.42	3.005e-05
Top1	9.60468e-10	0.257115	0.501	0.315	3.10087e-05
Id2	1.29944e-09	0.264254	0.325	0.177	4.19525e-05
Hba-a2	1.76386e-09	0.789985	0.127	0.039	5.69462e-05
Rpl35	1.83155e-09	-0.279992	0.961	0.928	5.91315e-05
Asap1	2.64788e-09	0.288979	0.537	0.359	8.54869e-05
Akr1c18	2.73211e-09	-0.451981	0.387	0.51	8.82062e-05
Smoc2	2.90107e-09	0.292706	0.166	0.068	9.3661e-05
Emp3	3.3424e-09	0.271085	0.895	0.742	0.000107909
Lgals1	3.50336e-09	0.291459	0.982	0.903	0.000113106
Rabac1	5.64735e-09	0.265834	0.785	0.61	0.000182325
Myoc	5.87892e-09	0.909563	0.191	0.09	0.000189801
Ablim1	5.98117e-09	0.261455	0.814	0.646	0.000193102
Ifitm3	9.22946e-09	0.30921	0.974	0.903	0.000297973
Mat2a	1.11966e-08	0.322218	0.609	0.43	0.000361483
Socs3	1.39722e-08	0.344539	0.401	0.258	0.000451091
Cd200	1.43509e-08	-0.431593	0.14	0.235	0.000463319
Hbb-bt	1.90512e-08	0.50908	0.148	0.056	0.000615068
Mt2	1.98045e-08	-0.439088	0.671	0.706	0.000639389
Ar	2.50213e-08	0.283193	0.91	0.82	0.000807811
Mmp3	2.81692e-08	0.512698	0.105	0.032	0.000909443
Arhgap20	3.57668e-08	0.272995	0.647	0.473	0.00115473
Chst1	4.08597e-08	-0.451223	0.331	0.42	0.00131916
Thy1	4.56354e-08	-0.320151	0.738	0.746	0.00147334
Man2a1	6.42389e-08	0.253519	0.717	0.546	0.00207395
Slit3	8.03954e-08	0.250714	0.598	0.427	0.00259557
Ackr3	1.01346e-07	-0.31933	0.873	0.834	0.00327195
Procr	1.07345e-07	0.260968	0.539	0.385	0.00346564
Csrp2	1.27923e-07	0.265673	0.792	0.632	0.00413
Il34	1.37054e-07	-0.437966	0.319	0.4	0.00442479
Fmo2	1.987e-07	0.25501	0.174	0.083	0.00641504
Duox1	2.4095e-07	-0.427037	0.284	0.373	0.00777908
Fn1	2.78526e-07	-0.306758	0.992	0.999	0.00899223
S100a16	2.87908e-07	-0.317553	0.886	0.862	0.00929512
Car8	8.03984e-07	-0.411694	0.493	0.531	0.0259566
Lgals3	8.48492e-07	0.356177	0.503	0.368	0.0273936
D630033O11Rik	9.40546e-07	-0.403491	0.259	0.346	0.0303655
Sord	1.05113e-06	-0.404659	0.251	0.328	0.0339357
Nfkbia	2.78044e-06	-0.526341	0.553	0.599	0.0897664
Eif4g2	3.35592e-06	-0.269854	0.863	0.817	0.108346
Arl4c	1.07408e-05	-0.292365	0.057	0.115	0.346765
Gngt2	1.45984e-05	-0.321753	0.619	0.624	0.471309
Hdac7	2.07494e-05	-0.357662	0.633	0.635	0.669895
S100a4	2.21146e-05	0.369765	0.423	0.314	0.713969
Dusp1	2.53421e-05	-0.449693	0.611	0.658	0.818169
Arhgef28	2.58487e-05	-0.347359	0.236	0.303	0.834526
Gadd45g	3.38149e-05	0.266136	0.238	0.152	1
Il4ra	3.87148e-05	-0.337769	0.493	0.537	1
S1pr3	4.05408e-05	-0.321521	0.101	0.165	1
Osr1	5.1142e-05	-0.344083	0.71	0.694	1
Bgn	5.80796e-05	0.330633	0.121	0.062	1
Mmp14	7.24237e-05	-0.372604	0.834	0.78	1
Nhsl1	8.91555e-05	-0.338758	0.481	0.503	1
Dact1	0.000135518	-0.388463	0.589	0.582	1
Ntn4	0.000183883	-0.372441	0.388	0.421	1
Hes1	0.000246297	-0.255554	0.075	0.125	1
Ptp4a2	0.000246574	-0.264138	0.885	0.837	1
Gm42418	0.000279851	-0.806494	1	1	1	excluded
Arhgap29	0.000362688	-0.262215	0.686	0.666	1
Camk2n1	0.000945012	-0.30961	0.609	0.601	1
Rhoq	0.00105865	-0.280143	0.519	0.527	1
Pmm1	0.00247848	-0.331366	0.32	0.352	1
Ptgs1	0.00268378	-0.319459	0.433	0.449	1
Has1	0.00275325	0.312678	0.184	0.13	1
Akr1b8	0.00282445	-0.284476	0.298	0.327	1
Efhd1	0.0029238	-0.272868	0.71	0.672	1
Fosb	0.00299641	0.25384	0.521	0.441	1
Ppa1	0.00330395	-0.258834	0.472	0.476	1
Ifitm1	0.00458859	0.342203	0.119	0.076	1
Rab32	0.00496906	-0.264986	0.222	0.261	1
Ndrg1	0.00508907	-0.306661	0.247	0.287	1
Ehd1	0.00533297	-0.272237	0.613	0.585	1
Rala	0.00561678	-0.265514	0.531	0.518	1
Smurf1	0.00582731	-0.262877	0.249	0.282	1
Nr4a1	0.00626988	-0.290664	0.196	0.241	1
Pi15	0.008722	-0.305678	0.416	0.432	1
Glce	0.0110103	-0.273808	0.503	0.493	1
Fzd10os	0.0128115	-0.260303	0.313	0.331	1
Tnfaip6	0.018852	-0.278243	0.411	0.425	1
Ier2	0.0190569	-0.342886	0.525	0.562	1
Plac8	0.033276	0.358372	0.503	0.448	1
Guk1	0.0342161	-0.266723	0.4	0.393	1
Islr2	0.0394582	-0.261269	0.367	0.375	1
Cox17	0.0529153	-0.318717	0.38	0.373	1
Vasn	0.0565264	-0.294961	0.646	0.597	1
Chp1	0.0671999	-0.26425	0.422	0.404	1
Fam126a	0.0675539	-0.305582	0.38	0.375	1
Jag1	0.0708701	-0.271379	0.239	0.255	1
Wnt10b	0.107489	-0.269001	0.26	0.266	1
S100a9	0.11319	-0.327591	0.376	0.354	1
Cdc42ep2	0.124242	-0.253847	0.47	0.441	1
Rab7b	0.159292	-0.270981	0.485	0.442	1
S100a8	0.822702	-0.252324	0.31	0.277	1

## Sheet: Sup Table 8
Supp Table 8 Proliferating vs Nonproliferating CD90	p_val	avg_log2FC	pct.1	pct.2	p_val_adj
Cenpf	1.12471e-15	1.58114	0.448	0	3.63111e-11
Cdca3	1.12471e-15	1.13183	0.448	0	3.63111e-11
Lockd	1.12471e-15	1.15048	0.448	0	3.63111e-11
Incenp	1.86842e-15	1.10629	0.483	0.008	6.03221e-11
Mki67	3.3868e-14	2.44525	0.552	0.038	1.09343e-09
Top2a	1.35886e-13	2.21838	0.483	0.023	4.38709e-09
Hist1h1b	1.61814e-13	3.75726	0.621	0.068	5.22418e-09
Ncapd3	1.96714e-13	0.923261	0.483	0.023	6.35091e-09
Cdca8	2.42279e-13	1.54866	0.379	0	7.82198e-09
Pclaf	2.42279e-13	1.8495	0.379	0	7.82198e-09
Birc5	2.42279e-13	1.40911	0.379	0	7.82198e-09
Hist1h2an	2.42279e-13	1.00057	0.379	0	7.82198e-09
Nusap1	2.71903e-13	1.47582	0.414	0.008	8.77839e-09
Smc2	5.83315e-13	1.07163	0.586	0.053	1.88323e-08
Stmn1	1.343e-12	2.64388	0.586	0.068	4.33586e-08
Hist1h1a	2.78878e-12	1.44299	0.414	0.015	9.00359e-08
Ckap2l	3.40612e-12	0.758161	0.345	0	1.09966e-07
Ccnb2	3.40612e-12	0.661793	0.345	0	1.09966e-07
Cdk1	3.40612e-12	0.929338	0.345	0	1.09966e-07
Rrm2	3.40612e-12	1.23742	0.345	0	1.09966e-07
Hist1h2ae	3.40612e-12	1.87177	0.345	0	1.09966e-07
Hist1h3c	3.40612e-12	1.39573	0.345	0	1.09966e-07
Esco2	3.40612e-12	0.765053	0.345	0	1.09966e-07
Kif11	3.40612e-12	0.716642	0.345	0	1.09966e-07
Prc1	4.25007e-12	0.889253	0.448	0.023	1.37214e-07
Knl1	6.86952e-12	0.8473	0.379	0.008	2.21783e-07
Mcm7	1.20947e-11	0.897391	0.483	0.038	3.90478e-07
Gmnn	3.59159e-11	0.80661	0.448	0.03	1.15955e-06
H2afx	4.28013e-11	2.48009	0.517	0.06	1.38184e-06
Sgo2a	4.66013e-11	0.485407	0.31	0	1.50452e-06
Tpx2	4.66013e-11	1.07524	0.31	0	1.50452e-06
Ccna2	4.66013e-11	0.687341	0.31	0	1.50452e-06
Hist2h2bb	4.66013e-11	0.970011	0.31	0	1.50452e-06
Plk1	4.66013e-11	0.346693	0.31	0	1.50452e-06
Kif22	4.66013e-11	0.782805	0.31	0	1.50452e-06
Asf1b	4.66013e-11	0.8674	0.31	0	1.50452e-06
Pbk	4.66013e-11	0.431884	0.31	0	1.50452e-06
Smc4	4.94456e-11	1.92748	0.69	0.158	1.59635e-06
Spc24	6.50281e-11	0.788205	0.345	0.008	2.09943e-06
Wdr76	7.51041e-11	0.767173	0.379	0.015	2.42474e-06
Diaph3	1.02156e-10	0.500108	0.379	0.015	3.29812e-06
Slc16a1	1.69484e-10	0.637299	0.552	0.068	5.47179e-06
Rrm1	1.81994e-10	1.09369	0.621	0.105	5.87566e-06
Rnps1	3.14301e-10	0.805029	0.69	0.135	1.01472e-05
Ube2c	5.60164e-10	1.4585	0.345	0.015	1.80849e-05
Hist1h1d	5.6295e-10	1.33984	0.448	0.045	1.81749e-05
Ncapg2	6.0098e-10	0.774607	0.414	0.03	1.94026e-05
Nuf2	6.21383e-10	0.298338	0.276	0	2.00613e-05
Ncaph	6.21383e-10	0.394347	0.276	0	2.00613e-05
Depdc1a	6.21383e-10	0.734907	0.276	0	2.00613e-05
Hist1h2bb	6.21383e-10	0.422322	0.276	0	2.00613e-05
Tyms	7.14865e-10	1.1329	0.345	0.015	2.30794e-05
Tfrc	7.75914e-10	0.800453	0.379	0.023	2.50504e-05
Kif15	8.37437e-10	0.506125	0.31	0.008	2.70366e-05
Clspn	9.72134e-10	0.728936	0.379	0.023	3.13853e-05
Aspm	1.02004e-09	0.482707	0.31	0.008	3.2932e-05
Spc25	1.02004e-09	0.642804	0.31	0.008	3.2932e-05
Sgo1	1.16277e-09	0.382166	0.31	0.008	3.754e-05
Racgap1	1.3875e-09	0.436172	0.345	0.015	4.47954e-05
Mcm5	1.47292e-09	0.540706	0.345	0.015	4.75533e-05
Ezh2	3.86226e-09	1.20255	0.552	0.098	0.000124693
Hist1h3e	6.4252e-09	0.813641	0.345	0.023	0.000207438
Nek2	8.08992e-09	0.268981	0.241	0	0.000261183
Bub1	8.08992e-09	0.380746	0.241	0	0.000261183
Cdc20	8.08992e-09	0.373076	0.241	0	0.000261183
Ttk	8.08992e-09	0.385168	0.241	0	0.000261183
Hmmr	8.08992e-09	0.662217	0.241	0	0.000261183
Aurkb	8.08992e-09	0.368387	0.241	0	0.000261183
Gen1	8.08992e-09	0.309443	0.241	0	0.000261183
Hist1h2bj	8.08992e-09	0.389856	0.241	0	0.000261183
Hist1h2af	8.08992e-09	0.83147	0.241	0	0.000261183
Ndc80	1.00275e-08	0.54735	0.31	0.015	0.000323738
Cenpe	1.04682e-08	0.702772	0.276	0.008	0.000337965
Hist1h2ab	1.04682e-08	0.647004	0.276	0.008	0.000337965
Dlgap5	1.04682e-08	0.355111	0.276	0.008	0.000337965
Fbxo5	1.06371e-08	0.600057	0.31	0.015	0.000343418
Kif18a	1.11684e-08	0.701464	0.276	0.008	0.000360571
Trim59	1.19661e-08	0.528524	0.31	0.015	0.000386324
Tk1	1.35531e-08	0.400603	0.276	0.008	0.000437563
Chaf1a	1.44529e-08	0.435159	0.276	0.008	0.000466611
Nup210	1.46006e-08	0.378597	0.345	0.023	0.000471379
Mad2l1	1.54105e-08	0.305984	0.276	0.008	0.000497528
Cdkn3	1.54105e-08	0.523429	0.276	0.008	0.000497528
Tipin	3.58598e-08	0.786846	0.552	0.105	0.00115773
Tubb4b	4.22449e-08	1.11312	0.828	0.353	0.00136388
Cdca4	5.98811e-08	0.525503	0.345	0.03	0.00193326
Suz12	8.22009e-08	0.660191	0.655	0.158	0.00265386
Hist1h4c	9.28958e-08	0.36295	0.31	0.023	0.00299914
Ncapg	1.03094e-07	0.320554	0.207	0	0.00332839
AI480526	1.03094e-07	0.278298	0.207	0	0.00332839
Ckap2	1.03094e-07	0.283822	0.207	0	0.00332839
Ifrd2	1.03094e-07	0.398171	0.207	0	0.00332839
Hist1h2bh	1.03094e-07	0.320402	0.207	0	0.00332839
Mxd3	1.03094e-07	0.631405	0.207	0	0.00332839
Cenpm	1.03094e-07	0.276401	0.207	0	0.00332839
Ska1	1.03094e-07	0.261894	0.207	0	0.00332839
Alas2	1.03094e-07	0.626235	0.207	0	0.00332839
Mcm3	1.08886e-07	0.633308	0.31	0.023	0.00351537
Traf3ip2	1.14785e-07	0.335019	0.31	0.023	0.00370582
Bub1b	1.35367e-07	0.77131	0.241	0.008	0.00437031
Dnmt1	1.42434e-07	0.901123	0.621	0.15	0.00459847
Hist1h2bn	1.44219e-07	0.48132	0.241	0.008	0.00465612
Tpt1	1.54553e-07	0.678077	1	0.985	0.00498974
Hist1h3i	1.63635e-07	0.620985	0.241	0.008	0.00528294
Ska2	1.74267e-07	0.323184	0.241	0.008	0.00562622
Nrk	1.75958e-07	0.319431	0.414	0.053	0.00568081
Brca2	1.85566e-07	0.281763	0.241	0.008	0.00599101
Kif4	1.97572e-07	0.326416	0.241	0.008	0.00637862
Mcm6	2.04575e-07	0.687565	0.414	0.06	0.0066047
Dek	2.07568e-07	1.70833	0.897	0.459	0.00670133
Anp32b	2.73906e-07	1.47391	0.897	0.534	0.00884305
Cmc2	3.17675e-07	0.471646	0.517	0.098	0.0102561
Wdr77	3.24363e-07	0.443178	0.345	0.038	0.0104721
Tmem108	3.89625e-07	0.554158	0.345	0.038	0.012579
Banf1	4.21785e-07	0.85573	0.655	0.188	0.0136173
Dut	5.24134e-07	1.10332	0.552	0.135	0.0169217
Cdc25b	6.20504e-07	0.48723	0.379	0.053	0.020033
Nasp	8.21078e-07	0.930079	0.483	0.105	0.0265085
Exosc9	1.07925e-06	0.360653	0.379	0.053	0.0348435
Hmgb3	1.18158e-06	0.381445	0.276	0.023	0.0381473
Knstrn	1.29057e-06	0.306856	0.172	0	0.0416661
Kif2c	1.29057e-06	0.290137	0.172	0	0.0416661
Rhd	1.29057e-06	0.849819	0.172	0	0.0416661
Kel	1.29057e-06	0.29774	0.172	0	0.0416661
Fignl1	1.29057e-06	0.260062	0.172	0	0.0416661
Cdc6	1.29057e-06	0.296407	0.172	0	0.0416661
Hist1h2bm	1.29057e-06	0.441052	0.172	0	0.0416661
Hist1h3f	1.29057e-06	0.256049	0.172	0	0.0416661
Hist1h3b	1.29057e-06	0.282772	0.172	0	0.0416661
Ccnb1	1.29057e-06	0.35179	0.172	0	0.0416661
Cenpk	1.29057e-06	0.42856	0.172	0	0.0416661
Cep55	1.29057e-06	0.263757	0.172	0	0.0416661
Pola1	1.60497e-06	0.350235	0.345	0.045	0.0518165
Anapc15	1.64266e-06	0.518724	0.379	0.06	0.0530332
Cenpw	1.68889e-06	0.398808	0.241	0.015	0.0545259
Cenpa	1.76651e-06	1.14263	0.379	0.068	0.0570318
Dbf4	1.80176e-06	0.304958	0.207	0.008	0.0581699
E2f8	1.80176e-06	0.353415	0.207	0.008	0.0581699
Wdhd1	1.80176e-06	0.252493	0.207	0.008	0.0581699
Ncapd2	1.82059e-06	0.363248	0.345	0.045	0.0587776
Neil3	1.88416e-06	0.26427	0.241	0.015	0.0608301
Tspan33	1.91613e-06	0.375634	0.207	0.008	0.0618624
Mis18bp1	1.91613e-06	0.357688	0.207	0.008	0.0618624
Cenpp	1.91613e-06	0.318192	0.207	0.008	0.0618624
Cip2a	1.91613e-06	0.311879	0.207	0.008	0.0618624
Uhrf1	1.91613e-06	0.539656	0.207	0.008	0.0618624
Mtbp	1.98975e-06	0.27842	0.241	0.015	0.0642392
Nxpe2	2.03746e-06	0.550897	0.207	0.008	0.0657794
Cchcr1	2.03746e-06	0.327646	0.207	0.008	0.0657794
Cep57	2.17015e-06	0.390456	0.448	0.083	0.0700632
Nsd2	2.21915e-06	0.793244	0.517	0.128	0.0716452
Rad51	2.30262e-06	0.355724	0.207	0.008	0.0743401
Tacc3	2.34175e-06	0.380496	0.241	0.015	0.0756034
Anp32e	2.7163e-06	1.0144	0.724	0.271	0.0876957
Kdm6a	2.96008e-06	0.406407	0.552	0.135	0.095566
H3f3a	3.13457e-06	1.00628	1	0.947	0.101199
Ube2j1	3.22868e-06	0.395156	0.517	0.113	0.104238
Hnrnpa2b1	3.2435e-06	0.770626	0.966	0.752	0.104716
Mid1	3.7319e-06	0.365445	0.31	0.038	0.120484
Mpnd	4.24755e-06	0.268884	0.31	0.038	0.137132
Car2	4.33976e-06	2.22015	0.276	0.03	0.140109
Pou2af1	4.34082e-06	0.709715	0.448	0.098	0.140143
Ddx39	4.90134e-06	0.732892	0.517	0.128	0.15824
Pmf1	5.14068e-06	0.661052	0.448	0.09	0.165967
Il7r	5.58714e-06	0.815974	0.379	0.068	0.180381
Ino80d	5.63308e-06	0.438135	0.621	0.165	0.181864
Sinhcaf	7.73736e-06	0.464653	0.241	0.023	0.249801
Rack1	8.25672e-06	0.713837	1	0.88	0.266568
Tcf3	8.85396e-06	0.820065	0.517	0.143	0.28585
Hist1h4h	9.8721e-06	0.476667	0.241	0.023	0.318721
AI662270	1.04261e-05	0.477448	0.414	0.09	0.336606
Rpl12	1.05793e-05	0.759241	1	0.902	0.341552
Kcnq1ot1	1.13204e-05	0.840087	0.897	0.414	0.365481
Agfg2	1.31221e-05	0.653229	0.379	0.083	0.423646
Hist2h2ac	1.53015e-05	1.44367	0.414	0.105	0.494007
Cks2	1.55276e-05	0.885359	0.448	0.12	0.50131
Cldn13	1.59597e-05	0.261432	0.138	0	0.515257
Snca	1.59597e-05	0.55833	0.138	0	0.515257
Add2	1.59597e-05	0.403571	0.138	0	0.515257
Gypa	1.59597e-05	1.01935	0.138	0	0.515257
Slc4a1	1.59597e-05	0.78773	0.138	0	0.515257
Sptb	1.59597e-05	0.252802	0.138	0	0.515257
Efcab11	1.59597e-05	0.534756	0.138	0	0.515257
Cenph	1.59597e-05	0.429041	0.138	0	0.515257
Trim10	1.59597e-05	0.262988	0.138	0	0.515257
Rbl1	1.63706e-05	0.534952	0.31	0.045	0.528525
Cks1b	1.71702e-05	0.767128	0.517	0.158	0.554339
Itga4	1.73965e-05	0.592815	0.586	0.18	0.561647
Ucp2	1.79892e-05	1.07583	0.828	0.376	0.580781
Wee1	1.89864e-05	0.278248	0.207	0.015	0.612975
Zfp563	2.00034e-05	0.25026	0.207	0.015	0.64581
Cdc45	2.04777e-05	0.257601	0.172	0.008	0.661121
Atad2	2.06515e-05	0.676012	0.483	0.128	0.666735
Nrm	2.0756e-05	0.640884	0.276	0.038	0.670106
Gphn	2.08095e-05	0.314205	0.345	0.06	0.671835
Ermap	2.17364e-05	0.497369	0.172	0.008	0.701758
Hist1h2ap	2.17364e-05	0.330549	0.172	0.008	0.701758
Xist	2.19671e-05	0.695146	1	0.827	0.709206
Dtl	2.30685e-05	0.294596	0.172	0.008	0.744766
Psmd10	2.31616e-05	0.312002	0.448	0.098	0.747773
Tubb5	2.33751e-05	1.32192	0.828	0.579	0.754667
Smarca4	2.43837e-05	0.996658	0.621	0.211	0.787228
Gas2l3	2.59694e-05	0.25556	0.172	0.008	0.838421
Hist1h4d	2.71339e-05	2.0148	0.517	0.188	0.876017
Mta2	2.71619e-05	0.387632	0.414	0.09	0.876921
Rps12	2.73898e-05	0.584737	1	0.992	0.88428
Rnf115	2.94936e-05	0.319161	0.586	0.165	0.952202
Zfpm1	2.97531e-05	0.534762	0.345	0.068	0.96058
Pfdn6	3.01728e-05	0.657745	0.69	0.241	0.974128
Bola3	3.08959e-05	0.538772	0.586	0.195	0.997473
Mns1	3.39346e-05	0.264533	0.276	0.038	1
Stip1	3.4872e-05	0.442206	0.517	0.15	1
Ammecr1	3.60825e-05	0.336001	0.448	0.113	1
Lig1	3.67874e-05	0.442496	0.31	0.053	1
Eif3b	3.71362e-05	0.410414	0.621	0.195	1
Rnaseh2b	3.77863e-05	0.347749	0.345	0.068	1
Gclm	3.90758e-05	0.71349	0.586	0.18	1
Rhno1	3.95824e-05	0.524332	0.31	0.053	1
Mtmr10	3.98718e-05	0.302999	0.276	0.038	1
Myb	4.33458e-05	0.510321	0.379	0.09	1
Mcm2	4.36384e-05	0.411456	0.241	0.03	1
Btrc	4.54992e-05	0.372258	0.345	0.068	1
Fen1	4.75642e-05	0.412137	0.241	0.03	1
Topbp1	4.76635e-05	0.431262	0.483	0.128	1
Irf4	4.93397e-05	0.278314	0.448	0.105	1
Gm43462	5.18232e-05	0.33468	0.241	0.03	1
Agps	5.55896e-05	0.34245	0.414	0.098	1
Cd24a	5.60304e-05	1.28616	0.759	0.421	1
Cyb5b	5.68927e-05	0.395329	0.483	0.135	1
Trmt13	5.89256e-05	0.27284	0.31	0.053	1
Fam129c	6.03043e-05	0.768472	0.414	0.113	1
Pom121	6.16284e-05	0.3696	0.483	0.135	1
Cenpq	6.26145e-05	0.363497	0.276	0.045	1
Uba2	6.26566e-05	0.61747	0.621	0.226	1
Smarca5	6.5021e-05	0.621057	0.897	0.496	1
Hnrnpab	6.82669e-05	0.826611	0.793	0.421	1
Klhdc4	7.24043e-05	0.480702	0.414	0.098	1
Tpp2	7.34036e-05	0.328268	0.483	0.128	1
Gtf2e2	7.67448e-05	0.336618	0.414	0.098	1
Ran	8.1349e-05	0.980459	0.897	0.549	1
Rad50	8.14578e-05	0.540481	0.621	0.203	1
Hells	8.14679e-05	0.487148	0.207	0.023	1
Ift80	8.14878e-05	0.583152	0.276	0.045	1
Bcas2	8.66822e-05	0.688643	0.793	0.353	1
Ube2t	8.9276e-05	0.395403	0.207	0.023	1
Rbpms	8.98434e-05	0.399285	0.655	0.248	1
Orc4	9.01188e-05	0.405956	0.448	0.12	1
Lsm8	9.5023e-05	0.399514	0.655	0.233	1
Hist1h2be	9.56481e-05	0.413152	0.31	0.06	1
Senp1	9.80396e-05	0.344159	0.345	0.075	1
Cops3	0.000100578	0.486987	0.414	0.12	1
Grk5	0.000101828	0.345543	0.276	0.045	1
Donson	0.000102325	0.254044	0.207	0.023	1
Ofd1	0.000102325	0.508905	0.207	0.023	1
Slc25a37	0.000102385	1.1216	0.345	0.083	1
mt-Co3	0.000104631	0.557819	1	0.977	1
Nfx1	0.000106219	0.413958	0.552	0.18	1
Smc1a	0.000108315	0.553523	0.862	0.398	1
A430005L14Rik	0.00011179	0.288563	0.448	0.12	1
Zfp800	0.00011179	0.308912	0.448	0.12	1
Cdk9	0.000115204	0.426381	0.552	0.165	1
Eri1	0.000121432	0.473166	0.448	0.128	1
Rsph1	0.000128152	0.452038	0.207	0.023	1
Abcb10	0.000128416	0.428099	0.241	0.038	1
Gpr171	0.000129476	0.332061	0.31	0.06	1
AU020206	0.00013353	0.332118	0.241	0.038	1
Dazap1	0.00013857	0.520923	0.552	0.195	1
Paics	0.000139402	0.312866	0.793	0.293	1
Myef2	0.000143062	0.259276	0.31	0.06	1
Rbm3	0.00014653	0.816598	0.931	0.707	1
Lsm2	0.000159359	0.454785	0.586	0.203	1
Map3k11	0.000162109	0.31079	0.241	0.038	1
Ppm1g	0.000165283	0.571126	0.621	0.218	1
Supt16	0.000168867	0.657929	0.759	0.323	1
Pgp	0.000172649	0.365162	0.621	0.218	1
Fancl	0.000175078	0.312064	0.241	0.038	1
mt-Co1	0.000177883	0.485621	1	0.992	1
Bub3	0.000180375	0.554808	0.621	0.248	1
Gga2	0.000181041	0.287239	0.483	0.143	1
Ncaph2	0.000181041	0.623478	0.483	0.143	1
Tmcc2	0.000181923	0.413701	0.241	0.038	1
Gps2	0.000185884	0.384254	0.517	0.165	1
Hist1h1e	0.000186516	1.97726	0.655	0.383	1
Ranbp10	0.000191862	0.269034	0.414	0.105	1
Ssrp1	0.000194947	0.811589	0.621	0.286	1
Hmgb2	0.000196448	2.11738	0.897	0.602	1
Hemgn	0.000196893	1.18733	0.103	0	1
Klf1	0.000196893	0.322848	0.103	0	1
Icam4	0.000196893	0.307889	0.103	0	1
Tspo2	0.000196893	0.319934	0.103	0	1
Utp3	0.000200475	0.655943	0.586	0.233	1
Apc	0.000202633	0.369064	0.621	0.226	1
Ccng2	0.000203807	0.320938	0.448	0.128	1
Zfp426	0.000203997	0.329787	0.241	0.038	1
Med8	0.000208383	0.343014	0.586	0.188	1
Lsm5	0.000210365	0.82002	0.621	0.301	1
Gpr155	0.000211898	0.390076	0.241	0.038	1
Git2	0.000217917	0.355323	0.655	0.241	1
Fam53b	0.000220383	0.424697	0.483	0.143	1
Tuba4a	0.000223753	0.634852	0.31	0.075	1
Rpl5	0.000232199	0.519486	1	0.865	1
Nolc1	0.000234541	0.47335	0.448	0.135	1
Ccne2	0.000238179	0.483963	0.138	0.008	1
Fdx2	0.000243395	0.32607	0.448	0.128	1
Ranbp1	0.000245431	0.712956	0.828	0.459	1
Sms	0.000248566	0.530207	0.414	0.12	1
Mzb1	0.000248907	1.12245	0.448	0.15	1
Mtf2	0.000251318	0.549917	0.483	0.15	1
Spta1	0.000252152	0.358426	0.138	0.008	1
Pogz	0.000259371	0.370635	0.345	0.083	1
Hmgb1	0.00026406	1.51445	1	0.835	1
Kmt2b	0.000264137	0.410986	0.414	0.113	1
Map7	0.000266891	0.281727	0.138	0.008	1
H2-Ob	0.00027751	0.407083	0.31	0.068	1
Serinc3	0.00028137	0.751379	0.966	0.579	1
Spin1	0.000305392	0.274302	0.414	0.12	1
Yeats4	0.000306796	0.314137	0.552	0.188	1
Bpgm	0.000311387	0.428231	0.276	0.053	1
Ifi203	0.000312226	0.408394	0.793	0.346	1
Uchl5	0.0003199	0.322508	0.379	0.098	1
Cars2	0.000344406	0.304894	0.31	0.068	1
Gm10115	0.000346861	0.451619	0.414	0.12	1
Dnajc8	0.000351914	0.533669	0.862	0.444	1
Sbk1	0.000362003	0.320856	0.207	0.03	1
Tuba1b	0.000362125	0.932142	0.931	0.729	1
Kif23	0.000376737	0.344389	0.207	0.03	1
Tm9sf1	0.00039944	0.290144	0.414	0.113	1
Meg3	0.000402352	1.25572	0.828	0.489	1
Slbp	0.00041217	0.738252	0.483	0.158	1
Rbm5	0.00044183	0.608413	0.793	0.383	1
Mrpl57	0.000447681	0.602244	0.724	0.338	1
Sdf2l1	0.000462379	0.409788	0.552	0.195	1
Mrps9	0.000462726	0.482094	0.448	0.128	1
Gcc2	0.000470059	0.424787	0.69	0.293	1
Dctpp1	0.000472314	0.370218	0.345	0.09	1
Msh5	0.000477587	0.260445	0.207	0.03	1
Gabpb2	0.000479451	0.440097	0.552	0.203	1
Eif2s1	0.000482285	0.657808	0.621	0.248	1
Arhgap11a	0.000488677	0.252252	0.241	0.045	1
Psmc4	0.000490001	0.396562	0.586	0.226	1
Hirip3	0.000502432	0.297787	0.31	0.075	1
Hbs1l	0.000509596	0.414465	0.448	0.128	1
Pold1	0.000523684	0.580971	0.241	0.045	1
Amer1	0.000523684	0.301956	0.241	0.045	1
Tex30	0.000531607	0.306981	0.276	0.06	1
Rnf5	0.000542051	0.284278	0.241	0.045	1
S100a11	0.000548069	-1.08798	0.966	0.94	1
Itgb3bp	0.000561016	0.262195	0.241	0.045	1
Nmral1	0.000561016	0.331829	0.241	0.045	1
Gar1	0.000564361	0.409035	0.31	0.075	1
Stom	0.000565958	0.341601	0.276	0.06	1
Fxn	0.000565958	0.32241	0.276	0.06	1
Rps15	0.000570077	0.581615	0.931	0.872	1
Cbx5	0.000576811	0.550222	0.759	0.338	1
Srsf1	0.000577346	0.433729	0.724	0.308	1
mt-Nd3	0.000614083	0.618883	0.931	0.669	1
D1Ertd622e	0.000620213	0.323907	0.345	0.09	1
Fbxo30	0.000621379	0.259215	0.276	0.06	1
Uri1	0.000654543	0.280206	0.345	0.09	1
Fam76b	0.000677198	0.336921	0.483	0.158	1
Ctr9	0.000691732	0.263603	0.517	0.165	1
Smc5	0.000691848	0.292925	0.414	0.128	1
Myl4	0.000693484	0.864654	0.276	0.068	1
1810059H22Rik	0.000708467	0.479259	0.172	0.023	1
Rps17	0.000713346	0.480143	0.966	0.917	1
Nubp1	0.000728568	0.287023	0.345	0.09	1
Cabin1	0.000764838	0.354224	0.483	0.165	1
Rbm33	0.000780879	0.357337	0.586	0.241	1
Rif1	0.000798807	0.404438	0.483	0.165	1
Gon4l	0.000798807	0.286308	0.483	0.165	1
E2f4	0.000802108	0.280522	0.414	0.12	1
Taf6	0.000818289	0.448623	0.31	0.075	1
Ccdc88a	0.000822658	0.421232	0.655	0.271	1
Ptma	0.000830555	1.49117	1	0.94	1
Psma6	0.000852663	0.659504	0.69	0.338	1
Klhl6	0.000859105	0.343465	0.345	0.098	1
Rpl23a	0.000880872	0.546475	0.966	0.895	1
Alyref	0.000885326	0.572922	0.69	0.316	1
Stk16	0.000899568	0.261613	0.552	0.195	1
Cdca7	0.000913358	0.377586	0.207	0.038	1
Arhgap1	0.000914233	0.325169	0.448	0.15	1
Zfp644	0.000917582	0.45977	0.69	0.316	1
Xrcc6	0.000936191	0.305878	0.379	0.113	1
Ddx1	0.000961317	0.372303	0.517	0.188	1
Itm2b	0.000971682	-0.813188	0.931	0.97	1
Ube2a	0.000975226	0.446446	0.69	0.308	1
Cc2d1b	0.000981059	0.265029	0.207	0.038	1
Gabpb1	0.00100173	0.86716	0.241	0.053	1
Psip1	0.00100375	0.436839	0.759	0.361	1
Tlnrd1	0.00100715	0.292483	0.379	0.113	1
Zfp280d	0.00101202	0.271747	0.483	0.165	1
Herpud1	0.00103925	0.454004	0.69	0.316	1
Vpreb3	0.0010465	1.05599	0.483	0.203	1
Pml	0.00106711	0.310391	0.448	0.15	1
Rfc4	0.00107133	0.473149	0.276	0.075	1
Hmgcr	0.00108224	0.405953	0.345	0.098	1
Emg1	0.00108977	0.431214	0.724	0.346	1
Upf3b	0.00110952	0.518548	0.379	0.113	1
Spon2	0.00111159	0.718369	0.517	0.203	1
Rpl13a	0.00111396	0.585985	1	0.902	1
Lbh	0.00113602	0.437141	0.586	0.226	1
Srp9	0.00114964	0.537858	0.828	0.511	1
Srrm1	0.0011734	0.470505	0.862	0.466	1
H2afz	0.00118619	1.77741	0.828	0.639	1
Pbrm1	0.0011933	0.479085	0.966	0.571	1
Stag1	0.00120565	0.474422	0.621	0.301	1
Gfra1	0.00121304	0.542783	0.207	0.038	1
Lgr4	0.00121846	0.36136	0.345	0.105	1
Sod1	0.00122052	0.318819	0.759	0.323	1
Rplp2	0.00124226	0.476773	0.966	0.932	1
Ly6e	0.00124759	0.491301	0.931	0.609	1
Traf5	0.00124969	0.27106	0.241	0.053	1
2700049A03Rik	0.00125631	0.251389	0.207	0.038	1
Dot1l	0.00128342	0.368143	0.276	0.068	1
BC035044	0.00128942	0.399419	0.241	0.053	1
Smc3	0.00129633	0.635673	0.724	0.436	1
Atad5	0.001301	0.267637	0.207	0.038	1
Chchd10	0.00130637	0.338116	0.483	0.173	1
Alad	0.00133031	0.438611	0.241	0.053	1
Dyrk1a	0.00136664	0.509723	0.414	0.135	1
Rnf126	0.0013943	0.288449	0.31	0.083	1
Tent5c	0.00139481	0.256703	0.207	0.038	1
Snhg8	0.00140734	0.436794	0.793	0.398	1
Map2k5	0.0014157	0.283603	0.241	0.053	1
[truncated: 1,559 more rows]

## Sheet: Sup Table 9
Supp Table 9 Periosteum CD90 Aged IF vs Aged AL	p_val	avg_log2FC	pct.1	pct.2	p_val_adj
[truncated: 310 more rows]

[truncated: 3 more sheets: Sup Table 10, Sup Table 11, Sup Table 12]
